# Supplementary material
Source: PubMed Central journal article supplement (PMC3171577)

# Parallel Synthesis of a Desketoralexifene Analogue Library via Iodocyclization/Palladium-Catalyzed Coupling

Chul-Hee Cho,<sup>†</sup> Dai-Il Jung,<sup>†,‡</sup> Benjamin Neuenswander,<sup>§</sup> and Richard C. Larock<sup>†,\*</sup>

<sup>†</sup>Department of Chemistry, Iowa State University, Ames, Iowa 50011, United States

<sup>‡</sup>Department of Chemistry, Dong-A University, Saha-Gu, Busan 604-714, Korea

<sup>§</sup>NIH Center of Excellence in Chemical Methodologies and Library Development, University of Kansas,  
Lawrence, Kansas 66047, United States

## Supporting Information

### Contents

|                                                                      |          |
|----------------------------------------------------------------------|----------|
| 1. General considerations                                            | S2       |
| 2. Experimental details and characterization                         | S2-S34   |
| 3. References                                                        | S35      |
| 4. Copies of selected <sup>1</sup> H and <sup>13</sup> C NMR spectra | S36-S112 |

The  $^1\text{H}$  (400 MHz) and  $^{13}\text{C}$  NMR (100 MHz) spectra were recorded in  $\text{CDCl}_3$  as the solvent using tetramethylsilane (TMS) as an internal standard, unless otherwise stated. Chemical shifts are reported in  $\delta$  units (ppm) by assigning the TMS resonance in the  $^1\text{H}$  NMR spectrum as 0.00 ppm and the  $\text{CDCl}_3$  resonance in the  $^{13}\text{C}$  NMR spectrum as 77.23 ppm. All coupling constants,  $J$ , are reported in Hertz (Hz). Analytical thin layer chromatography (TLC) was performed using commercially prepared 60-mesh silica gel plates, and visualization was effected with short wavelength UV light (254 nm). All melting points are uncorrected. High resolution mass spectra (HRMS) were obtained using a Waters/Micromass LCT Premier TOF instrument. Commercially available reagents were used without further purification unless otherwise stated. The organic solvents (*e.g.*  $\text{Et}_2\text{O}$ ,  $\text{EtOAc}$ ,  $\text{CHCl}_3$ ,  $\text{MeOH}$ ,  $\text{EtOH}$ ,  $\text{CH}_3\text{CN}$ ,  $\text{DMF}$ , hexane, toluene, *etc.*) were used as anhydrous solvents. THF and  $\text{CH}_2\text{Cl}_2$  were distilled from sodium/benzophenone and  $\text{CaH}_2$  respectively under an atmosphere of argon prior to use. The palladium catalysts, such as  $\text{PdCl}_2(\text{PPh}_3)_2$  and  $\text{Pd}(\text{PPh}_3)_4$ , were donated by Johnson Matthey Inc. and Kawaken Fine Chemicals Co. Ltd. The 4-[(tetrahydro-2*H*-pyran-2-yl)oxy]benzeneboronic acid was donated by Frontier Scientific Co. Ltd.

#### ◆ Preparation of starting materials **1**

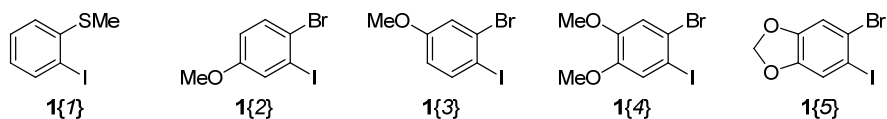

1-Iodo-2-(methylthio)benzene [**1{1}**] was obtained commercially. 1-Bromo-2-iodo-4-methoxybenzene [**1{2}**], 1-bromo-2-iodo-4,5-dimethoxybenzene [**1{4}**], and 5-bromo-6-iodo-1,3-benzodioxole [**1{5}**] were prepared according to a published procedure as a single isomer through regioselective bromination of 3-iodoanisole, 1-iodo-3,4-dimethoxybenzene, and 1-iodo-3,4-(methylenedioxy)benzene, respectively, using  $\text{Br}_2$ .<sup>1</sup> 3-Bromo-4-iodoanisole [**1{3}**] was prepared according to a published procedure through regioselective iodination of 3-bromoanisole, 1-(tosyloxy)benzodioxolone and  $\text{I}_2$ .<sup>2</sup>

### ◆ Preparation of the Bromoalkynes **2**

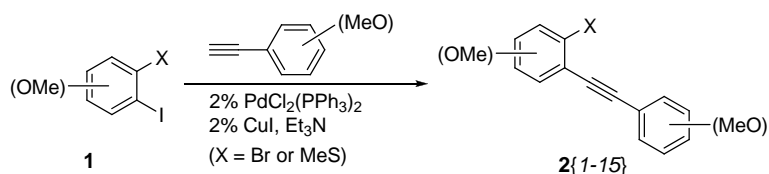

To a solution of dihalobenzene **1** (10.0 mmol), 2 mol % PdCl<sub>2</sub>(PPh<sub>3</sub>)<sub>2</sub> and 2 mol % CuI in Et<sub>3</sub>N (20 mL), the terminal alkyne (10.5 mmol) was added. The reaction mixture was stirred vigorously at 50 °C for *ca.* 5-8 h under an Ar atmosphere. The resulting mixture was diluted with EtOAc (2 × 200 mL). The separated organic layer was washed with water and brine, dried over MgSO<sub>4</sub>, and concentrated *in vacuo*. The crude product was purified by column chromatography on silica gel using ethyl acetate/hexanes as the eluent to afford the corresponding products **2**. Products **2**{1-14} have been reported in our previous publications.<sup>3-6</sup>

### ◆ General procedure for methylthiolation to form compounds **3**

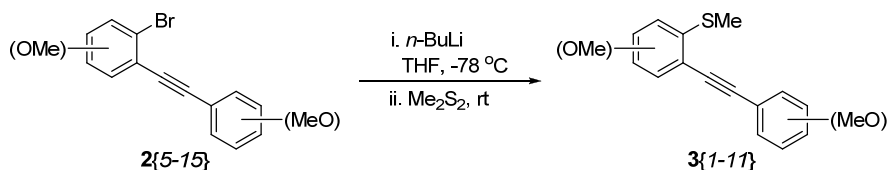

The bromoalkyne **2** (8.0 mmol) was dissolved in dry THF (80 mL) under an Ar atmosphere and cooled to -78 °C for 0.5 h. Then, 2.0 equiv of *n*-BuLi (2.0 M solution in cyclohexane, 8.0 mmol) was added dropwise to the stirred solution. After the addition was complete, the reaction was stirred for 1 h at -78 °C. Dimethyl disulfide (9.6 mmol) was then added and the reaction mixture was stirred further at this temperature under an Ar atmosphere before being allowed to warm to room temperature for 2 h. The resulting mixture was diluted with EtOAc (2 × 160 mL). The separated organic layer was washed with water and brine, dried over MgSO<sub>4</sub>, and concentrated *in vacuo*. The crude product was purified by column chromatography on silica gel using ethyl acetate/hexanes as the eluent to afford the corresponding products **3**. Products **3**{1-7,9-11} have been reported in our previous publications.<sup>3,5</sup>

### Compound **3**{**8**}

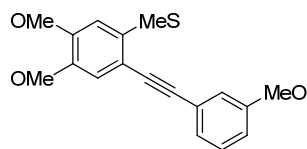

The product was obtained as a yellow oil (63% yield):  $^1\text{H}$  NMR (400 MHz,  $\text{CDCl}_3$ )  $\delta$  2.53 (s, 3H), 3.82 (s, 3H), 3.88 (s, 3H), 3.92 (s, 3H), 6.81 (s, 1H), 6.89 (dd,  $J = 2.5, 8.5$  Hz, 1H), 7.03 (s, 1H), 7.07-7.10 (m, 1H), 7.16 (d,  $J = 7.6$  Hz, 1H), 7.23-7.28 (m, 1H);  $^{13}\text{C}$  NMR (100 MHz,  $\text{CDCl}_3$ )  $\delta$  17.1, 55.5, 56.2, 56.3, 87.4, 94.0, 111.1, 114.90, 114.91, 115.4, 116.4, 124.2, 124.6, 129.5, 133.3, 147.2, 149.9, 159.5; HRMS calcd for  $\text{C}_{18}\text{H}_{18}\text{O}_3\text{S}$  [ $\text{M}^+$ ], 314.0977, found 314.0983.

◆ **General procedure for iodocyclization using  $\text{I}_2$  to prepare compounds **4****

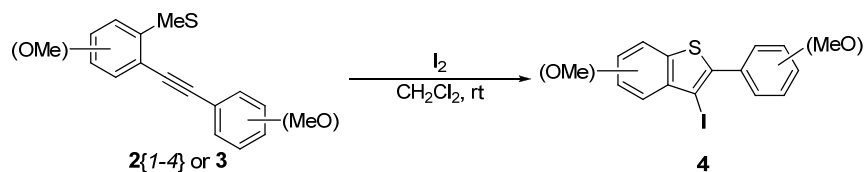

To a solution of 5.0 mmol of the alkynes **2**{1-4} and **3**{1-11} in  $\text{CH}_2\text{Cl}_2$  (20 mL) was added gradually 1.2 equiv of  $\text{I}_2$  dissolved in  $\text{CH}_2\text{Cl}_2$  (30 mL). The reaction mixture was allowed to stir at room temperature for up to 10 min. The reaction was monitored by TLC to establish completion. The remaining  $\text{I}_2$  was removed by washing with satd aq  $\text{Na}_2\text{S}_2\text{O}_3$ . The mixture was then extracted by EtOAc (2  $\times$  100 mL). The combined organic layers were dried over anhydrous  $\text{MgSO}_4$  and concentrated under a vacuum to yield the crude product, which was purified by flash chromatography using EtOAc/hexanes as the eluent to afford the corresponding products **4**.

**3-Iodobenzo[*b*]thiophene **4**{1}**

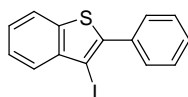

The product was obtained as pale yellow oil that solidified upon standing to an ivory solid (91% yield):  $^1\text{H}$  NMR (400 MHz,  $\text{CDCl}_3$ )  $\delta$  7.31-7.52 (m, 5H), 7.60-7.88 (m, 4H);  $^{13}\text{C}$  NMR (100 MHz,  $\text{CDCl}_3$ )  $\delta$  79.6, 122.3, 125.6, 125.7, 126.5, 128.7 ( $\times 2$ ), 129.1, 130.2 ( $\times 2$ ), 134.8, 139.1, 142.1, 142.4.

**3-Iodobenzo[*b*]thiophene **4**{2}<sup>3</sup>**

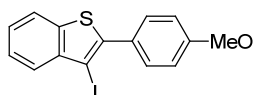

The product was obtained as a white solid (96% yield): mp 84-85 °C (uncorrected);  $^1\text{H}$  NMR (400 MHz,  $\text{CDCl}_3$ )  $\delta$  3.80 (s, 3H), 6.95 (d,  $J = 8.7$  Hz, 2H), 7.32 (t,  $J = 7.8$  Hz, 1H), 7.41 (t,  $J = 7.8$  Hz, 1H), 7.59 (d,  $J = 8.7$  Hz, 2H), 7.71 (d,  $J = 7.8$  Hz, 1H), 7.77 (d,  $J = 8.0$  Hz, 1H);  $^{13}\text{C}$  NMR (100 MHz,  $\text{CDCl}_3$ )  $\delta$  55.5, 79.1, 114.0 ( $\times 2$ ), 122.2, 125.4, 125.5, 126.2, 126.9, 131.4 ( $\times 2$ ), 138.9, 142.0, 142.2, 160.2; HRMS calcd for  $\text{C}_{15}\text{H}_{11}\text{IOS}$  [ $\text{M}^+$ ], 365.9575, found 365.9578.

### 3-Iodobenzo[*b*]thiophene 4{3}

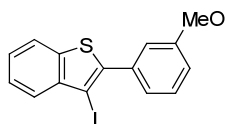

The product was obtained as a pale yellow solid (88% yield): mp 73-74 °C (uncorrected);  $^1\text{H}$  NMR (400 MHz,  $\text{CDCl}_3$ )  $\delta$  3.90 (s, 3H), 6.98-7.04 (m, 1H), 7.27-7.32 (m, 2H), 7.38-7.44 (m, 2H), 7.49 (t,  $J = 8.1$  Hz, 1H), 7.80 (d,  $J = 7.7$  Hz, 1H), 7.86 (d,  $J = 8.1$  Hz, 1H);  $^{13}\text{C}$  NMR (100 MHz,  $\text{CDCl}_3$ )  $\delta$  55.6, 79.6, 114.9, 115.6, 122.3, 122.6, 125.6, 125.7, 126.5, 129.7, 136.0, 139.0, 142.0, 142.1, 159.6; HRMS calcd for  $\text{C}_{15}\text{H}_{11}\text{IOS}$  [ $\text{M}^+$ ], 365.9575, found 365.9577.

### 3-Iodobenzo[*b*]thiophene 4{4}

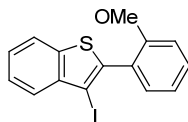

The product was obtained as a pale yellow solid (89% yield): mp 105-106 °C (uncorrected);  $^1\text{H}$  NMR (400 MHz,  $\text{CDCl}_3$ )  $\delta$  3.73 (s, 3H), 6.92 (d,  $J = 8.2$  Hz, 1H), 7.00 (d,  $J = 7.5$  Hz, 1H), 7.27-7.41 (m, 4H), 7.71 (d,  $J = 7.9$  Hz, 1H), 7.77 (d,  $J = 8.1$  Hz, 1H);  $^{13}\text{C}$  NMR (100 MHz,  $\text{CDCl}_3$ )  $\delta$  55.7, 82.9, 111.5, 120.5, 122.2, 123.5, 125.2, 125.3, 126.0, 130.8, 132.5, 139.5, 139.7, 141.3, 157.1; HRMS calcd for  $\text{C}_{15}\text{H}_{11}\text{IOS}$  [ $\text{M}^+$ ], 365.9575, found 365.9575.

### 3-Iodobenzo[*b*]thiophene 4{5}

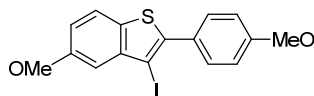

The product was obtained as a pale yellow solid (94% yield): mp 114-115 °C (uncorrected);  $^1\text{H}$  NMR (400 MHz,  $\text{CDCl}_3$ )  $\delta$  3.83 (s, 3H), 3.90 (s, 3H), 6.95-7.00 (m, 3H), 7.24 (d,  $J = 2.4$  Hz, 1H), 7.58-7.60 (m, 3H);  $^{13}\text{C}$  NMR (100 MHz,  $\text{CDCl}_3$ )  $\delta$  55.5, 55.8, 78.8, 108.4, 114.0 ( $\times 2$ ), 115.7, 123.0, 127.1, 131.1 ( $\times 2$ ), 131.3, 143.2, 143.5, 158.6, 160.2; HRMS calcd for  $\text{C}_{16}\text{H}_{13}\text{IO}_2\text{S}$  [ $\text{M}^+$ ], 395.9681, found 395.9684.

### 3-Iodobenzo[*b*]thiophene 4{6}<sup>3,5</sup>

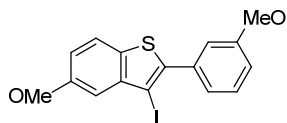

The product was obtained as a yellow oil (89% yield): <sup>1</sup>H NMR (400 MHz, CDCl<sub>3</sub>) δ 3.87 (s, 3H), 3.94 (s, 3H), 6.96-7.05 (m, 2H), 7.23-7.29 (m, 3H), 7.38 (t, *J* = 8.1 Hz, 1H), 7.65 (d, *J* = 8.8 Hz, 1H); <sup>13</sup>C NMR (100 MHz, CDCl<sub>3</sub>) δ 55.6, 55.9, 79.3, 108.6, 114.9, 115.5, 116.1, 122.6, 123.1, 129.7, 131.2, 136.1, 143.2, 143.4, 158.7, 159.8; HRMS calcd for C<sub>16</sub>H<sub>13</sub>IO<sub>2</sub>S [M<sup>+</sup>], 395.9681, found 395.9686.

### 3-Iodobenzo[*b*]thiophene 4{7}<sup>3,5</sup>

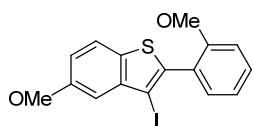

The product was obtained as a yellow oil (94% yield): <sup>1</sup>H NMR (400 MHz, CDCl<sub>3</sub>) δ 3.77 (s, 3H), 3.88 (s, 3H), 6.92-7.05 (m, 3H), 7.24 (d, *J* = 2.0 Hz, 1H), 7.34-7.42 (m, 2H), 7.60 (d, *J* = 8.7 Hz, 1H); <sup>13</sup>C NMR (100 MHz, CDCl<sub>3</sub>) δ 55.7, 55.8, 82.6, 108.1, 111.5, 115.7, 120.5, 123.0, 123.7, 130.8, 131.7, 132.5, 141.0, 142.5, 157.1, 158.4; HRMS calcd for C<sub>16</sub>H<sub>13</sub>IO<sub>2</sub>S [M<sup>+</sup>], 395.9681, found 395.9677.

### 3-Iodobenzo[*b*]thiophene 4{8}<sup>3,5</sup>

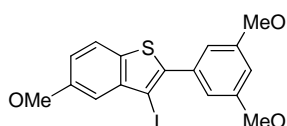

The product was obtained as a yellow solid (88% yield): mp 135-136 °C (uncorrected); <sup>1</sup>H NMR (400 MHz, CDCl<sub>3</sub>) δ 3.85 (s, 6H), 3.93 (s, 3H), 6.54 (t, *J* = 2.2 Hz, 1H), 6.83 (d, *J* = 2.3 Hz, 2H), 7.02 (dd, *J* = 2.4, 8.7 Hz, 1H), 7.27 (d, *J* = 2.4 Hz, 1H), 7.64 (d, *J* = 8.7 Hz, 1H); <sup>13</sup>C NMR (100 MHz, CDCl<sub>3</sub>) δ 55.7 (×2), 55.9, 79.2, 101.3, 108.2 (×2), 108.6, 116.1, 123.1, 131.1, 136.5, 143.1, 143.4, 158.7, 160.7 (×2); HRMS calcd for C<sub>17</sub>H<sub>15</sub>IO<sub>3</sub>S [M<sup>+</sup>], 425.9787, found 425.9795.

### 3-Iodobenzo[*b*]thiophene 4{9}<sup>3,5</sup>

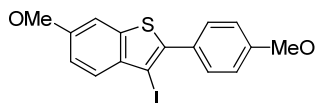

The product was obtained as a yellow solid (95% yield): mp 112-113 °C (uncorrected); <sup>1</sup>H NMR

(400 MHz, CDCl<sub>3</sub>) δ 3.85 (s, 3H), 3.87 (s, 3H), 6.98 (d, *J* = 8.5 Hz, 2H), 7.05 (dd, *J* = 1.9, 8.8 Hz, 1H), 7.24 (d, *J* = 2.0 Hz, 1H), 7.59 (d, *J* = 8.6 Hz, 2H), 7.66 (d, *J* = 8.8 Hz, 1H); <sup>13</sup>C NMR (100 MHz, CDCl<sub>3</sub>) δ 55.5, 55.9, 78.2, 104.7, 114.1 (×2), 115.3, 126.9, 127.1, 131.4 (×2), 136.2, 139.9, 158.3, 160.0; HRMS calcd for C<sub>16</sub>H<sub>13</sub>IO<sub>2</sub>S [M<sup>+</sup>], 395.9681, found 395.9686.

### 3-Iodobenzo[*b*]thiophene 4{10}<sup>3</sup>

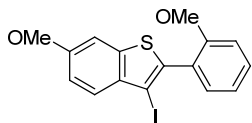

The product was obtained as a colorless oil (93% yield): <sup>1</sup>H NMR (400 MHz, CDCl<sub>3</sub>) δ 3.78 (s, 3H), 3.83 (s, 3H), 6.96 (d, *J* = 8.2 Hz, 1H), 6.99-7.06 (m, 2H), 7.24 (d, *J* = 2.3 Hz, 1H), 7.35-7.43 (m, 2H), 7.65 (d, *J* = 8.9 Hz, 1H); <sup>13</sup>C NMR (100 MHz, CDCl<sub>3</sub>) δ 55.7, 55.9, 82.0, 104.6, 111.5, 115.1, 120.5, 123.7, 126.6, 130.7, 132.7, 135.5, 136.9, 140.6, 157.2, 158.2; HRMS calcd for C<sub>16</sub>H<sub>13</sub>IO<sub>2</sub>S [M<sup>+</sup>], 395.9681, found 395.9686.

### 3-Iodobenzo[*b*]thiophene 4{11}<sup>3,5</sup>

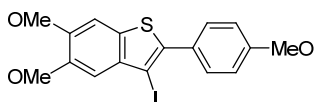

The product was obtained as a pale yellow solid (89% yield): mp 140-142 °C (uncorrected); <sup>1</sup>H NMR (400 MHz, CDCl<sub>3</sub>) δ 3.86 (s, 3H), 3.96 (s, 3H), 4.01 (s, 3H), 6.98 (d, *J* = 8.8 Hz, 2H), 7.21 (s, 1H), 7.22 (s, 1H), 7.59 (d, *J* = 8.8 Hz, 2H); <sup>13</sup>C NMR (100 MHz, CDCl<sub>3</sub>) δ 55.5, 56.3, 56.5, 78.2, 103.6, 107.5, 114.0 (×2), 127.2, 130.3, 131.3 (×2), 135.7, 140.2, 149.0, 149.1, 160.0; HRMS calcd for C<sub>17</sub>H<sub>15</sub>IO<sub>3</sub>S [M<sup>+</sup>], 425.9787, found 425.9795.

### 3-Iodobenzo[*b*]thiophene 4{12}

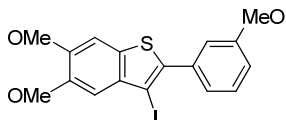

The product was obtained as a pale yellow solid (85% yield): mp 134-136 °C (uncorrected); <sup>1</sup>H NMR (400 MHz, CDCl<sub>3</sub>) δ 3.86 (s, 3H), 3.96 (s, 3H), 4.01 (s, 3H), 6.93-6.97 (m, 1H), 7.21-7.27 (m, 4H), 7.36 (t, *J* = 8.2 Hz, 1H); <sup>13</sup>C NMR (100 MHz, CDCl<sub>3</sub>) δ 55.6, 56.4, 56.5, 78.6, 103.6, 107.6, 114.5, 115.5, 122.5, 129.7, 131.1, 135.8, 136.1, 140.0, 149.25, 149.3, 159.6; HRMS calcd for C<sub>17</sub>H<sub>15</sub>IO<sub>3</sub>S [M<sup>+</sup>], 425.9787, found 425.9791.

### 3-Iodobenzo[*b*]thiophene 4{13}<sup>3</sup>

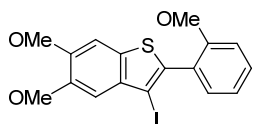

The product was obtained as a yellow solid (83% yield): mp 144-145 °C (uncorrected);  $^1\text{H}$  NMR (400 MHz,  $\text{CDCl}_3$ )  $\delta$  3.81 (s, 3H), 3.94 (s, 3H), 4.01 (s, 3H), 6.96-7.07 (m, 2H), 7.21 (s, 1H), 7.23 (s, 1H), 7.35-7.43 (m, 2H);  $^{13}\text{C}$  NMR (100 MHz,  $\text{CDCl}_3$ )  $\delta$  55.8, 56.3, 56.5, 81.9, 103.6, 107.3, 111.5, 120.5, 123.8, 130.7, 131.7, 132.7, 135.1, 137.5, 148.98, 149.02, 157.2; HRMS calcd for  $\text{C}_{17}\text{H}_{15}\text{IO}_3\text{S}$  [ $\text{M}^+$ ], 425.9787, found 425.9795.

### 3-Iodobenzo[*b*]thiophene 4{14}<sup>3</sup>

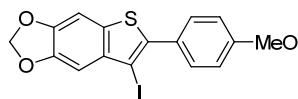

The product was obtained as a white solid (94% yield): mp 163-164 °C (uncorrected);  $^1\text{H}$  NMR (400 MHz,  $\text{CDCl}_3$ )  $\delta$  3.86 (s, 3H), 6.04 (s, 2H), 6.98 (d,  $J = 8.7$  Hz, 2H), 7.14 (s, 1H), 7.23 (s, 1H), 7.57 (d,  $J = 8.7$  Hz, 2H);  $^{13}\text{C}$  NMR (100 MHz,  $\text{CDCl}_3$ )  $\delta$  55.6, 78.3, 101.3, 101.8, 105.4, 114.1 ( $\times 2$ ), 127.2, 131.3 ( $\times 2$ ), 132.4, 137.1, 140.7, 147.4, 147.7, 160.1; HRMS calcd for  $\text{C}_{16}\text{H}_{11}\text{IO}_3\text{S}$  [ $\text{M}^+$ ], 409.9474, found 409.9479.

### 3-Iodobenzo[*b*]thiophene 4{15}<sup>3</sup>

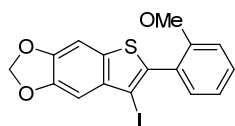

The product was obtained as a yellow solid (85% yield): mp 135-136.5 °C (uncorrected);  $^1\text{H}$  NMR (400 MHz,  $\text{CDCl}_3$ )  $\delta$  3.77 (s, 3H), 5.97 (s, 2H), 6.94 (d,  $J = 8.2$  Hz, 1H), 7.00 (t,  $J = 7.5$  Hz, 1H), 7.11 (s, 1H), 7.21 (s, 1H), 7.33-7.37 (m, 2H);  $^{13}\text{C}$  NMR (100 MHz,  $\text{CDCl}_3$ )  $\delta$  55.7, 82.0, 101.2, 101.6, 105.1, 111.4, 120.4, 123.7, 130.7, 132.6, 133.0, 136.3, 137.9, 147.3, 147.5, 157.1; HRMS calcd for  $\text{C}_{16}\text{H}_{11}\text{IO}_3\text{S}$  [ $\text{M}^+$ ], 409.9474, found 409.9479.

### ◆ General procedure for Suzuki-Miyaura coupling to prepare compounds 5

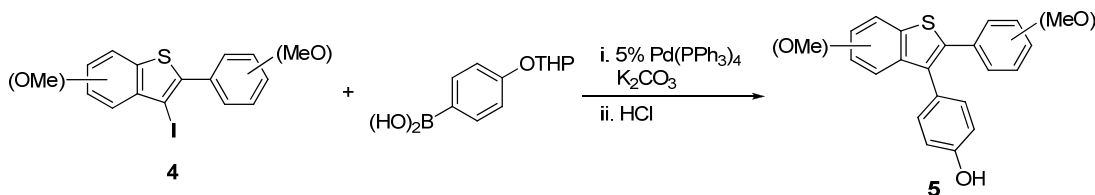



To a solution of **4** (1.0 mmol) and 5 mol % of Pd(PPh<sub>3</sub>)<sub>4</sub> in toluene (10 mL) was added K<sub>2</sub>CO<sub>3</sub> (2.5 mmol) under an Ar atmosphere. To the resulting mixture was added the THP-protected phenylboronic acid (1.5 mmol) dissolved in ethanol (2 mL) and water (0.5 mL) and the mixture was heated at 80 °C for 6-8 h with vigorous stirring. After concentration of the solvent under reduced pressure, to the crude compounds in THF (0.1 M conc.) was added 10% aq HCl at room temperature and then the mixture was stirred for 1 h. The mixture was then extracted by EtOAc (2 × 20 mL) and the aqueous phase was also extracted with EtOAc or CH<sub>2</sub>Cl<sub>2</sub>. The combined organic layers were dried over anhydrous MgSO<sub>4</sub> and concentrated under a vacuum to yield the crude product, which was purified by flash chromatography using EtOAc/hexanes as the eluent to afford the corresponding products **5**.

### Compound 5{2}

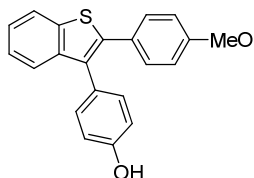

The product was obtained as pale yellow oil that solidified upon standing to an ivory solid (92% yield): mp 201-202 °C (uncorrected); <sup>1</sup>H NMR (400 MHz, CDCl<sub>3</sub>) δ 3.79 (s, 3H), 5.16 (br s, 1H), 6.79 (d, *J* = 8.7 Hz, 2H), 6.85 (d, *J* = 8.4 Hz, 2H), 7.20 (d, *J* = 8.4 Hz, 2H), 7.26 (d, *J* = 8.7 Hz, 2H), 7.29-7.34 (m, 2H), 7.54-7.57 (m, 1H), 7.83-7.86 (m, 1H); <sup>13</sup>C NMR (100 MHz, CDCl<sub>3</sub>) δ 55.5, 114.0 (×2), 115.9 (×2), 122.2, 123.3, 124.4, 124.5, 127.0, 128.2, 130.9 (×2), 131.9 (×2), 132.1, 138.7, 139.2, 141.3, 155.1, 159.3; HRMS calcd for C<sub>22</sub>H<sub>17</sub>O<sub>4</sub>S [M+HCOO<sup>+</sup>], 377.0848, found 377.0848.

### Compound 5{3}

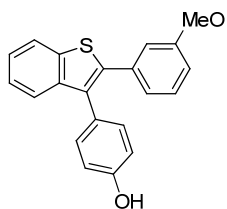

The product was obtained as pale yellow oil that solidified upon standing to an ivory solid (84% yield): mp 145-146 °C (uncorrected); <sup>1</sup>H NMR (400 MHz, CDCl<sub>3</sub>) δ 3.62 (s, 3H), 5.62 (br s, 1H), 6.78 (dd, *J* = 2.6, 8.2 Hz, 1H), 6.84-6.88 (m, 3H), 6.96 (d, *J* = 7.7 Hz, 1H), 7.13-7.23 (m, 3H), 7.30-7.35 (m, 2H), 7.56-7.59 (m, 1H), 7.82-7.87 (m, 1H); <sup>13</sup>C NMR (100 MHz, CDCl<sub>3</sub>) δ 55.3, 114.0, 114.8, 115.9 (×2), 122.3, 123.5, 124.6, 124.7, 128.0, 129.6, 131.9 (×2), 133.2, 135.8, 138.9, 139.1,

141.2, 155.2, 159.4; HRMS calcd for C<sub>21</sub>H<sub>16</sub>O<sub>2</sub>S [M<sup>+</sup>], 332.0871, found 332.0869.

#### Compound 5{4}

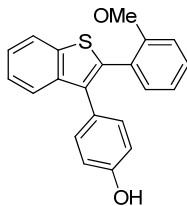

The product was obtained as a pale yellow oil (89% yield): <sup>1</sup>H NMR (400 MHz, CDCl<sub>3</sub>) δ 3.56 (s, 3H), 5.05 (br s, 1H), 6.76 (d, *J* = 8.6 Hz, 2H), 6.82-6.89 (m, 2H), 7.16 (d, *J* = 8.6 Hz, 2H), 7.21-7.29 (m, 2H), 7.31-7.36 (m, 2H), 7.66-7.72 (m, 1H), 7.83-7.87 (m, 1H); <sup>13</sup>C NMR (100 MHz, CDCl<sub>3</sub>) δ 55.5, 111.4, 115.3 (×2), 120.6, 122.3, 123.3, 123.4, 124.3, 124.4, 128.7, 129.8, 131.2 (×2), 132.8, 134.7, 135.5, 139.9, 140.0, 154.6, 157.2; HRMS calcd for C<sub>22</sub>H<sub>17</sub>O<sub>4</sub>S [M+HCOO<sup>+</sup>], 377.0848, found 377.0851.

#### Compound 5{5}

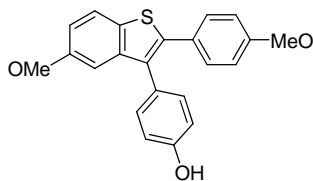

The product was obtained as a pale yellow oil (89% yield): <sup>1</sup>H NMR (400 MHz, CDCl<sub>3</sub>) δ 3.78 (s, 3H), 3.78 (s, 3H), 5.12 (br s, 1H), 6.78 (d, *J* = 8.8 Hz, 2H), 6.87 (d, *J* = 8.5 Hz, 2H), 6.96-7.03 (m, 2H), 7.20 (d, *J* = 8.5 Hz, 2H), 7.23 (d, *J* = 8.8 Hz, 2H), 7.70 (d, *J* = 8.6 Hz, 1H); <sup>13</sup>C NMR (100 MHz, CDCl<sub>3</sub>) δ 55.5, 55.8, 105.8, 114.0 (×2), 114.3, 115.9 (×2), 122.9, 127.1, 128.3, 130.8 (×2), 131.1, 131.85 (×2), 131.89, 140.7, 142.4, 155.0, 157.8, 159.2; HRMS calcd for C<sub>22</sub>H<sub>18</sub>O<sub>3</sub>S [M<sup>+</sup>], 362.0977, found 362.0983.

#### Compound 5{6}

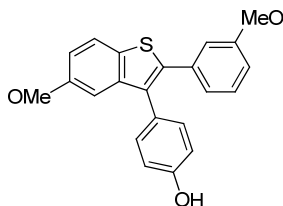

The product was obtained as pale yellow oil that solidified upon standing to an ivory solid (86% yield): mp 142-143 °C (uncorrected); <sup>1</sup>H NMR (400 MHz, CDCl<sub>3</sub>) δ 3.62 (s, 3H), 3.78 (s, 3H), 5.45 (br s, 1H), 6.77 (dd, *J* = 2.5, 8.2 Hz, 1H), 6.82-6.85 (m, 1H), 6.86 (d, *J* = 8.6 Hz, 2H), 6.93 (d, *J* = 8.2

Hz, 1H), 6.98-7.05 (m, 2H), 7.15 (t,  $J = 7.8$  Hz, 1H), 7.19 (d,  $J = 8.6$  Hz, 2H), 7.71 (d,  $J = 8.6$  Hz, 1H);  $^{13}\text{C}$  NMR (100 MHz,  $\text{CDCl}_3$ )  $\delta$  55.3, 55.8, 105.9, 114.0, 114.71, 114.74, 115.9 ( $\times 2$ ), 122.2, 123.0, 128.1, 129.6, 131.3, 131.8 ( $\times 2$ ), 132.9, 135.9, 140.5, 142.2, 155.1, 157.8, 159.3; HRMS calcd for  $\text{C}_{22}\text{H}_{18}\text{O}_3\text{S}$  [ $\text{M}^+$ ], 362.0977, found 362.0983.

#### Compound 5{7}<sup>5</sup>

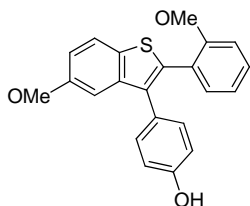

The product was obtained as a pale yellow oil (91% yield):  $^1\text{H}$  NMR (400 MHz,  $\text{CDCl}_3$ )  $\delta$  3.54 (s, 3H), 3.79 (s, 3H), 5.74 (br s, 1H), 6.76 (d,  $J = 8.7$  Hz, 2H), 6.79-6.89 (m, 2H), 6.99 (dd,  $J = 2.5, 8.7$  Hz, 1H), 7.14 (d,  $J = 8.7$  Hz, 2H), 7.14-7.16 (m, 1H), 7.20-7.27 (m, 2H), 7.71 (d,  $J = 8.7$  Hz, 1H);  $^{13}\text{C}$  NMR (100 MHz,  $\text{CDCl}_3$ )  $\delta$  55.5, 55.8, 105.8, 111.4, 114.4, 115.4 ( $\times 2$ ), 120.5, 123.0, 123.5, 128.6, 129.7, 131.1 ( $\times 2$ ), 132.3, 132.7, 134.5, 136.8, 141.0, 154.8, 157.1, 157.6; HRMS calcd for  $\text{C}_{22}\text{H}_{18}\text{O}_3\text{S}$  [ $\text{M}^+$ ], 362.0977, found 362.0983.

#### Compound 5{8}<sup>5</sup>

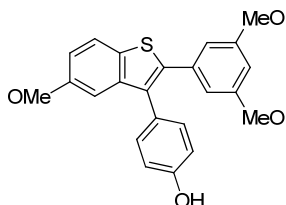

The product was obtained as pale yellow oil that solidified upon standing to an ivory solid (83% yield): mp 172-174 °C (uncorrected);  $^1\text{H}$  NMR (400 MHz,  $\text{CDCl}_3$ )  $\delta$  3.63 (s, 6H), 3.79 (s, 3H), 5.13 (br s, 1H), 6.35 (br s, 1H), 6.48 (d,  $J = 2.2$  Hz, 2H), 6.88 (d,  $J = 7.9$  Hz, 2H), 6.98-7.04 (m, 2H), 7.21 (d,  $J = 7.9$  Hz, 2H), 7.72 (d,  $J = 8.5$  Hz, 1H);  $^{13}\text{C}$  NMR (100 MHz,  $\text{CDCl}_3$ )  $\delta$  55.4 ( $\times 2$ ), 55.8, 100.4, 105.8, 107.7 ( $\times 2$ ), 114.8, 115.9 ( $\times 2$ ), 123.0, 128.0, 131.2, 131.8 ( $\times 2$ ), 133.1, 136.4, 140.5, 142.2, 155.4, 157.8, 160.5 ( $\times 2$ ); HRMS calcd for  $\text{C}_{24}\text{H}_{21}\text{O}_6\text{S}$  [ $\text{M}+\text{HCOO}^+$ ], 437.1059, found 437.1044.

#### Compound 5{9}<sup>5</sup>

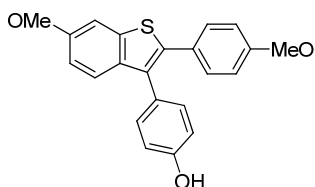

The product was obtained as pale yellow oil that solidified upon standing to an ivory solid (81% yield): mp 185-186 °C (uncorrected);  $^1\text{H}$  NMR (400 MHz,  $\text{CDCl}_3$ )  $\delta$  3.78 (s, 3H), 3.89 (s, 3H), 5.04 (br s, 1H), 6.78 (d,  $J$  = 8.9 Hz, 2H), 6.86 (d,  $J$  = 8.6 Hz, 2H), 6.94 (dd,  $J$  = 2.4, 8.9 Hz, 1H), 7.19 (d,  $J$  = 8.6 Hz, 2H), 7.23 (d,  $J$  = 8.9 Hz, 2H), 7.33 (d,  $J$  = 2.4 Hz, 1H), 7.44 (d,  $J$  = 8.9 Hz, 1H);  $^{13}\text{C}$  NMR (100 MHz,  $\text{CDCl}_3$ )  $\delta$  55.5, 55.9, 104.8, 114.0 ( $\times 2$ ), 114.4, 115.8 ( $\times 2$ ), 124.0, 127.2, 128.4, 130.8 ( $\times 2$ ), 131.6, 131.9 ( $\times 2$ ), 135.4, 136.5, 139.9, 154.9, 157.5, 159.0; HRMS calcd for  $\text{C}_{22}\text{H}_{18}\text{O}_3\text{S}$  [ $\text{M}^+$ ], 362.0977, found 362.0990.

### Compound 5{10}<sup>5</sup>

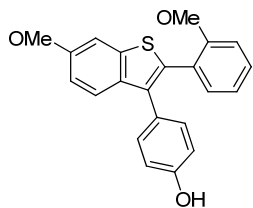

The product was obtained as pale yellow oil that solidified upon standing to an ivory solid (83% yield): mp 98-99 °C (uncorrected);  $^1\text{H}$  NMR (400 MHz,  $\text{CDCl}_3$ )  $\delta$  3.54 (s, 3H), 3.86 (s, 3H), 5.53 (br s, 1H), 6.74 (d,  $J$  = 8.5 Hz, 2H), 6.80-6.86 (m, 2H), 6.95 (dd,  $J$  = 2.3, 8.9 Hz, 1H), 7.12 (d,  $J$  = 8.5 Hz, 2H), 7.16-7.24 (m, 2H), 7.33 (d,  $J$  = 2.3 Hz, 1H), 7.56 (d,  $J$  = 8.9 Hz, 1H);  $^{13}\text{C}$  NMR (100 MHz,  $\text{CDCl}_3$ )  $\delta$  55.5, 55.9, 104.8, 111.4, 114.2, 115.3 ( $\times 2$ ), 120.6, 123.5, 124.0, 128.7, 129.5, 131.1 ( $\times 2$ ), 132.6, 132.8, 134.18, 134.20, 141.2, 154.7, 157.1, 157.4; HRMS calcd for  $\text{C}_{22}\text{H}_{18}\text{O}_3\text{S}$  [ $\text{M}^+$ ], 362.0977, found 362.0986.

### Compound 5{11}<sup>5</sup>

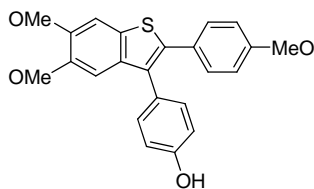

The product was obtained as a yellow solid (78% yield): mp 157-158 °C (uncorrected);  $^1\text{H}$  NMR (400 MHz,  $\text{CDCl}_3$ )  $\delta$  3.79 (s, 3H), 3.84 (s, 3H), 3.97 (s, 3H), 5.09 (br s, 1H), 6.78 (d,  $J$  = 8.8 Hz, 2H), 6.88 (d,  $J$  = 8.5 Hz, 2H), 6.97 (s, 1H), 7.20 (d,  $J$  = 8.5 Hz, 2H), 7.24 (d,  $J$  = 8.8 Hz, 2H), 7.29 (s, 1H);  $^{13}\text{C}$  NMR (100 MHz,  $\text{CDCl}_3$ )  $\delta$  55.5, 56.3, 56.4, 103.9, 104.7, 114.0 ( $\times 2$ ), 116.0 ( $\times 2$ ), 127.2, 128.5, 130.7 ( $\times 2$ ), 131.2, 131.8 ( $\times 2$ ), 134.8, 137.4, 148.4, 148.4, 155.0, 159.0; HRMS calcd for  $\text{C}_{24}\text{H}_{21}\text{O}_6\text{S}$  [ $\text{M}+\text{HCOO}^+$ ], 437.1059, found 437.1047.

### Compound 5{12}

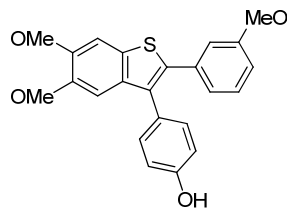

The product was obtained as a yellow solid (77% yield): mp 123-124.5 °C (uncorrected);  $^1\text{H}$  NMR (400 MHz,  $\text{CDCl}_3$ )  $\delta$  3.63 (s, 3H), 3.83 (s, 3H), 3.97 (s, 3H), 5.17 (br s, 1H), 6.76 (dd,  $J = 2.4, 8.2$  Hz, 1H), 6.80 (br s, 1H), 6.86-6.93 (m, 1H), 6.88 (d,  $J = 8.4$  Hz, 2H), 6.98 (s, 1H), 7.15 (t,  $J = 7.9$  Hz, 1H), 7.21 (d,  $J = 8.4$  Hz, 2H), 7.30 (s, 1H);  $^{13}\text{C}$  NMR (100 MHz,  $\text{CDCl}_3$ )  $\delta$  55.3, 56.3, 56.5, 104.1, 105.0, 113.7, 114.7, 116.0 ( $\times 2$ ), 116.4, 122.1, 128.5, 129.5, 131.6, 131.8 ( $\times 2$ ), 132.9, 134.8, 136.1, 148.6, 148.7, 155.2, 159.5; HRMS calcd for  $\text{C}_{23}\text{H}_{20}\text{O}_4\text{S}$  [ $\text{M}^+$ ], 392.1082, found 392.1084.

### Compound 5{13}

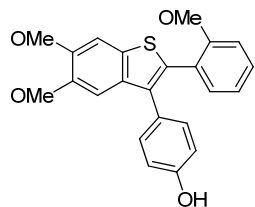

The product was obtained as a yellow oil (84% yield):  $^1\text{H}$  NMR (400 MHz,  $\text{CDCl}_3$ )  $\delta$  3.56 (s, 3H), 3.84 (s, 3H), 3.95 (s, 3H), 5.50 (br s, 1H), 6.76-6.88 (m, 4H), 7.12 (s, 1H), 7.14-7.28 (m, 4H), 7.30 (s, 1H);  $^{13}\text{C}$  NMR (100 MHz,  $\text{CDCl}_3$ )  $\delta$  55.5, 56.3, 56.4, 103.9, 104.7, 111.4, 115.4 ( $\times 2$ ), 120.5, 123.6, 128.9, 129.5, 131.0 ( $\times 2$ ), 132.5, 132.8, 133.47, 133.51, 134.3, 148.15, 148.22, 154.8, 157.1; HRMS calcd for  $\text{C}_{23}\text{H}_{20}\text{O}_4\text{S}$  [ $\text{M}^+$ ], 392.1082, found 392.1092.

### Compound 5{14}

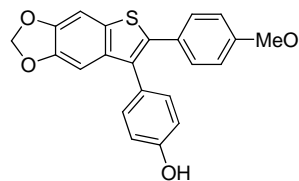

The product was obtained as pale yellow oil that solidified upon standing to an ivory solid (85% yield): mp 202-203 °C (uncorrected);  $^1\text{H}$  NMR (400 MHz,  $\text{CDCl}_3$ )  $\delta$  3.78 (s, 3H), 4.89 (br s, 1H), 5.99 (s, 2H), 6.77 (d,  $J = 9.0$  Hz, 2H), 6.86 (d,  $J = 8.6$  Hz, 2H), 6.94 (s, 1H), 7.17 (d,  $J = 8.6$  Hz, 2H), 7.19 (s, 1H), 7.21 (d,  $J = 9.0$  Hz, 2H);  $^{13}\text{C}$  NMR (100 MHz,  $\text{CDCl}_3$ )  $\delta$  55.5, 101.4, 101.5, 102.3, 114.0 ( $\times 2$ ), 115.5, 115.9 ( $\times 2$ ), 127.1, 128.4, 130.6 ( $\times 2$ ), 131.8 ( $\times 2$ ), 132.0, 136.0, 137.6, 146.6, 146.9,

155.0, 159.1; HRMS calcd for C<sub>22</sub>H<sub>16</sub>O<sub>4</sub>S [M<sup>+</sup>], 376.0769, found 376.0777.

### Compound 5{15}

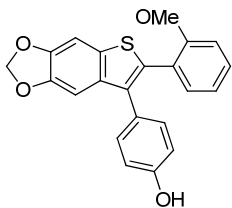

The product was obtained as a pale yellow oil (87% yield): <sup>1</sup>H NMR (400 MHz, CDCl<sub>3</sub>) δ 3.55 (s, 3H), 5.48 (br s, 1H), 5.96 (s, 2H), 6.75 (d, *J* = 7.9 Hz, 2H), 6.77-6.87 (m, 2H), 7.08 (s, 1H), 7.11 (d, *J* = 7.9 Hz, 2H), 7.16-7.26 (m, 2H), 7.23 (s, 1H); <sup>13</sup>C NMR (100 MHz, CDCl<sub>3</sub>) δ 55.5, 101.4, 101.5, 102.3, 111.4, 115.3 (×2), 120.5, 123.5, 128.7, 129.5, 131.1 (×2), 132.7, 133.3, 133.6, 134.5, 134.6, 146.5, 146.7, 154.7, 157.0; HRMS calcd for C<sub>44</sub>H<sub>36</sub>ONO<sub>8</sub>S<sub>2</sub> [2M+NH<sub>4</sub><sup>+</sup>], 770.1882, found 770.1857.

### ◆ General Procedure for the Mitsunobu reaction to prepare compounds 6

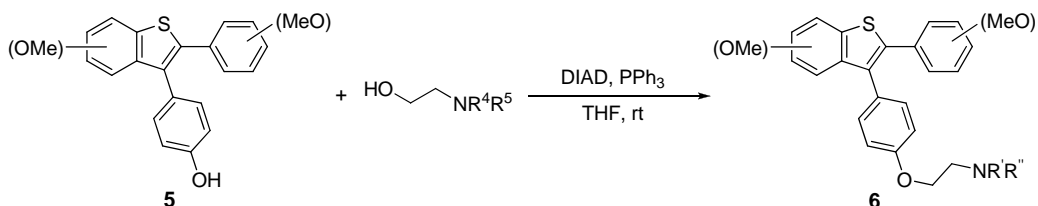

To a solution of **5** (0.2 mmol), PPh<sub>3</sub> (0.4 mmol), and the alkylaminoethanol (0.3 mmol) in anhydrous THF (2 mL) was added diisopropyl azodicarboxylate (DIAD) (0.3 mmol) with stirring at 0-5 °C. The resulting solution was stirred at room temperature for *ca.* 24-32 h (monitored by TLC until completion) and concentrated *in vacuo*. The crude product was purified by column chromatography on silica gel using methanol/ethyl acetate/hexanes as the eluent to afford the corresponding products **6**.

### Compound 6{1}

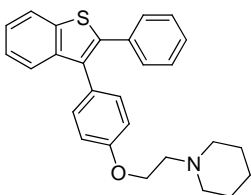

The product was obtained as a pale yellow oil (83% yield): <sup>1</sup>H NMR (400 MHz, CDCl<sub>3</sub>) δ 1.41-1.50 (m, 2H), 1.59-1.66 (m, 4H), 2.53 (br s, 4H), 2.80 (t, *J* = 6.0 Hz, 2H), 4.14 (t, *J* = 6.0 Hz, 2H), 6.94 (d,

$J = 8.8$  Hz, 2H), 7.20-7.25 (m, 4H), 7.31-7.34 (m, 3H), 7.43-7.56 (m, 3H), 7.83-7.88 (m, 1H);  $^{13}\text{C}$  NMR (100 MHz,  $\text{CDCl}_3$ )  $\delta$  24.4, 26.2 ( $\times 2$ ), 55.3 ( $\times 2$ ), 58.2, 66.2, 114.9, 122.2, 123.5, 124.5, 124.6, 128.6 ( $\times 2$ ), 128.7 ( $\times 2$ ), 132.2 ( $\times 2$ ), 132.3 ( $\times 2$ ), 133.0, 133.2, 134.6, 138.9, 139.2, 141.2, 158.3; HRMS calcd for  $\text{C}_{27}\text{H}_{28}\text{NOS}$  [ $\text{M}+\text{H}^+$ ], 414.1892, found 414.1894.

#### Compound 6{2}

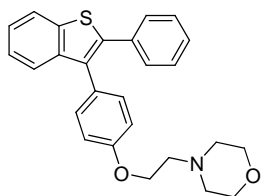

The product was obtained as a pale yellow oil (78% yield):  $^1\text{H}$  NMR (400 MHz,  $\text{CDCl}_3$ )  $\delta$  2.60 (t,  $J = 4.4$  Hz, 4H), 2.83 (t,  $J = 5.7$  Hz, 2H), 3.75 (t,  $J = 4.6$  Hz, 4H), 4.14 (t,  $J = 5.7$  Hz, 2H), 6.93 (d,  $J = 8.7$  Hz, 2H), 7.20-7.23 (m, 2H), 7.29-7.34 (m, 3H), 7.42-7.54 (m, 3H), 7.63-7.70 (m, 2H), 7.85-7.88 (m, 1H);  $^{13}\text{C}$  NMR (100 MHz,  $\text{CDCl}_3$ )  $\delta$  54.3 ( $\times 2$ ), 57.9, 66.0, 67.1 ( $\times 2$ ), 114.9 ( $\times 2$ ), 122.2, 123.5, 124.5, 124.6, 127.8, 128.5 ( $\times 2$ ), 128.6, 128.7, 129.8 ( $\times 2$ ), 131.7 ( $\times 2$ ), 134.5, 138.9, 139.3, 141.2, 158.2; HRMS calcd for  $\text{C}_{26}\text{H}_{26}\text{NO}_2\text{S}$  [ $\text{M}+\text{H}^+$ ], 416.1684, found 416.1682.

#### Compound 6{4}

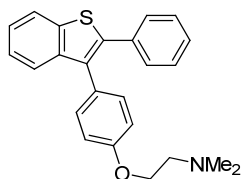

The product was obtained as a pale yellow oil (79% yield):  $^1\text{H}$  NMR (400 MHz,  $\text{CDCl}_3$ )  $\delta$  2.36 (s, 6H), 2.76 (t,  $J = 5.8$  Hz, 2H), 4.10 (t,  $J = 5.8$  Hz, 2H), 6.96 (d,  $J = 8.6$  Hz, 2H), 7.22-7.26 (m, 4H), 7.30-7.35 (m, 4H), 7.58-7.70 (m, 2H), 7.85-7.88 (m, 1H);  $^{13}\text{C}$  NMR (100 MHz,  $\text{CDCl}_3$ )  $\delta$  46.2 ( $\times 2$ ), 58.6, 66.2, 115.0 ( $\times 2$ ), 122.3, 123.6, 124.6, 124.7, 127.8, 128.5 ( $\times 2$ ), 129.8 ( $\times 2$ ), 131.7 ( $\times 2$ ), 132.3, 133.1, 134.6, 139.0, 139.3, 141.3, 158.4; HRMS calcd for  $\text{C}_{24}\text{H}_{24}\text{NOS}$  [ $\text{M}+\text{H}^+$ ], 374.1579, found 374.1576.

#### Compound 6{5}

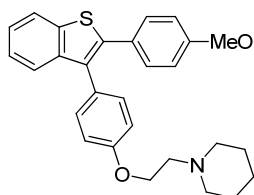

The product was obtained as a pale yellow oil (83% yield):  $^1\text{H}$  NMR (400 MHz,  $\text{CDCl}_3$ )  $\delta$  1.39-1.50 (m, 2H), 1.55-1.66 (m, 4H), 2.50-2.58 (m, 4H), 2.81 (t,  $J = 6.0$  Hz, 2H), 3.79 (s, 3H), 4.15 (t,  $J = 6.0$  Hz, 2H), 6.79 (d,  $J = 8.8$  Hz, 2H), 6.94 (d,  $J = 8.6$  Hz, 2H), 7.21-7.27 (m, 4H), 7.30-7.34 (m, 2H), 7.54-7.58 (m, 1H), 7.82-7.86 (m, 1H);  $^{13}\text{C}$  NMR (100 MHz,  $\text{CDCl}_3$ )  $\delta$  24.4, 26.2 ( $\times 2$ ), 55.3 ( $\times 2$ ), 55.4, 58.3, 66.2, 114.0 ( $\times 2$ ), 115.0, 122.2, 123.3, 124.4, 124.5, 127.0, 128.1, 130.9 ( $\times 2$ ), 131.7 ( $\times 2$ ), 132.4, 138.7, 139.2, 141.4, 158.3, 159.3; HRMS calcd for  $\text{C}_{28}\text{H}_{29}\text{NO}_2\text{S}$  [ $\text{M}^+$ ], 443.1919, found 443.1911.

### Compound 6{6}

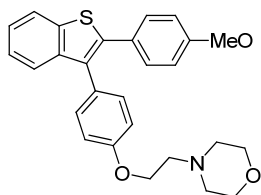

The product was obtained as a pale yellow oil (73% yield):  $^1\text{H}$  NMR (400 MHz,  $\text{CDCl}_3$ )  $\delta$  2.61 (t,  $J = 4.6$  Hz, 4H), 2.84 (t,  $J = 5.8$  Hz, 2H), 3.76 (t,  $J = 4.6$  Hz, 4H), 3.78 (s, 3H), 4.15 (t,  $J = 5.8$  Hz, 2H), 6.79 (d,  $J = 8.8$  Hz, 2H), 6.95 (d,  $J = 8.7$  Hz, 2H), 7.23-7.26 (m, 4H), 7.29-7.34 (m, 2H), 7.55-7.58 (m, 1H), 7.83-7.86 (m, 1H);  $^{13}\text{C}$  NMR (100 MHz,  $\text{CDCl}_3$ )  $\delta$  54.3 ( $\times 2$ ), 55.4, 57.9, 66.0, 67.1 ( $\times 2$ ), 114.0 ( $\times 2$ ), 114.9 ( $\times 2$ ), 122.2, 123.3, 124.4, 124.5, 126.9, 128.2, 130.9 ( $\times 2$ ), 131.7 ( $\times 2$ ), 133.2, 138.6, 139.2, 141.3, 158.1, 159.3; HRMS calcd for  $\text{C}_{27}\text{H}_{27}\text{NO}_3\text{S}$  [ $\text{M}^+$ ], 445.1712, found 445.1716.

### Compound 6{7}

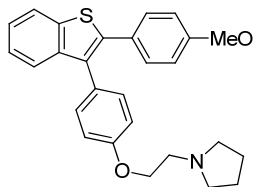

The product was obtained as a pale yellow oil (85% yield):  $^1\text{H}$  NMR (400 MHz,  $\text{CDCl}_3$ )  $\delta$  1.83 (br s, 4H), 2.62-2.70 (m, 4H), 2.95 (t,  $J = 6.0$  Hz, 2H), 3.78 (s, 3H), 4.15 (t,  $J = 6.0$  Hz, 2H), 6.79 (d,  $J = 8.9$  Hz, 2H), 6.95 (d,  $J = 8.7$  Hz, 2H), 7.23 (d,  $J = 8.7$  Hz, 2H), 7.26 (d,  $J = 8.9$  Hz, 2H), 7.29-7.34 (m, 2H), 7.54-7.58 (m, 1H), 7.82-7.86 (m, 1H);  $^{13}\text{C}$  NMR (100 MHz,  $\text{CDCl}_3$ )  $\delta$  23.7 ( $\times 2$ ), 55.0 ( $\times 2$ ), 55.3, 55.4, 67.2, 114.0 ( $\times 2$ ), 115.0 ( $\times 2$ ), 122.2, 123.3, 124.4, 124.5, 127.0, 128.1, 130.9 ( $\times 2$ ), 131.7 ( $\times 2$ ), 132.2, 138.6, 139.2, 141.4, 158.3, 159.3; HRMS calcd for  $\text{C}_{27}\text{H}_{27}\text{NO}_2\text{S}$  [ $\text{M}^+$ ], 429.1762, found 429.1765.



### Compound 6{8}

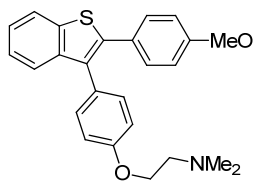

The product was obtained as a pale yellow oil (81% yield):  $^1\text{H}$  NMR (400 MHz,  $\text{CDCl}_3$ )  $\delta$  2.36 (s, 6H), 2.76 (t,  $J = 6.0$  Hz, 2H), 3.78 (s, 3H), 4.10 (t,  $J = 6.0$  Hz, 2H), 6.78 (d,  $J = 8.8$  Hz, 2H), 6.96 (d,  $J = 8.6$  Hz, 2H), 7.21-7.27 (m, 4H), 7.30-7.34 (m, 2H), 7.54-7.58 (m, 1H), 7.82-7.86 (m, 1H);  $^{13}\text{C}$  NMR (100 MHz,  $\text{CDCl}_3$ )  $\delta$  46.2 ( $\times 2$ ), 55.4, 58.6, 66.2, 114.0 ( $\times 2$ ), 114.9 ( $\times 2$ ), 122.1, 123.3, 124.4, 124.5, 127.0, 128.1, 130.9 ( $\times 2$ ), 131.6 ( $\times 2$ ), 132.1, 138.6, 139.1, 141.3, 158.3, 159.2; HRMS calcd for  $\text{C}_{25}\text{H}_{25}\text{NO}_2\text{S}$  [ $\text{M}^+$ ], 403.1606, found 403.1611.

### Compound 6{9}

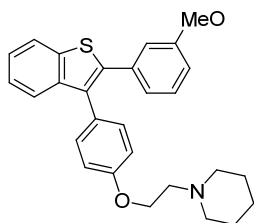

The product was obtained as a pale yellow oil (78% yield):  $^1\text{H}$  NMR (400 MHz,  $\text{CDCl}_3$ )  $\delta$  1.41-1.50 (m, 2H), 1.59-1.66 (m, 4H), 2.50-2.56 (m, 4H), 2.80 (t,  $J = 6.1$  Hz, 2H), 3.63 (s, 3H), 4.14 (t,  $J = 6.1$  Hz, 2H), 6.78 (dd,  $J = 2.4, 8.2$  Hz, 1H), 6.86 (t,  $J = 2.2$  Hz, 1H), 6.95-6.97 (m, 1H), 6.95 (d,  $J = 8.6$  Hz, 2H), 7.17 (t,  $J = 7.9$  Hz, 1H), 7.25 (d,  $J = 8.6$  Hz, 2H), 7.31-7.37 (m, 2H), 7.57-7.62 (m, 1H), 7.84-7.88 (m, 1H);  $^{13}\text{C}$  NMR (100 MHz,  $\text{CDCl}_3$ )  $\delta$  24.4, 26.2 ( $\times 2$ ), 55.2, 55.3 ( $\times 2$ ), 58.2, 66.3, 114.0, 114.8, 115.0 ( $\times 2$ ), 122.2, 122.3, 123.5, 124.6, 124.7, 128.0, 129.5, 131.6 ( $\times 2$ ), 133.3, 135.8, 138.9, 139.1, 141.3, 158.4, 159.5; HRMS calcd for  $\text{C}_{28}\text{H}_{29}\text{NO}_2\text{S}$  [ $\text{M}^+$ ], 443.1919, found 443.1916.

### Compound 6{10}

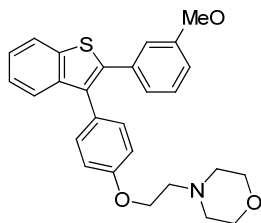

The product was obtained as a pale yellow oil (73% yield):  $^1\text{H}$  NMR (400 MHz,  $\text{CDCl}_3$ )  $\delta$  2.61 (br s, 4H), 2.84 (t,  $J = 5.7$  Hz, 2H), 3.64 (s, 3H), 3.76 (t,  $J = 4.4$  Hz, 4H), 4.15 (t,  $J = 5.7$  Hz, 2H), 6.79 (dd,  $J$

= 2.4, 8.2 Hz, 1H), 6.86 (br s, 1H), 6.93-6.97 (m, 1H), 6.95 (d,  $J = 8.6$  Hz, 2H), 7.17 (t,  $J = 8.0$  Hz, 1H), 7.26 (d,  $J = 8.6$  Hz, 2H), 7.30-7.36 (m, 2H), 7.56-7.61 (m, 1H), 7.83-7.88 (m, 1H);  $^{13}\text{C}$  NMR (100 MHz,  $\text{CDCl}_3$ )  $\delta$  54.4 ( $\times 2$ ), 55.3, 57.9, 66.1, 67.2 ( $\times 2$ ), 113.9, 114.9, 115.0 ( $\times 2$ ), 122.2, 122.3, 123.5, 124.6, 124.7, 128.2, 129.5, 131.7 ( $\times 2$ ), 133.2, 135.8, 138.9, 139.1, 141.2, 158.3, 159.5.

#### Compound 6{11}

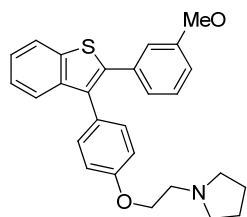

The product was obtained as a pale yellow oil (76% yield):  $^1\text{H}$  NMR (400 MHz,  $\text{CDCl}_3$ )  $\delta$  1.80-1.85 (m, 4H), 2.61-2.68 (m, 4H), 2.93 (t,  $J = 6.0$  Hz, 2H), 3.63 (s, 3H), 4.14 (t,  $J = 6.0$  Hz, 2H), 6.78 (dd,  $J = 2.4, 8.2$  Hz, 1H), 6.86 (br s, 1H), 6.93-6.97 (m, 1H), 6.95 (d,  $J = 8.6$  Hz, 2H), 7.17 (t,  $J = 8.0$  Hz, 1H), 7.25 (d,  $J = 8.6$  Hz, 2H), 7.30-7.36 (m, 2H), 7.56-7.61 (m, 1H), 7.83-7.88 (m, 1H);  $^{13}\text{C}$  NMR (100 MHz,  $\text{CDCl}_3$ )  $\delta$  23.7 ( $\times 2$ ), 55.0 ( $\times 2$ ), 55.2, 55.4, 67.3, 114.0, 114.8, 115.0 ( $\times 2$ ), 122.20, 122.23, 123.6, 124.6, 124.7, 128.0, 129.5, 131.6 ( $\times 2$ ), 133.2, 135.8, 138.9, 139.1, 141.3, 158.4, 159.4.

#### Compound 6{12}

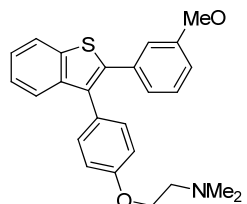

The product was obtained as a pale yellow oil (69% yield):  $^1\text{H}$  NMR (400 MHz,  $\text{CDCl}_3$ )  $\delta$  2.36 (s, 6H), 2.76 (t,  $J = 5.7$  Hz, 2H), 3.62 (s, 3H), 4.10 (t,  $J = 5.7$  Hz, 2H), 6.78 (dd,  $J = 2.5, 8.2$  Hz, 1H), 6.86 (br s, 1H), 6.93-6.97 (m, 1H), 6.96 (d,  $J = 8.6$  Hz, 2H), 7.16 (t,  $J = 8.0$  Hz, 1H), 7.25 (d,  $J = 8.6$  Hz, 2H), 7.30-7.36 (m, 2H), 7.56-7.61 (m, 1H), 7.83-7.88 (m, 1H);  $^{13}\text{C}$  NMR (100 MHz,  $\text{CDCl}_3$ )  $\delta$  46.1 ( $\times 2$ ), 55.2, 58.5, 66.2, 114.0, 114.8, 115.0 ( $\times 2$ ), 122.19, 122.22, 123.5, 124.5, 124.7, 128.0, 129.5, 131.6 ( $\times 2$ ), 133.2, 135.8, 138.8, 139.1, 141.2, 158.4, 159.4.

#### Compound 6{13}

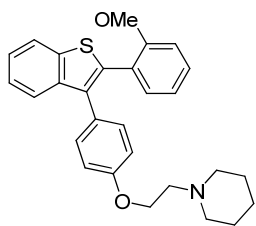

The product was obtained as a pale yellow oil (76% yield):  $^1\text{H}$  NMR (400 MHz,  $\text{CDCl}_3$ )  $\delta$  1.40-1.48 (m, 2H), 1.57-1.65 (m, 4H), 2.48-2.54 (m, 4H), 2.77 (t,  $J = 6.1$  Hz, 2H), 3.57 (s, 3H), 4.10 (t,  $J = 6.1$  Hz, 2H), 6.81-6.90 (m, 4H), 7.17-7.28 (m, 4H), 7.31-7.34 (m, 2H), 7.68-7.72 (m, 1H), 7.83-7.87 (m, 1H);  $^{13}\text{C}$  NMR (100 MHz,  $\text{CDCl}_3$ )  $\delta$  24.4, 26.1 ( $\times 2$ ), 55.3 ( $\times 2$ ), 55.5, 58.2, 66.2, 111.4, 114.5 ( $\times 2$ ), 120.5, 122.2, 123.3, 123.5, 124.2, 124.3, 128.7, 129.7, 131.0 ( $\times 2$ ), 132.8, 134.7, 135.5, 139.9, 140.1, 157.3, 158.0; HRMS calcd for  $\text{C}_{28}\text{H}_{29}\text{NO}_2\text{S}$  [ $\text{M}^+$ ], 443.1919, found 443.1917.

### Compound 6{15}

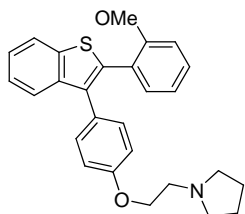

The product was obtained as a pale yellow oil (67% yield):  $^1\text{H}$  NMR (400 MHz,  $\text{CDCl}_3$ )  $\delta$  1.75-1.85 (m, 4H), 2.60-2.66 (m, 4H), 2.93 (t,  $J = 6.0$  Hz, 2H), 3.56 (s, 3H), 4.10 (t,  $J = 6.0$  Hz, 2H), 6.81-6.90 (m, 2H), 6.87 (d,  $J = 8.8$  Hz, 2H), 7.20-7.29 (m, 2H), 7.21 (d,  $J = 8.8$  Hz, 2H), 7.31-7.34 (m, 2H), 7.68-7.72 (m, 1H), 7.83-7.87 (m, 1H);  $^{13}\text{C}$  NMR (100 MHz,  $\text{CDCl}_3$ )  $\delta$  23.7 ( $\times 2$ ), 54.9 ( $\times 2$ ), 55.3, 55.5, 67.2, 111.4, 114.5 ( $\times 2$ ), 120.6, 122.2, 123.3, 123.5, 124.2, 124.3, 128.6, 129.7, 131.0 ( $\times 2$ ), 132.8, 134.7, 135.5, 139.9, 140.1, 157.3, 158.0.

### Compound 6{16}

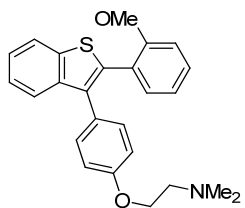

The product was obtained as a pale yellow oil (71% yield):  $^1\text{H}$  NMR (400 MHz,  $\text{CDCl}_3$ )  $\delta$  2.34 (s, 6H), 2.73 (t,  $J = 5.8$  Hz, 2H), 3.56 (s, 3H), 4.05 (t,  $J = 5.8$  Hz, 2H), 6.81-6.90 (m, 2H), 6.87 (d,  $J = 8.8$  Hz, 2H), 7.20-7.29 (m, 2H), 7.21 (d,  $J = 8.8$  Hz, 2H), 7.31-7.34 (m, 2H), 7.68-7.72 (m, 1H), 7.83-7.87 (m, 1H);  $^{13}\text{C}$  NMR (100 MHz,  $\text{CDCl}_3$ )  $\delta$  46.1 ( $\times 2$ ), 55.5, 58.5, 66.1, 111.4, 114.5 ( $\times 2$ ), 120.6,

122.2, 123.3, 123.5, 124.26, 124.34, 128.7, 129.7, 131.0 (×2), 132.8, 134.7, 135.5, 139.9, 140.1, 157.3, 158.0.

### Compound 6{17}<sup>5</sup>

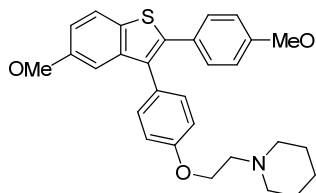

The product was obtained as a pale yellow oil (87% yield): <sup>1</sup>H NMR (400 MHz, CDCl<sub>3</sub>) δ 1.41-1.50 (m, 2H), 1.59-1.66 (m, 4H), 2.50-2.58 (m, 4H), 2.81 (t, *J* = 6.0 Hz, 2H), 3.779 (s, 3H), 3.780 (s, 3H), 4.15 (t, *J* = 6.0 Hz, 2H), 6.78 (d, *J* = 8.8 Hz, 2H), 6.95 (d, *J* = 8.8 Hz, 2H), 6.95-7.03 (m, 2H), 7.20-7.27 (m, 4H), 7.70 (d, *J* = 8.6 Hz, 1H); <sup>13</sup>C NMR (100 MHz, CDCl<sub>3</sub>) δ 24.4, 26.2 (×2), 55.3 (×2), 55.4, 55.8, 58.3, 66.1, 105.7, 114.0 (×2), 114.4, 115.0 (×2), 122.9, 127.1, 128.2, 130.8 (×2), 131.0, 131.6 (×2), 132.0, 140.6, 142.4, 157.8, 158.2, 159.2; HRMS calcd for C<sub>29</sub>H<sub>32</sub>NO<sub>3</sub>S [M+H<sup>+</sup>], 474.2103, found 474.2050.

### Compound 6{19}

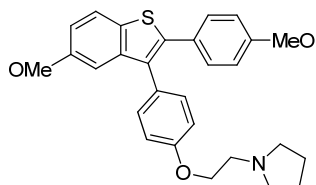

The product was obtained as a pale yellow oil (81% yield): <sup>1</sup>H NMR (400 MHz, CDCl<sub>3</sub>) δ 1.78-1.86 (m, 4H), 2.63-2.68 (m, 4H), 2.95 (t, *J* = 5.7 Hz, 2H), 3.779 (s, 3H), 3.780 (s, 3H), 4.16 (t, *J* = 5.7 Hz, 2H), 6.78 (d, *J* = 8.8 Hz, 2H), 6.93-7.03 (m, 4H), 7.20-7.25 (m, 4H), 7.70 (d, *J* = 8.7 Hz, 1H); <sup>13</sup>C NMR (100 MHz, CDCl<sub>3</sub>) δ 23.7 (×2), 55.0 (×2), 55.35, 55.38, 55.7, 67.2, 105.8, 114.0 (×2), 114.3, 115.0 (×2), 122.8, 127.1, 128.2, 130.8 (×2), 131.0, 131.6 (×2), 132.0, 140.6, 142.4, 157.8, 158.3, 159.2; HRMS calcd for C<sub>28</sub>H<sub>29</sub>NO<sub>3</sub>S [M<sup>+</sup>], 459.1868, found 459.1876.

### Compound 6{20}

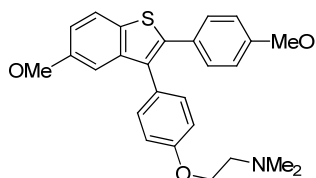

The product was obtained as a pale yellow oil (81% yield): <sup>1</sup>H NMR (400 MHz, CDCl<sub>3</sub>) δ 2.37 (s,

6H), 2.77 (t,  $J = 5.7$  Hz, 2H), 3.769 (s, 3H), 3.770 (s, 3H), 4.10 (t,  $J = 5.7$  Hz, 2H), 6.77 (d,  $J = 8.8$  Hz, 2H), 6.95 (d,  $J = 8.8$  Hz, 2H), 6.95-7.03 (m, 2H), 7.20-7.25 (m, 4H), 7.69 (d,  $J = 8.7$  Hz, 1H);  $^{13}\text{C}$  NMR (100 MHz,  $\text{CDCl}_3$ )  $\delta$  46.2 ( $\times 2$ ), 55.4, 55.7, 58.6, 66.2, 105.8, 114.0 ( $\times 2$ ), 114.3, 115.0 ( $\times 2$ ), 122.8, 127.1, 128.2, 130.8 ( $\times 2$ ), 131.0, 131.6 ( $\times 2$ ), 132.0, 140.6, 142.4, 157.8, 158.2, 159.3.

#### Compound 6{21}<sup>5</sup>

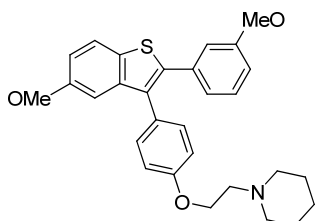

The product was obtained as a pale yellow oil (86% yield):  $^1\text{H}$  NMR (400 MHz,  $\text{CDCl}_3$ )  $\delta$  1.41-1.49 (m, 2H), 1.59-1.66 (m, 4H), 2.50-2.58 (m, 4H), 2.81 (t,  $J = 6.0$  Hz, 2H), 3.63 (s, 3H), 3.78 (s, 3H), 4.15 (t,  $J = 6.0$  Hz, 2H), 6.76-6.84 (m, 2H), 6.90-6.95 (m, 1H), 6.95 (d,  $J = 8.7$  Hz, 2H), 6.98-7.04 (m, 2H), 7.16 (t,  $J = 8.0$  Hz, 1H), 7.24 (d,  $J = 8.7$  Hz, 2H), 7.72 (d,  $J = 8.6$  Hz, 1H);  $^{13}\text{C}$  NMR (100 MHz,  $\text{CDCl}_3$ )  $\delta$  24.4, 26.2 ( $\times 2$ ), 55.25, 55.33 ( $\times 2$ ), 55.8, 58.2, 66.2, 105.8, 114.0, 114.7, 114.8, 115.1 ( $\times 2$ ), 122.1, 123.0, 128.1, 129.5, 131.6 ( $\times 2$ ), 132.3, 133.0, 135.9, 140.5, 142.3, 157.9, 158.4, 159.4; HRMS calcd for  $\text{C}_{29}\text{H}_{31}\text{NO}_3\text{S}$  [ $\text{M}^+$ ], 473.2025, found 473.2031.

#### Compound 6{23}

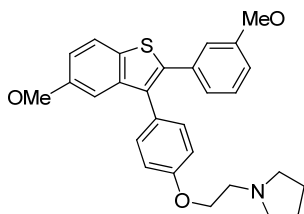

The product was obtained as a pale yellow oil (71% yield):  $^1\text{H}$  NMR (400 MHz,  $\text{CDCl}_3$ )  $\delta$  1.81-1.85 (m, 4H), 2.63-2.68 (m, 4H), 2.94 (t,  $J = 6.0$  Hz, 2H), 3.62 (s, 3H), 3.78 (s, 3H), 4.15 (t,  $J = 6.0$  Hz, 2H), 6.76-6.87 (m, 2H), 6.90-7.05 (m, 3H), 6.97 (d,  $J = 8.7$  Hz, 2H), 7.16 (t,  $J = 7.8$  Hz, 1H), 7.25 (d,  $J = 8.7$  Hz, 2H), 7.72 (d,  $J = 8.6$  Hz, 1H);  $^{13}\text{C}$  NMR (100 MHz,  $\text{CDCl}_3$ )  $\delta$  23.7 ( $\times 2$ ), 55.0 ( $\times 2$ ), 55.2, 55.3, 55.7, 67.3, 105.8, 114.0, 114.7, 114.8, 115.1 ( $\times 2$ ), 122.1, 122.9, 128.1, 129.5, 131.2, 131.5 ( $\times 2$ ), 133.0, 135.9, 140.4, 142.3, 157.9, 158.4, 159.4.

#### Compound 6{24}

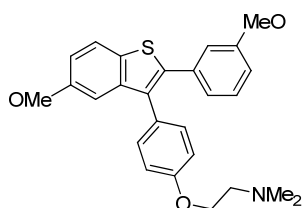

The product was obtained as a pale yellow oil (82% yield):  $^1\text{H}$  NMR (400 MHz,  $\text{CDCl}_3$ )  $\delta$  2.36 (s, 6H), 2.76 (t,  $J = 5.7$  Hz, 2H), 3.62 (s, 3H), 3.77 (s, 3H), 4.10 (t,  $J = 5.7$  Hz, 2H), 6.75-6.83 (m, 1H), 6.83 (br s, 1H), 6.90-7.04 (m, 3H), 6.96 (d,  $J = 8.7$  Hz, 2H), 7.15 (t,  $J = 7.9$  Hz, 1H), 7.25 (d,  $J = 8.7$  Hz, 2H), 7.71 (d,  $J = 8.6$  Hz, 1H);  $^{13}\text{C}$  NMR (100 MHz,  $\text{CDCl}_3$ )  $\delta$  46.1 ( $\times 2$ ), 55.2, 55.7, 58.5, 66.3, 105.9, 114.0, 114.7, 114.8, 115.1 ( $\times 2$ ), 122.1, 122.9, 128.2, 129.5, 131.3, 131.5 ( $\times 2$ ), 133.0, 135.9, 140.5, 142.3, 157.9, 158.4, 159.4; HRMS calcd for  $\text{C}_{26}\text{H}_{28}\text{NO}_3\text{S}$  [ $\text{M}+\text{H}^+$ ], 434.1790, found 434.1790.

### Compound 6{25}<sup>5</sup>

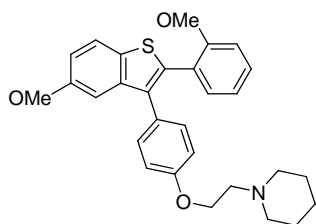

The product was obtained as a pale yellow oil (87% yield):  $^1\text{H}$  NMR (400 MHz,  $\text{CDCl}_3$ )  $\delta$  1.40-1.49 (m, 2H), 1.55-1.65 (m, 4H), 2.50-2.55 (m, 4H), 2.78 (t,  $J = 6.1$  Hz, 2H), 3.56 (s, 3H), 3.80 (s, 3H), 4.10 (t,  $J = 6.1$  Hz, 2H), 6.81-6.89 (m, 4H), 7.00 (dd,  $J = 2.5, 8.7$  Hz, 1H), 7.15-7.27 (m, 5H), 7.72 (d,  $J = 8.7$  Hz, 1H);  $^{13}\text{C}$  NMR (100 MHz,  $\text{CDCl}_3$ )  $\delta$  24.4, 26.1 ( $\times 2$ ), 55.3 ( $\times 2$ ), 55.5, 55.8, 58.2, 66.2, 105.8, 111.4, 114.4, 114.6 ( $\times 2$ ), 120.5, 122.9, 123.6, 128.8, 129.7, 130.9 ( $\times 2$ ), 132.3, 132.8, 134.6, 136.9, 141.1, 157.2, 157.8, 158.0; HRMS calcd for  $\text{C}_{29}\text{H}_{32}\text{NO}_3\text{S}$  [ $\text{M}+\text{H}^+$ ], 474.2103, found 474.2095.

### Compound 6{27}

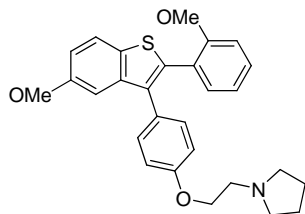

The product was obtained as a pale yellow oil (83% yield):  $^1\text{H}$  NMR (400 MHz,  $\text{CDCl}_3$ )  $\delta$  1.80-1.85 (br s, 4H), 2.61-2.66 (m, 4H), 2.91 (t,  $J = 6.0$  Hz, 2H), 3.56 (s, 3H), 3.80 (s, 3H), 4.10 (t,  $J = 6.0$  Hz, 2H), 6.81-6.90 (m, 4H), 7.00 (dd,  $J = 2.5, 8.7$  Hz, 1H), 7.15-7.27 (m, 5H), 7.72 (d,  $J = 8.7$  Hz, 1H);  $^{13}\text{C}$  NMR (100 MHz,  $\text{CDCl}_3$ )  $\delta$  23.7 ( $\times 2$ ), 55.0 ( $\times 2$ ), 55.4, 55.5, 55.8, 67.2, 105.7, 111.4, 114.4,

114.5 (×2), 115.5, 120.5, 122.9, 128.7, 129.7, 130.9 (×2), 132.3, 132.8, 134.6, 136.8, 141.1, 157.1, 157.7, 157.9; HRMS calcd for C<sub>28</sub>H<sub>30</sub>NO<sub>3</sub>S [M+H<sup>+</sup>], 460.1946, found 460.1946.

### Compound 6{28}

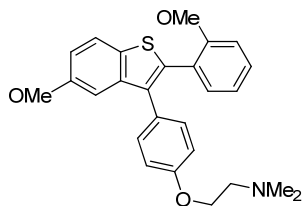

The product was obtained as a pale yellow oil (83% yield): <sup>1</sup>H NMR (400 MHz, CDCl<sub>3</sub>) δ 2.34 (s, 6H), 2.72 (t, *J* = 5.7 Hz, 2H), 3.54 (s, 3H), 3.79 (s, 3H), 4.05 (t, *J* = 5.7 Hz, 2H), 6.80-6.89 (m, 4H), 6.99 (dd, *J* = 2.5, 8.7 Hz, 1H), 7.15-7.27 (m, 5H), 7.71 (d, *J* = 8.7 Hz, 1H); <sup>13</sup>C NMR (100 MHz, CDCl<sub>3</sub>) δ 46.1 (×2), 55.5, 55.8, 58.6, 66.1, 105.7, 111.4, 114.4, 114.5 (×2), 120.5, 122.9, 123.6, 128.8, 129.6, 130.8 (×2), 132.3, 132.7, 134.5, 136.8, 141.1, 157.1, 157.7, 157.9; HRMS calcd for C<sub>26</sub>H<sub>27</sub>NO<sub>3</sub>S [M<sup>+</sup>], 433.1712, found 433.1720.

### Compound 6{29}<sup>5</sup>

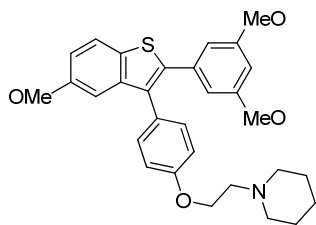

The product was obtained as a pale yellow oil (77% yield): <sup>1</sup>H NMR (400 MHz, CDCl<sub>3</sub>) δ 1.41-1.50 (m, 2H), 1.60-1.66 (m, 4H), 2.50-2.58 (m, 4H), 2.80 (t, *J* = 6.0 Hz, 2H), 3.62 (s, 6H), 3.78 (s, 3H), 4.14 (t, *J* = 6.0 Hz, 2H), 6.34 (t, *J* = 2.2 Hz, 1H), 6.47 (d, *J* = 2.2 Hz, 2H), 6.96 (d, *J* = 8.8 Hz, 2H), 6.98-7.04 (m, 2H), 7.25 (d, *J* = 8.8 Hz, 2H), 7.71 (d, *J* = 8.5 Hz, 1H); <sup>13</sup>C NMR (100 MHz, CDCl<sub>3</sub>) δ 24.4, 26.2 (×2), 55.3 (×2), 55.4 (×2), 55.7, 58.2, 66.3, 100.5, 105.9, 107.7 (×2), 114.8, 115.1 (×2), 122.9, 128.2, 131.2, 131.5 (×2), 133.2, 136.4, 140.5, 142.3, 157.9, 158.4, 160.6 (×2); HRMS calcd for C<sub>30</sub>H<sub>33</sub>NO<sub>4</sub>S [M<sup>+</sup>], 503.2130, found 503.2132.

### Compound 6{30}

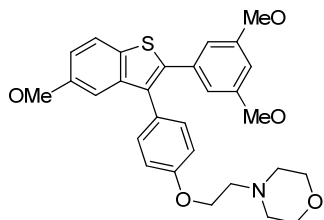

The product was obtained as a pale yellow oil (78% yield):  $^1\text{H}$  NMR (400 MHz,  $\text{CDCl}_3$ )  $\delta$  2.58-2.64 (m, 4H), 2.84 (t,  $J = 5.7$  Hz, 2H), 3.63 (s, 6H), 3.76 (t,  $J = 4.6$  Hz, 4H), 3.78 (s, 3H), 4.15 (t,  $J = 5.7$  Hz, 2H), 6.34 (t,  $J = 2.2$  Hz, 1H), 6.47 (d,  $J = 2.2$  Hz, 2H), 6.96 (d,  $J = 8.6$  Hz, 2H), 6.96-7.04 (m, 2H), 7.26 (d,  $J = 8.6$  Hz, 2H), 7.72 (d,  $J = 8.5$  Hz, 1H);  $^{13}\text{C}$  NMR (100 MHz,  $\text{CDCl}_3$ )  $\delta$  54.4 ( $\times 2$ ), 55.4 ( $\times 2$ ), 55.8, 57.9, 66.1, 67.2 ( $\times 2$ ), 100.5, 106.0, 107.7 ( $\times 2$ ), 114.8, 115.1 ( $\times 2$ ), 123.0, 128.4, 131.2, 131.6 ( $\times 2$ ), 133.1, 136.4, 140.6, 142.3, 157.9, 158.3, 160.6 ( $\times 2$ ).

### Compound 6{31}

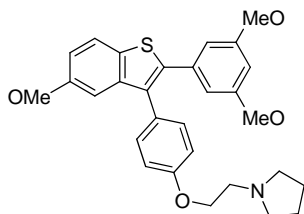

The product was obtained as a pale yellow oil (73% yield):  $^1\text{H}$  NMR (400 MHz,  $\text{CDCl}_3$ )  $\delta$  1.81-1.87 (m, 4H), 2.67-2.72 (m, 4H), 2.97 (t,  $J = 5.9$  Hz, 2H), 3.62 (s, 6H), 3.78 (s, 3H), 4.17 (t,  $J = 5.9$  Hz, 2H), 6.34 (t,  $J = 2.3$  Hz, 1H), 6.47 (d,  $J = 2.3$  Hz, 2H), 6.96 (d,  $J = 8.7$  Hz, 2H), 6.98-7.04 (m, 2H), 7.26 (d,  $J = 8.7$  Hz, 2H), 7.71 (d,  $J = 8.7$  Hz, 1H);  $^{13}\text{C}$  NMR (100 MHz,  $\text{CDCl}_3$ )  $\delta$  23.7 ( $\times 2$ ), 54.9 ( $\times 2$ ), 55.2, 55.4 ( $\times 2$ ), 55.8, 67.2, 100.5, 105.9, 107.7 ( $\times 2$ ), 114.9, 115.1 ( $\times 2$ ), 123.0, 128.3, 131.2, 131.6 ( $\times 2$ ), 133.2, 136.4, 140.5, 142.3, 157.9, 158.4, 160.6 ( $\times 2$ ).

### Compound 6{32}

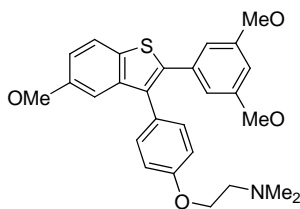

The product was obtained as a pale yellow oil (73% yield):  $^1\text{H}$  NMR (400 MHz,  $\text{CDCl}_3$ )  $\delta$  2.38 (s, 6H), 2.78 (t,  $J = 5.6$  Hz, 2H), 3.62 (s, 6H), 3.78 (s, 3H), 4.11 (t,  $J = 5.6$  Hz, 2H), 6.34 (t,  $J = 2.2$  Hz, 1H), 6.47 (d,  $J = 2.2$  Hz, 2H), 6.96 (d,  $J = 8.6$  Hz, 2H), 6.96-7.04 (m, 2H), 7.26 (d,  $J = 8.6$  Hz, 2H), 7.71 (d,  $J = 8.5$  Hz, 1H);  $^{13}\text{C}$  NMR (100 MHz,  $\text{CDCl}_3$ )  $\delta$  46.1 ( $\times 2$ ), 55.4 ( $\times 2$ ), 55.8, 58.5, 66.3, 100.5, 105.9, 107.7 ( $\times 2$ ), 114.8, 115.1 ( $\times 2$ ), 122.9, 128.3, 131.2, 131.6 ( $\times 2$ ), 133.2, 136.4, 140.5, 142.3, 157.9, 158.4, 160.6 ( $\times 2$ ).

### Compound 6{33}<sup>5</sup>



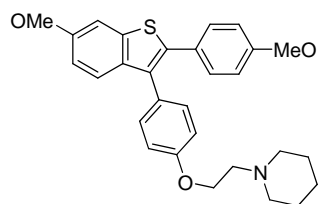

The product was obtained as a pale yellow oil (83% yield):  $^1\text{H}$  NMR (400 MHz,  $\text{CDCl}_3$ )  $\delta$  1.40-1.50 (m, 2H), 1.58-1.66 (m, 4H), 2.52-2.57 (m, 4H), 2.81 (t,  $J = 6.0$  Hz, 2H), 3.79 (s, 3H), 3.89 (s, 3H), 4.15 (t,  $J = 6.0$  Hz, 2H), 6.78 (d,  $J = 8.9$  Hz, 2H), 6.90-6.97 (m, 1H), 6.92 (d,  $J = 8.9$  Hz, 2H), 7.22 (d,  $J = 8.8$  Hz, 4H), 7.32 (d,  $J = 2.3$  Hz, 1H), 7.44 (d,  $J = 8.9$  Hz, 1H);  $^{13}\text{C}$  NMR (100 MHz,  $\text{CDCl}_3$ )  $\delta$  24.4, 26.1 ( $\times 2$ ), 55.3 ( $\times 2$ ), 55.4, 55.9, 58.2, 66.1, 104.8, 114.0 ( $\times 2$ ), 114.3, 114.9 ( $\times 2$ ), 124.0, 127.2, 128.2, 130.7 ( $\times 2$ ), 131.6 ( $\times 2$ ), 131.7, 135.5, 136.4, 139.9, 157.5, 158.2, 159.0; HRMS calcd for  $\text{C}_{29}\text{H}_{31}\text{NO}_3\text{S}$  [ $\text{M}+\text{H}^+$ ], 473.2025, found 474.2105.

### Compound 6{34}

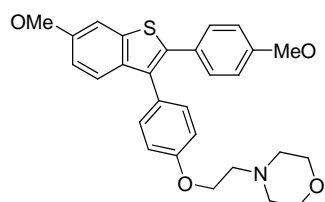

The product was obtained as a pale yellow oil (78% yield):  $^1\text{H}$  NMR (400 MHz,  $\text{CDCl}_3$ )  $\delta$  2.58-2.64 (m, 4H), 2.84 (t,  $J = 5.7$  Hz, 2H), 3.76 (t,  $J = 4.6$  Hz, 4H), 3.78 (s, 3H), 3.88 (s, 3H), 4.15 (t,  $J = 5.7$  Hz, 2H), 6.78 (d,  $J = 8.8$  Hz, 2H), 6.91-6.96 (m, 1H), 6.93 (d,  $J = 8.6$  Hz, 2H), 7.22 (d,  $J = 8.8$  Hz, 2H), 7.23 (d,  $J = 8.6$  Hz, 2H), 7.32 (d,  $J = 2.2$  Hz, 1H), 7.44 (d,  $J = 8.8$  Hz, 1H);  $^{13}\text{C}$  NMR (100 MHz,  $\text{CDCl}_3$ )  $\delta$  54.3 ( $\times 2$ ), 55.4, 55.9, 57.9, 66.0, 67.1 ( $\times 2$ ), 104.9, 114.0 ( $\times 2$ ), 114.4, 115.0 ( $\times 2$ ), 124.0, 127.2, 128.5, 130.7 ( $\times 2$ ), 131.6 ( $\times 2$ ), 131.7, 135.5, 136.5, 140.0, 157.6, 158.1, 159.1.

### Compound 6{35}

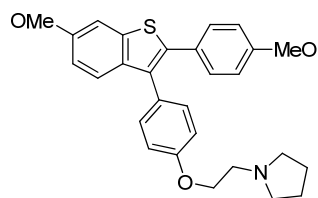

The product was obtained as a pale yellow oil (75% yield):  $^1\text{H}$  NMR (400 MHz,  $\text{CDCl}_3$ )  $\delta$  1.81-1.85 (m, 4H), 2.63-2.70 (m, 4H), 2.94 (t,  $J = 6.0$  Hz, 2H), 3.77 (s, 3H), 3.87 (s, 3H), 4.15 (t,  $J = 6.0$  Hz, 2H), 6.77 (d,  $J = 8.8$  Hz, 2H), 6.90-6.96 (m, 1H), 6.94 (d,  $J = 8.6$  Hz, 2H), 7.21 (d,  $J = 8.8$  Hz, 2H), 7.22 (d,  $J = 8.6$  Hz, 2H), 7.31 (d,  $J = 2.2$  Hz, 1H), 7.44 (d,  $J = 8.8$  Hz, 1H);  $^{13}\text{C}$  NMR (100 MHz,  $\text{CDCl}_3$ )

$\delta$  23.8 ( $\times 2$ ), 54.9 ( $\times 2$ ), 55.3, 55.4, 55.9, 67.2, 104.9, 114.0 ( $\times 2$ ), 114.3, 115.0 ( $\times 2$ ), 124.0, 127.2, 128.3, 130.7 ( $\times 2$ ), 131.6 ( $\times 2$ ), 131.8, 135.5, 136.5, 140.0, 157.6, 158.3, 159.1.

### Compound 6{36}

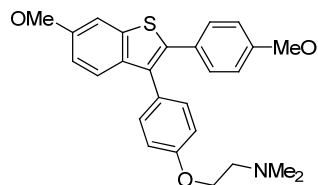

The product was obtained as a pale yellow oil (76% yield):  $^1\text{H}$  NMR (400 MHz,  $\text{CDCl}_3$ )  $\delta$  2.37 (s, 6H), 2.77 (t,  $J = 5.7$  Hz, 2H), 3.78 (s, 3H), 3.88 (s, 3H), 4.10 (t,  $J = 5.7$  Hz, 2H), 6.77 (d,  $J = 8.6$  Hz, 2H), 6.91-6.96 (m, 1H), 6.93 (d,  $J = 8.6$  Hz, 2H), 7.22 (d,  $J = 8.6$  Hz, 2H), 7.23 (d,  $J = 8.6$  Hz, 2H), 7.32 (d,  $J = 2.3$  Hz, 1H), 7.44 (d,  $J = 8.8$  Hz, 1H);  $^{13}\text{C}$  NMR (100 MHz,  $\text{CDCl}_3$ )  $\delta$  46.1 ( $\times 2$ ), 55.4, 55.9, 58.5, 66.2, 104.9, 114.0 ( $\times 2$ ), 114.3, 114.9 ( $\times 2$ ), 124.0, 127.2, 128.3, 130.7 ( $\times 2$ ), 131.6 ( $\times 2$ ), 131.7, 135.5, 136.5, 140.0, 157.6, 158.2, 159.1.

### Compound 6{37}

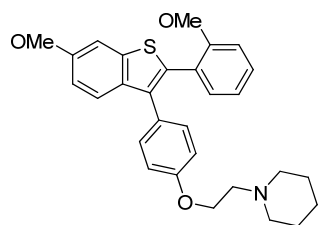

The product was obtained as a pale yellow oil (78% yield):  $^1\text{H}$  NMR (400 MHz,  $\text{CDCl}_3$ )  $\delta$  1.40-1.50 (m, 2H), 1.56-1.65 (m, 4H), 2.50-2.56 (m, 4H), 2.78 (t,  $J = 6.0$  Hz, 2H), 3.58 (s, 3H), 3.90 (s, 3H), 4.10 (t,  $J = 6.0$  Hz, 2H), 6.82-6.88 (m, 2H), 6.87 (d,  $J = 8.9$  Hz, 2H), 6.92-6.97 (m, 1H), 7.18 (d,  $J = 8.9$  Hz, 2H), 7.18-7.27 (m, 2H), 7.32-7.34 (m, 1H), 7.58 (d,  $J = 8.9$  Hz, 1H);  $^{13}\text{C}$  NMR (100 MHz,  $\text{CDCl}_3$ )  $\delta$  24.4, 26.1 ( $\times 2$ ), 55.2 ( $\times 2$ ), 55.5, 55.9, 58.2, 66.1, 104.8, 111.5, 114.2, 114.5 ( $\times 2$ ), 120.6, 123.7, 124.1, 128.7, 129.5, 131.0 ( $\times 2$ ), 132.7, 132.9, 134.3, 134.3, 141.3, 157.3, 157.5, 158.0; HRMS calcd for  $\text{C}_{29}\text{H}_{31}\text{NO}_3\text{S}$  [ $\text{M}^+$ ], 473.2025, found 473.2019.

### Compound 6{38}

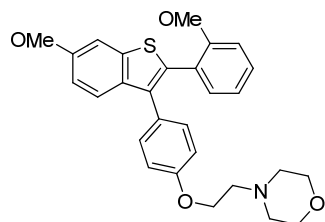

The product was obtained as a pale yellow oil (77% yield):  $^1\text{H}$  NMR (400 MHz,  $\text{CDCl}_3$ )  $\delta$  2.56-2.63 (m, 4H), 2.81 (t,  $J = 5.6$  Hz, 2H), 3.58 (s, 3H), 3.74 (t,  $J = 4.5$  Hz, 4H), 3.88 (s, 3H), 4.10 (t,  $J = 5.6$  Hz, 2H), 6.82-6.88 (m, 2H), 6.87 (d,  $J = 8.6$  Hz, 2H), 6.96 (dd,  $J = 2.3, 8.9$  Hz, 1H), 7.19 (d,  $J = 8.6$  Hz, 2H), 7.21-7.27 (m, 2H), 7.33 (d,  $J = 2.1$  Hz, 1H), 7.58 (d,  $J = 8.9$  Hz, 1H);  $^{13}\text{C}$  NMR (100 MHz,  $\text{CDCl}_3$ )  $\delta$  54.3 ( $\times 2$ ), 55.5, 55.9, 57.9, 65.9, 67.1 ( $\times 2$ ), 104.8, 111.4, 114.2, 114.5 ( $\times 2$ ), 120.6, 123.6, 124.0, 128.7, 129.5, 131.0 ( $\times 2$ ), 132.7, 132.9, 134.20, 134.22, 141.2, 157.2, 157.5, 158.0.

### Compound 6{39}

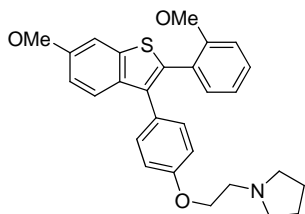

The product was obtained as a pale yellow oil (81% yield):  $^1\text{H}$  NMR (400 MHz,  $\text{CDCl}_3$ )  $\delta$  1.79-1.83 (m, 4H), 2.60-2.66 (m, 4H), 2.90 (t,  $J = 6.0$  Hz, 2H), 3.58 (s, 3H), 3.89 (s, 3H), 4.10 (t,  $J = 6.0$  Hz, 2H), 6.82-6.88 (m, 2H), 6.87 (d,  $J = 8.9$  Hz, 2H), 6.96 (dd,  $J = 2.3, 8.9$  Hz, 1H), 7.19 (d,  $J = 8.9$  Hz, 2H), 7.18-7.27 (m, 2H), 7.34 (d,  $J = 2.3$  Hz, 1H), 7.58 (d,  $J = 8.9$  Hz, 1H);  $^{13}\text{C}$  NMR (100 MHz,  $\text{CDCl}_3$ )  $\delta$  23.7 ( $\times 2$ ), 55.0 ( $\times 2$ ), 55.4, 55.5, 55.9, 67.2, 104.7, 111.4, 114.2, 114.5 ( $\times 2$ ), 120.6, 123.6, 124.1, 128.8, 129.5, 130.9 ( $\times 2$ ), 132.6, 132.9, 134.2, 134.3, 141.2, 157.2, 157.5, 158.0.

### Compound 6{40}

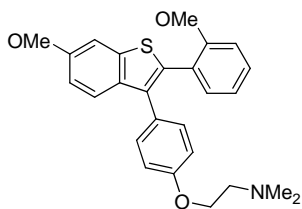

The product was obtained as a pale yellow oil (82% yield):  $^1\text{H}$  NMR (400 MHz,  $\text{CDCl}_3$ )  $\delta$  2.36 (s, 6H), 2.75 (t,  $J = 5.6$  Hz, 2H), 3.57 (s, 3H), 3.89 (s, 3H), 4.07 (t,  $J = 5.6$  Hz, 2H), 6.82-6.88 (m, 2H), 6.86 (d,  $J = 8.9$  Hz, 2H), 6.96 (dd,  $J = 2.3, 8.9$  Hz, 1H), 7.19 (d,  $J = 8.9$  Hz, 2H), 7.17-7.27 (m, 2H), 7.32-7.35 (m, 1H), 7.57 (d,  $J = 8.9$  Hz, 1H);  $^{13}\text{C}$  NMR (100 MHz,  $\text{CDCl}_3$ )  $\delta$  46.1 ( $\times 2$ ), 55.5, 55.9, 58.5, 66.1, 104.8, 111.5, 114.2, 114.5 ( $\times 2$ ), 120.6, 123.7, 124.1, 128.9, 129.5, 131.0 ( $\times 2$ ), 132.7, 132.9, 134.25, 134.30, 141.3, 157.3, 157.6, 157.9.

### Compound 6{41}<sup>5</sup>

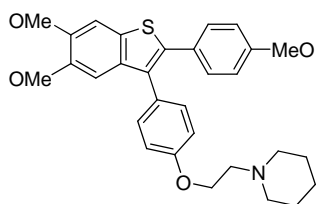

The product was obtained as a pale yellow oil (76% yield):  $^1\text{H}$  NMR (400 MHz,  $\text{CDCl}_3$ )  $\delta$  1.41-1.50 (m, 2H), 1.59-1.66 (m, 4H), 2.55-2.60 (m, 4H), 2.84 (t,  $J = 6.0$  Hz, 2H), 3.78 (s, 3H), 3.83 (s, 3H), 3.97 (s, 3H), 4.16 (t,  $J = 6.0$  Hz, 2H), 6.77 (d,  $J = 8.8$  Hz, 2H), 6.94 (d,  $J = 8.8$  Hz, 2H), 6.98 (s, 1H), 7.20 (d,  $J = 8.8$  Hz, 2H), 7.23 (d,  $J = 8.8$  Hz, 2H), 7.29 (s, 1H);  $^{13}\text{C}$  NMR (100 MHz,  $\text{CDCl}_3$ )  $\delta$  23.7, 26.2 ( $\times 2$ ), 55.0, 55.41, 55.43 ( $\times 2$ ), 56.3, 56.4, 67.3, 104.0, 104.8, 114.0 ( $\times 2$ ), 115.1 ( $\times 2$ ), 127.3, 128.4, 130.7 ( $\times 2$ ), 131.2, 131.5 ( $\times 2$ ), 131.9, 134.9, 137.3, 148.40, 148.43, 158.3, 159.0; HRMS calcd for  $\text{C}_{30}\text{H}_{34}\text{NO}_4\text{S}$  [ $\text{M}+\text{H}^+$ ], 504.2209, found 504.2146.

### Compound 6{43}

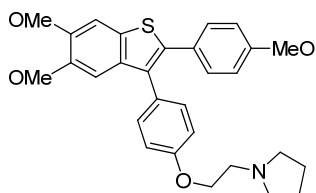

The product was obtained as a pale yellow oil (79% yield):  $^1\text{H}$  NMR (400 MHz,  $\text{CDCl}_3$ )  $\delta$  1.76-1.86 (m, 4H), 2.65-2.71 (m, 4H), 2.96 (t,  $J = 6.0$  Hz, 2H), 3.78 (s, 3H), 3.83 (s, 3H), 3.97 (s, 3H), 4.16 (t,  $J = 6.0$  Hz, 2H), 6.77 (d,  $J = 8.7$  Hz, 2H), 6.96 (d,  $J = 8.7$  Hz, 2H), 6.98 (s, 1H), 7.20 (d,  $J = 8.8$  Hz, 2H), 7.24 (d,  $J = 8.8$  Hz, 2H), 7.29 (s, 1H);  $^{13}\text{C}$  NMR (100 MHz,  $\text{CDCl}_3$ )  $\delta$  23.7 ( $\times 2$ ), 55.0 ( $\times 2$ ), 55.3, 55.4, 56.3, 56.4, 67.3, 104.0, 104.8, 114.0 ( $\times 2$ ), 115.1 ( $\times 2$ ), 127.3, 128.4, 130.7 ( $\times 2$ ), 131.2, 131.5 ( $\times 2$ ), 131.9, 134.9, 137.3, 148.40, 148.43, 158.3, 159.0; HRMS calcd for  $\text{C}_{29}\text{H}_{31}\text{NO}_4\text{S}$  [ $\text{M}^+$ ], 489.1974, found 489.1981.

### Compound 6{44}

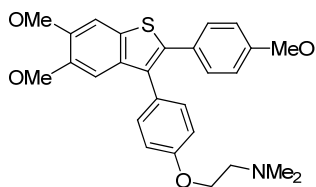

The product was obtained as a pale yellow oil (69% yield):  $^1\text{H}$  NMR (400 MHz,  $\text{CDCl}_3$ )  $\delta$  2.38 (s, 6H), 2.79 (t,  $J = 5.7$  Hz, 2H), 3.78 (s, 3H), 3.83 (s, 3H), 3.97 (s, 3H), 4.12 (t,  $J = 5.7$  Hz, 2H), 6.77 (d,  $J = 8.6$  Hz, 2H), 6.96 (d,  $J = 8.6$  Hz, 2H), 6.98 (s, 1H), 7.20 (d,  $J = 8.6$  Hz, 2H), 7.24 (d,  $J = 8.6$  Hz, 2H),

7.29 (s, 1H);  $^{13}\text{C}$  NMR (100 MHz,  $\text{CDCl}_3$ )  $\delta$  46.1 ( $\times 2$ ), 55.4, 56.2, 56.4, 58.6, 66.1, 104.0, 104.8, 114.0 ( $\times 2$ ), 115.0 ( $\times 2$ ), 127.3, 128.5, 130.7 ( $\times 2$ ), 131.2, 131.5 ( $\times 2$ ), 131.9, 134.9, 137.4, 148.40, 148.43, 158.2, 159.0.

### Compound 6{45}

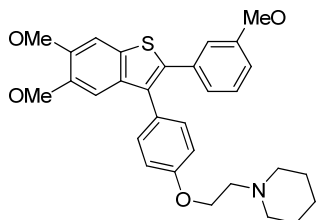

The product was obtained as a pale yellow oil (79% yield):  $^1\text{H}$  NMR (400 MHz,  $\text{CDCl}_3$ )  $\delta$  1.46 (br s, 2H), 1.59-1.66 (m, 4H), 2.52-2.58 (m, 4H), 2.82 (t,  $J = 5.9$  Hz, 2H), 3.62 (s, 3H), 3.84 (s, 3H), 3.97 (s, 3H), 4.16 (t,  $J = 5.9$  Hz, 2H), 6.73-6.83 (m, 2H), 6.89 (d,  $J = 7.6$  Hz, 1H), 6.96 (d,  $J = 8.6$  Hz, 2H), 6.98 (s, 1H), 7.15 (t,  $J = 8.0$  Hz, 1H), 7.24 (d,  $J = 8.6$  Hz, 2H), 7.30 (s, 1H);  $^{13}\text{C}$  NMR (100 MHz,  $\text{CDCl}_3$ )  $\delta$  24.3, 26.1 ( $\times 2$ ), 55.2, 55.3 ( $\times 2$ ), 56.3, 56.4, 58.2, 66.2, 103.9, 104.9, 113.6, 114.6, 115.1 ( $\times 2$ ), 122.0, 128.4, 129.5, 131.5 ( $\times 2$ ), 133.0, 134.8, 136.1, 137.2, 148.5, 148.7, 158.4, 159.5; HRMS calcd for  $\text{C}_{30}\text{H}_{33}\text{NO}_4\text{S}$  [ $\text{M}^+$ ], 503.2130, found 503.2134.

### Compound 6{47}

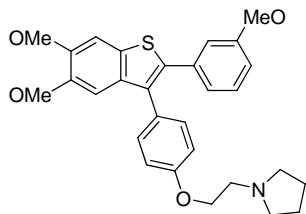

The product was obtained as a pale yellow oil (73% yield):  $^1\text{H}$  NMR (400 MHz,  $\text{CDCl}_3$ )  $\delta$  1.88-1.92 (m, 4H), 2.81-2.86 (m, 4H), 3.08 (t,  $J = 5.8$  Hz, 2H), 3.63 (s, 3H), 3.84 (s, 3H), 3.98 (s, 3H), 4.22 (t,  $J = 5.8$  Hz, 2H), 6.73-6.83 (m, 2H), 6.89 (d,  $J = 7.6$  Hz, 1H), 6.96 (d,  $J = 8.7$  Hz, 2H), 6.98 (s, 1H), 7.15 (t,  $J = 7.9$  Hz, 1H), 7.24 (d,  $J = 8.7$  Hz, 2H), 7.30 (s, 1H);  $^{13}\text{C}$  NMR (100 MHz,  $\text{CDCl}_3$ )  $\delta$  23.7 ( $\times 2$ ), 55.0 ( $\times 2$ ), 55.2, 55.3, 56.3, 56.5, 68.7, 104.0, 104.9, 113.6, 114.7, 115.1 ( $\times 2$ ), 122.0, 128.6, 129.5, 131.6 ( $\times 2$ ), 131.8, 132.9, 134.8, 136.1, 137.2, 148.6, 148.7, 158.2, 159.5; HRMS calcd for  $\text{C}_{29}\text{H}_{31}\text{NO}_4\text{S}$  [ $\text{M}^+$ ], 489.1974, found 489.1982.

### Compound 6{49}

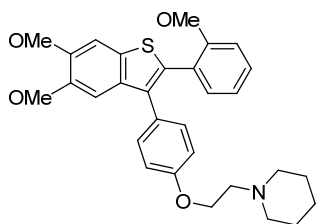

The product was obtained as a pale yellow oil (77% yield):  $^1\text{H}$  NMR (400 MHz,  $\text{CDCl}_3$ )  $\delta$  1.40-1.49 (m, 2H), 1.55-1.65 (m, 4H), 2.48-2.54 (m, 4H), 2.78 (t,  $J$  = 6.1 Hz, 2H), 3.57 (s, 3H), 3.86 (s, 3H), 3.97 (s, 3H), 4.10 (t,  $J$  = 6.1 Hz, 2H), 6.81-6.89 (m, 2H), 6.88 (d,  $J$  = 8.7 Hz, 2H), 7.12 (s, 1H), 7.21 (d,  $J$  = 8.7 Hz, 2H), 7.22-7.27 (m, 2H), 7.30 (s, 1H);  $^{13}\text{C}$  NMR (100 MHz,  $\text{CDCl}_3$ )  $\delta$  24.4, 26.1 ( $\times 2$ ), 55.3 ( $\times 2$ ), 55.5, 56.3, 56.4, 58.2, 66.1, 103.8, 104.7, 111.3, 114.6 ( $\times 2$ ), 120.5, 123.6, 128.9, 129.4, 130.8 ( $\times 2$ ), 132.4, 132.8, 133.4, 133.5, 134.4, 148.2, 148.3, 157.2, 157.9; HRMS calcd for  $\text{C}_{30}\text{H}_{34}\text{NO}_4\text{S}$  [ $\text{M}+\text{H}^+$ ], 504.2209, found 504.2209.

### Compound 6{50}

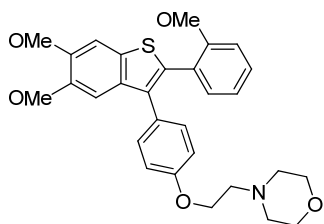

The product was obtained as a pale yellow oil (72% yield):  $^1\text{H}$  NMR (400 MHz,  $\text{CDCl}_3$ )  $\delta$  2.55-2.60 (m, 4H), 2.80 (t,  $J$  = 5.7 Hz, 2H), 3.56 (s, 3H), 3.73 (t,  $J$  = 4.5 Hz, 4H), 3.85 (s, 3H), 3.96 (s, 3H), 4.10 (t,  $J$  = 5.7 Hz, 2H), 6.81-6.89 (m, 2H), 6.87 (d,  $J$  = 8.8 Hz, 2H), 7.11 (s, 1H), 7.20 (d,  $J$  = 8.8 Hz, 2H), 7.23-7.27 (m, 2H), 7.30 (s, 1H);  $^{13}\text{C}$  NMR (100 MHz,  $\text{CDCl}_3$ )  $\delta$  54.3 ( $\times 2$ ), 55.5, 56.3, 56.4, 57.9, 66.0, 67.1 ( $\times 2$ ), 104.0, 104.8, 111.4, 114.6 ( $\times 2$ ), 120.5, 123.7, 129.1, 129.4, 130.8 ( $\times 2$ ), 132.5, 132.8, 133.52, 133.53, 134.3, 148.3, 148.4, 157.2, 157.8.

### Compound 6{51}

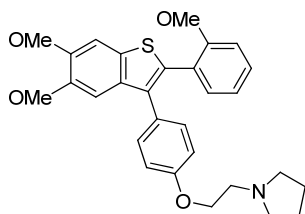

The product was obtained as a pale yellow oil (68% yield):  $^1\text{H}$  NMR (400 MHz,  $\text{CDCl}_3$ )  $\delta$  1.80-1.84 (m, 4H), 2.61-2.66 (m, 4H), 2.92 (t,  $J$  = 5.9 Hz, 2H), 3.57 (s, 3H), 3.86 (s, 3H), 3.97 (s, 3H), 4.11 (t,  $J$

= 5.9 Hz, 2H), 6.81-6.90 (m, 2H), 6.88 (d,  $J = 8.7$  Hz, 2H), 7.12 (s, 1H), 7.21 (d,  $J = 8.7$  Hz, 2H), 7.22-7.27 (m, 2H), 7.30 (s, 1H);  $^{13}\text{C}$  NMR (100 MHz,  $\text{CDCl}_3$ )  $\delta$  23.7 ( $\times 2$ ), 55.0 ( $\times 2$ ), 55.4, 55.5, 56.3, 56.5, 67.3, 104.0, 104.9, 111.4, 114.6 ( $\times 2$ ), 120.6, 123.7, 129.0, 129.5, 130.9 ( $\times 2$ ), 132.5, 132.9, 133.5, 133.7, 134.5, 148.3, 148.4, 157.3, 158.0.

#### Compound 6{52}

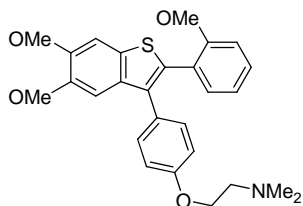

The product was obtained as a pale yellow oil (71% yield):  $^1\text{H}$  NMR (400 MHz,  $\text{CDCl}_3$ )  $\delta$  2.34 (s, 6H), 2.73 (t,  $J = 5.7$  Hz, 2H), 3.56 (s, 3H), 3.85 (s, 3H), 3.96 (s, 3H), 4.06 (t,  $J = 5.7$  Hz, 2H), 6.81-6.90 (m, 2H), 6.88 (d,  $J = 8.7$  Hz, 2H), 7.12 (s, 1H), 7.21 (d,  $J = 8.7$  Hz, 2H), 7.22-7.27 (m, 2H), 7.30 (s, 1H);  $^{13}\text{C}$  NMR (100 MHz,  $\text{CDCl}_3$ )  $\delta$  46.1 ( $\times 2$ ), 55.5, 56.3, 56.4, 58.6, 66.2, 104.0, 104.9, 111.4, 114.6 ( $\times 2$ ), 120.5, 123.7, 129.0, 129.4, 130.8 ( $\times 2$ ), 132.5, 132.8, 133.5, 133.6, 134.4, 148.3, 148.4, 157.2, 157.9.

#### Compound 6{53}

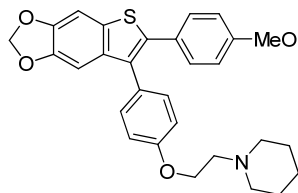

The product was obtained as a pale yellow oil (81% yield):  $^1\text{H}$  NMR (400 MHz,  $\text{CDCl}_3$ )  $\delta$  1.41-1.50 (m, 2H), 1.58-1.66 (m, 4H), 2.50-2.56 (m, 4H), 2.84 (t,  $J = 6.0$  Hz, 2H), 3.79 (s, 3H), 4.16 (t,  $J = 6.0$  Hz, 2H), 5.98 (s, 2H), 6.77 (d,  $J = 8.9$  Hz, 2H), 6.94 (d,  $J = 8.7$  Hz, 2H), 6.95 (s, 1H), 7.19 (d,  $J = 8.9$  Hz, 2H), 7.20 (d,  $J = 8.7$  Hz, 2H), 7.22 (s, 1H);  $^{13}\text{C}$  NMR (100 MHz,  $\text{CDCl}_3$ )  $\delta$  23.8, 26.2 ( $\times 2$ ), 55.3 ( $\times 2$ ), 55.4, 58.3, 67.2, 101.4, 101.5, 102.3, 114.0 ( $\times 2$ ), 114.9, 115.0 ( $\times 2$ ), 127.1, 128.2, 130.6 ( $\times 2$ ), 131.6 ( $\times 2$ ), 132.0, 136.0, 137.5, 146.6, 146.9, 158.3, 159.0; HRMS calcd for  $\text{C}_{29}\text{H}_{29}\text{NO}_4\text{S}$  [ $\text{M}^+$ ], 487.1817, found 487.1817.

#### Compound 6{55}

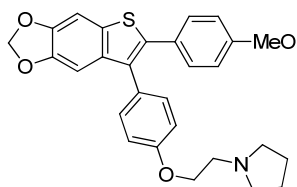

The product was obtained as a pale yellow oil (69% yield):  $^1\text{H}$  NMR (400 MHz,  $\text{CDCl}_3$ )  $\delta$  1.81-1.85 (m, 4H), 2.63-2.68 (m, 4H), 2.94 (t,  $J = 6.0$  Hz, 2H), 3.78 (s, 3H), 4.15 (t,  $J = 6.0$  Hz, 2H), 5.98 (s, 2H), 6.77 (d,  $J = 8.9$  Hz, 2H), 6.94 (d,  $J = 8.7$  Hz, 2H), 6.95 (s, 1H), 7.19 (d,  $J = 8.9$  Hz, 2H), 7.20 (d,  $J = 8.7$  Hz, 2H), 7.22 (s, 1H);  $^{13}\text{C}$  NMR (100 MHz,  $\text{CDCl}_3$ )  $\delta$  23.7 ( $\times 2$ ), 55.0 ( $\times 2$ ), 55.36, 55.42, 67.2, 101.4, 101.5, 102.3, 114.0 ( $\times 2$ ), 114.9, 115.0 ( $\times 2$ ), 127.1, 128.2, 130.6 ( $\times 2$ ), 131.6 ( $\times 2$ ), 132.0, 136.0, 137.5, 146.6, 146.9, 158.3, 159.0; HRMS calcd for  $\text{C}_{28}\text{H}_{28}\text{NO}_4\text{S}$  [ $\text{M}+\text{H}^+$ ], 474.1739, found 474.1754.

### Compound 6{56}

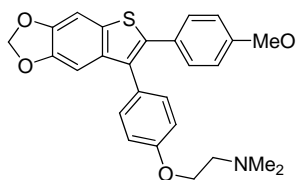

The product was obtained as a pale yellow oil (79% yield):  $^1\text{H}$  NMR (400 MHz,  $\text{CDCl}_3$ )  $\delta$  2.37 (s, 6H), 2.77 (t,  $J = 5.6$  Hz, 2H), 3.77 (s, 3H), 4.10 (t,  $J = 5.6$  Hz, 2H), 5.98 (s, 2H), 6.76 (d,  $J = 8.8$  Hz, 2H), 6.94 (d,  $J = 8.6$  Hz, 2H), 6.95 (s, 1H), 7.19 (d,  $J = 8.8$  Hz, 2H), 7.20 (d,  $J = 8.6$  Hz, 2H), 7.22 (s, 1H);  $^{13}\text{C}$  NMR (100 MHz,  $\text{CDCl}_3$ )  $\delta$  46.2 ( $\times 2$ ), 55.4, 58.6, 66.2, 101.4, 101.5, 102.4, 114.0 ( $\times 2$ ), 114.9, 115.0 ( $\times 2$ ), 127.2, 128.3, 130.6 ( $\times 2$ ), 131.6 ( $\times 2$ ), 132.1, 136.1, 137.6, 146.6, 146.9, 158.3, 159.1.

### ◆ General Procedure for Demethylation to Prepare Compounds 7

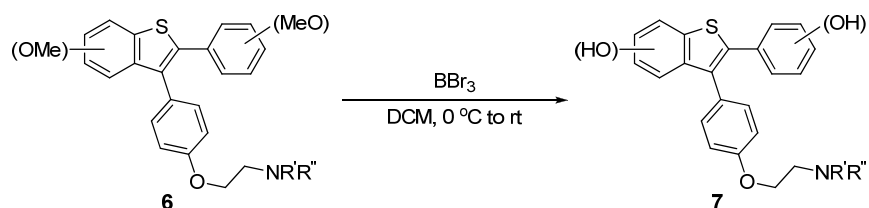

To a solution of **6** (0.10 mmol) in anhydrous  $\text{CH}_2\text{Cl}_2$  (2 mL) cooled in an ice water bath under  $\text{N}_2$  was added  $\text{BBr}_3$  (1.0 M sol'n in  $\text{CH}_2\text{Cl}_2$ ; 2.0 or 4.0 or 6.0 equiv) was added while stirring. The solution turned orange in color. This solution was stirred for 3 h after slowly warming to room



temperature. The reaction was quenched with satd aq NaHCO<sub>3</sub> (2 × 2 mL) and the product was extracted with 5% CH<sub>3</sub>OH/CHCl<sub>3</sub> (3 × 5 mL). The combined organic layers were dried over anhydrous MgSO<sub>4</sub> and concentrated under a vacuum to yield the crude product, which was purified by column chromatography using 5-10% CH<sub>3</sub>OH/CHCl<sub>3</sub> as the eluent to provide desketoraloxifene analogues **7**.

#### Compound **7{4}**

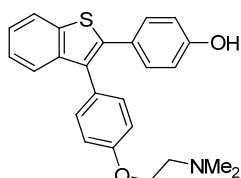

The product was obtained as a white solid (56% yield): <sup>1</sup>H NMR (400 MHz, DMSO-*d*<sub>6</sub>) δ 2.25 (s, 6H), 2.67 (t, *J* = 5.7 Hz, 2H), 4.09 (t, *J* = 5.8 Hz, 2H), 6.70 (d, *J* = 8.7 Hz, 2H), 7.01 (d, *J* = 8.7 Hz, 2H), 7.11 (d, *J* = 8.7 Hz, 2H), 7.20 (d, *J* = 8.7 Hz, 2H), 7.32-7.38 (m, 2H), 7.42-7.45 (m, 1H), 7.95-7.99 (m, 1H), 9.71 (s, 1H); <sup>13</sup>C NMR (100 MHz, DMSO-*d*<sub>6</sub>) δ 45.4 (×2), 57.6, 65.6, 114.7 (×2), 115.4 (×2), 122.2, 122.5, 124.2, 124.3, 124.6, 127.0, 130.3 (×2), 131.1, 131.2 (×2), 137.4, 138.8, 140.6, 157.3, 157.7; HRMS calcd for C<sub>24</sub>H<sub>24</sub>NO<sub>2</sub>S [M+H<sup>+</sup>], 390.1528, found 390.1528.

#### Compound **7{19}**<sup>5</sup>

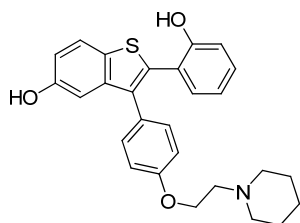

The product was obtained as a white solid (52% yield): <sup>1</sup>H NMR (400 MHz, DMSO-*d*<sub>6</sub>) δ 1.33-1.42 (m, 2H), 1.45-1.55 (m, 4H), 2.48-2.52 (m, 4H), 2.68-2.74 (m, 2H), 4.07 (t, *J* = 5.6 Hz, 2H), 6.68 (t, *J* = 7.6 Hz, 1H), 6.84 (d, *J* = 8.1 Hz, 1H), 6.88 (dd, *J* = 2.3, 8.6 Hz, 1H), 6.92 (d, *J* = 8.8 Hz, 2H), 6.95 (d, *J* = 2.1 Hz, 1H), 7.01 (dd, *J* = 1.5, 7.6 Hz, 1H), 7.07-7.14 (m, 1H), 7.17 (d, *J* = 8.8 Hz, 2H), 7.73 (d, *J* = 8.6 Hz, 1H), 9.36 (s, 1H), 9.61 (s, 1H); <sup>13</sup>C NMR (100 MHz, DMSO-*d*<sub>6</sub>) δ 23.6, 25.2 (×2), 54.2 (×2), 57.2, 65.1, 107.3, 114.3 (×2), 114.6, 115.7, 118.6, 120.7, 122.7, 127.6, 129.4, 129.5, 130.6 (×2), 132.0, 133.2, 136.5, 140.7, 154.9, 155.4, 157.3; HRMS calcd for C<sub>27</sub>H<sub>28</sub>NO<sub>3</sub>S [M+H<sup>+</sup>], 446.1790, found 446.1787.

#### Compound **7{24}**<sup>5</sup>

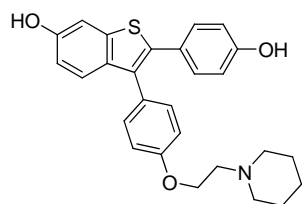

The product was obtained as a white solid (78% yield):  $^1\text{H}$  NMR (400 MHz,  $\text{DMSO-}d_6$ )  $\delta$  1.34-1.43 (m, 2H), 1.48-1.57 (m, 4H), 2.50-2.53 (m, 4H), 2.70-2.76 (m, 2H), 4.10 (t,  $J = 5.7$  Hz, 2H), 6.67 (d,  $J = 8.7$  Hz, 2H), 6.84 (dd,  $J = 2.2, 8.7$  Hz, 1H), 6.99 (d,  $J = 8.7$  Hz, 2H), 7.05 (d,  $J = 8.7$  Hz, 2H), 7.17 (d,  $J = 8.7$  Hz, 2H), 7.23 (d,  $J = 8.7$  Hz, 1H), 7.28 (d,  $J = 2.2$  Hz, 1H), 9.62 (s, 1H), 9.65 (s, 1H);  $^{13}\text{C}$  NMR (100 MHz,  $\text{DMSO-}d_6$ )  $\delta$  23.7, 25.3 ( $\times 2$ ), 54.3 ( $\times 2$ ), 57.2, 65.3, 107.0, 114.6, 114.7 ( $\times 2$ ), 115.3 ( $\times 2$ ), 123.2, 124.6, 127.4, 130.1 ( $\times 2$ ), 130.7, 131.0 ( $\times 2$ ), 133.5, 134.8, 138.8, 155.1, 156.9, 157.6; HRMS calcd for  $\text{C}_{27}\text{H}_{27}\text{NO}_3\text{S}$  [ $\text{M}+\text{H}^+$ ], 446.1790, found 446.1793.

### Compound 7{27}

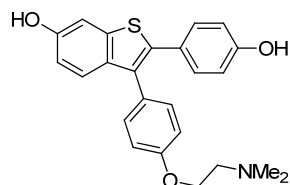

The product was obtained as a white solid (47% yield):  $^1\text{H}$  NMR (400 MHz,  $\text{DMSO-}d_6$ )  $\delta$  2.22 (s, 6H), 2.62 (t,  $J = 5.7$  Hz, 2H), 4.07 (t,  $J = 5.8$  Hz, 2H), 6.67 (d,  $J = 8.7$  Hz, 2H), 6.84 (dd,  $J = 2.2, 8.7$  Hz, 1H), 6.99 (d,  $J = 8.7$  Hz, 2H), 7.05 (d,  $J = 8.7$  Hz, 2H), 7.17 (d,  $J = 8.7$  Hz, 2H), 7.23 (d,  $J = 8.7$  Hz, 1H), 7.28 (d,  $J = 2.2$  Hz, 1H), 9.67 (br s, 2H);  $^{13}\text{C}$  NMR (100 MHz,  $\text{DMSO-}d_6$ )  $\delta$  45.7 ( $\times 2$ ), 57.3, 65.7, 107.0, 114.7 (1 peak overlap), 114.7 ( $\times 2$ ), 115.4 ( $\times 2$ ), 123.3, 124.6, 127.3, 130.1 ( $\times 2$ ), 130.8, 131.1 ( $\times 2$ ), 133.5, 134.8, 138.9, 155.1, 156.1, 157.6; HRMS calcd for  $\text{C}_{24}\text{H}_{23}\text{NO}_3\text{S}$  [ $\text{M}+\text{H}^+$ ], 406.1477, found 406.1471.

## ◆ References

1. Fürstner, A.; Kennedy, J. W. J. Total Syntheses of the Tylophora Alkaloids Cryptopleurine, (-)-Antofine, (-)-Tylophorine, and (-)-Ficuseptine C. *Chem. Eur. J.* **2006**, *12*, 7398-7410.
2. Muraki, T.; H. Togo, H.; Yokoyama, M. Reactivity and Synthetic Utility of 1-(Arenesulfonyloxy)benziodoxolones. *J. Org. Chem.* **1999**, *64*, 2883-2889.
3. Cho, C.-H.; Neuenswander, B.; Lushington, G. H.; Larock, R. C., Solution-Phase Parallel Synthesis of a Multi-substituted Benzo[*b*]thiophene Library. *J. Comb. Chem.* **2009**, *11*, 900-906.
4. Cho, C.-H.; Neuenswander, B.; Larock, R. C., Diverse Methyl Sulfone-Containing Benzo[*b*]thiophene Library via Iodocyclization and Palladium-Catalyzed Coupling. *J. Comb. Chem.* **2010**, *12*, 278-285.
5. Cho, C.-H.; Larock, R. C. A Convenient Synthetic Route to Furan Esters and Lactones by Palladium-Catalyzed Carboalkoxylation or Cyclocarbonylation of Hydroxyl-Substituted 3-Iodofurans. *Tetrahedron Lett.* **2010**, *51*, 3417-3421.
6. Yue, D.; Larock, R. C. Synthesis of 2,3-Disubstituted Benzo[*b*]thiophenes via Palladium-Catalyzed Coupling and Electrophilic Cyclization of Terminal Acetylenes. *J. Org. Chem.* **2002**, *67*, 1905-1909.

3-Iodobenzo[*b*]thiophene 4{2}

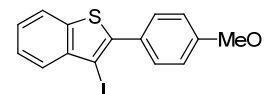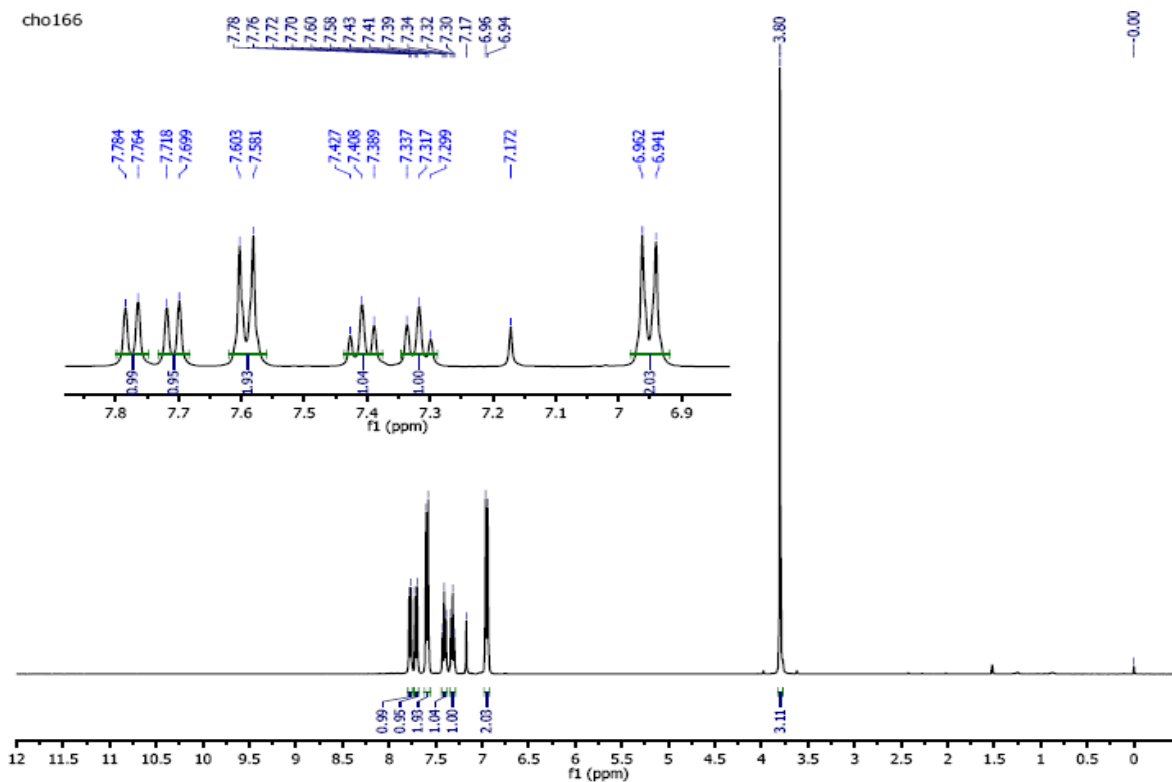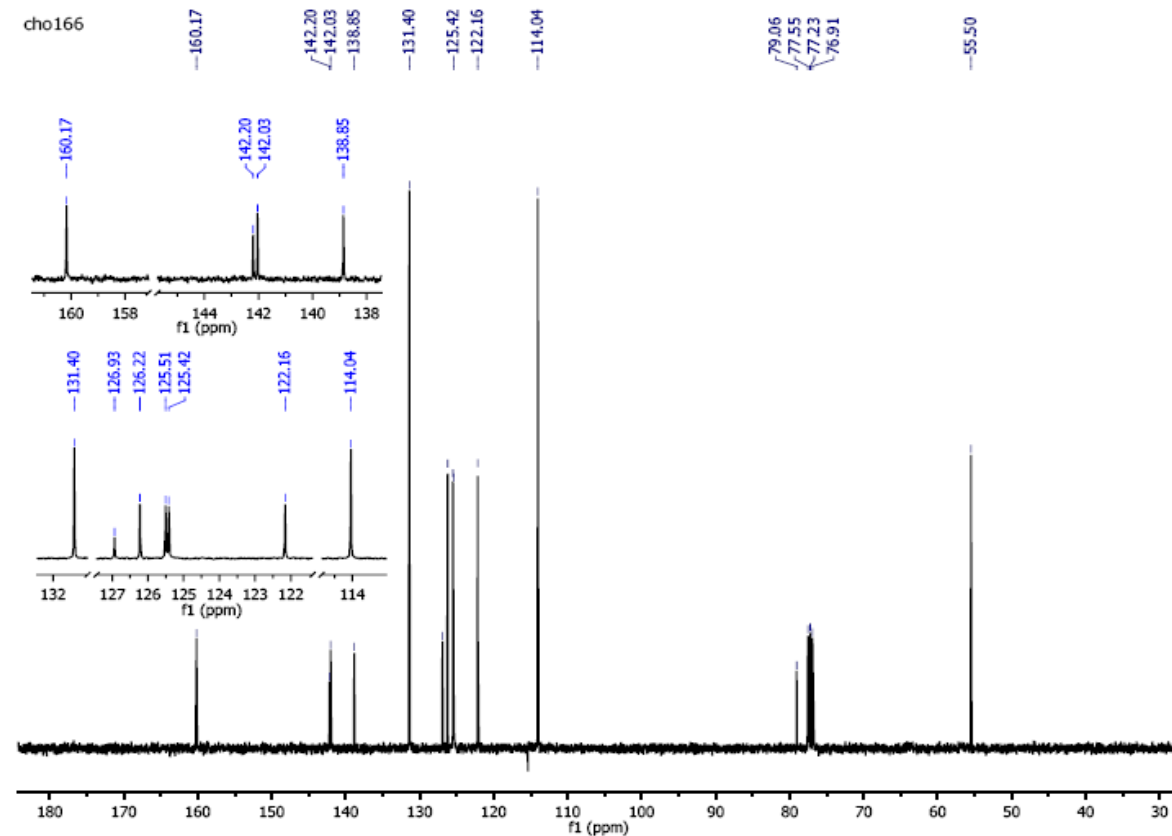

3-Iodobenzo[b]thiophene 4{3}

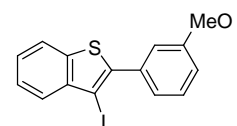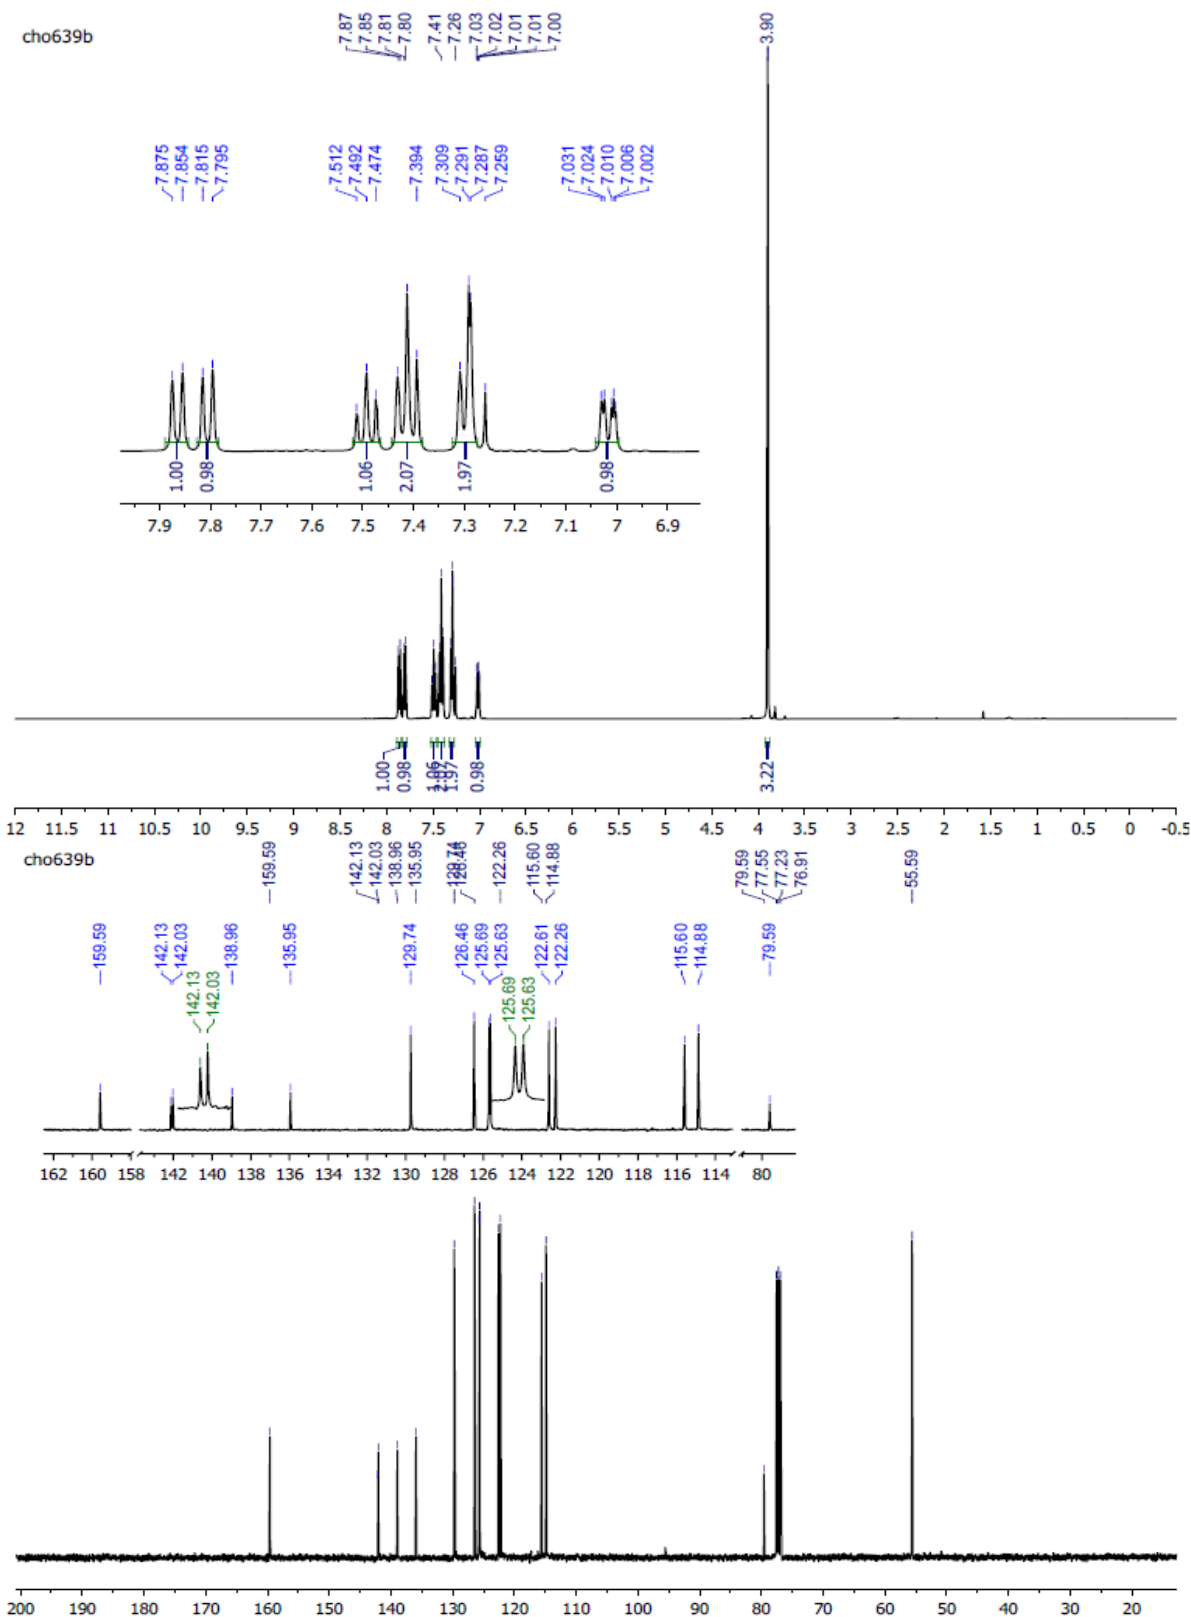

# 3-Iodobenzo[b]thiophene 4{4}

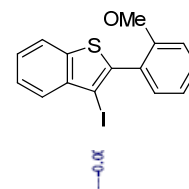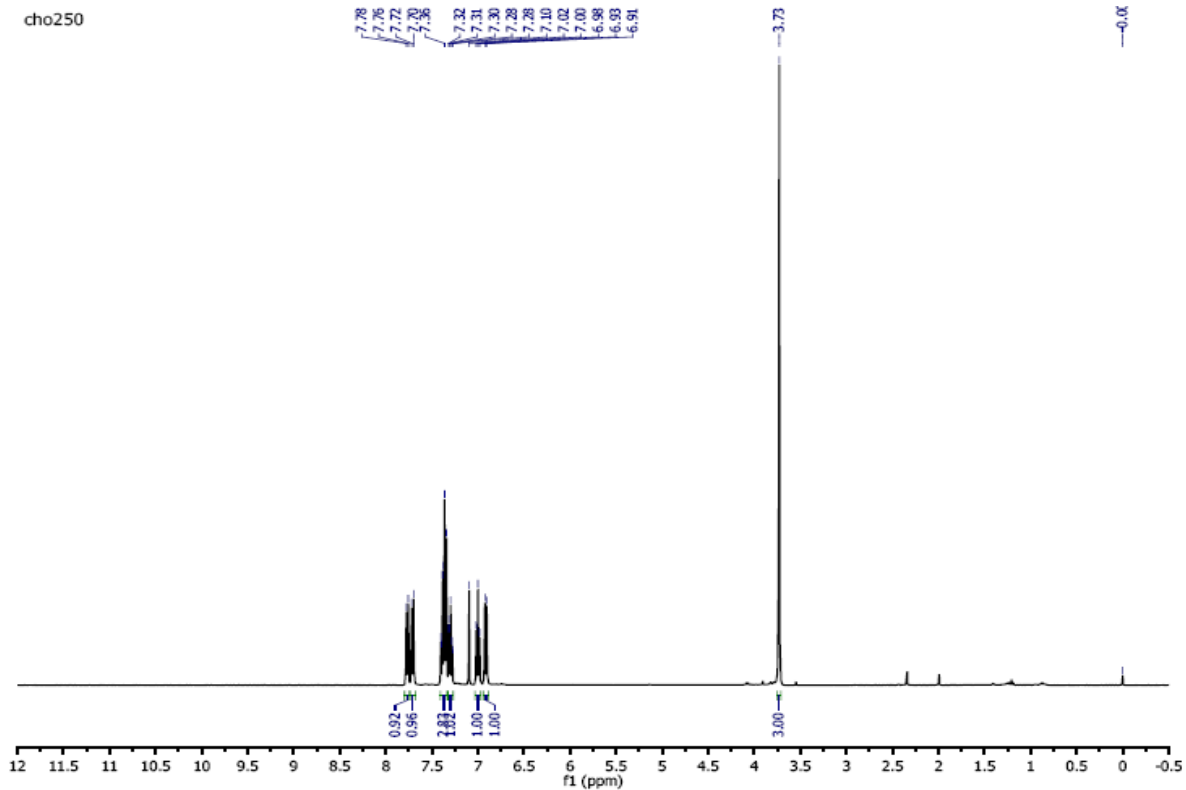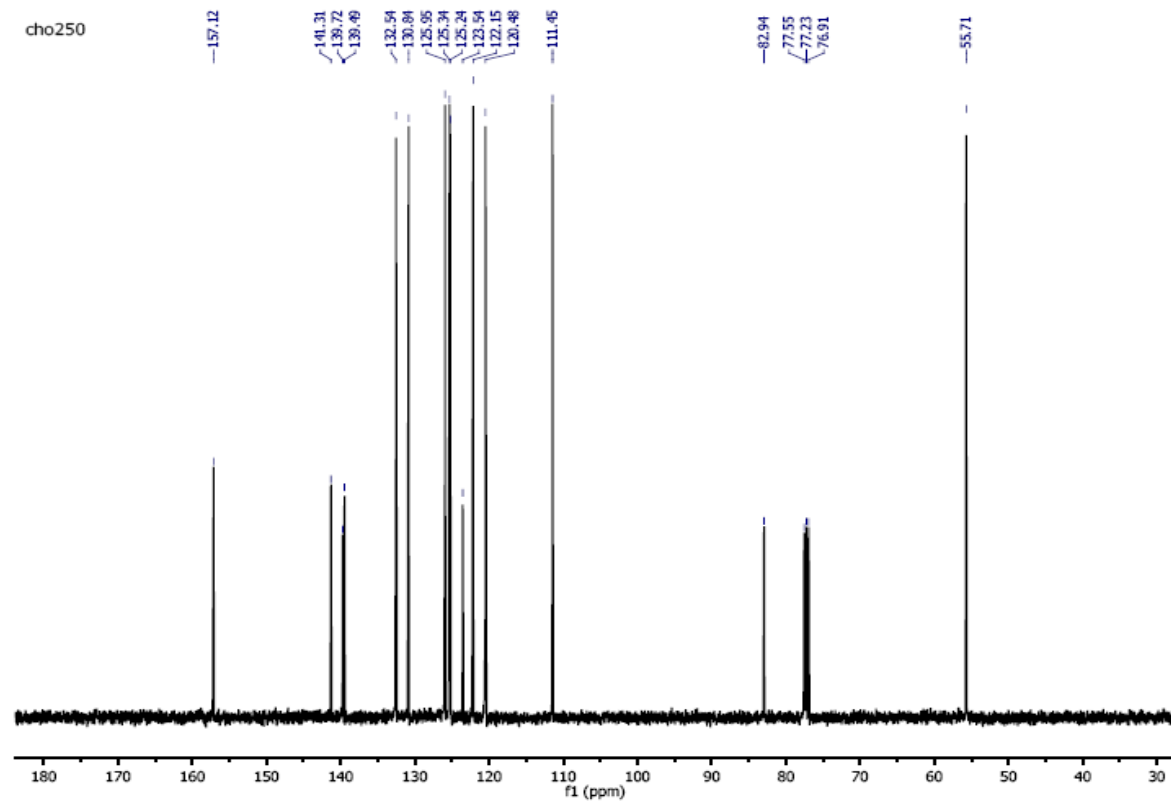

# 3-Iodobenzo[b]thiophene 4{5}

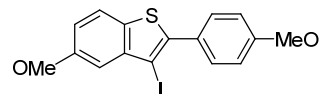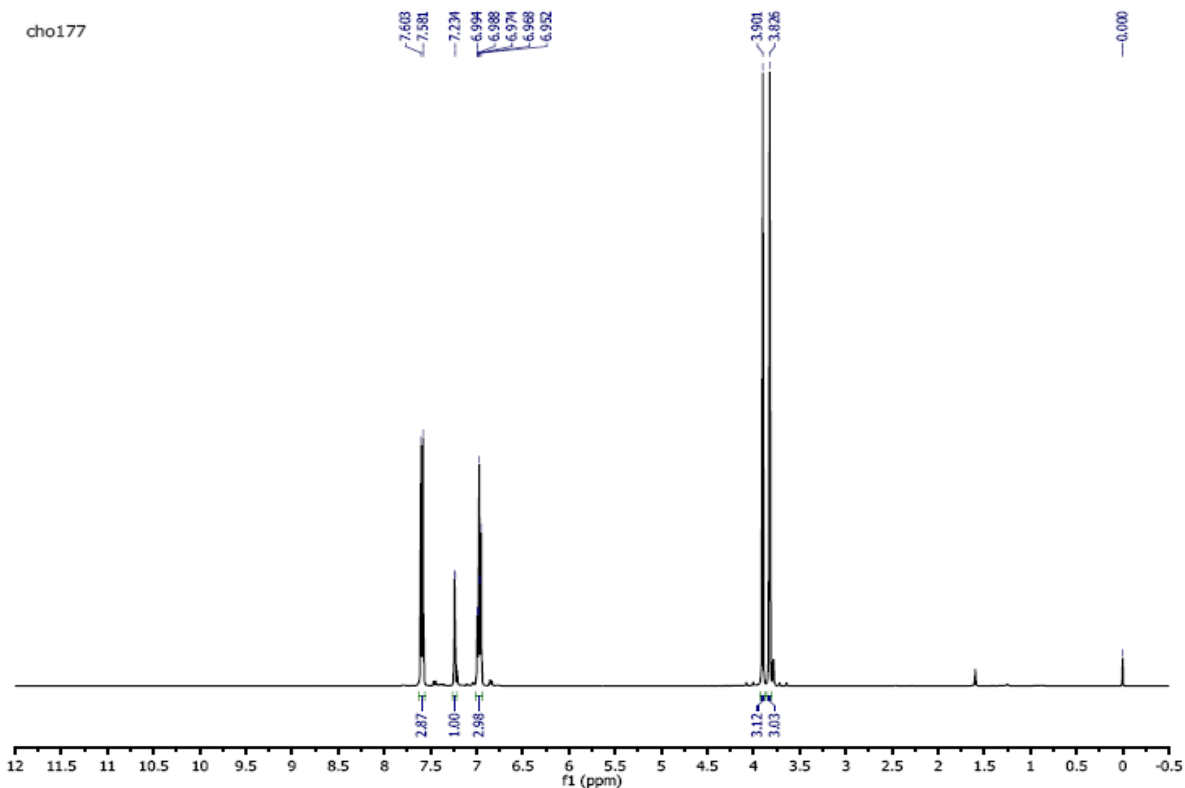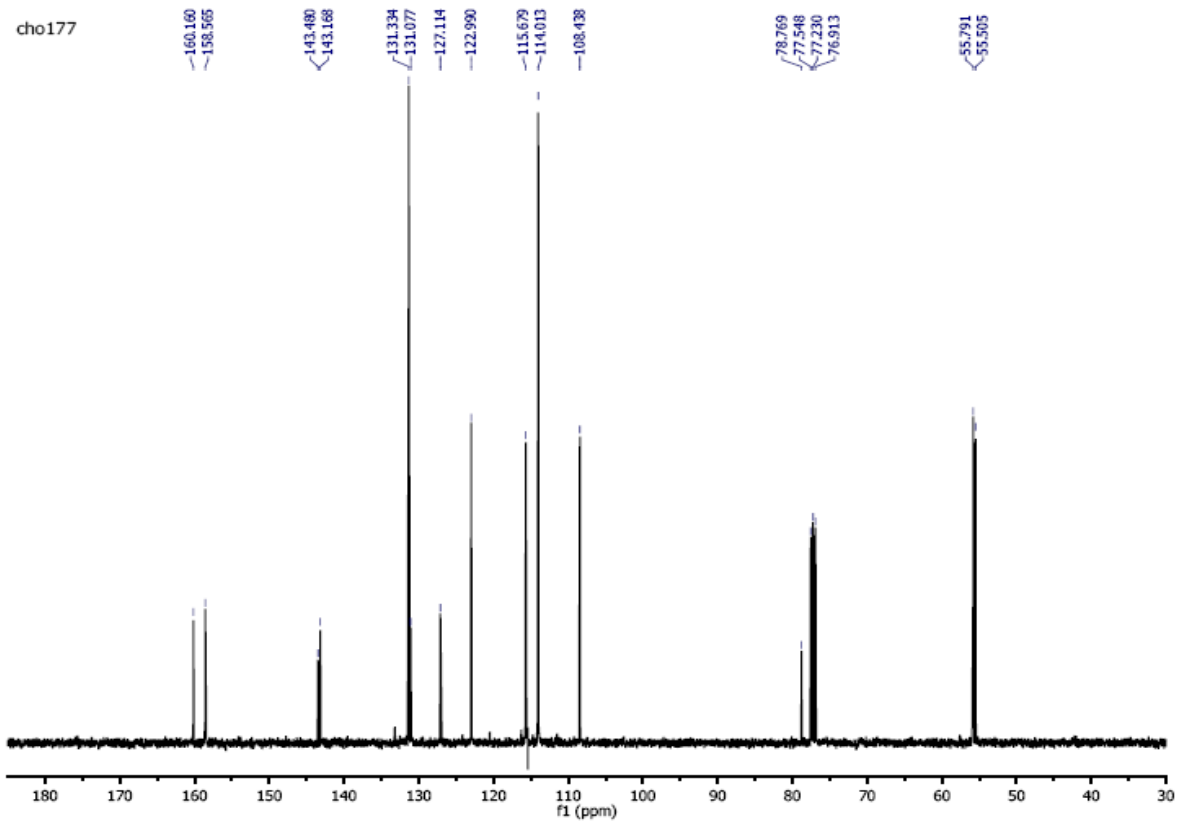

3-Iodobenzo[*b*]thiophene 4{6}

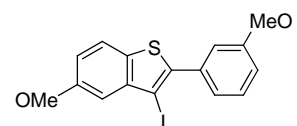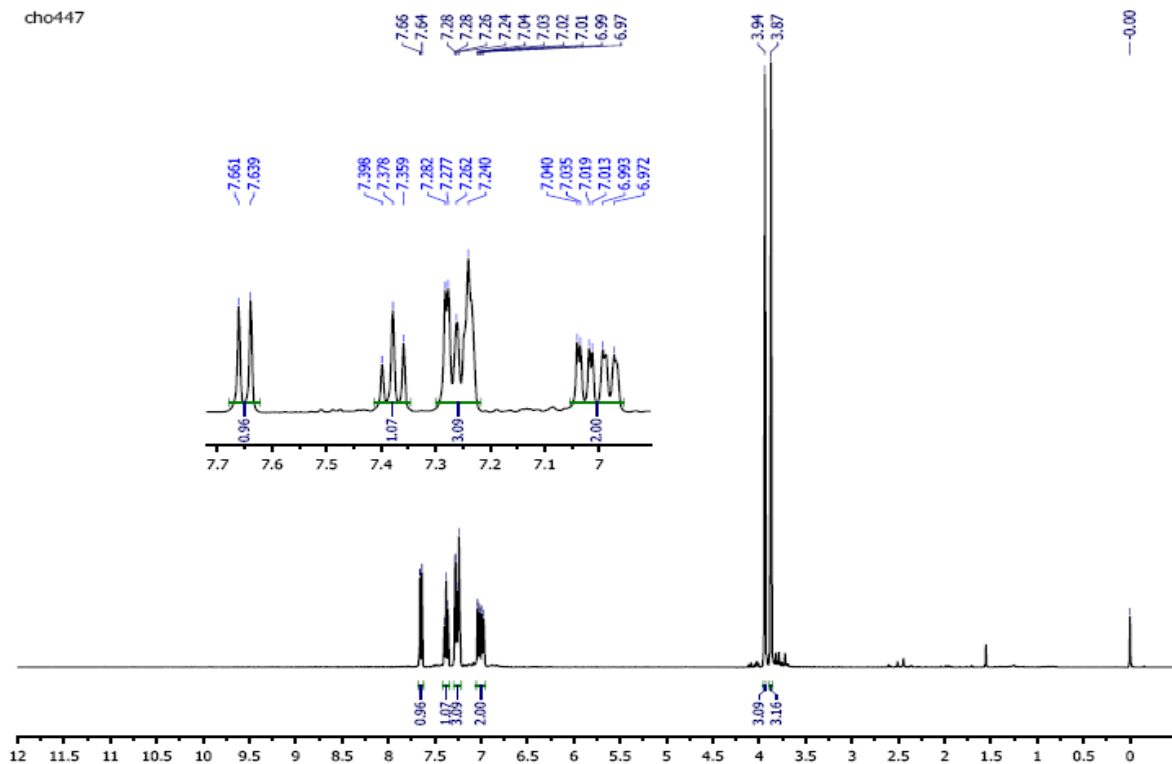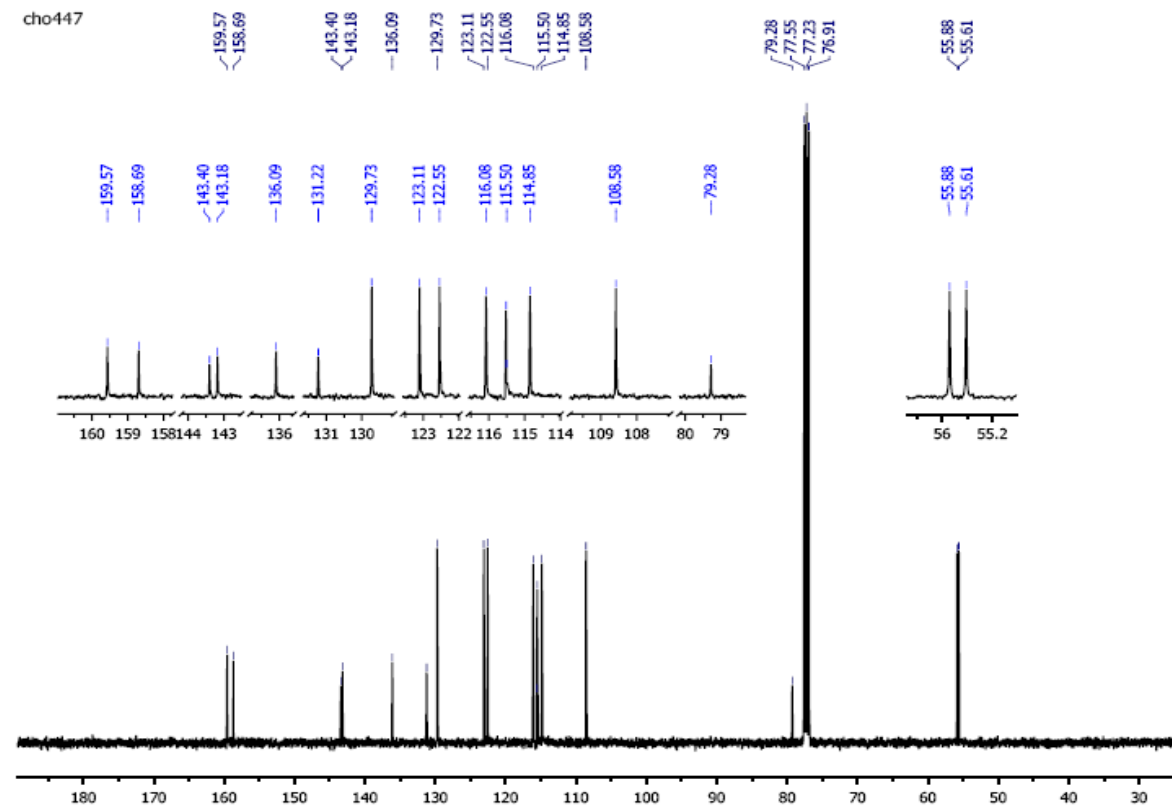



### 3-Iodobenzo[*b*]thiophene 4{7}

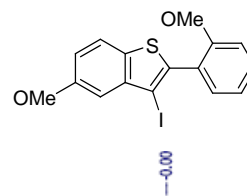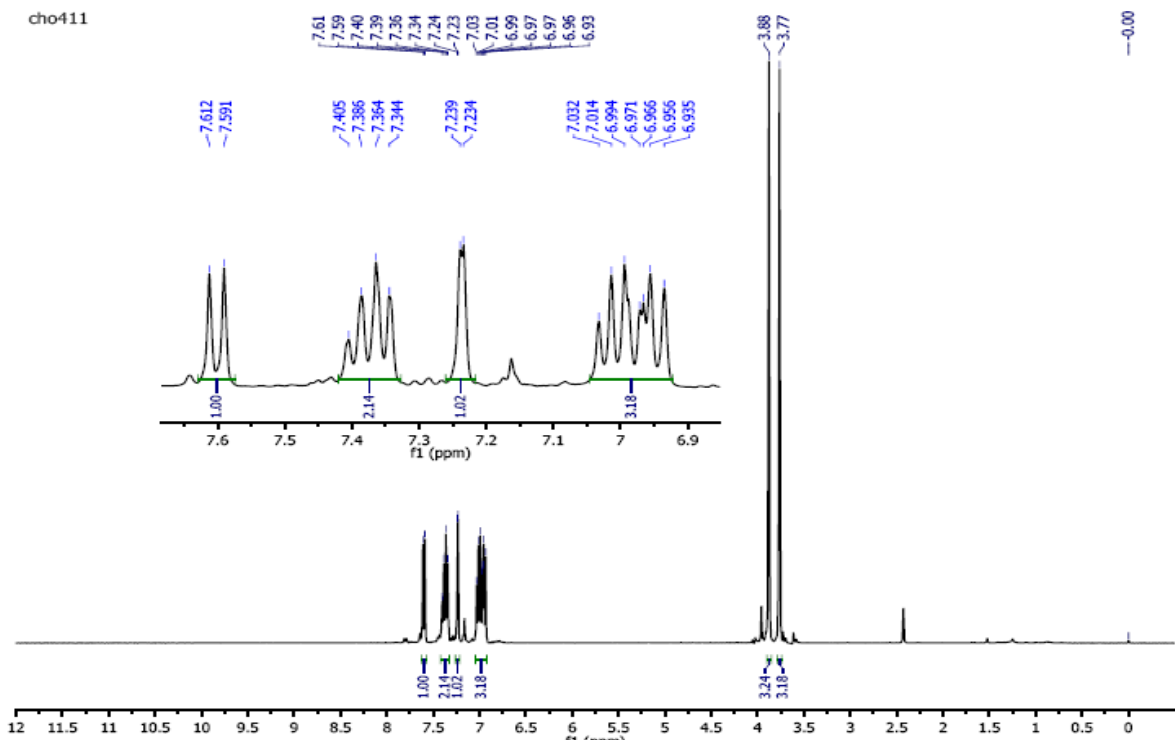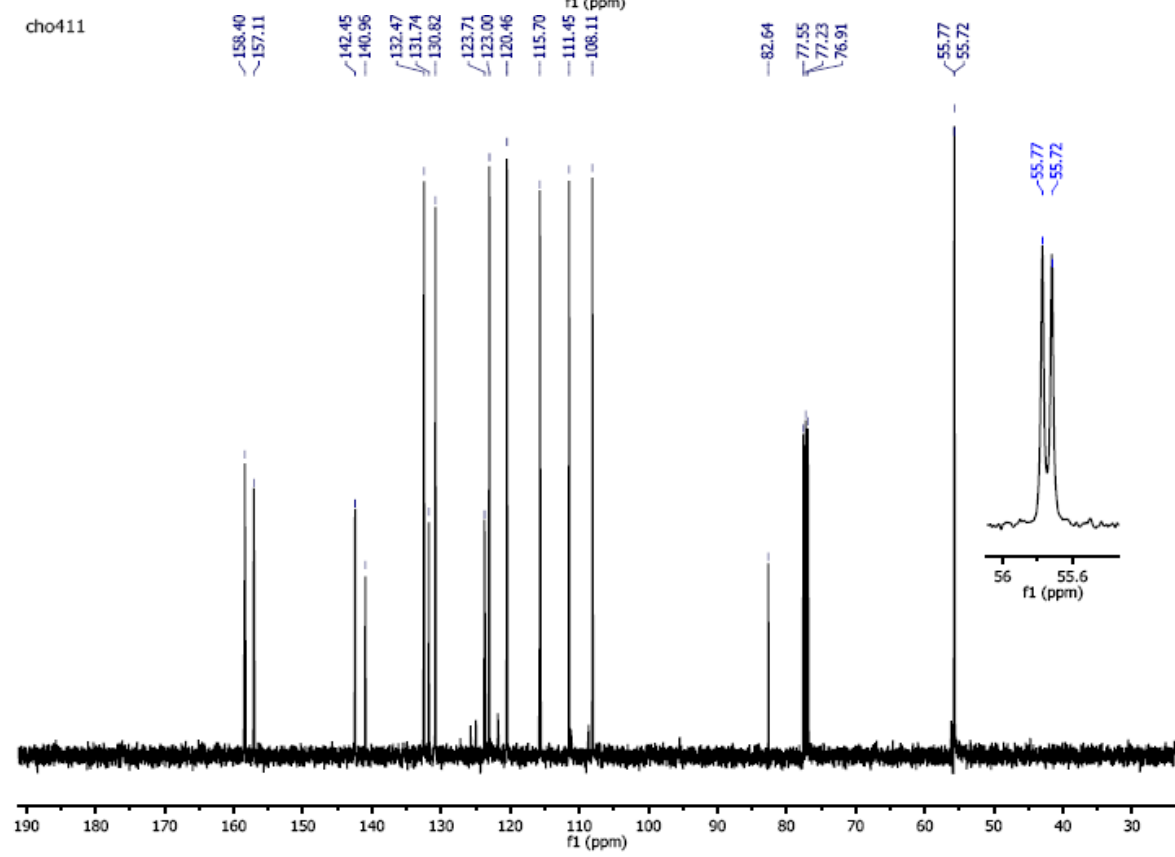

### 3-Iodobenzo[b]thiophene 4{8}

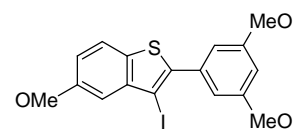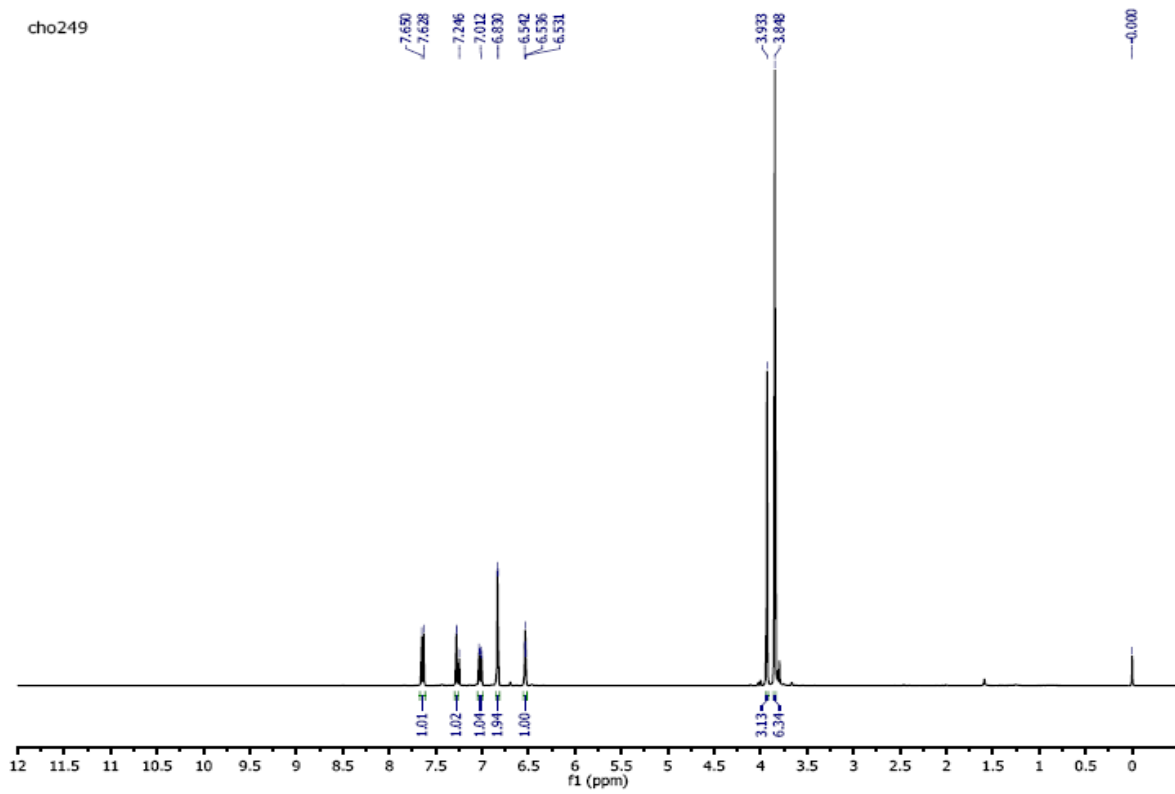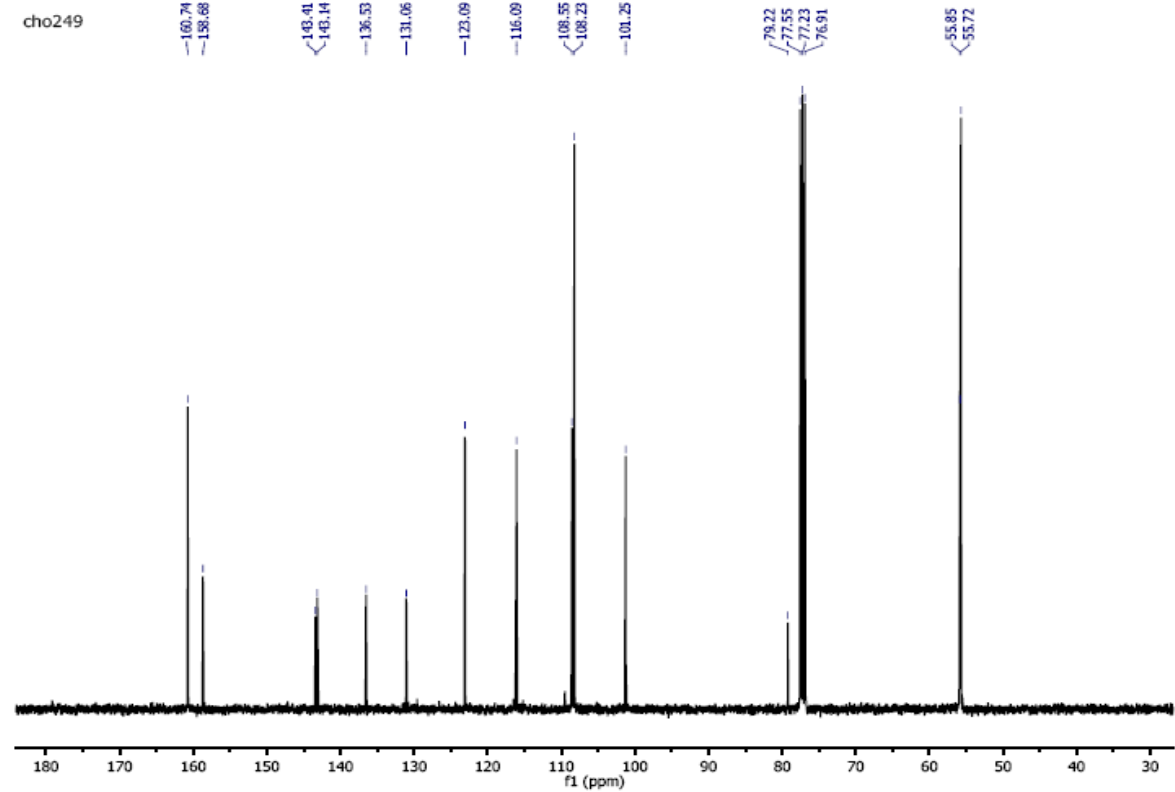

# 3-Iodobenzo[b]thiophene 4{9}

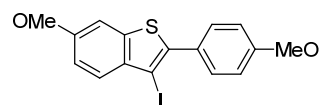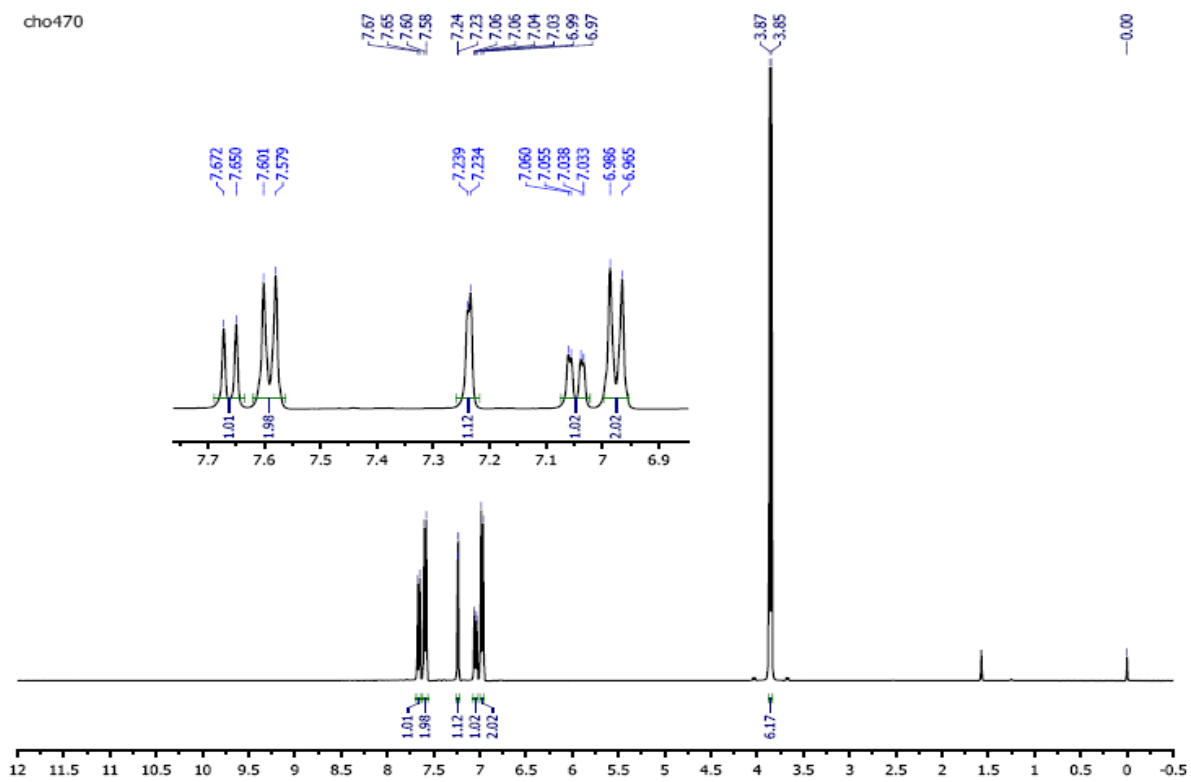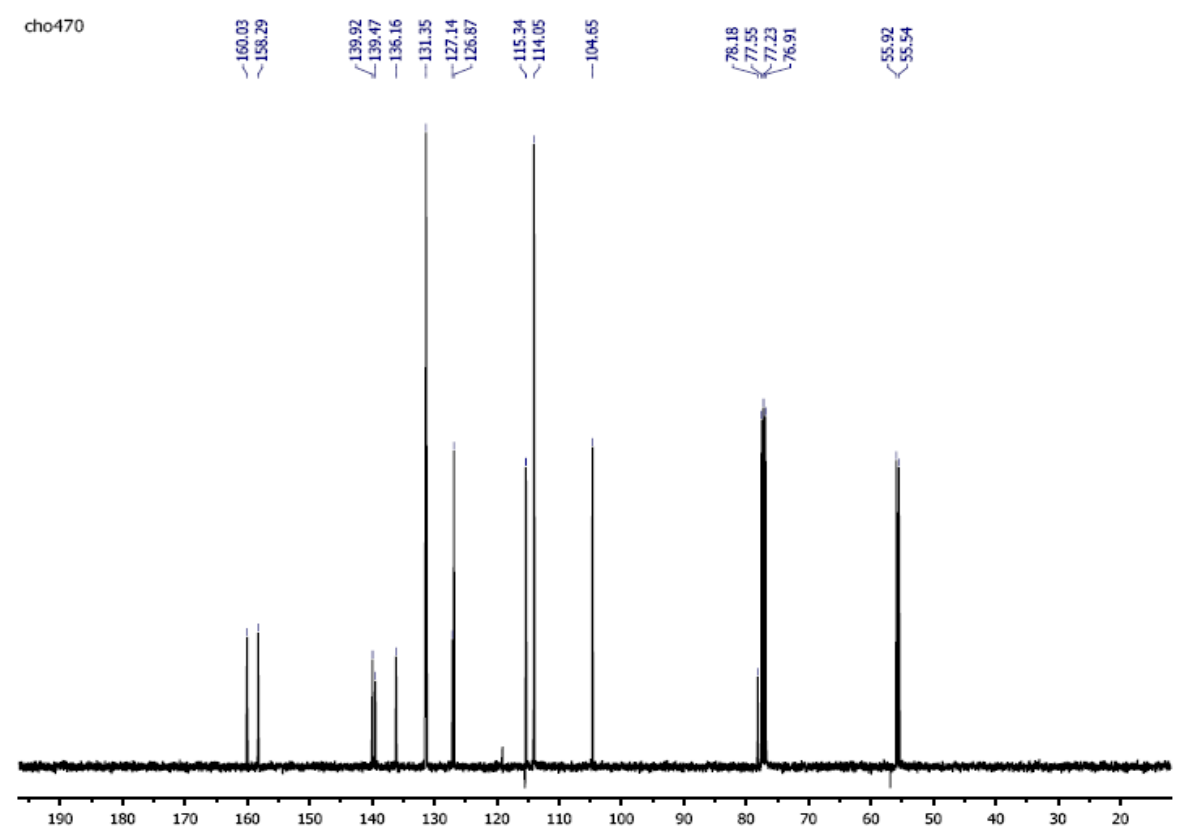

### 3-Iodobenzo[*b*]thiophene 4{10}

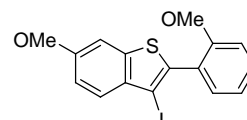

cho489

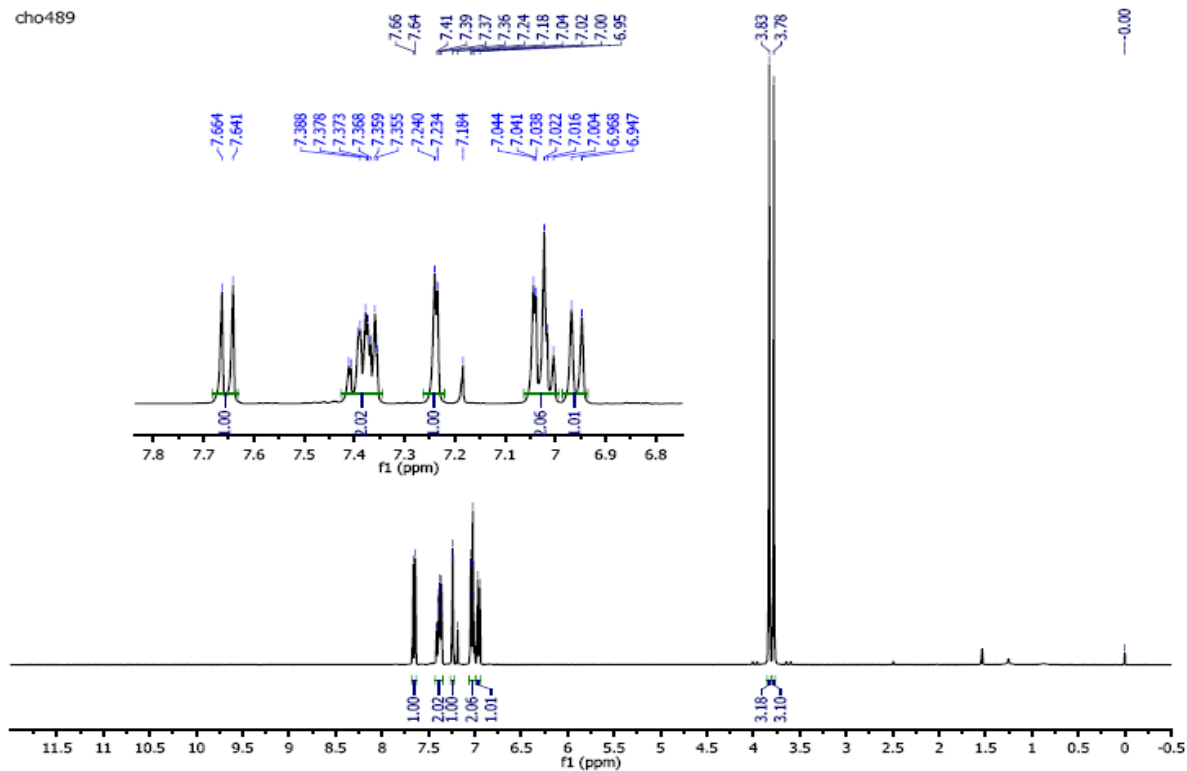

cho489

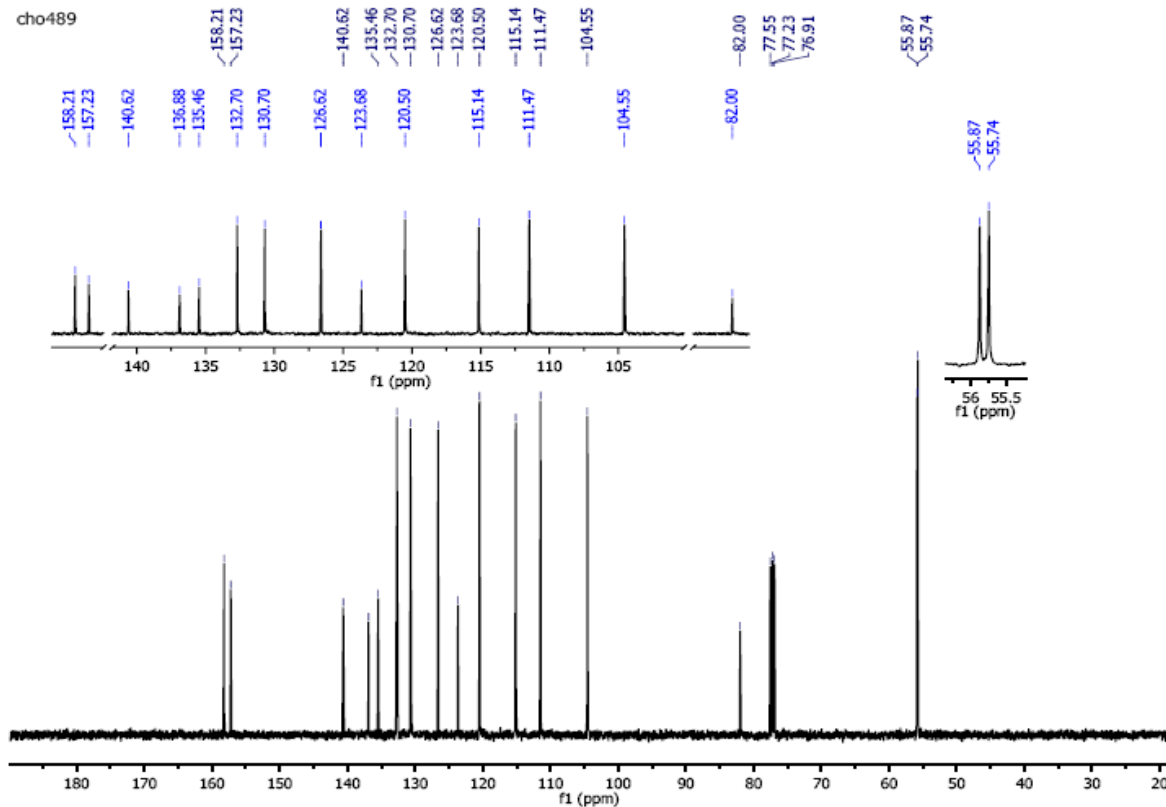

### 3-Iodobenzo[b]thiophene 4{11}

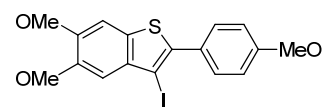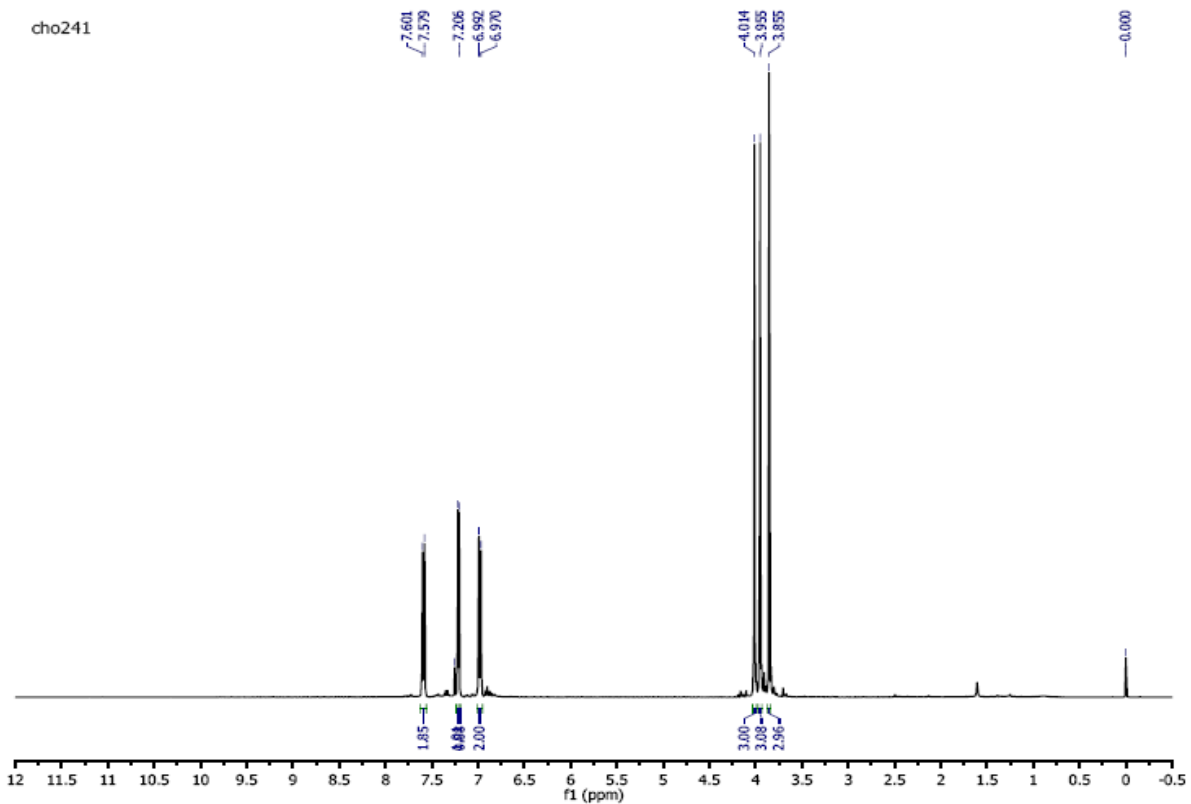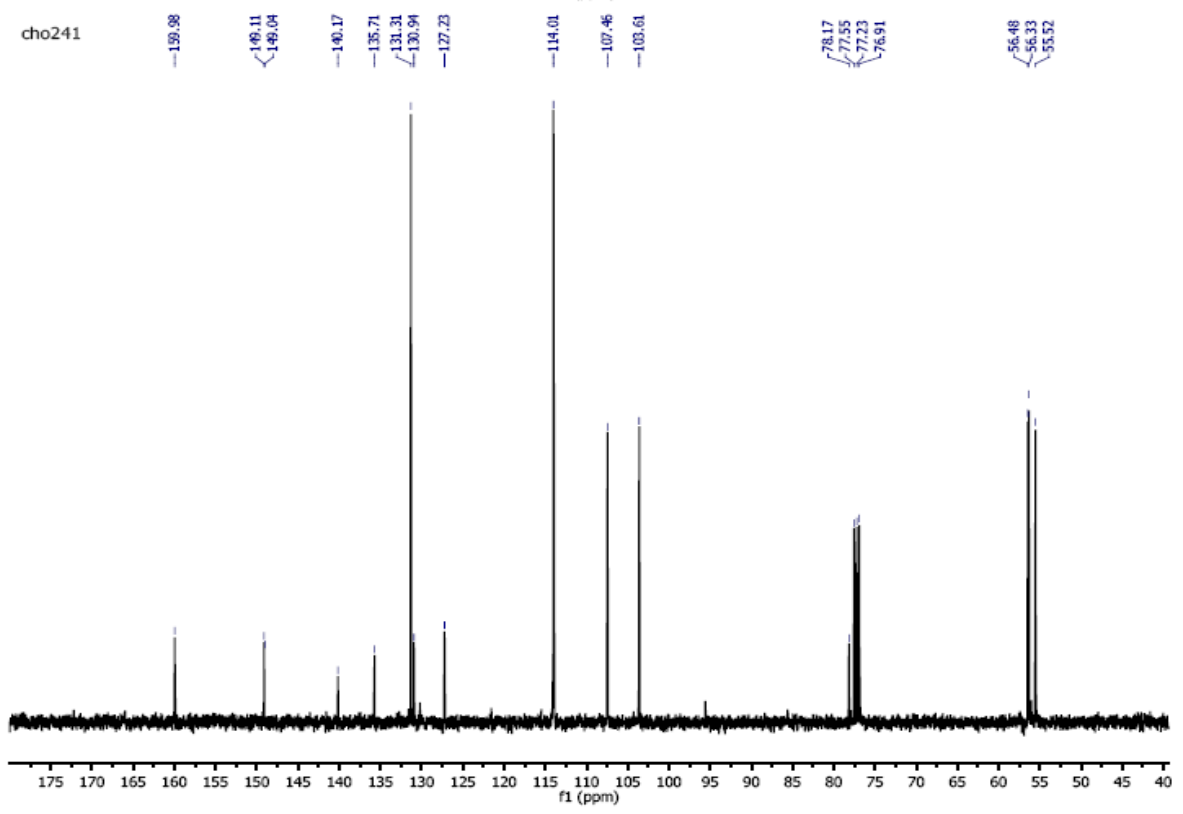

### 3-Iodobenzo[b]thiophene 4{12}

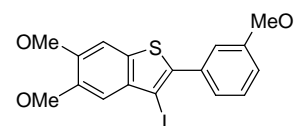

cho658

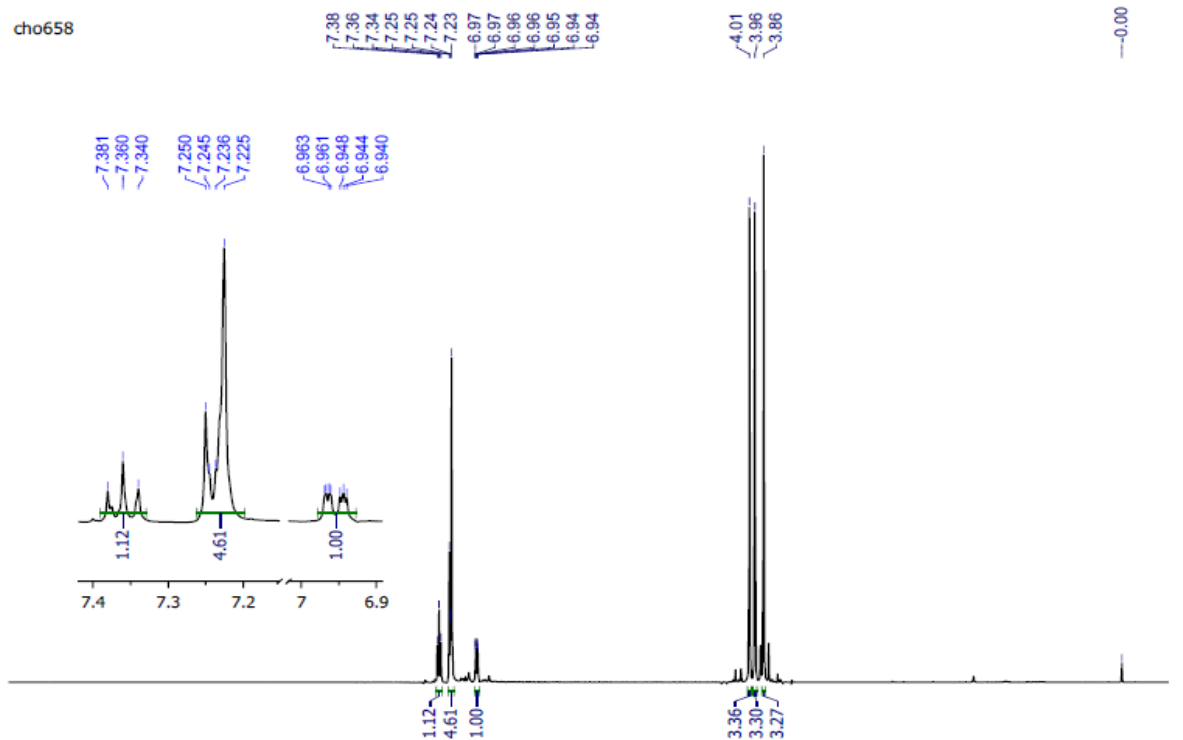

cho658

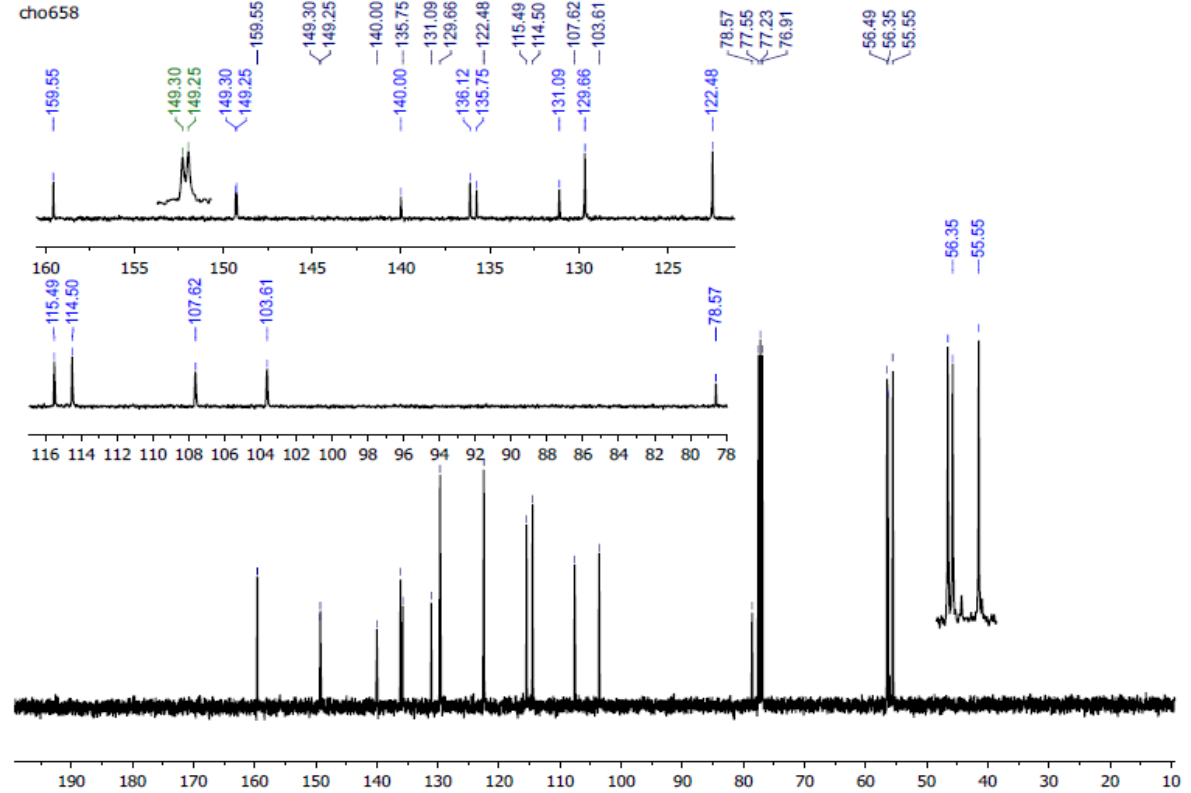

### 3-Iodobenzo[*b*]thiophene 4{13}

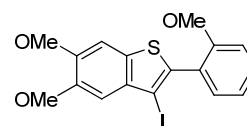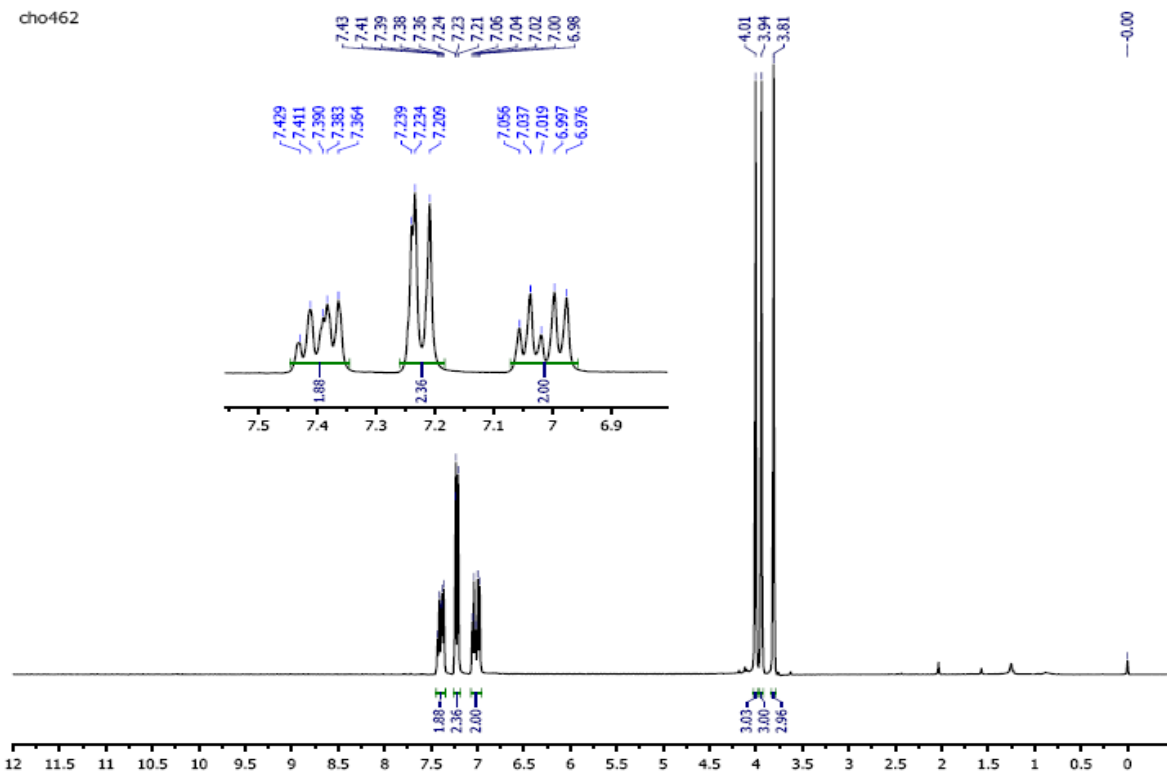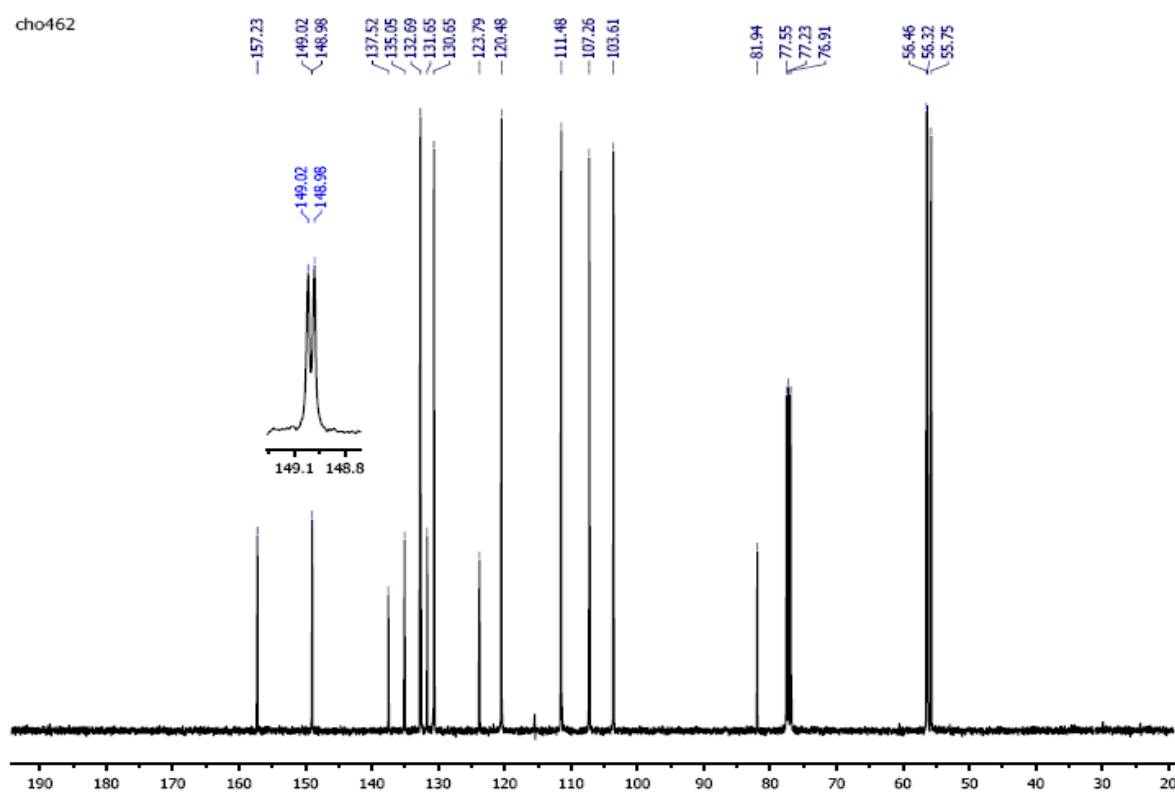

# 3-Iodobenzo[b]thiophene 4{14}

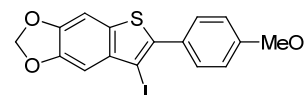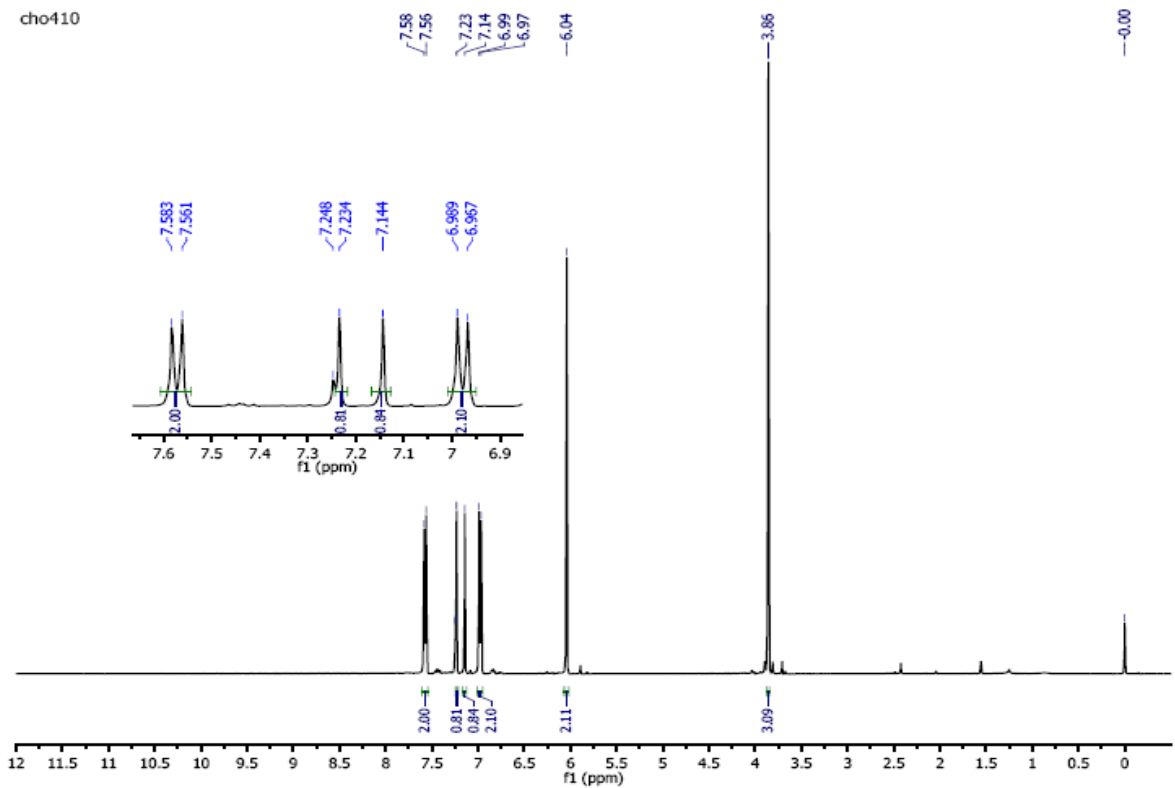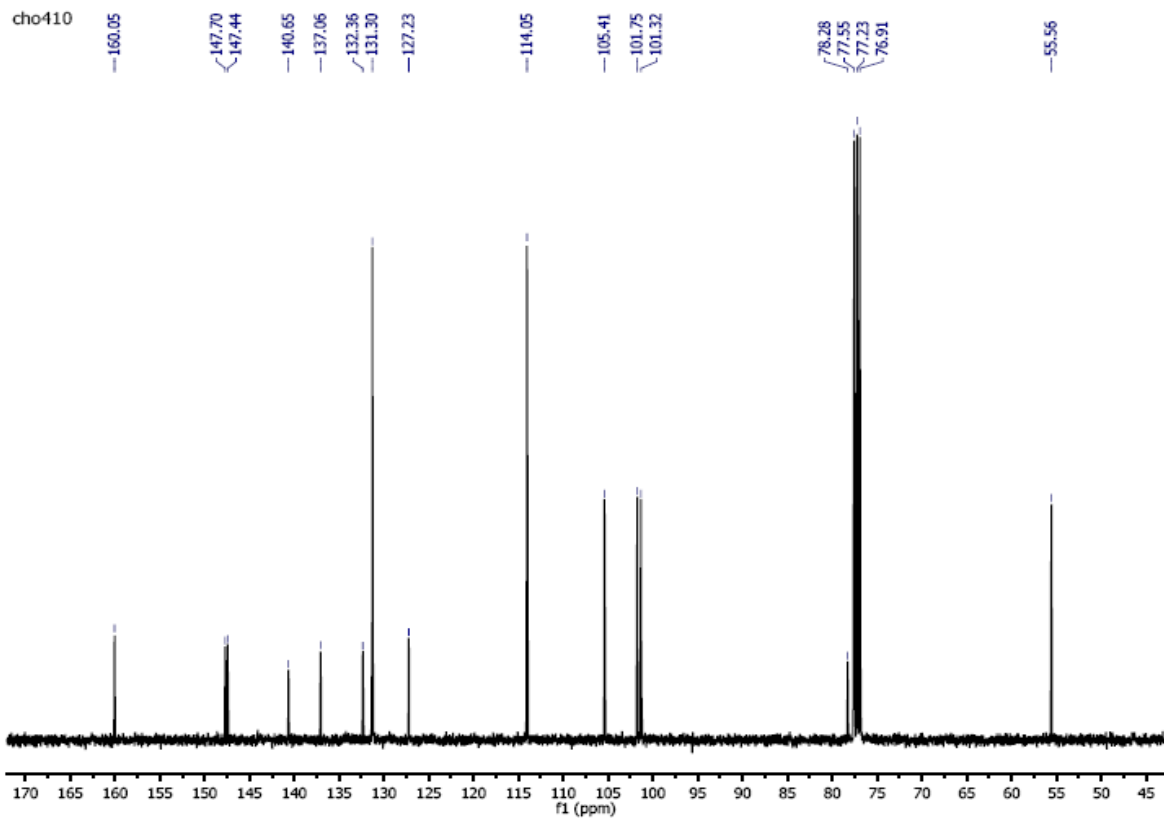



### 3-Iodobenzo[b]thiophene 4{15}

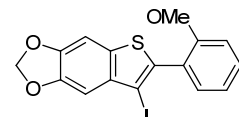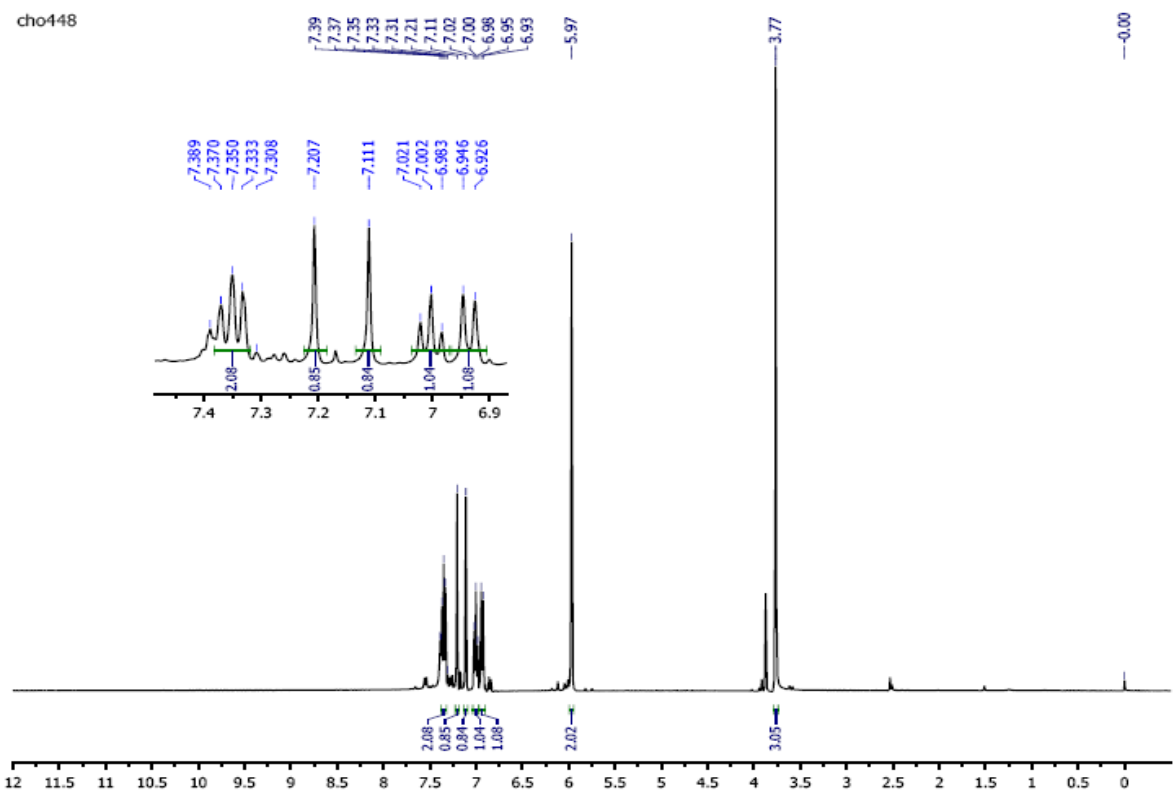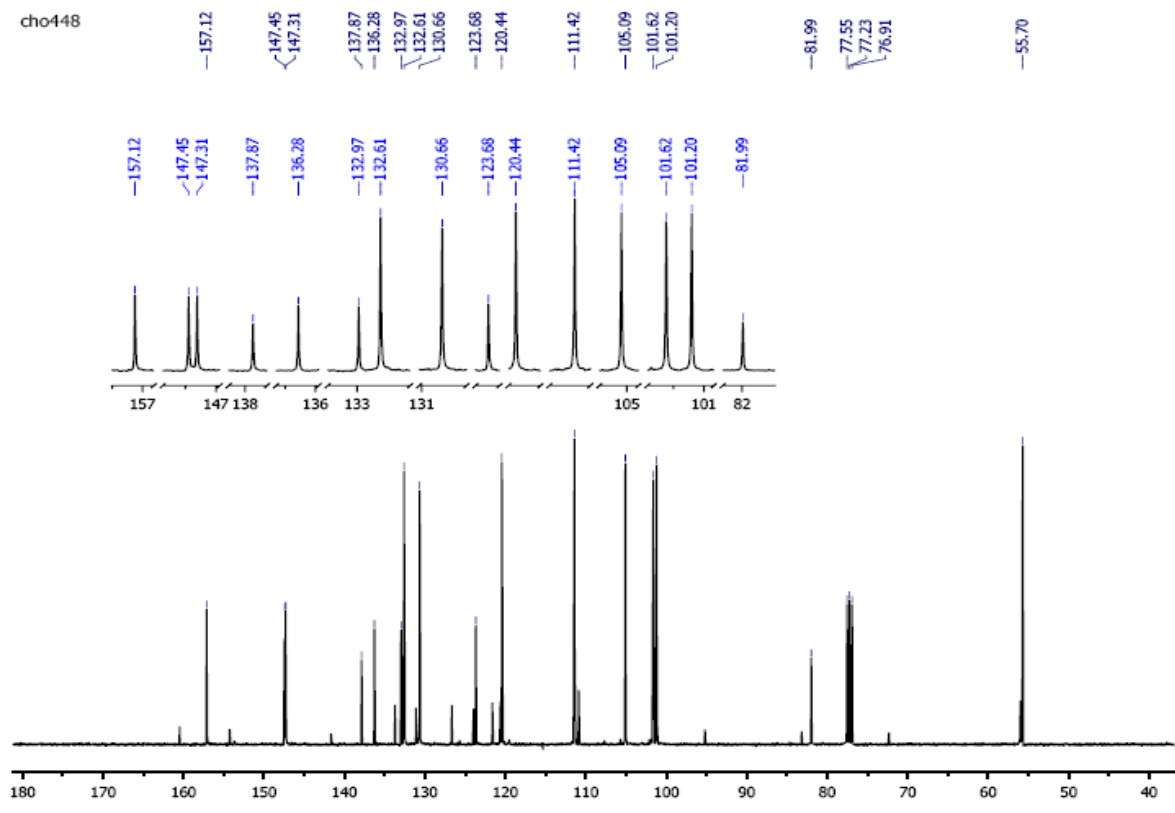

Compound 5{2}

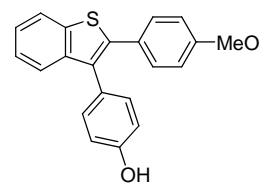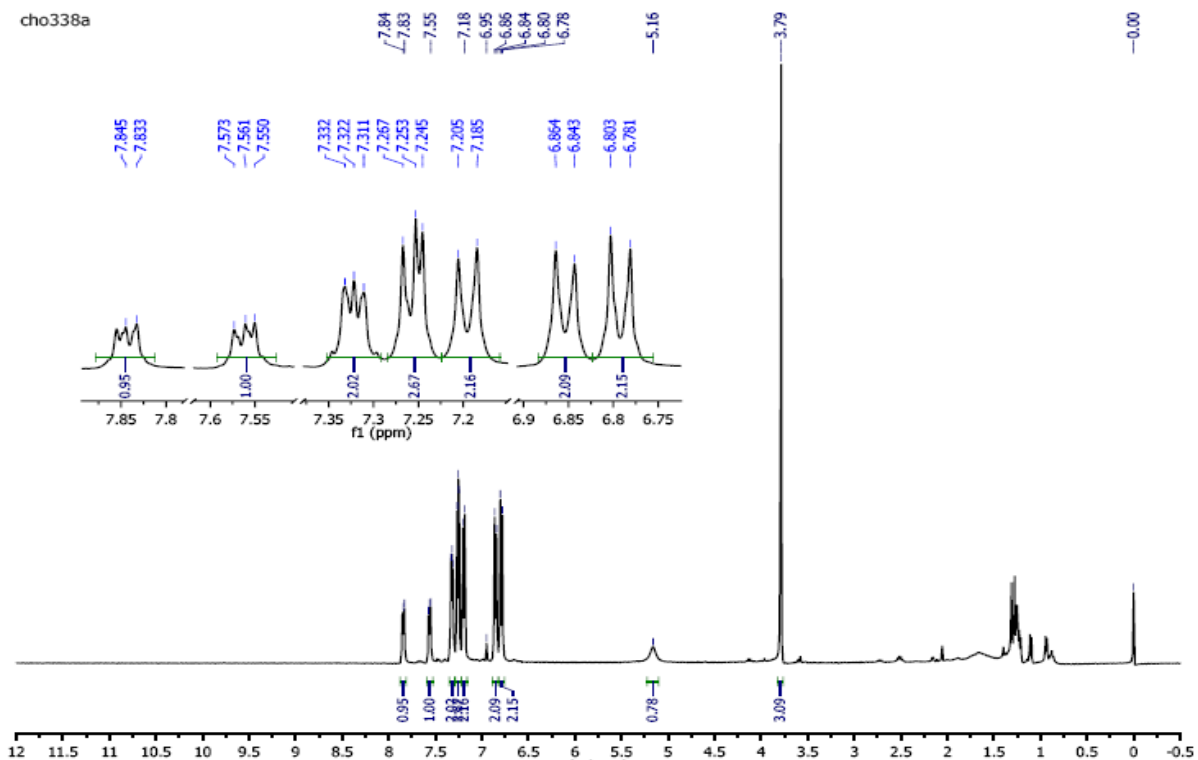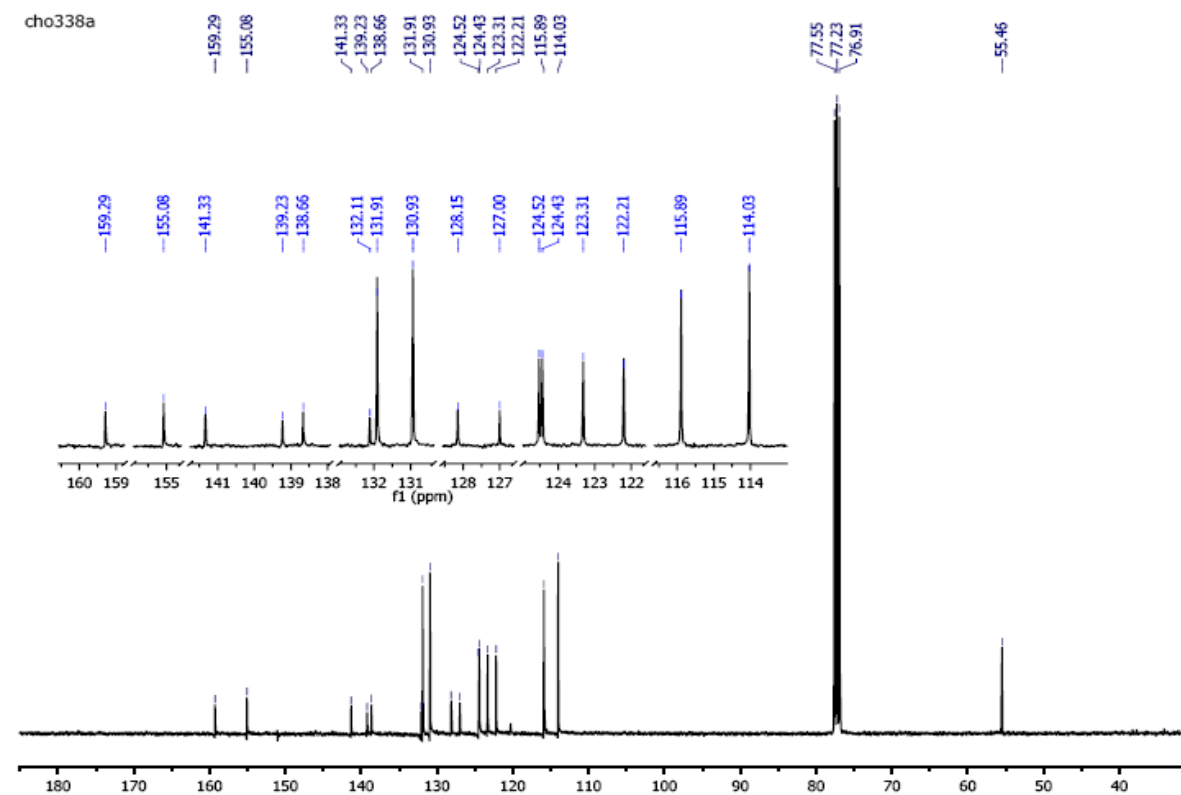

Compound 5{3}

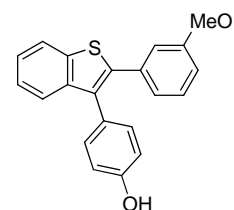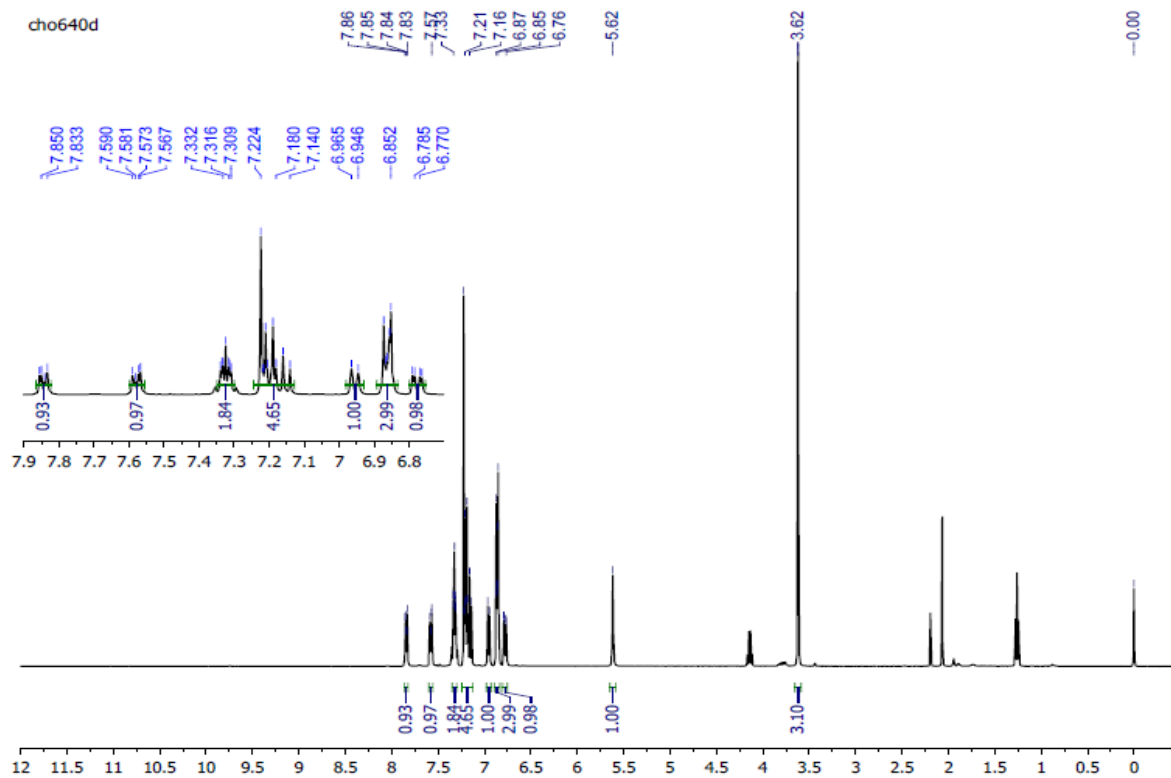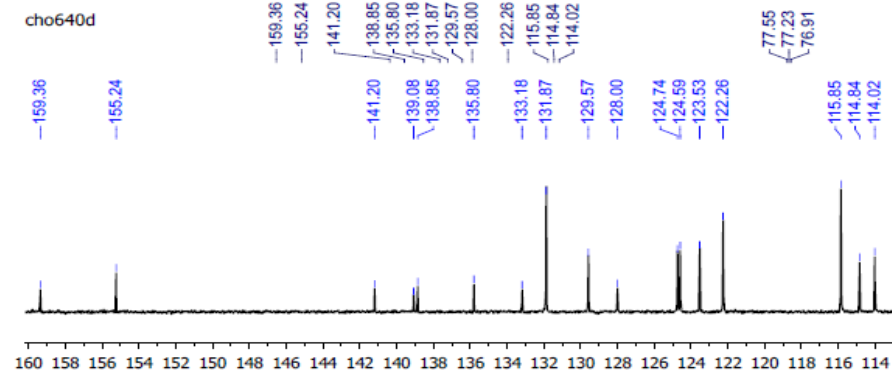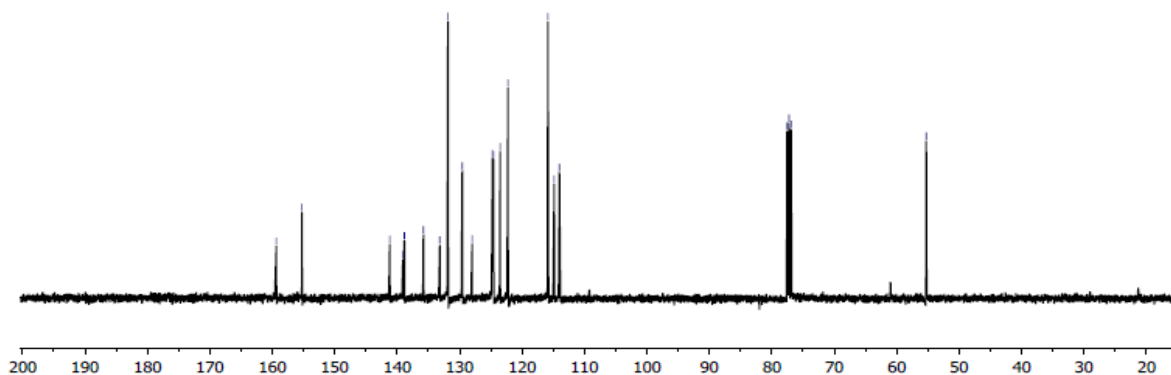

Compound 5{4}

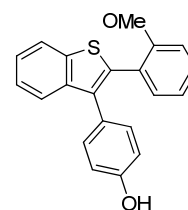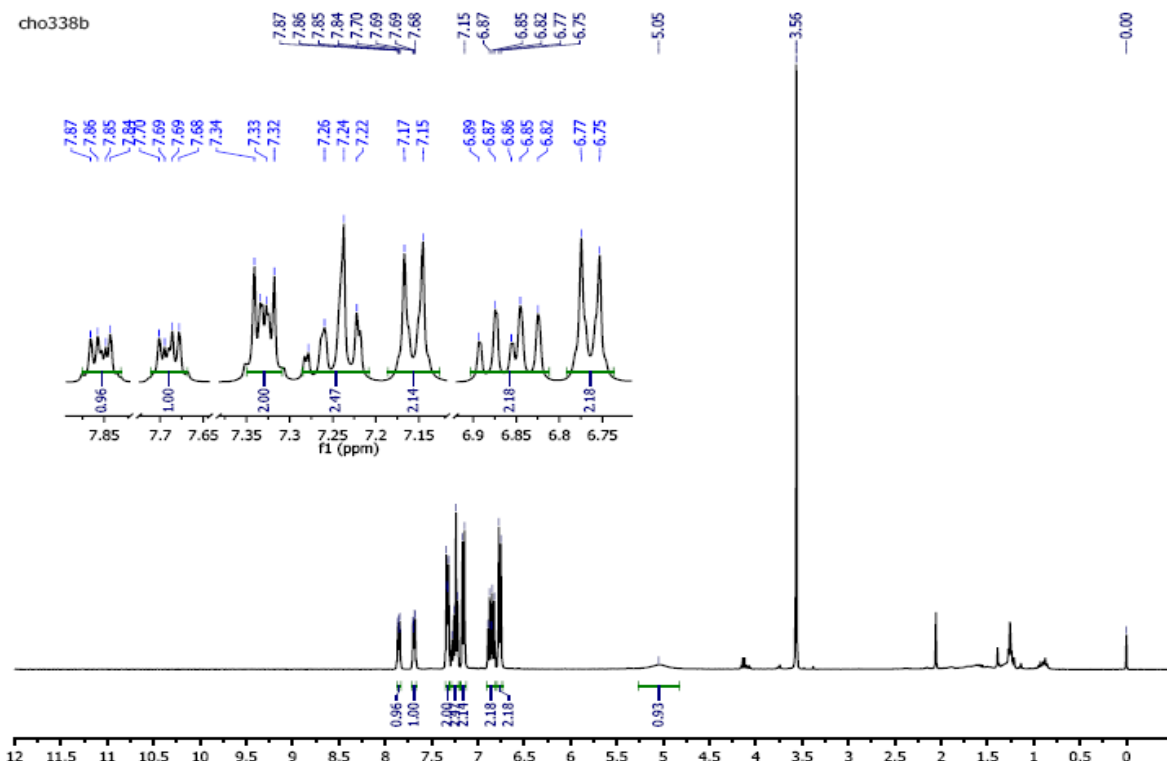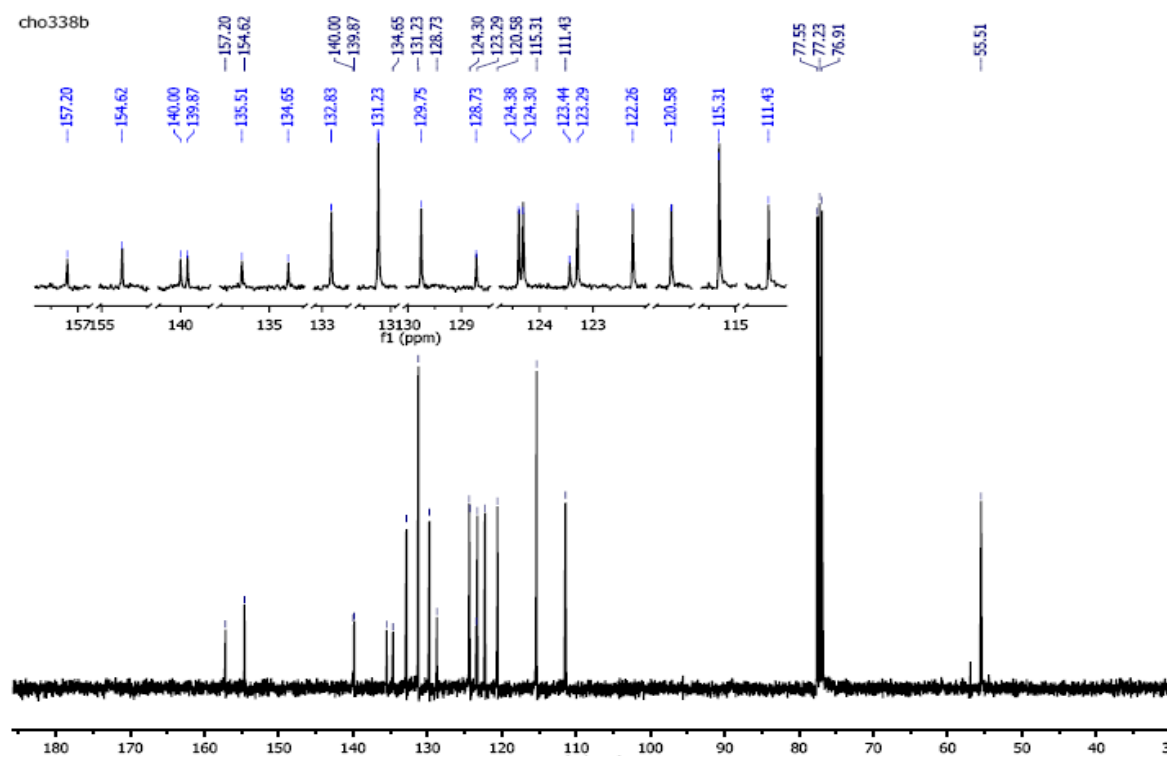

Compound 5{5}

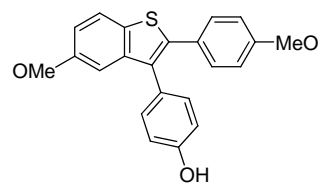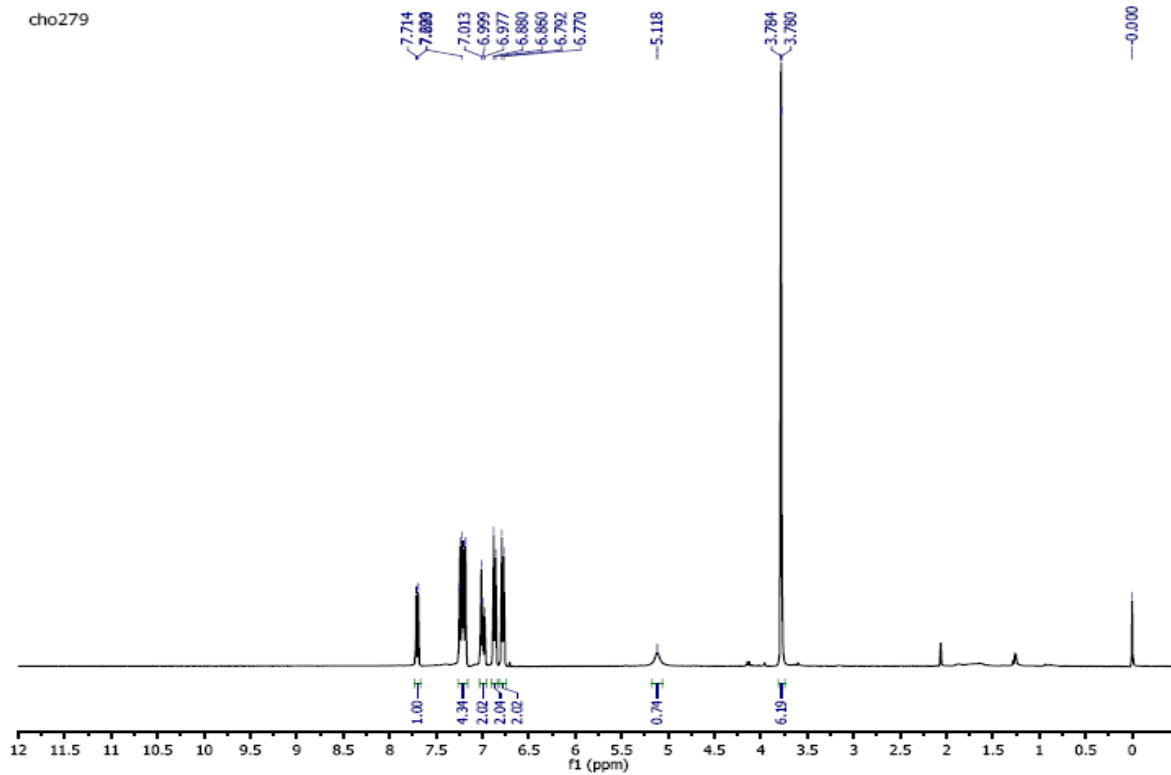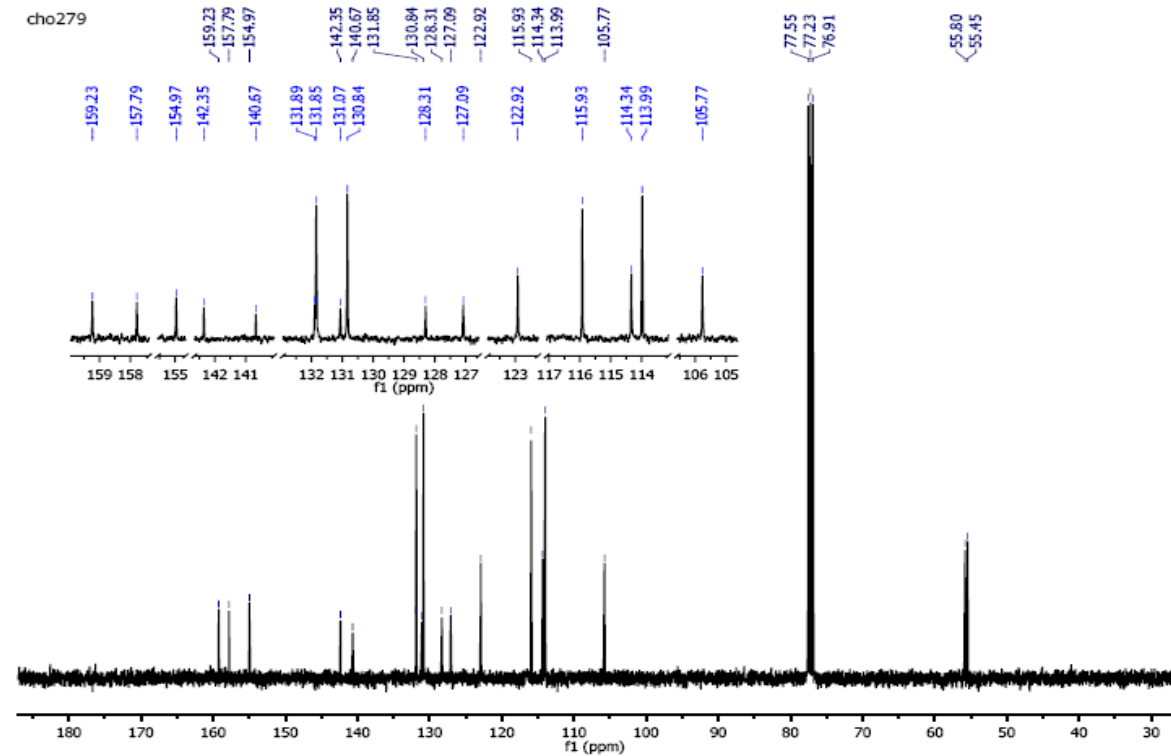

Compound 5{6}

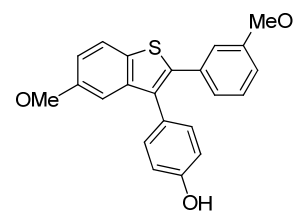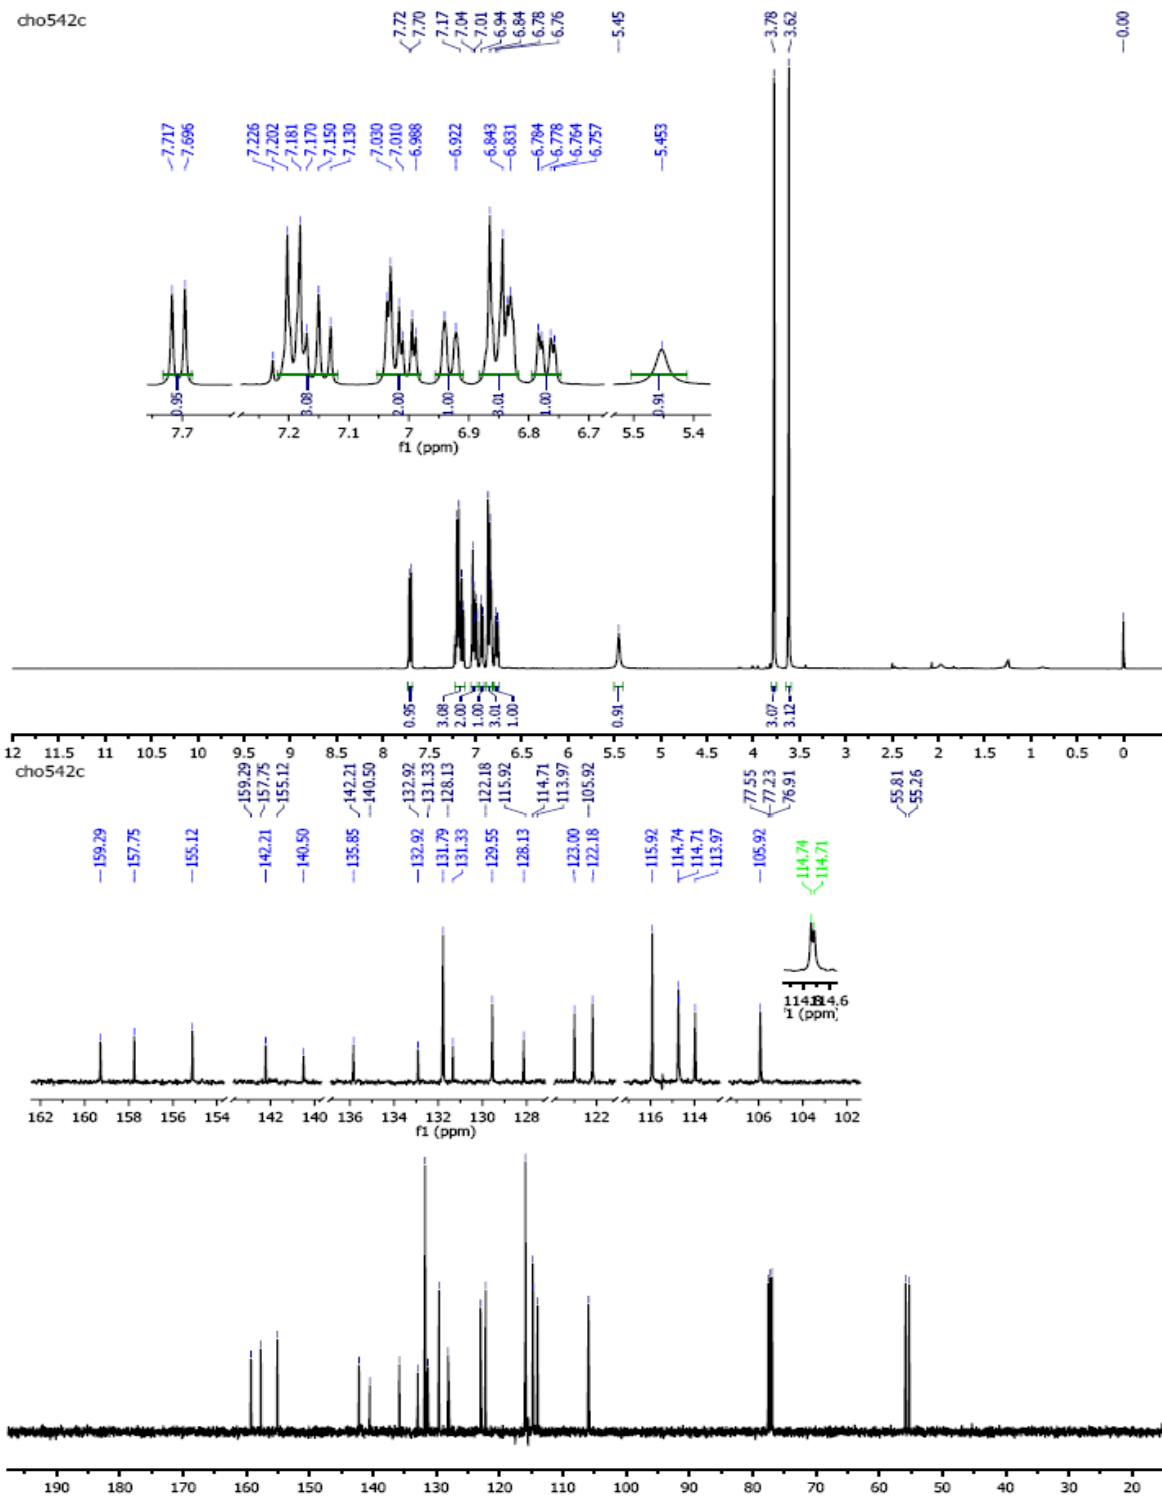

Compound 5{7}

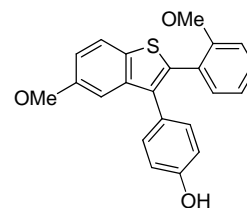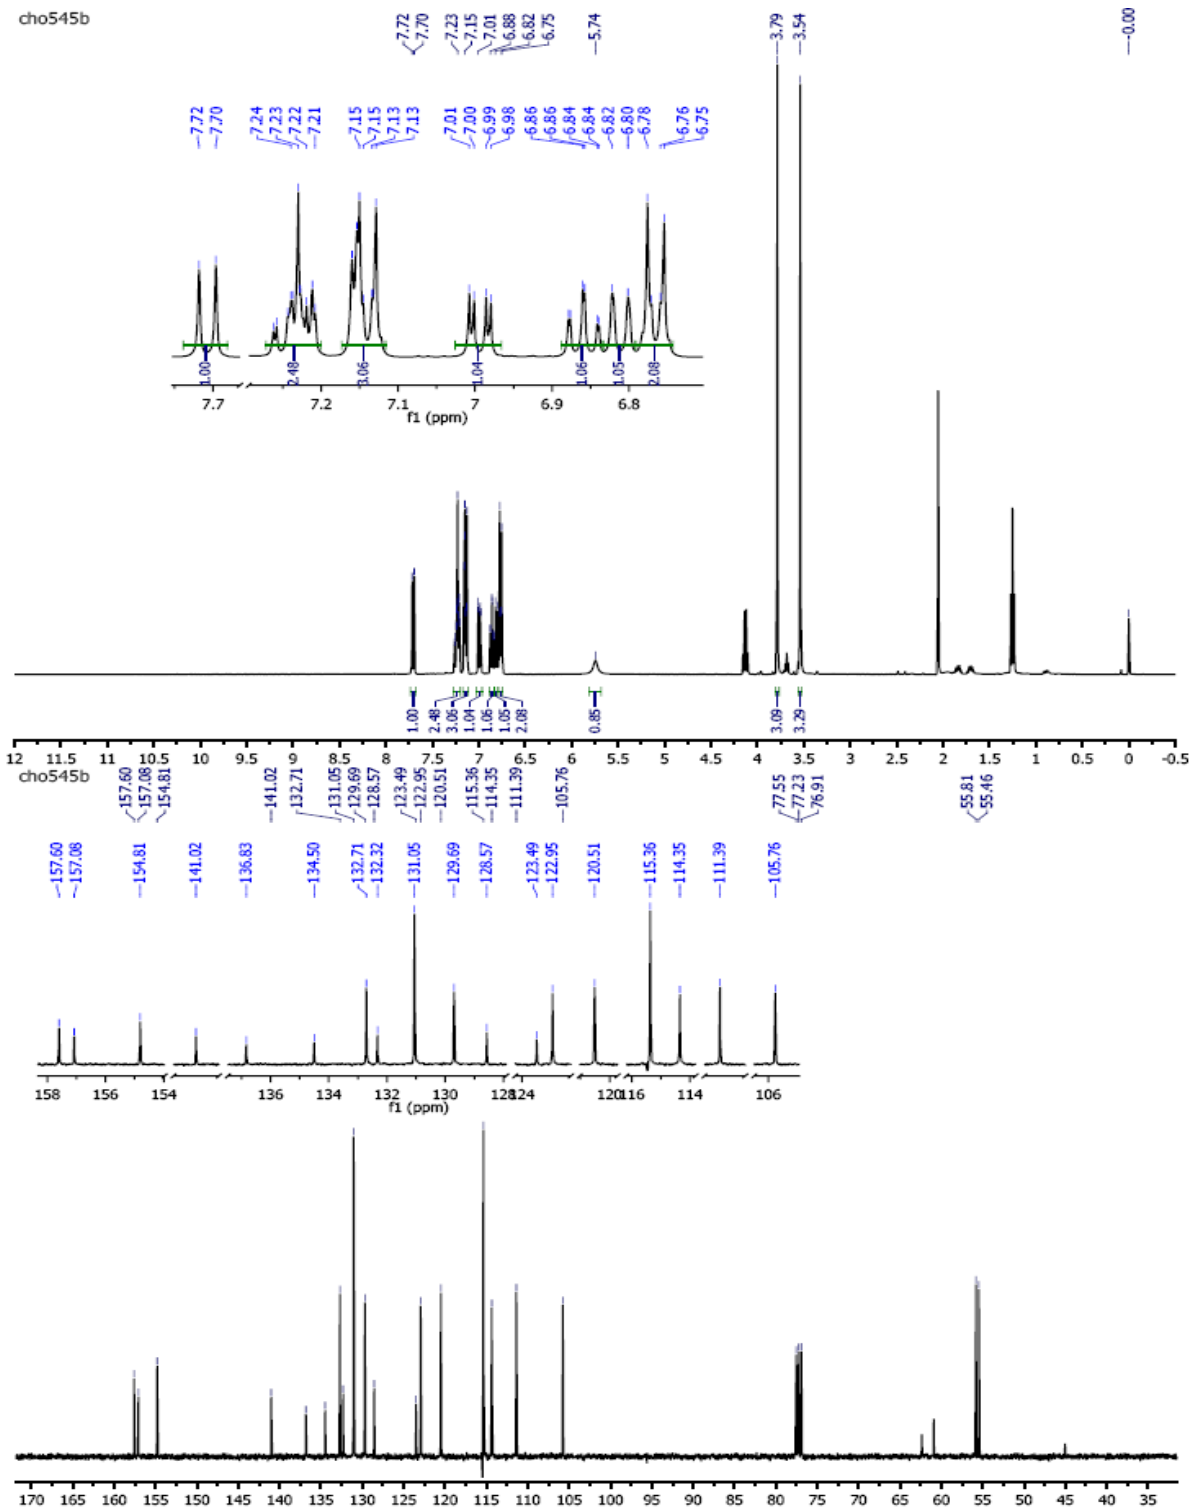

Compound 5{8}

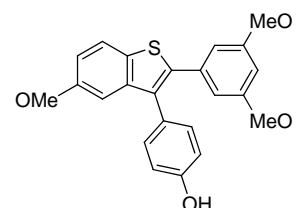

cho327a

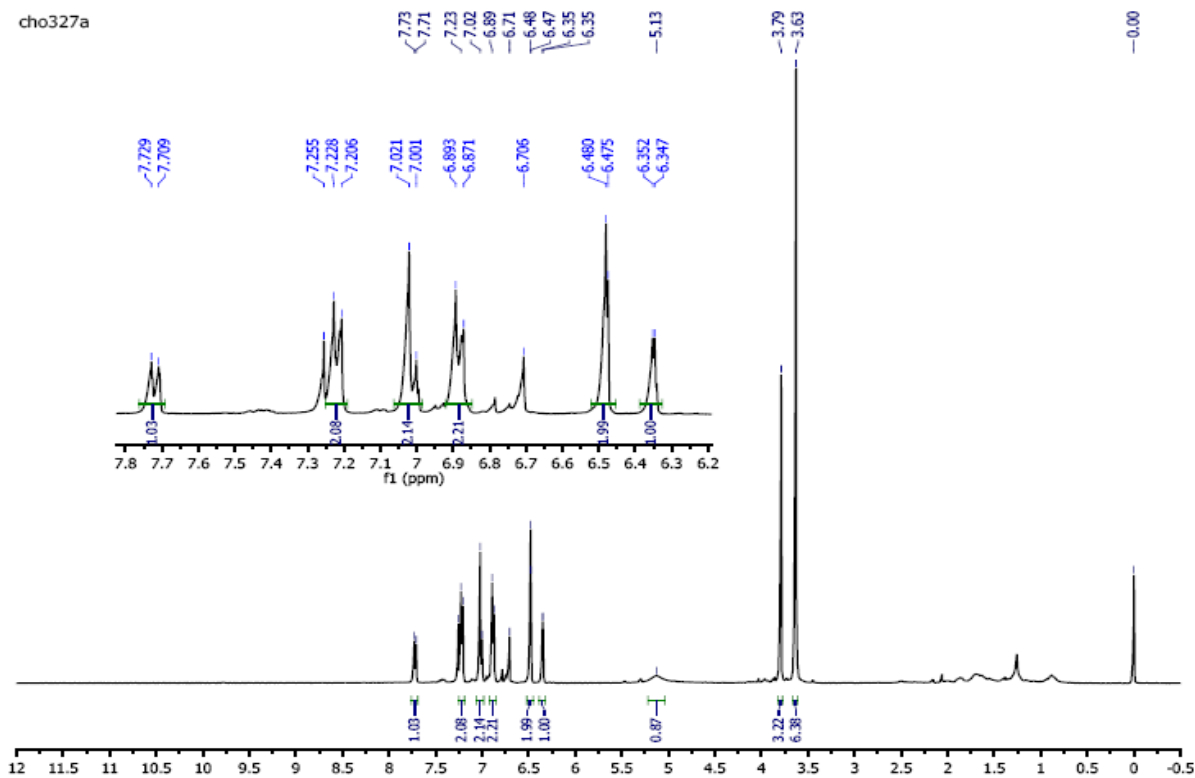

cho547

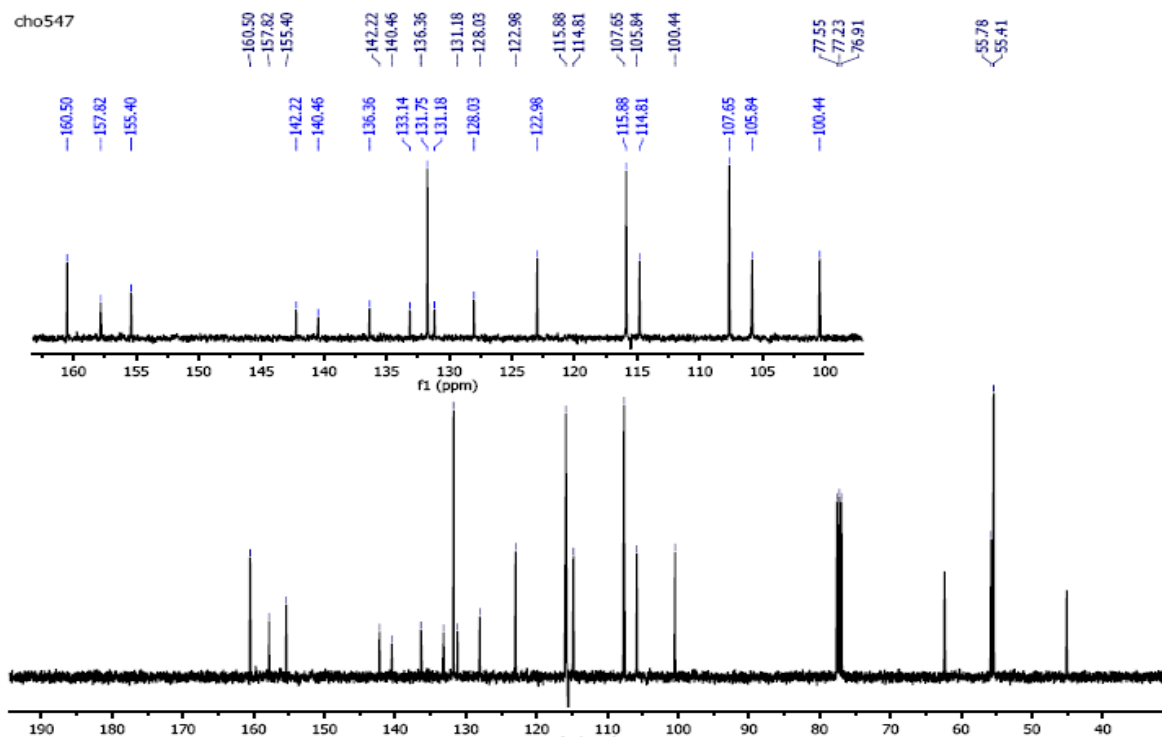



Compound 5{9}

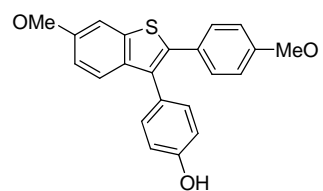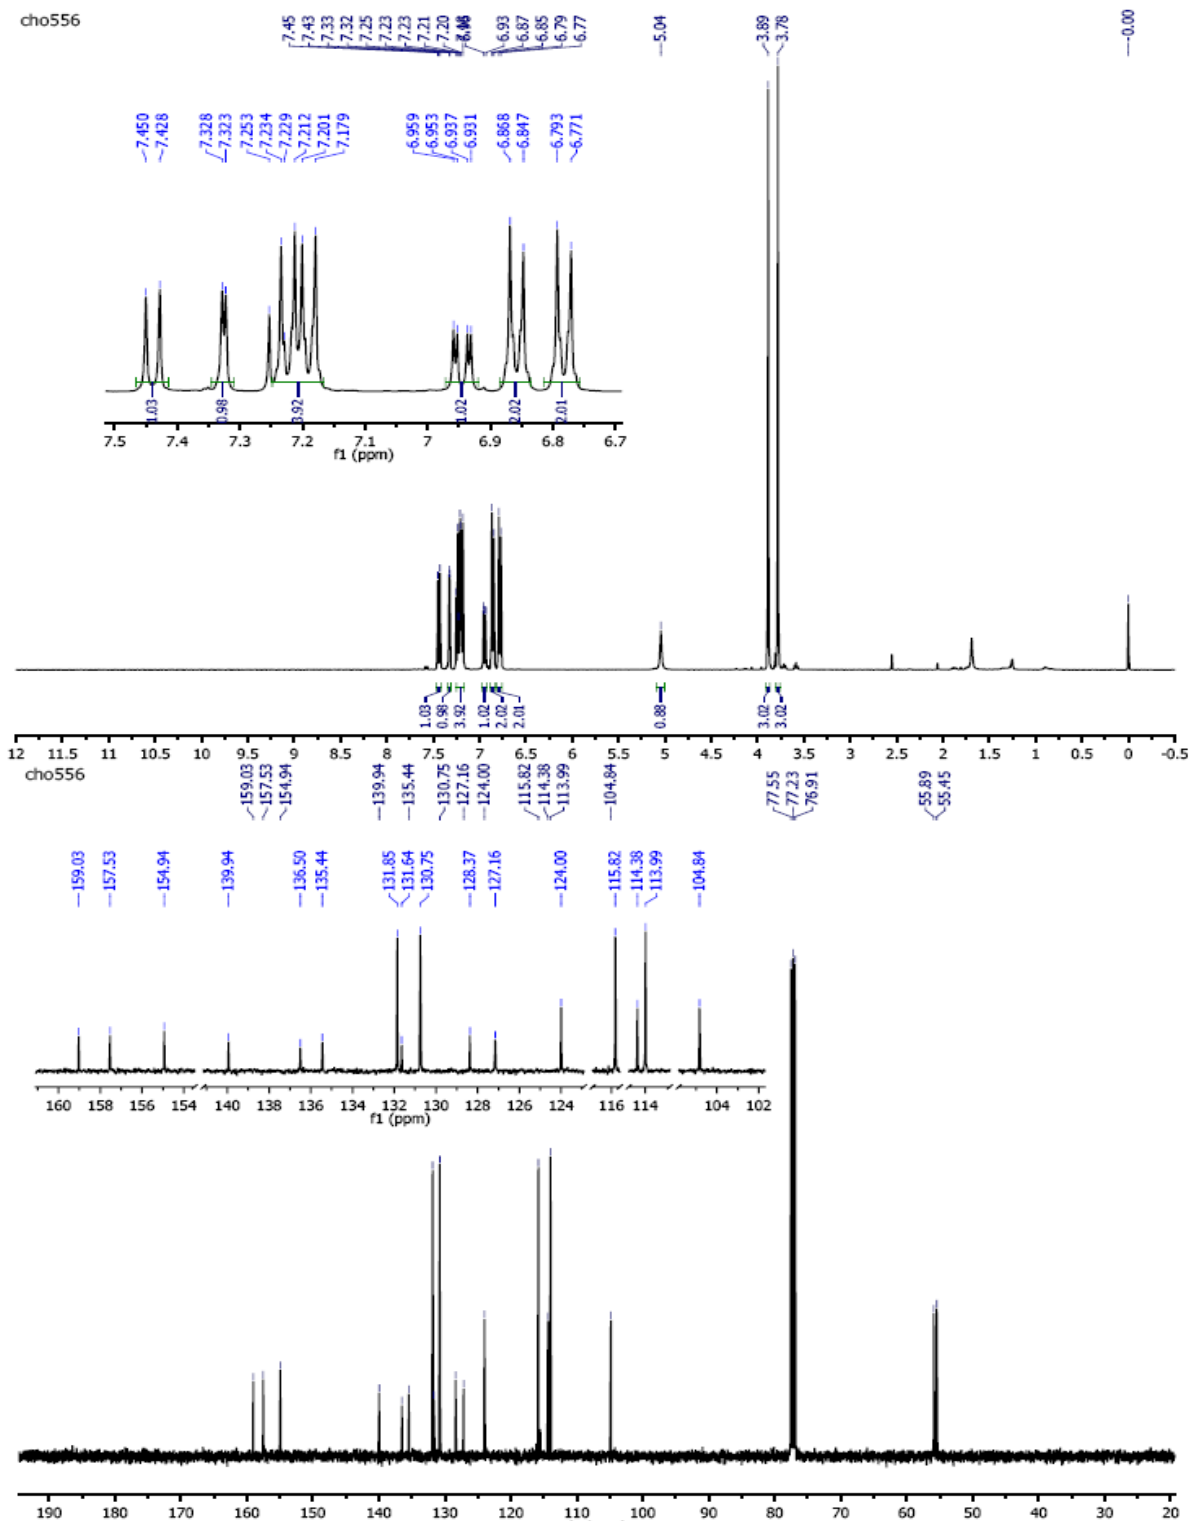

Compound 5{10}

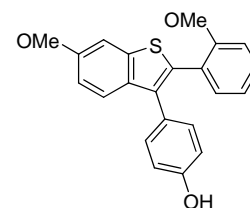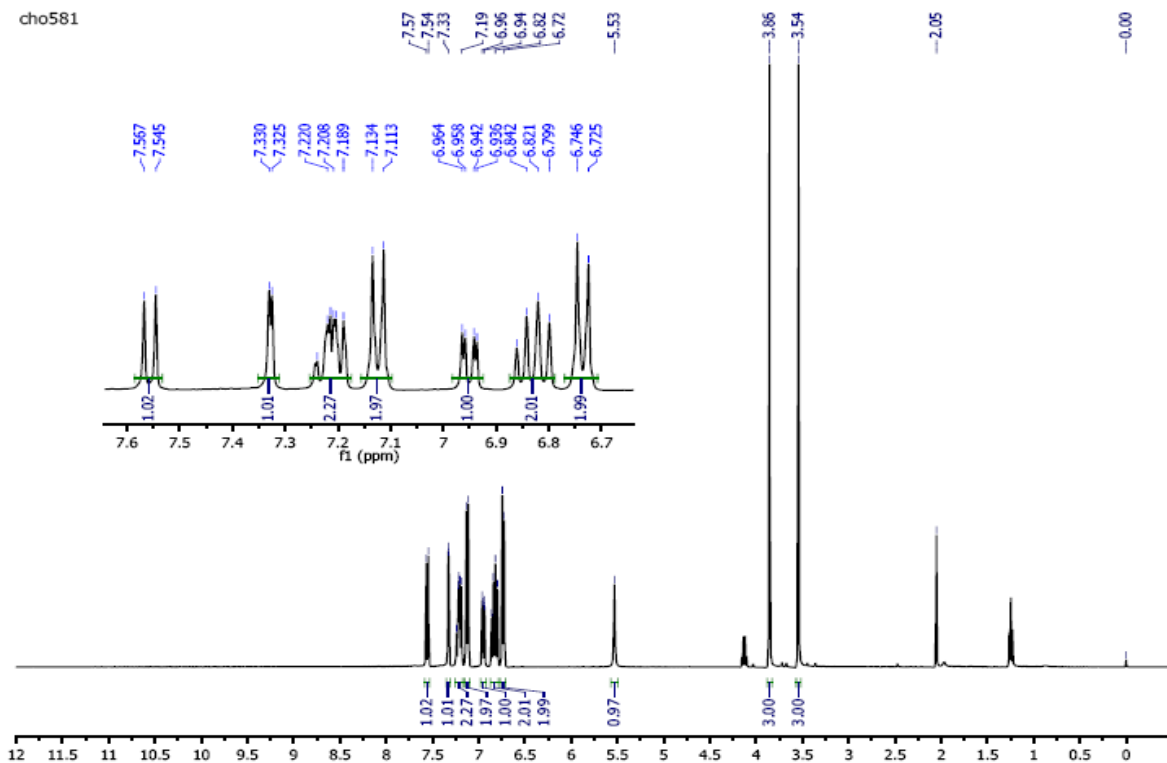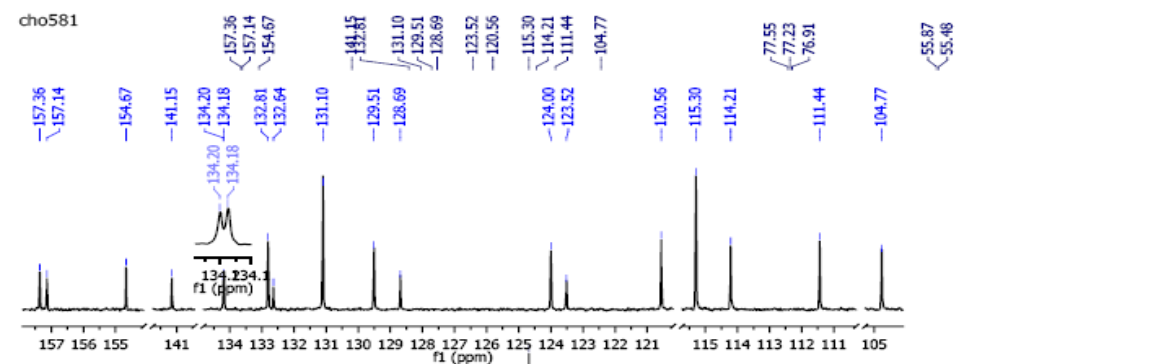

Compound 5{11}

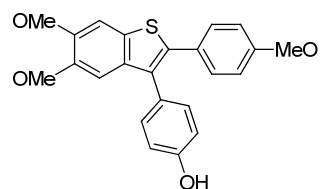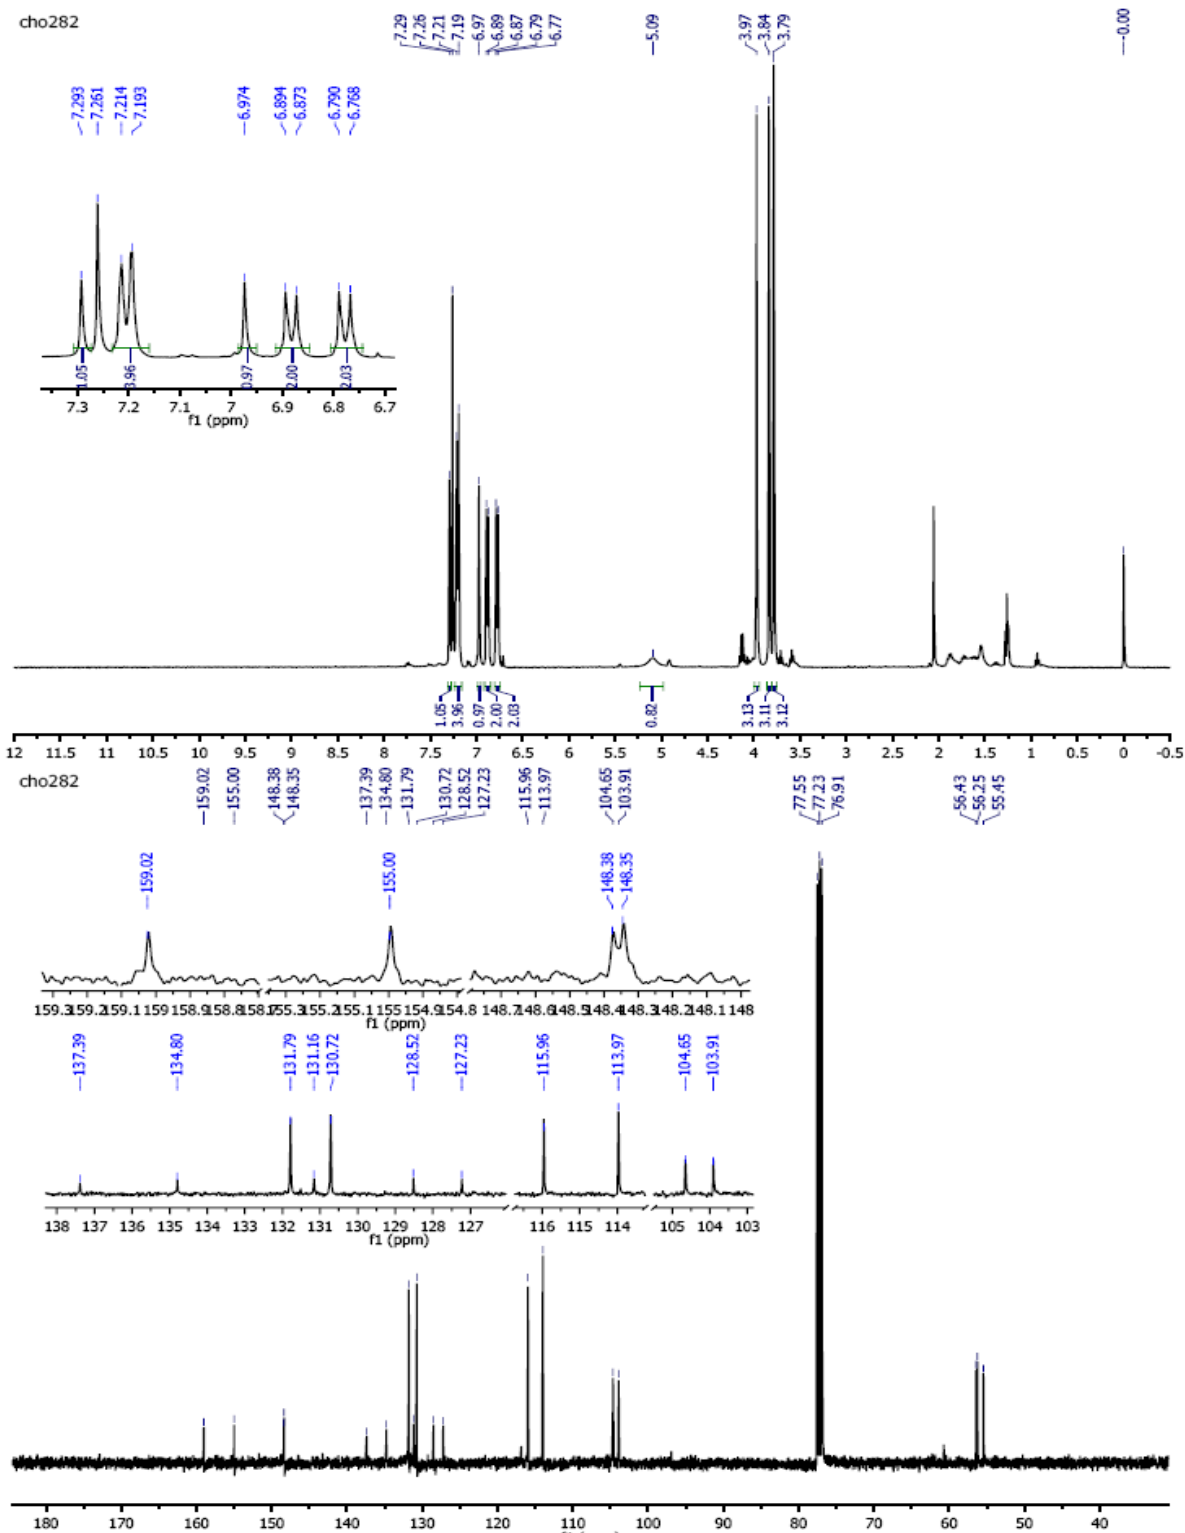

Compound 5{12}

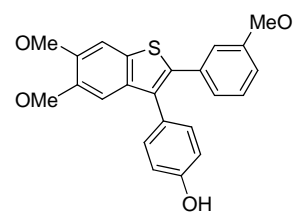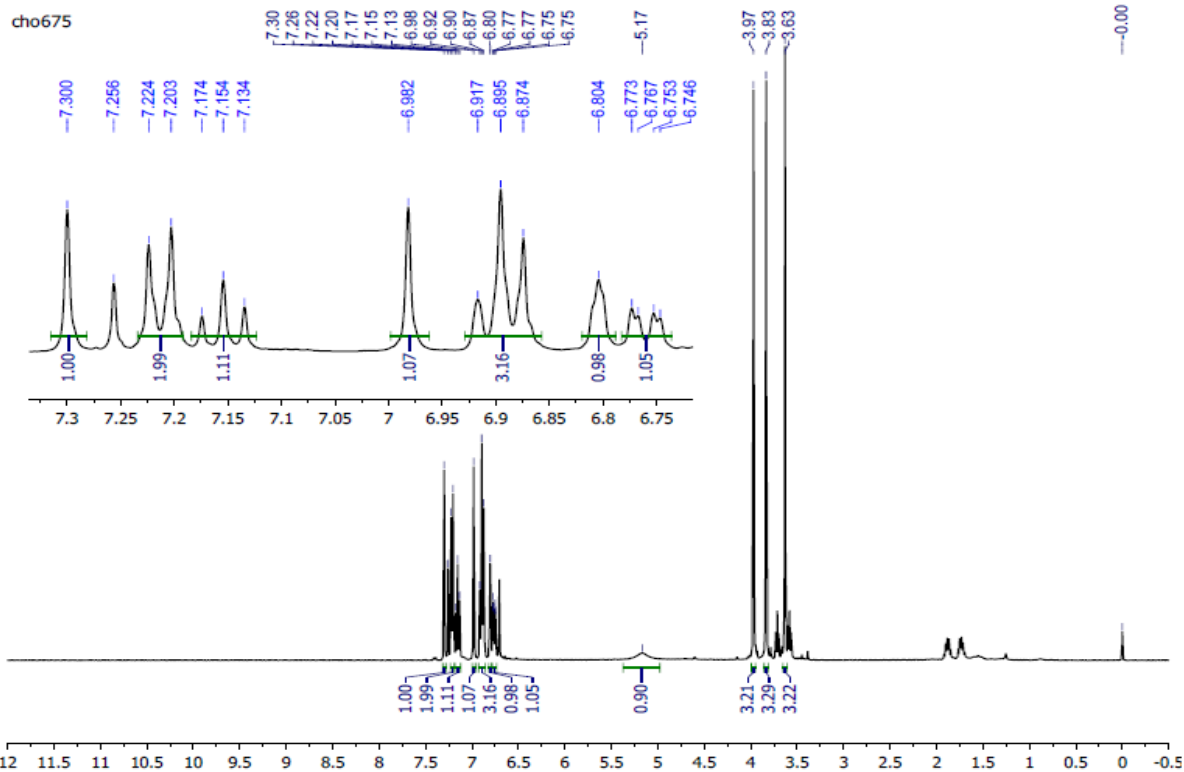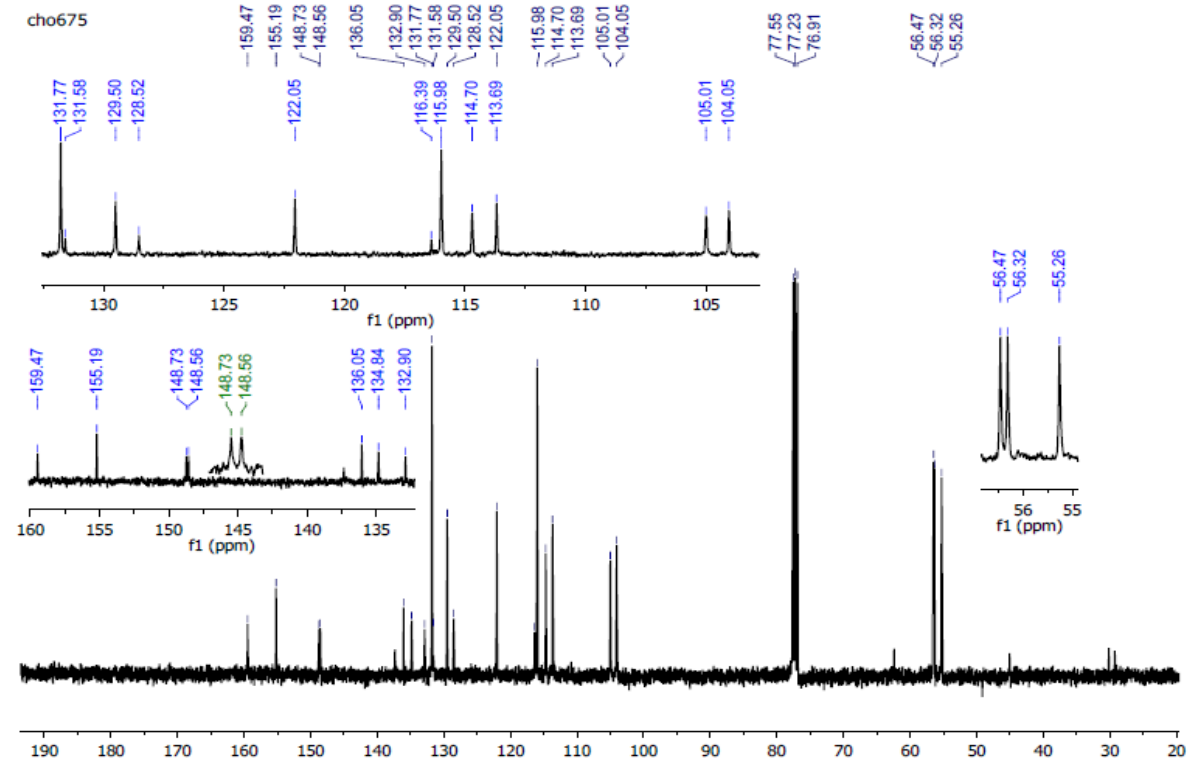

Compound 5{13}

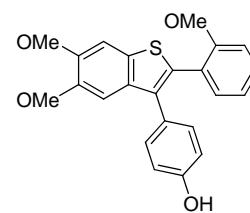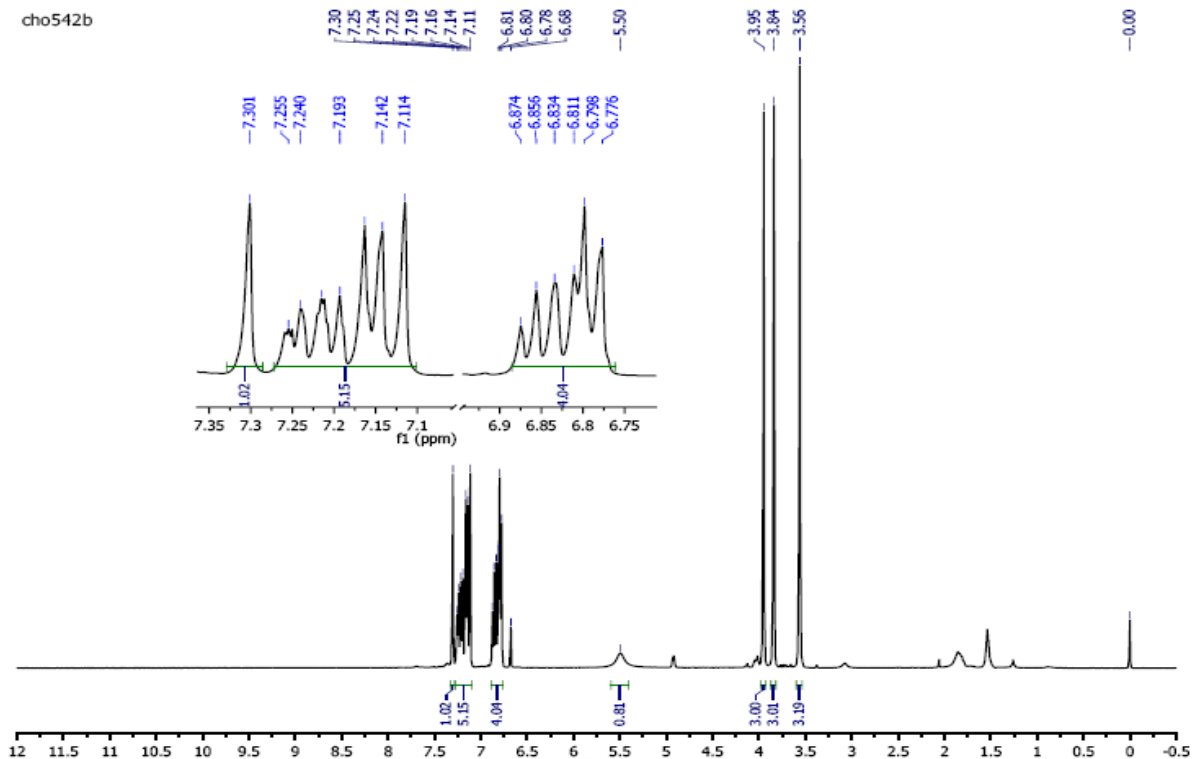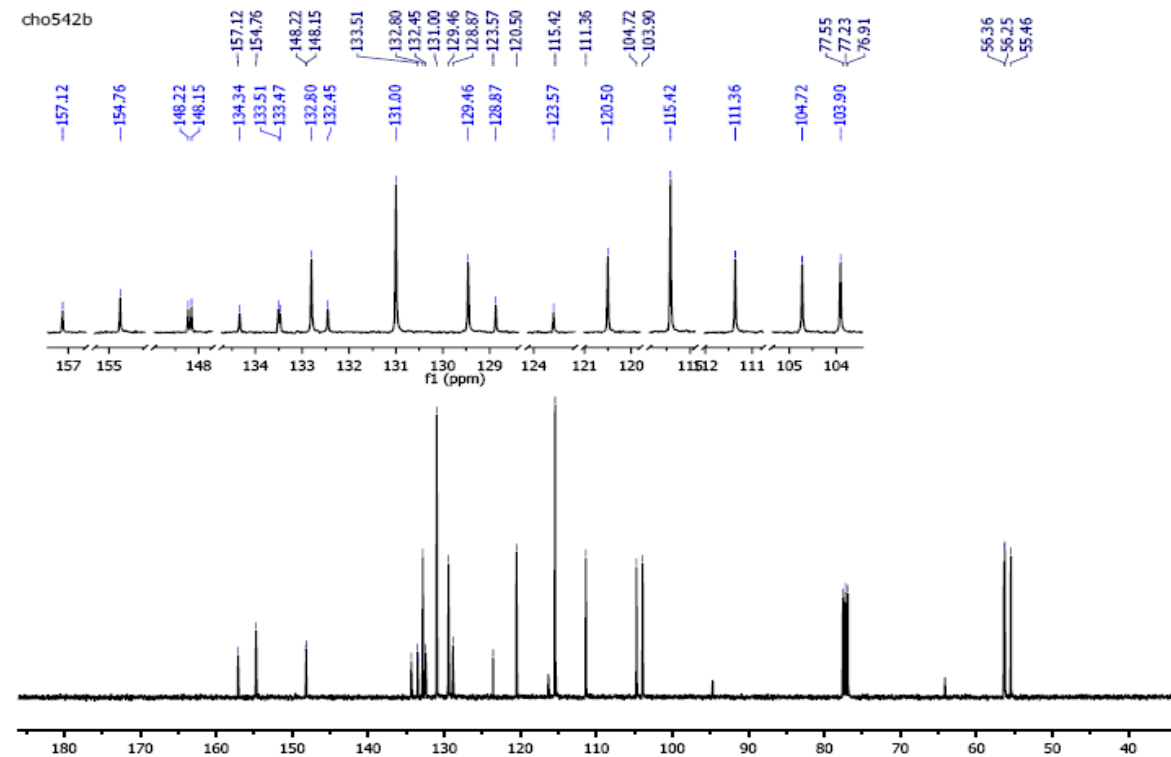

Compound 5{14}

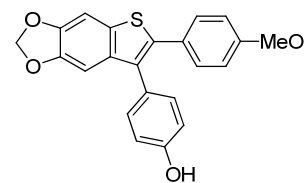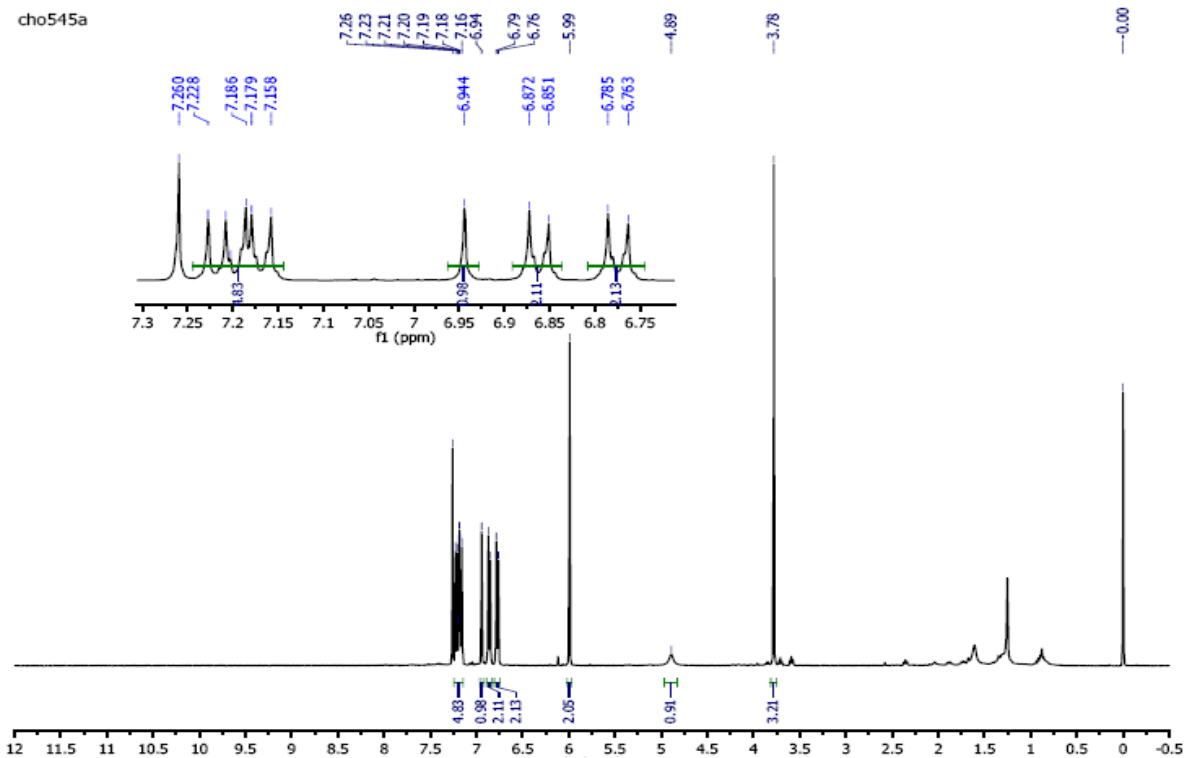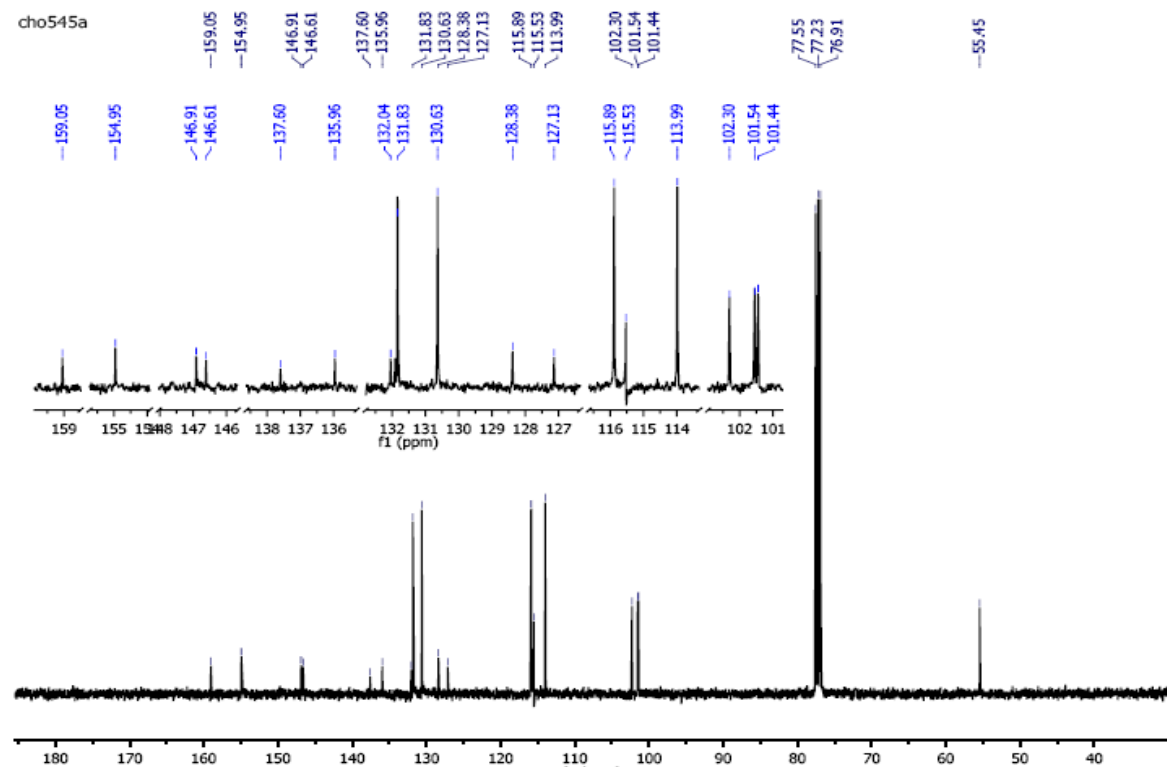

Compound 5{15}

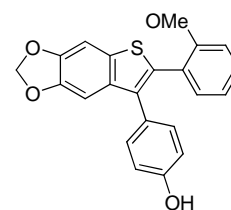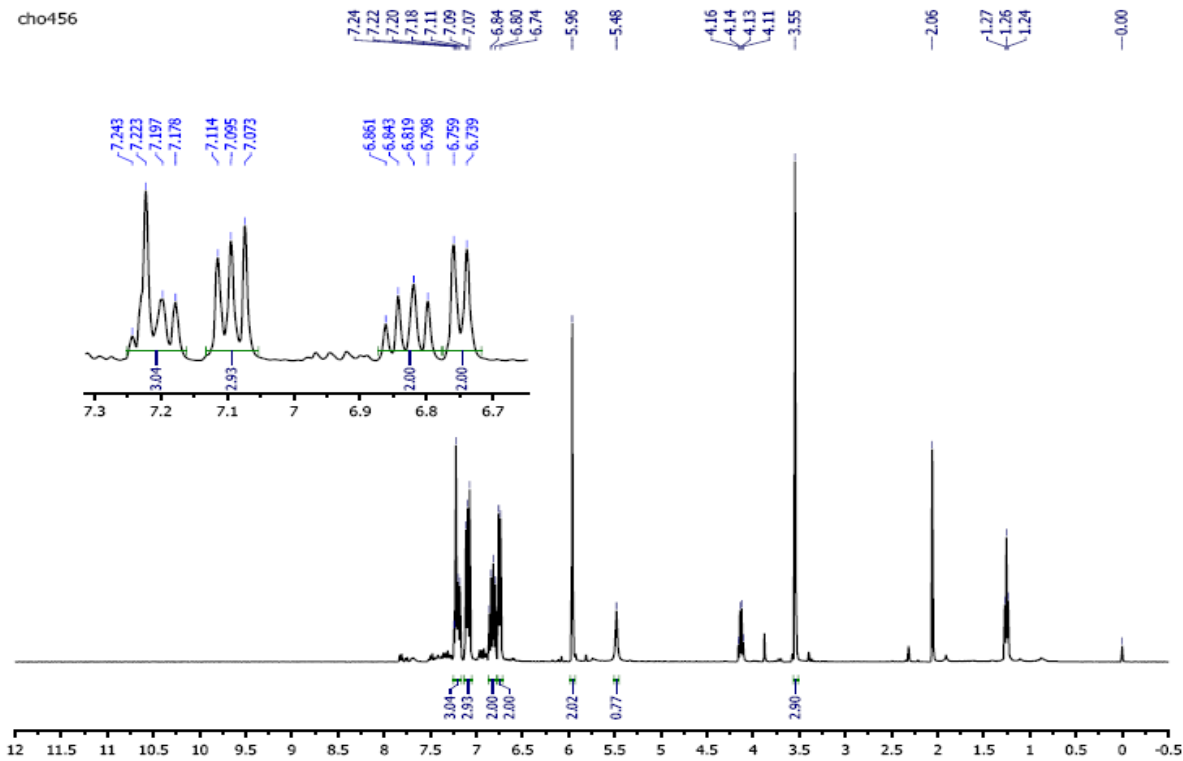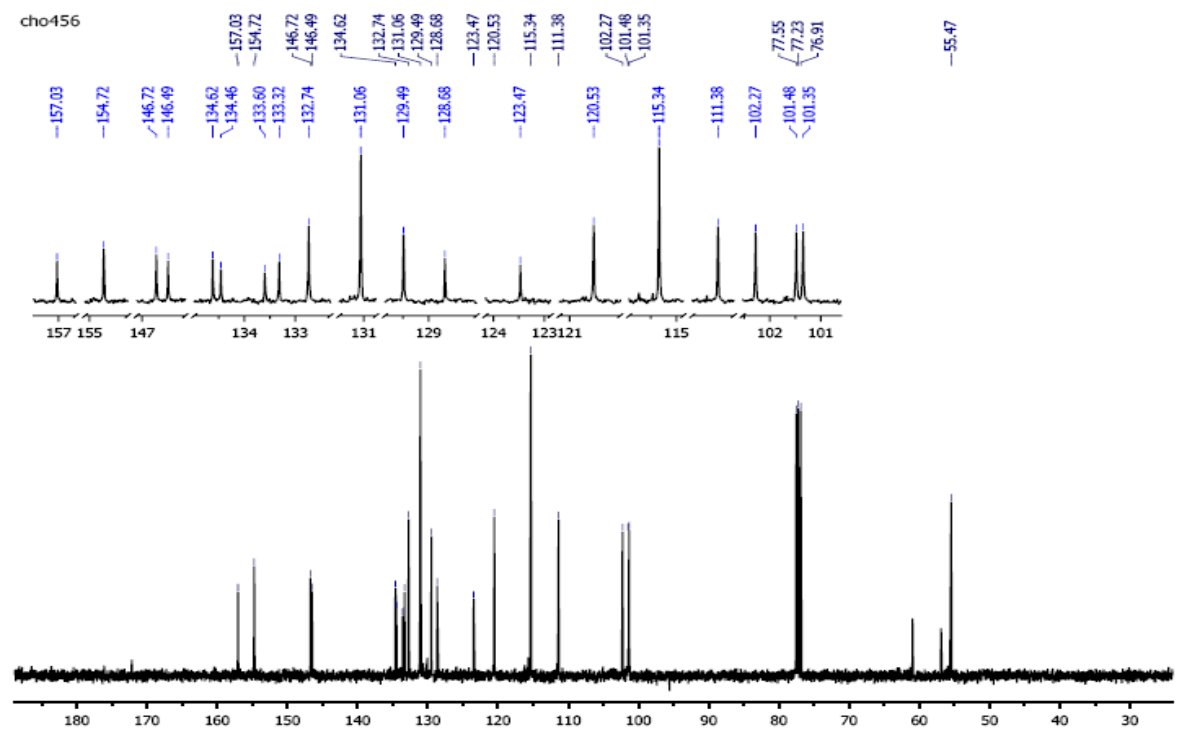

Compound 6{1}

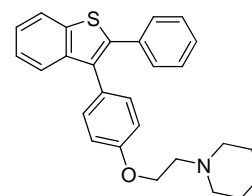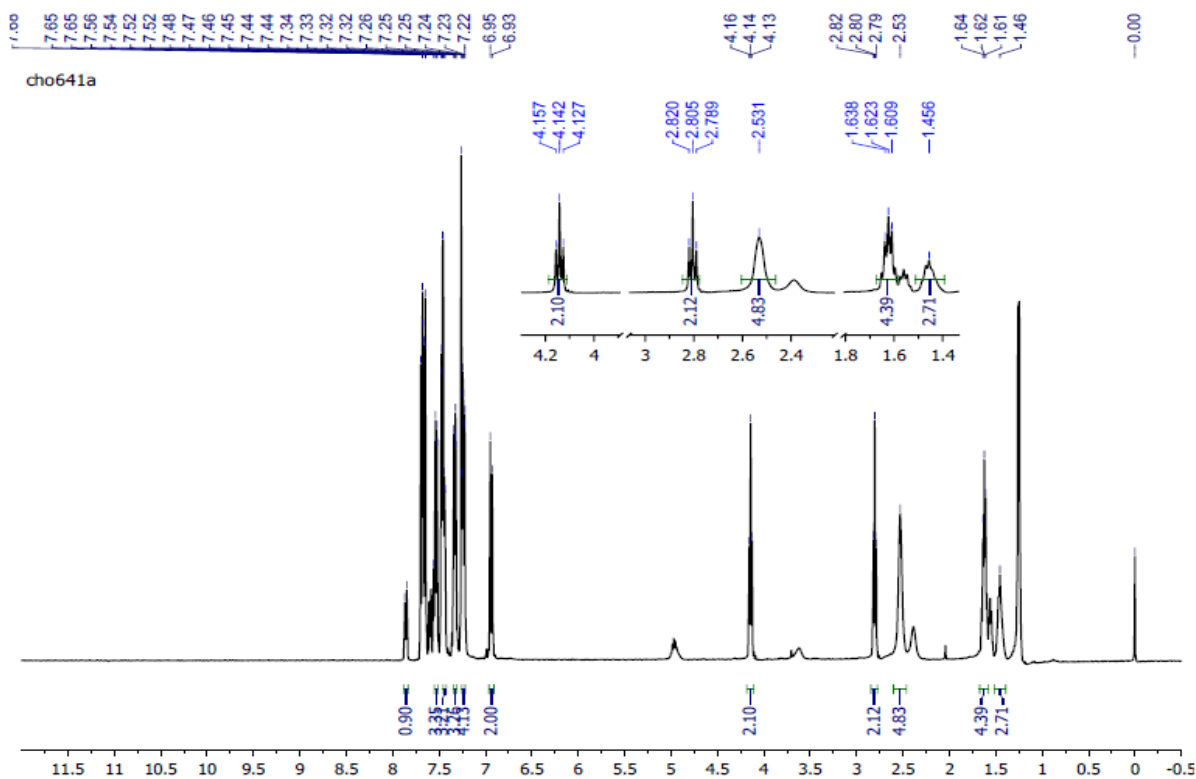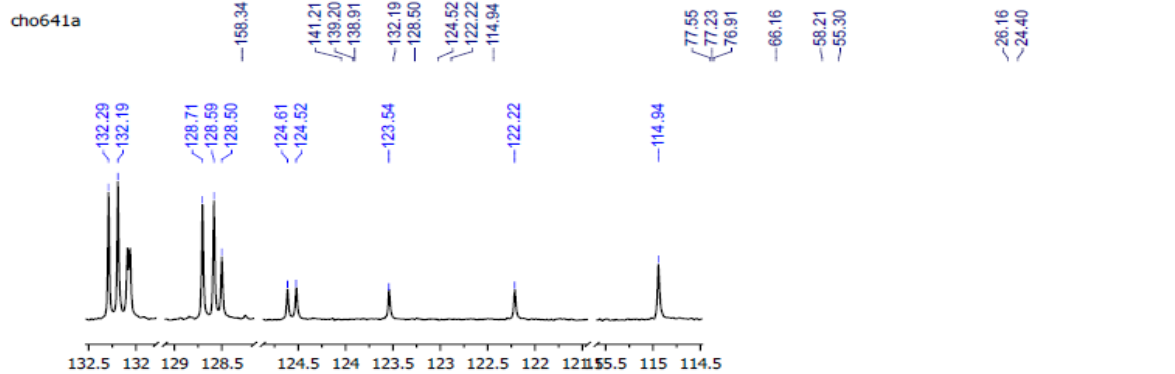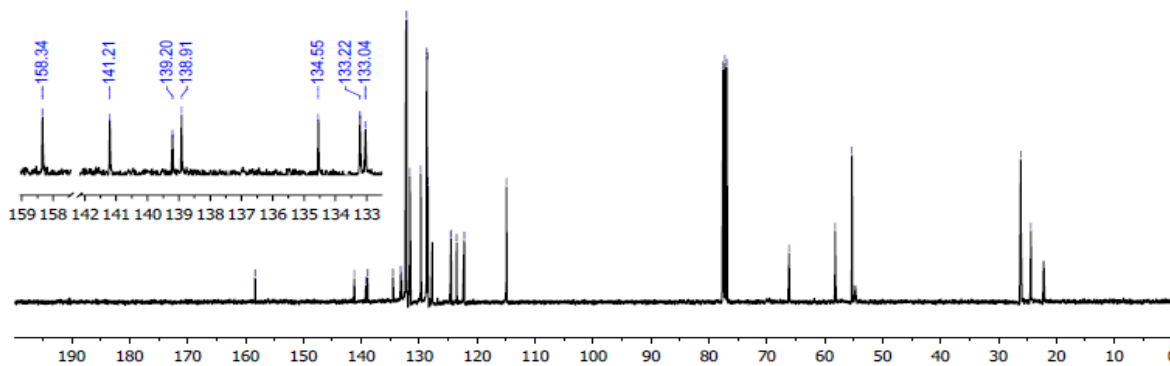



Compound 6{2}

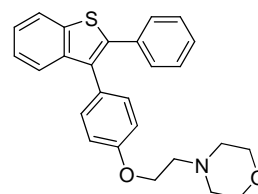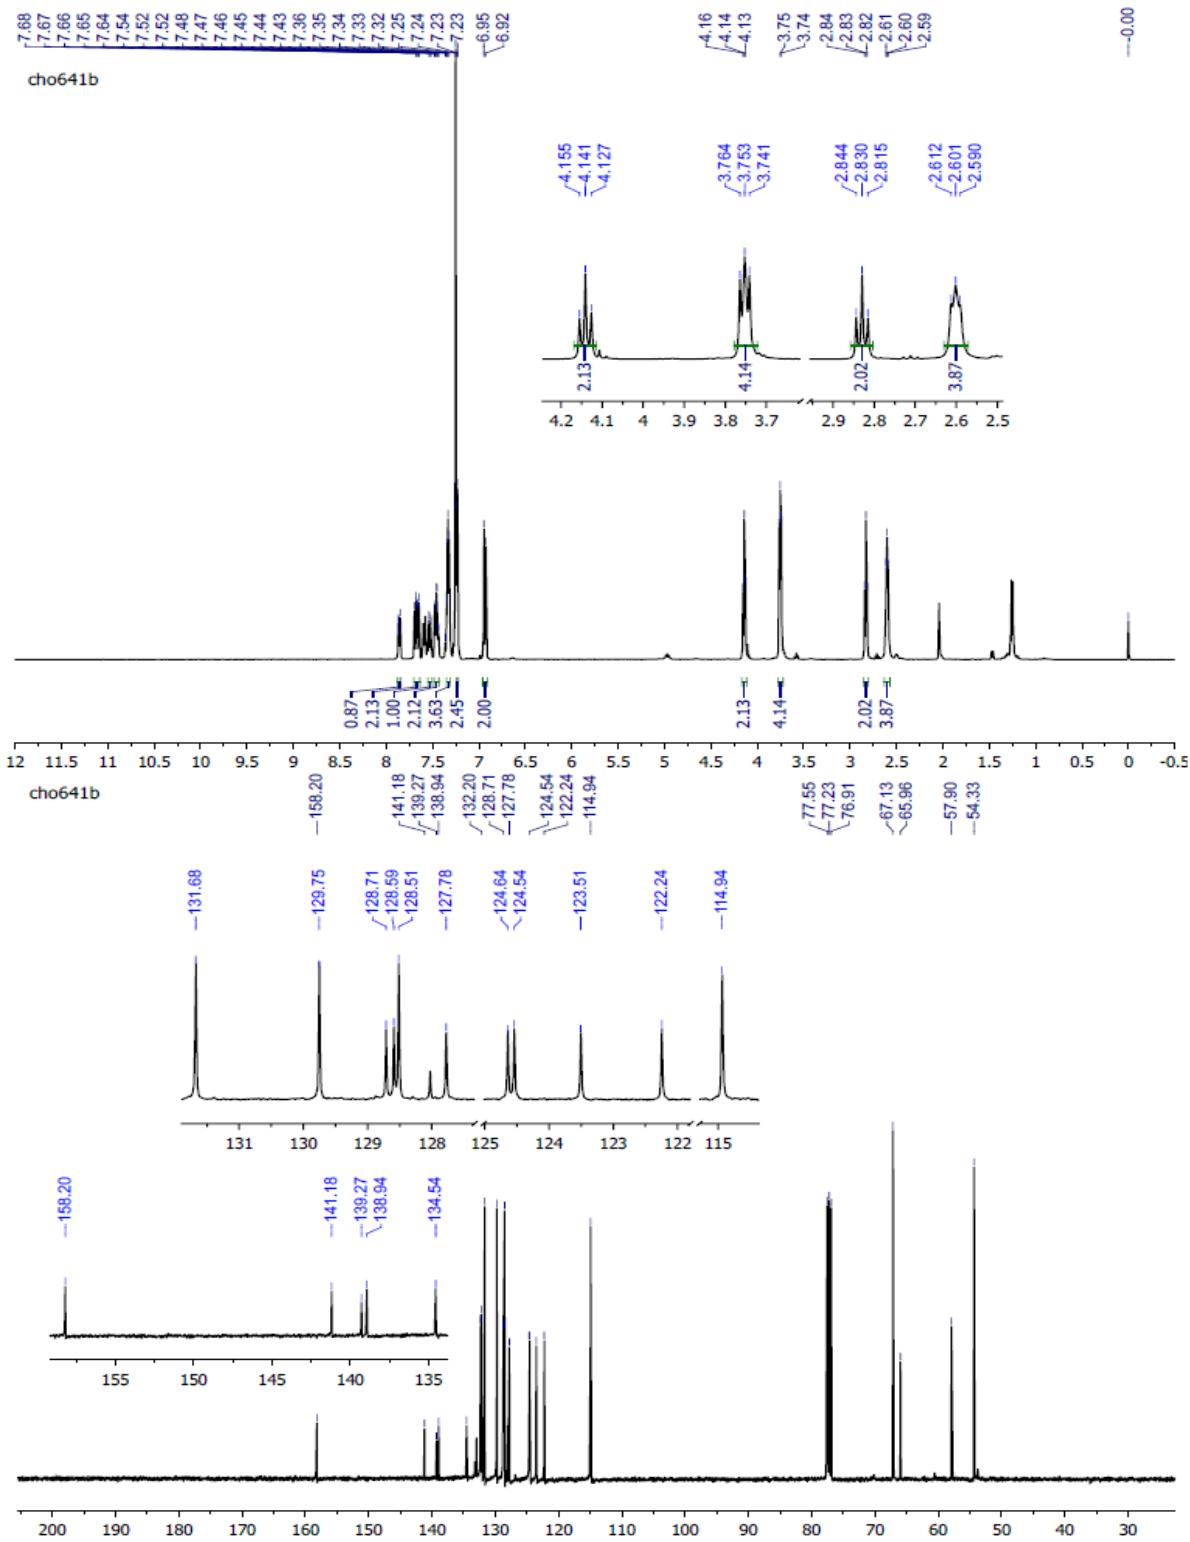

Compound 6{4}

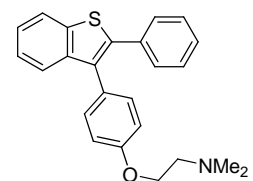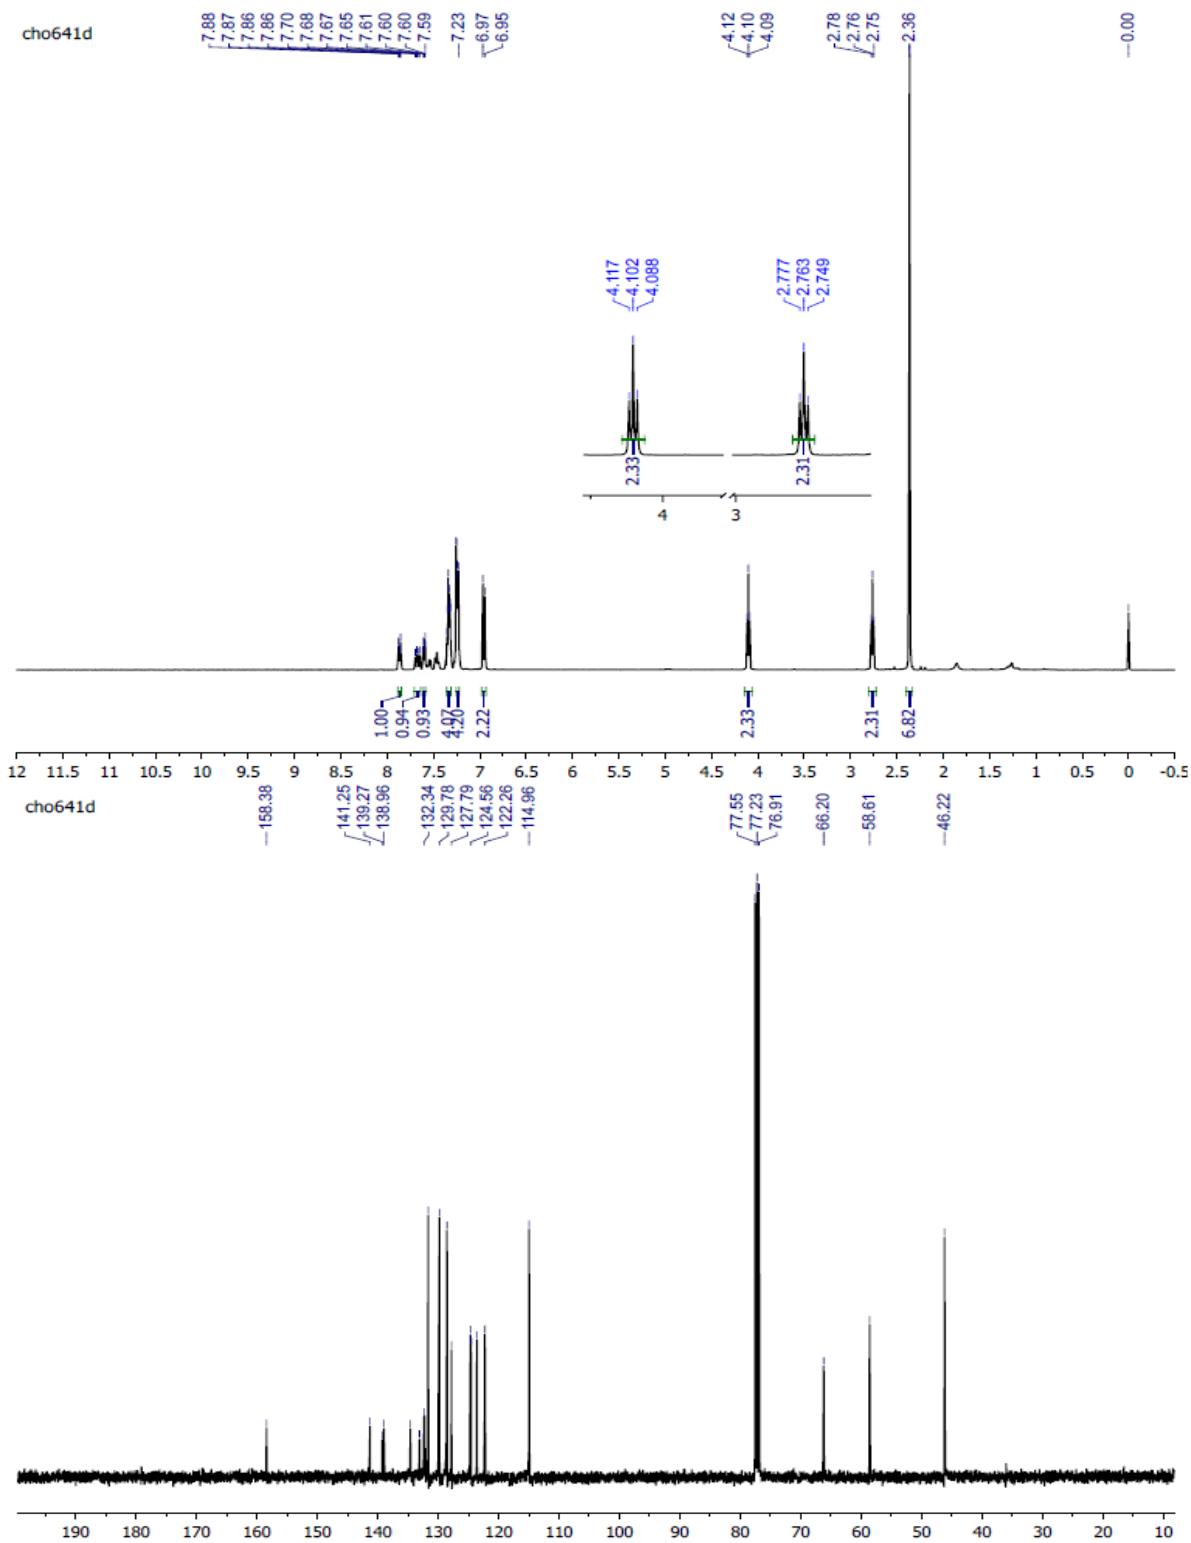

Compound 6{5}

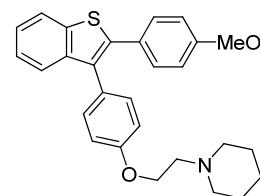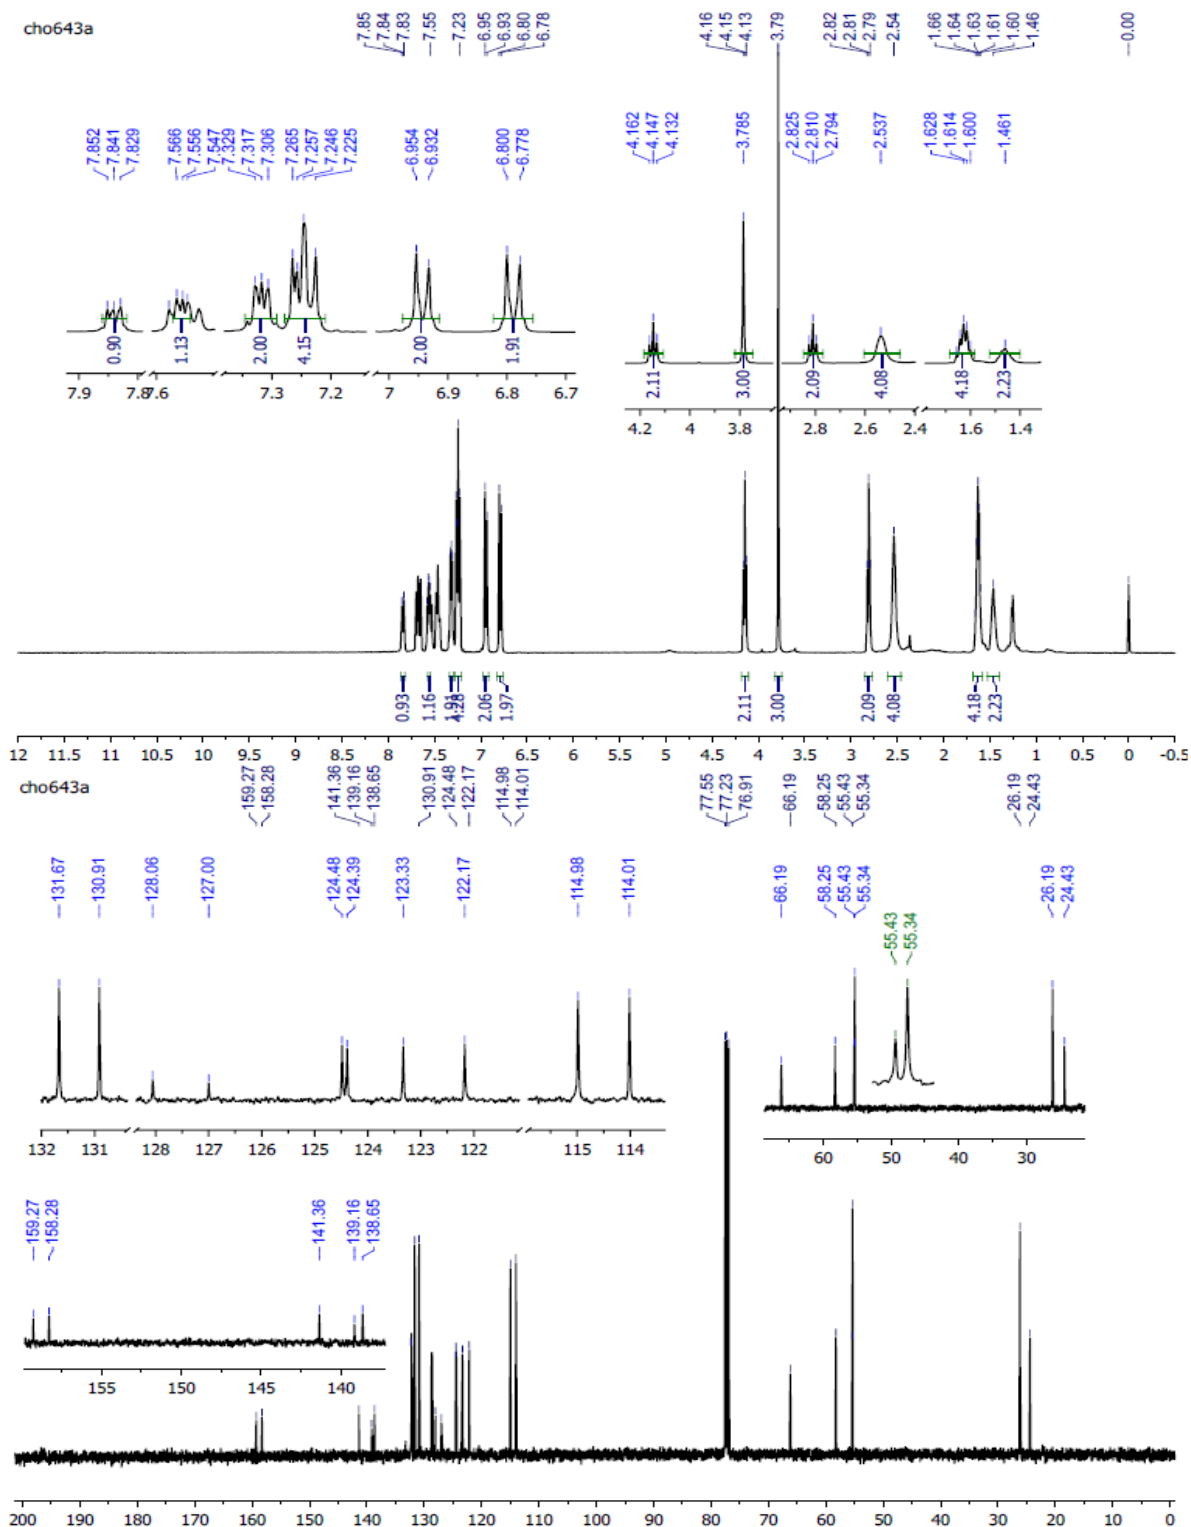

Compound 6{6}

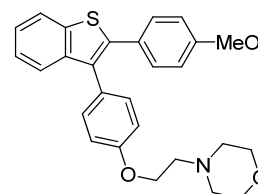

cho643b

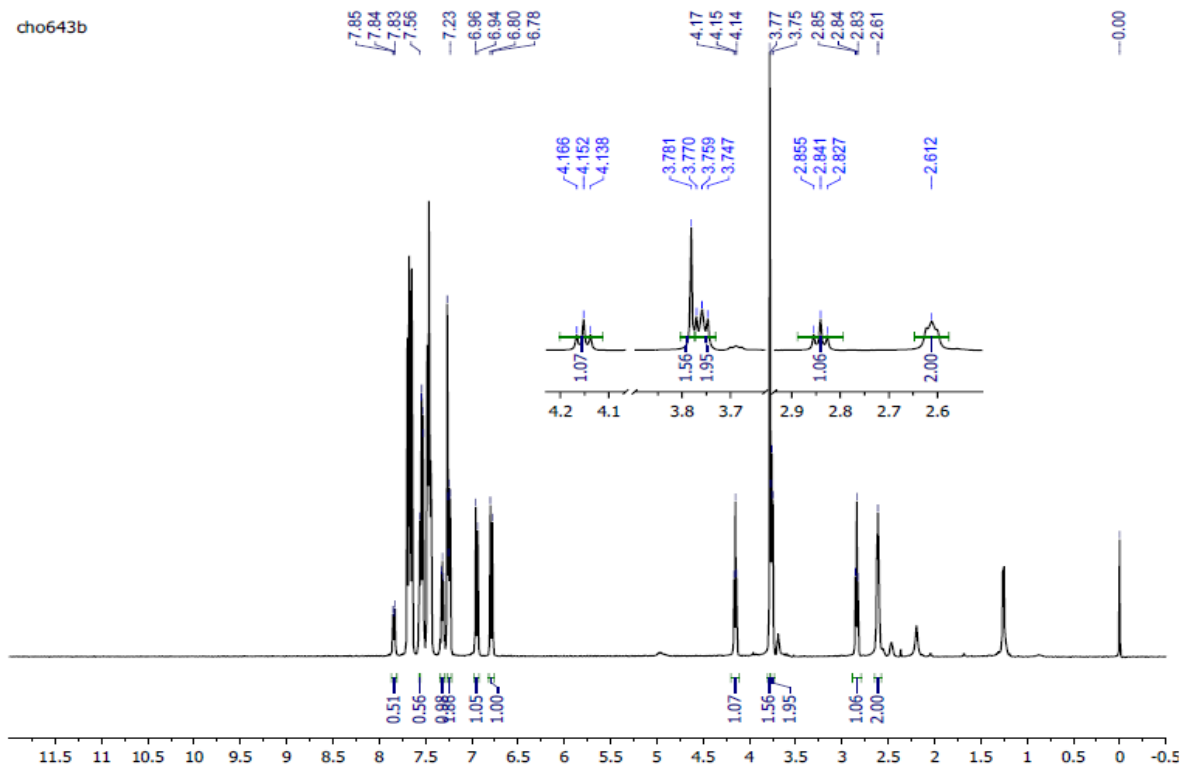

cho643b

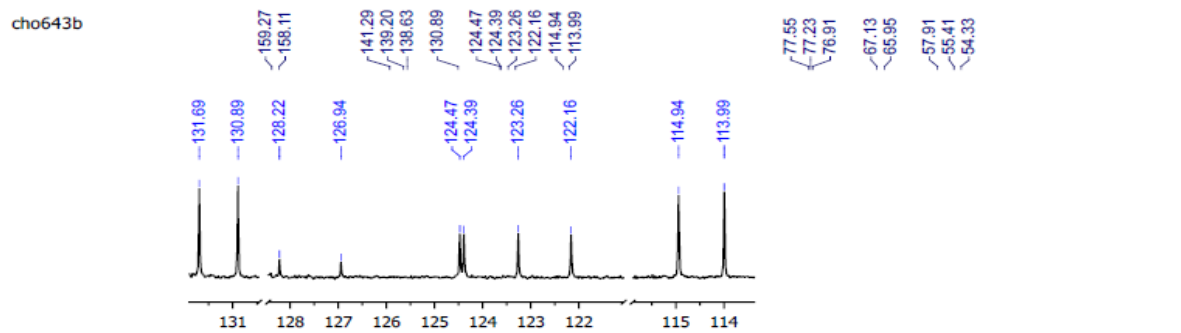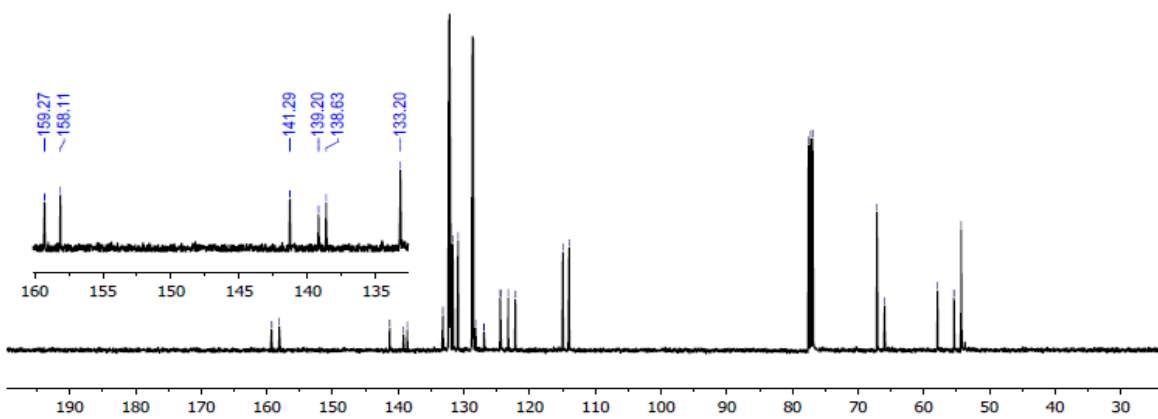

Compound 6{7}

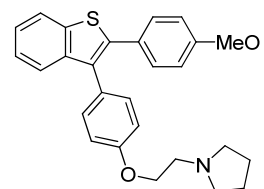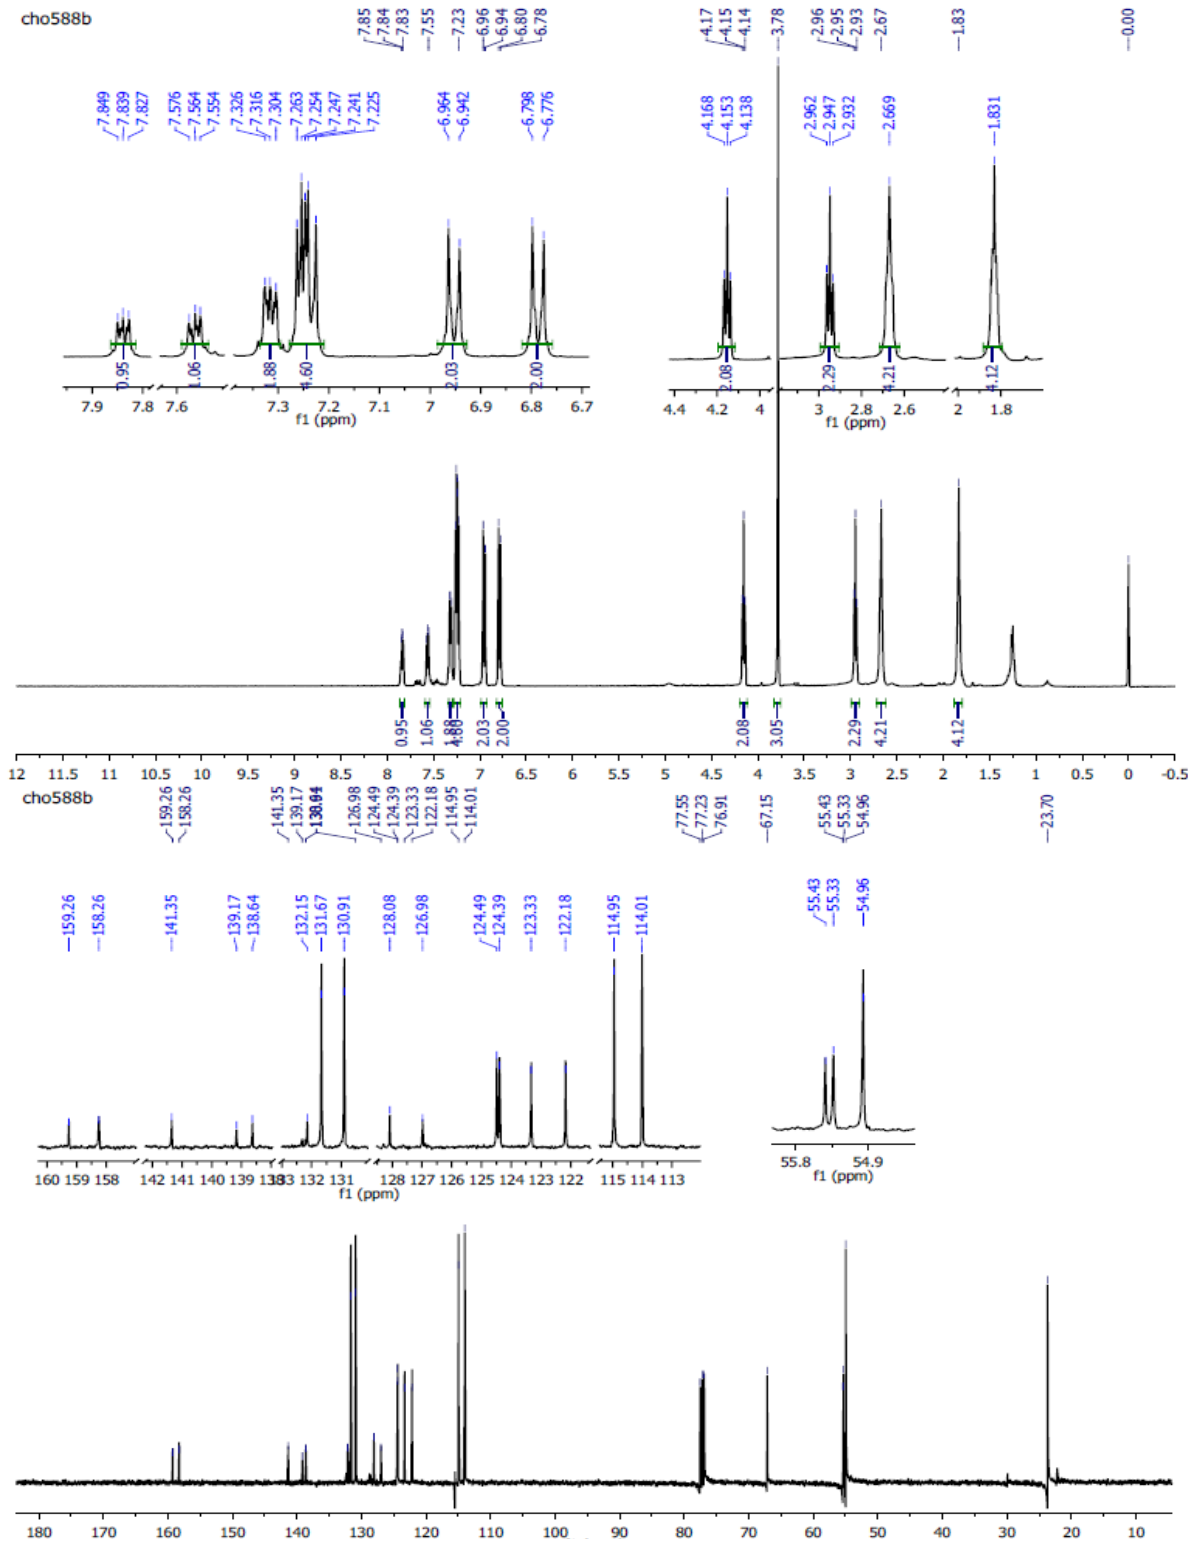

Compound 6{8}

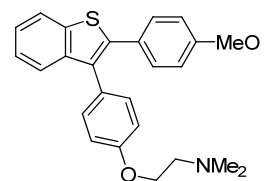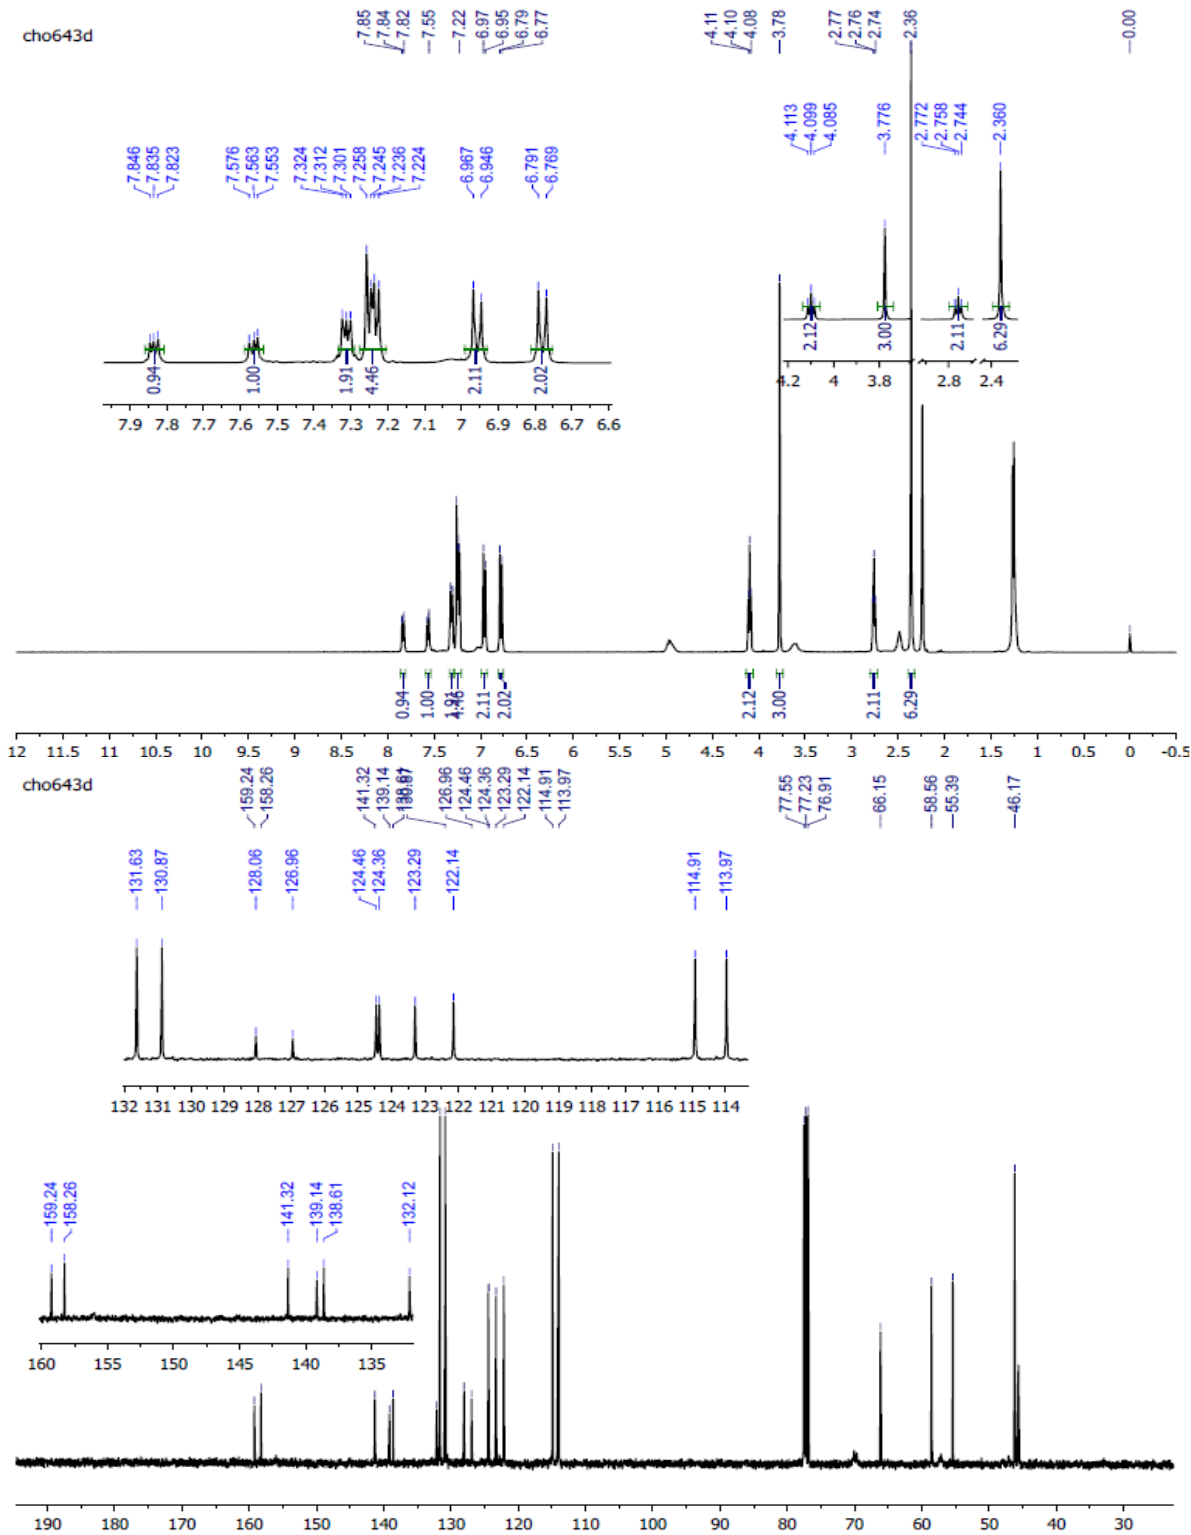

Compound 6{9}

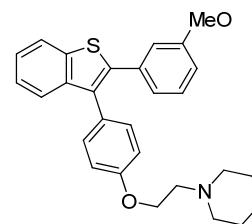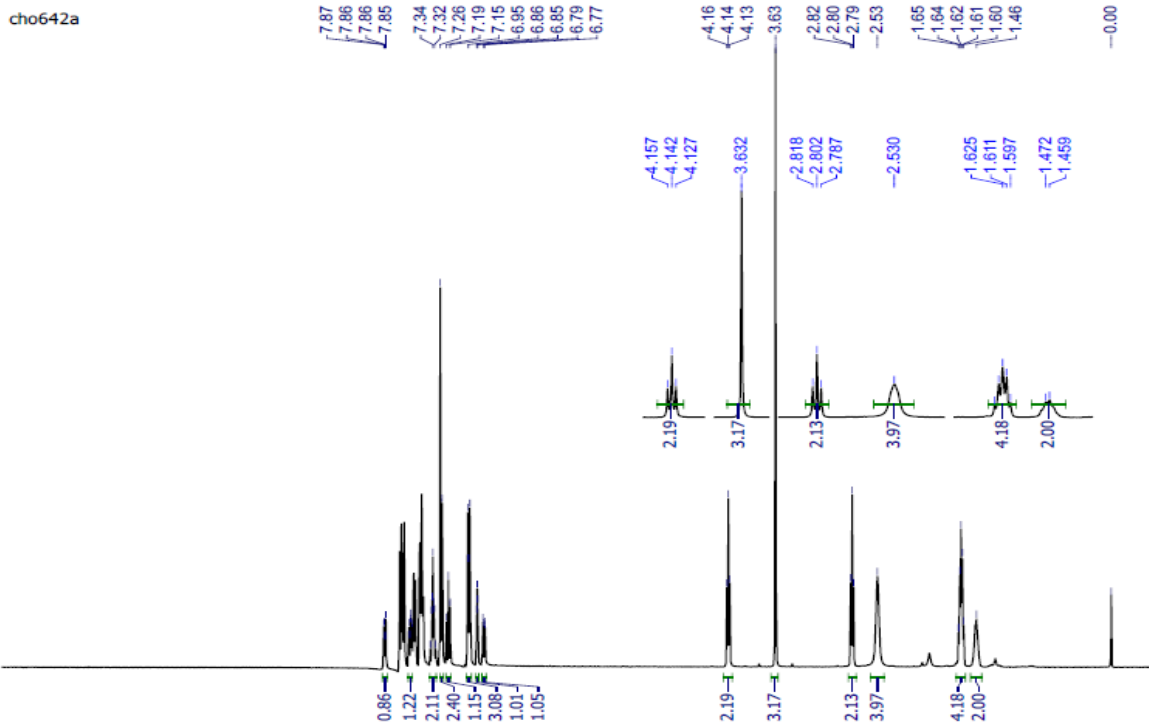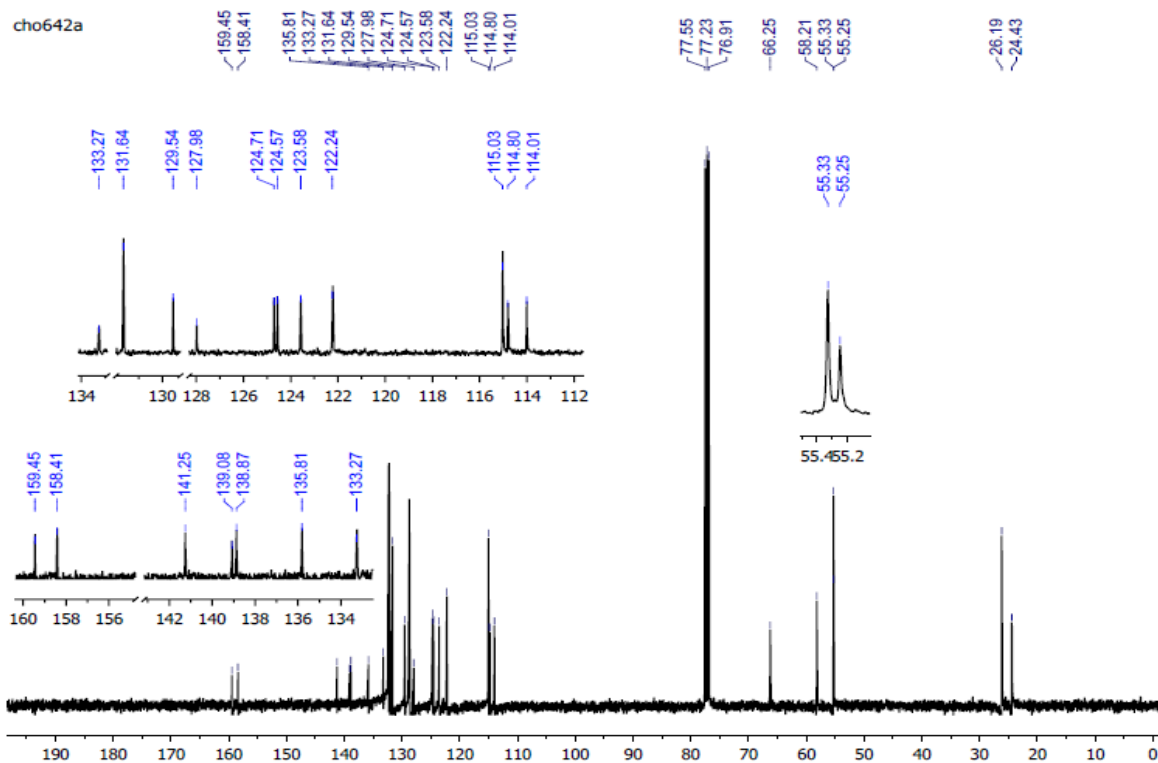

Compound 6{10}

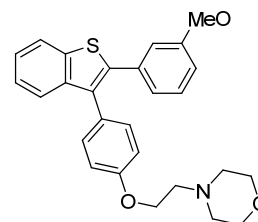

cho642b

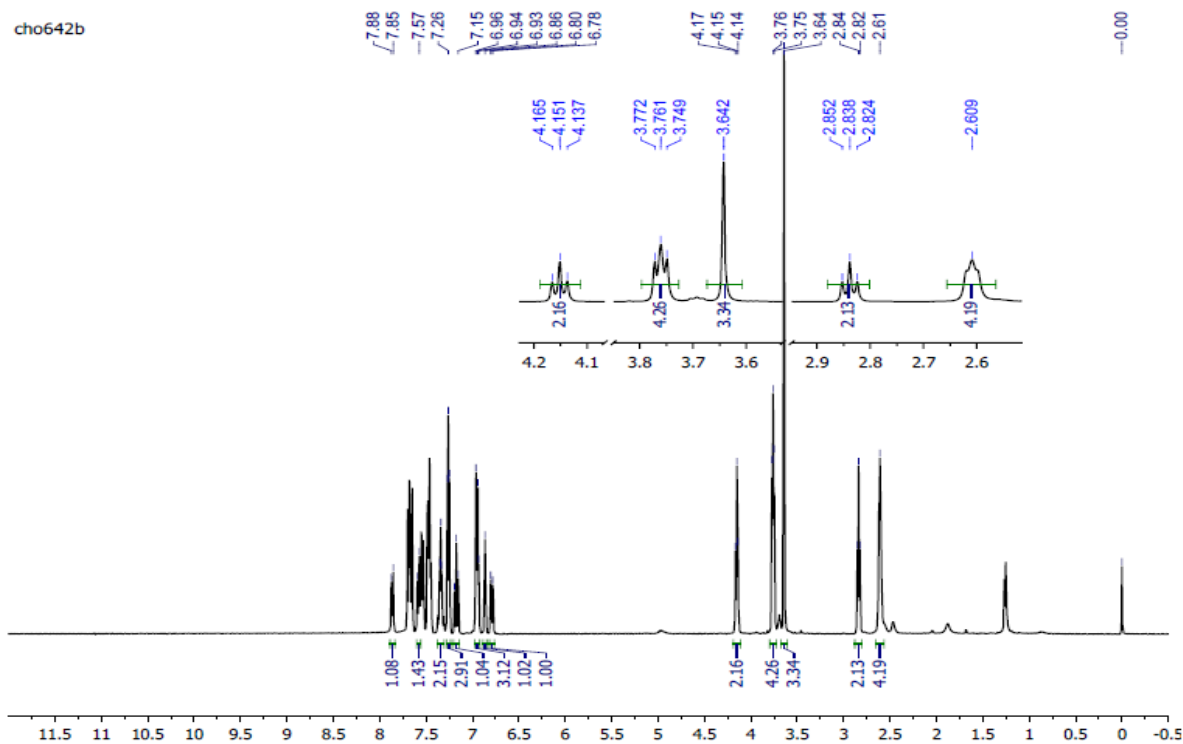

cho642b

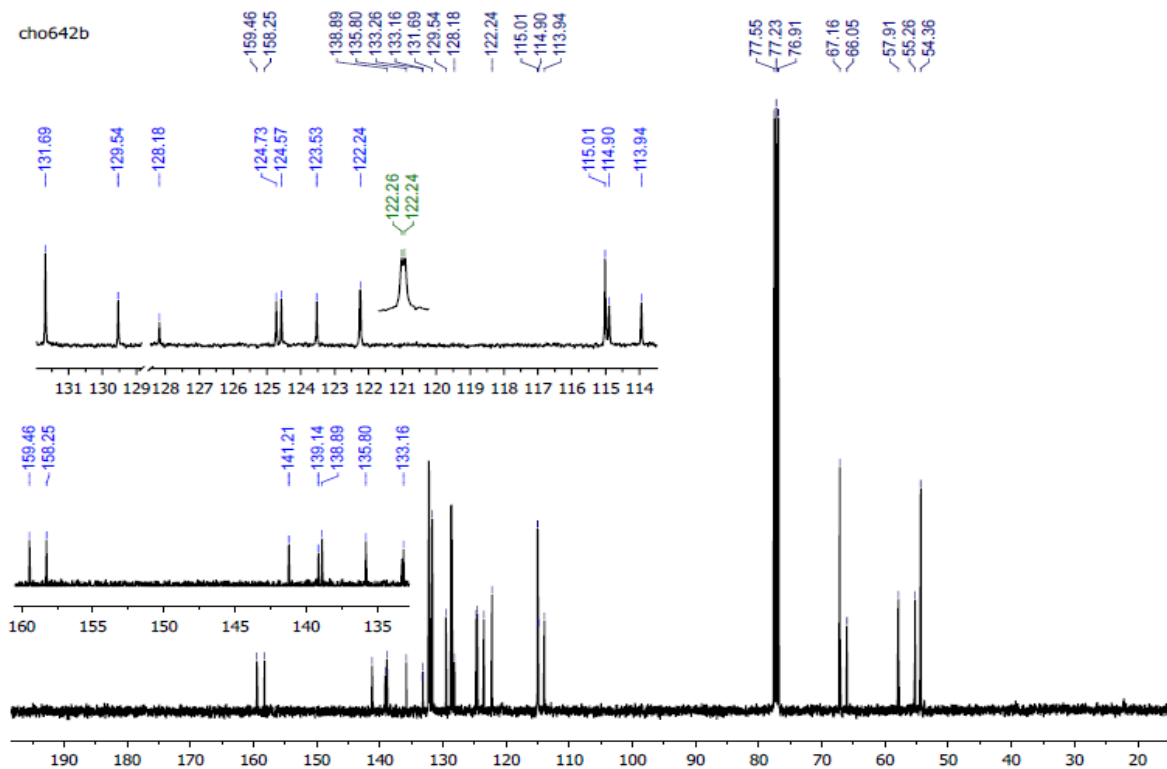



Compound 6{11}

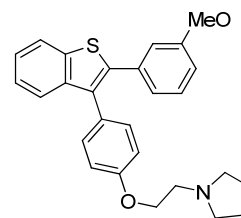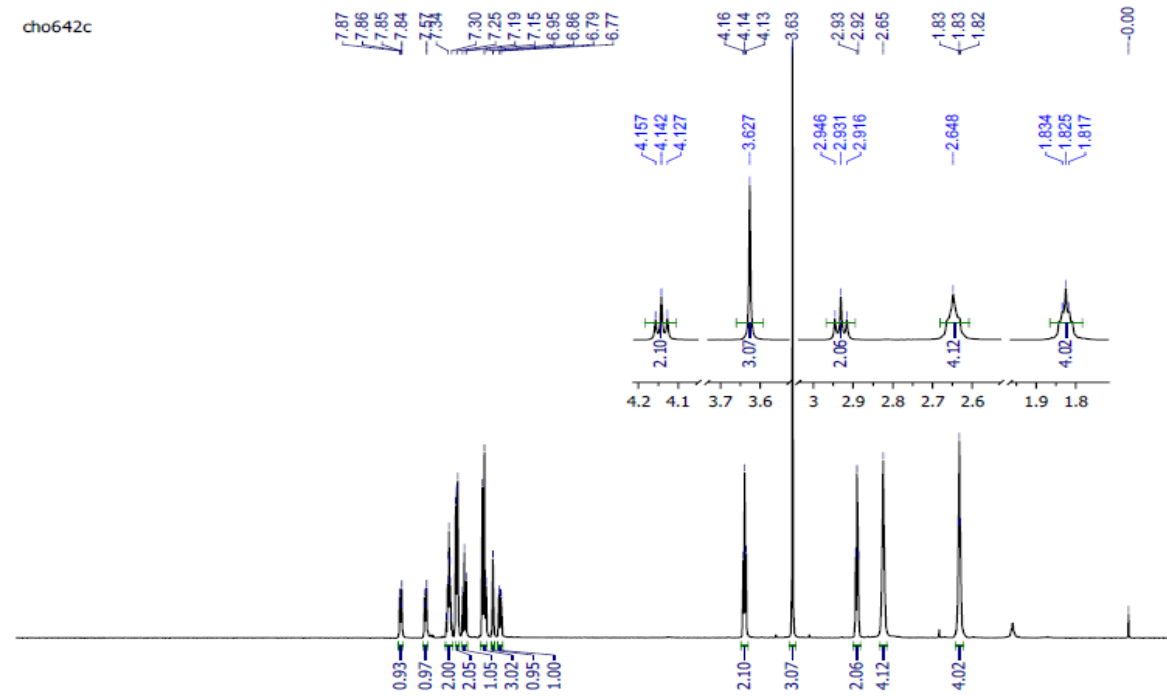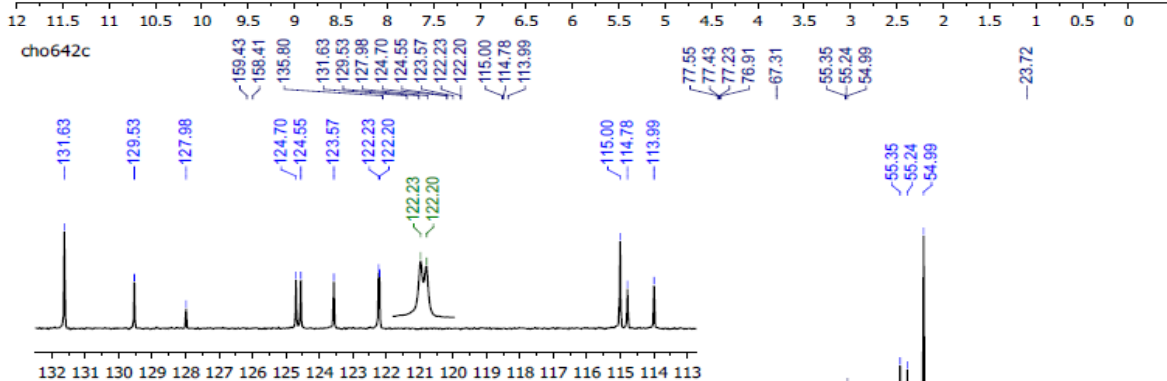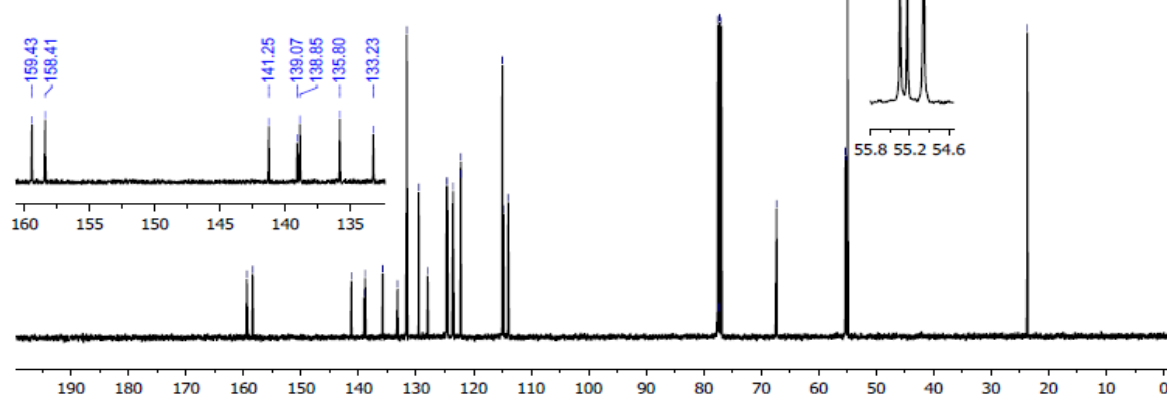

Compound 6{12}

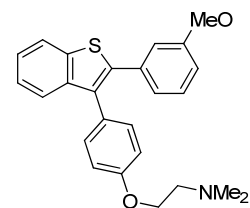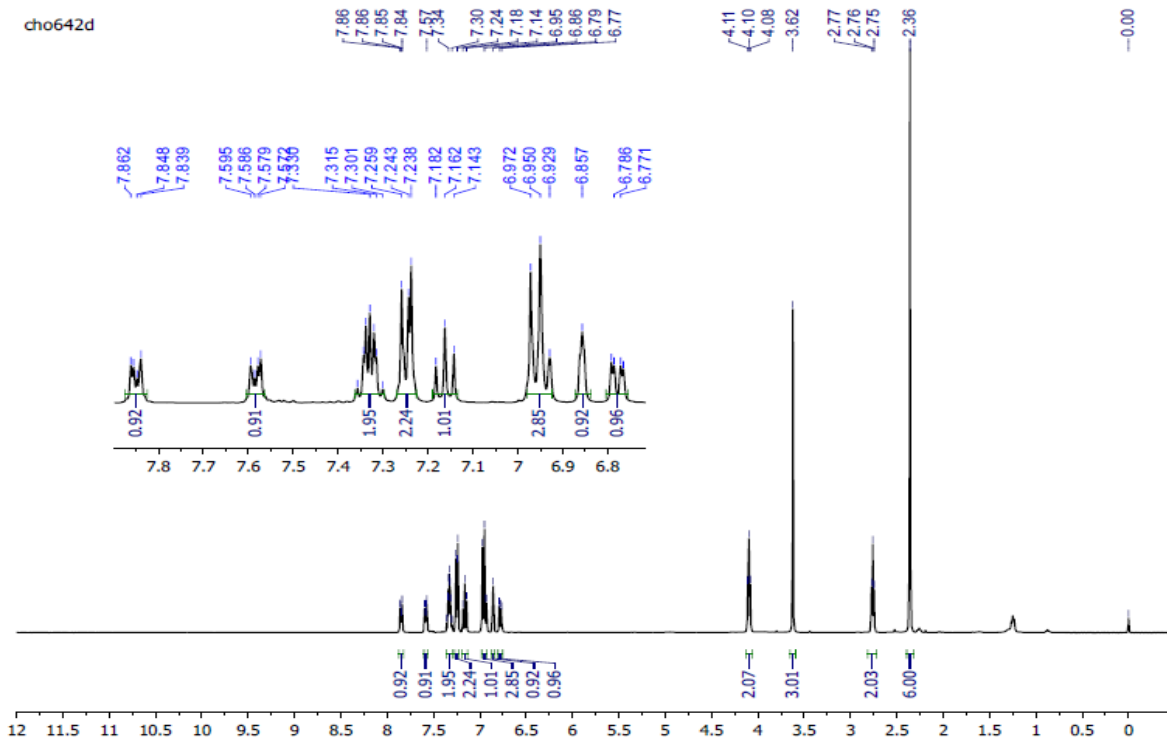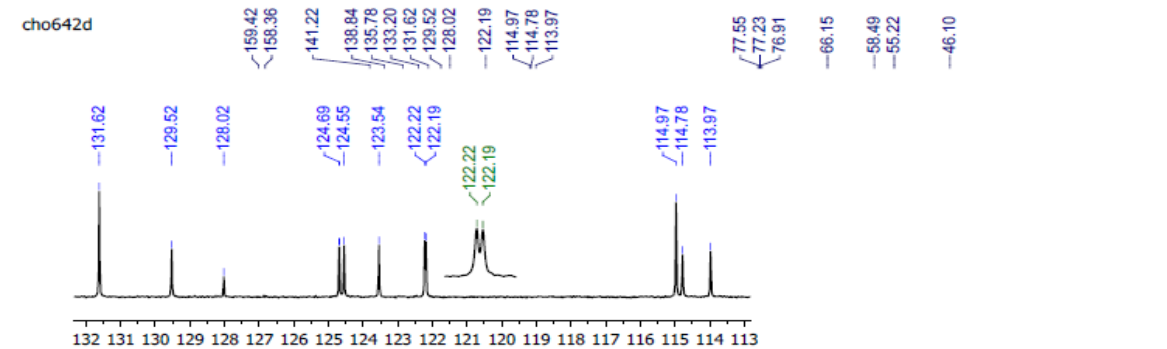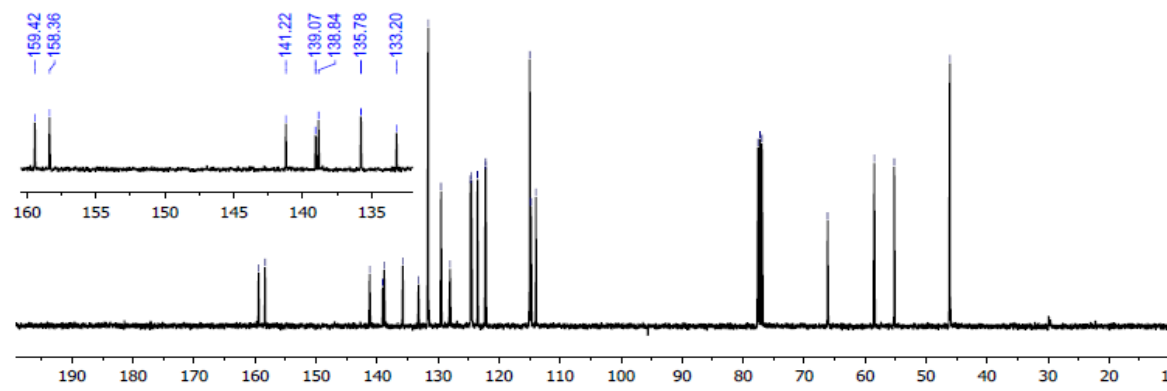

Compound 6{13}

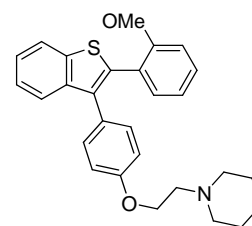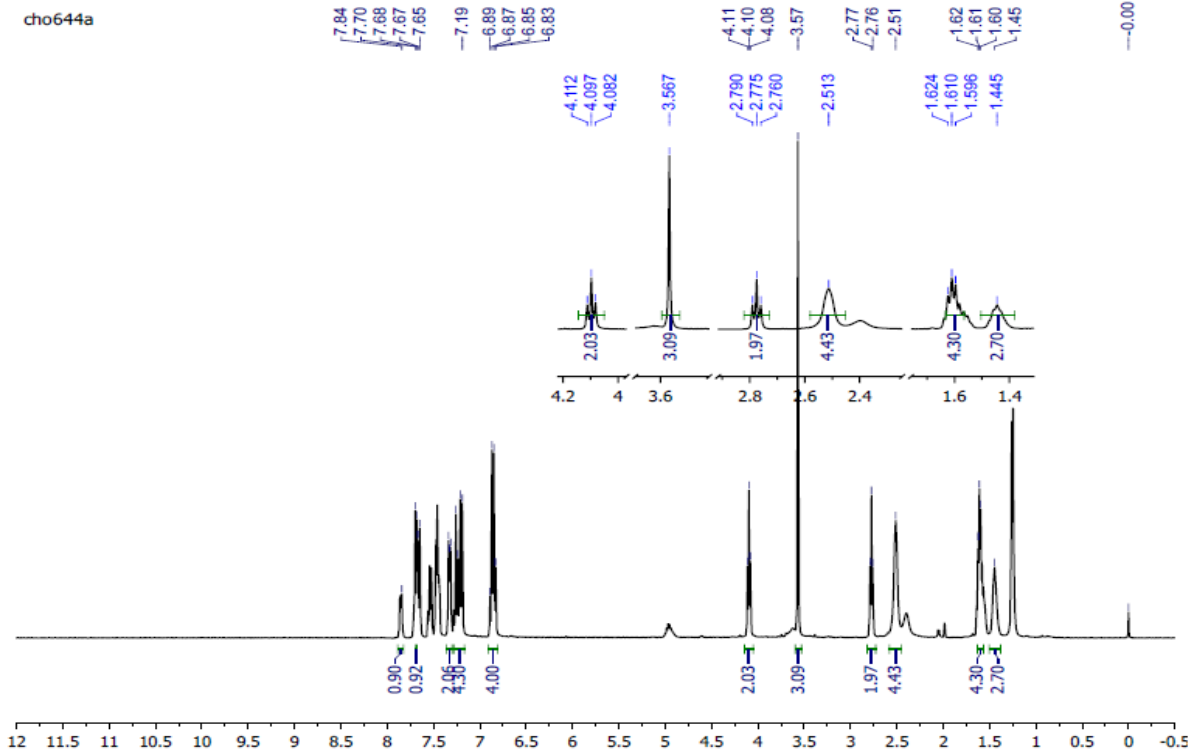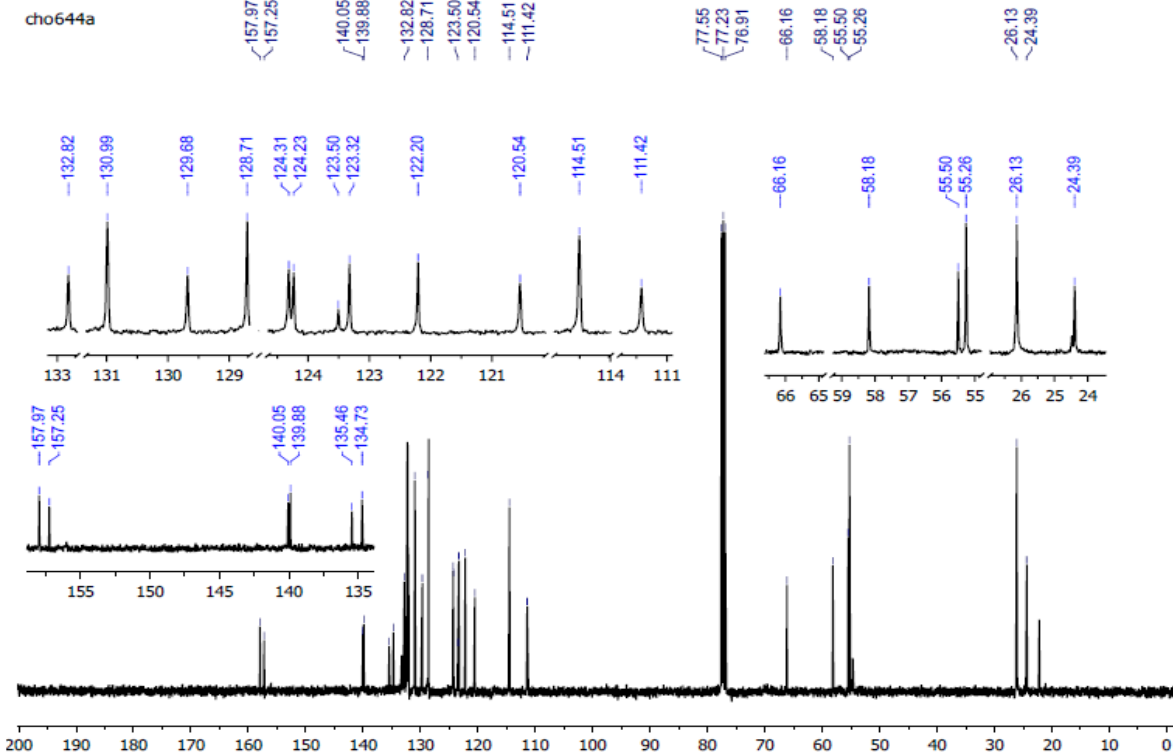

Compound 6{15}

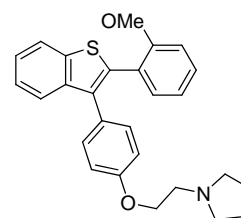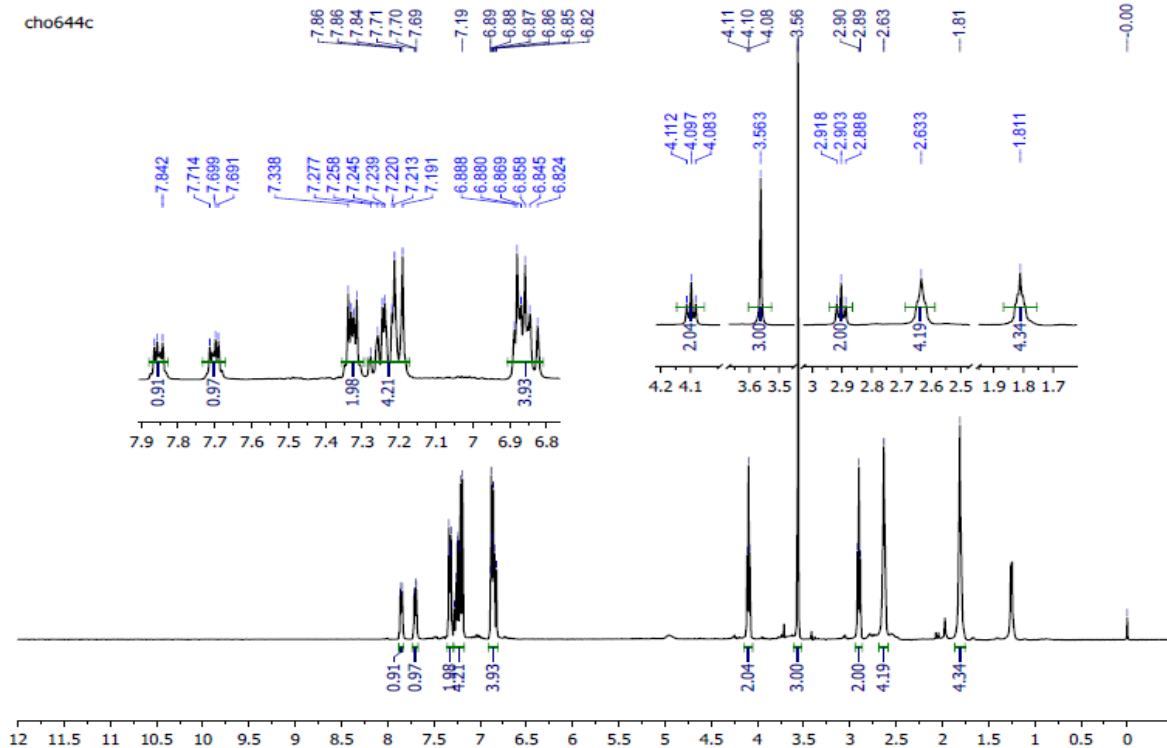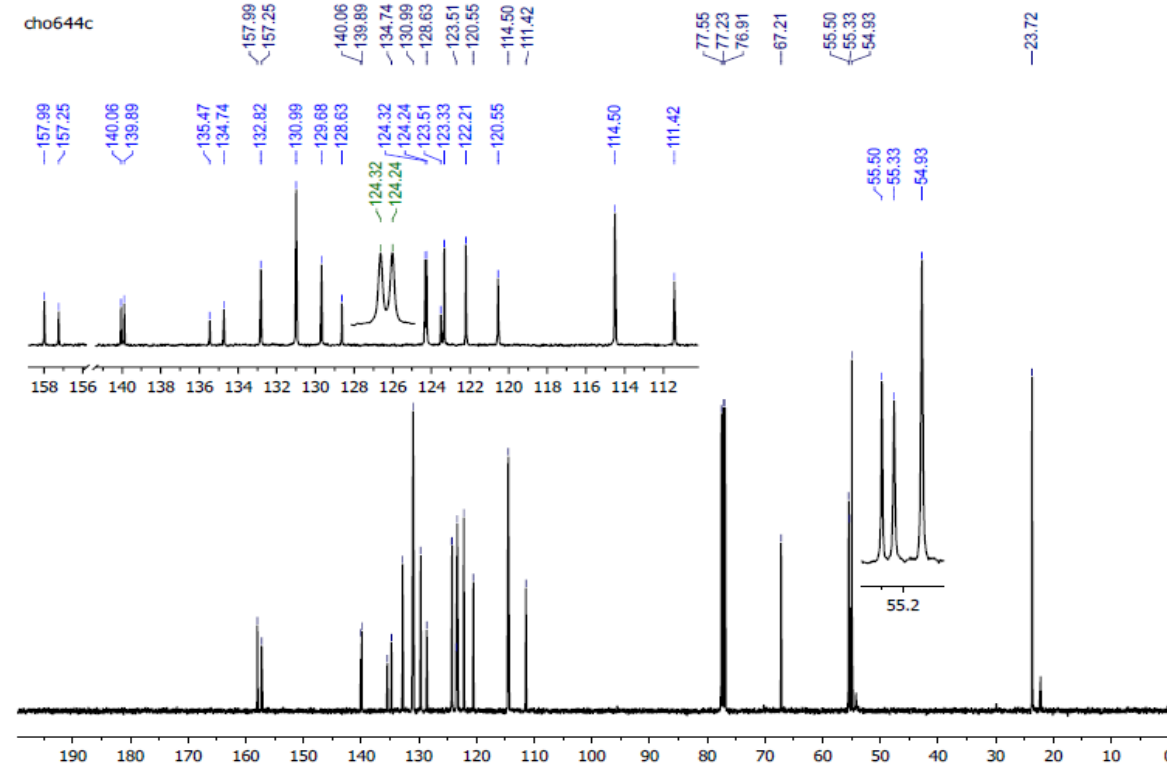

Compound 6{16}

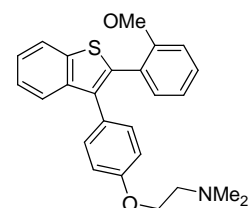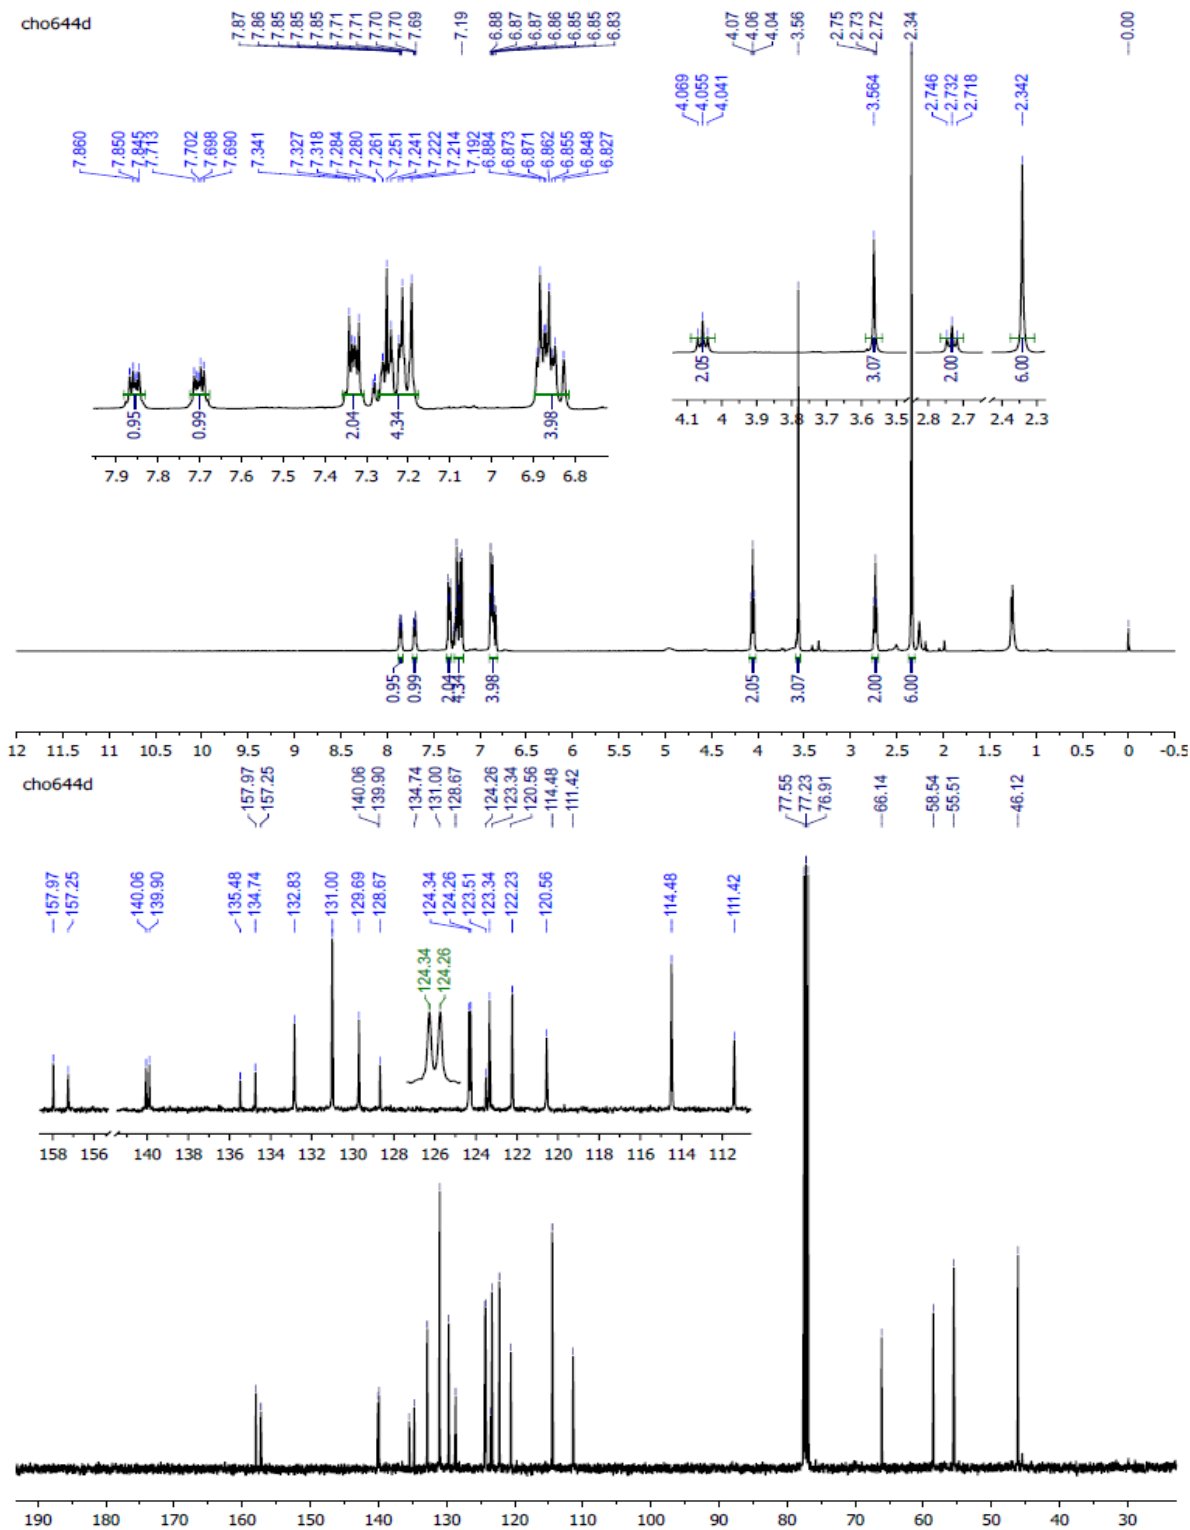

Compound 6{17}

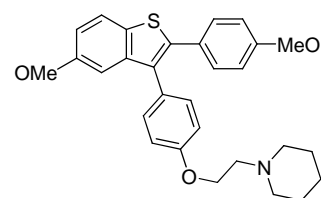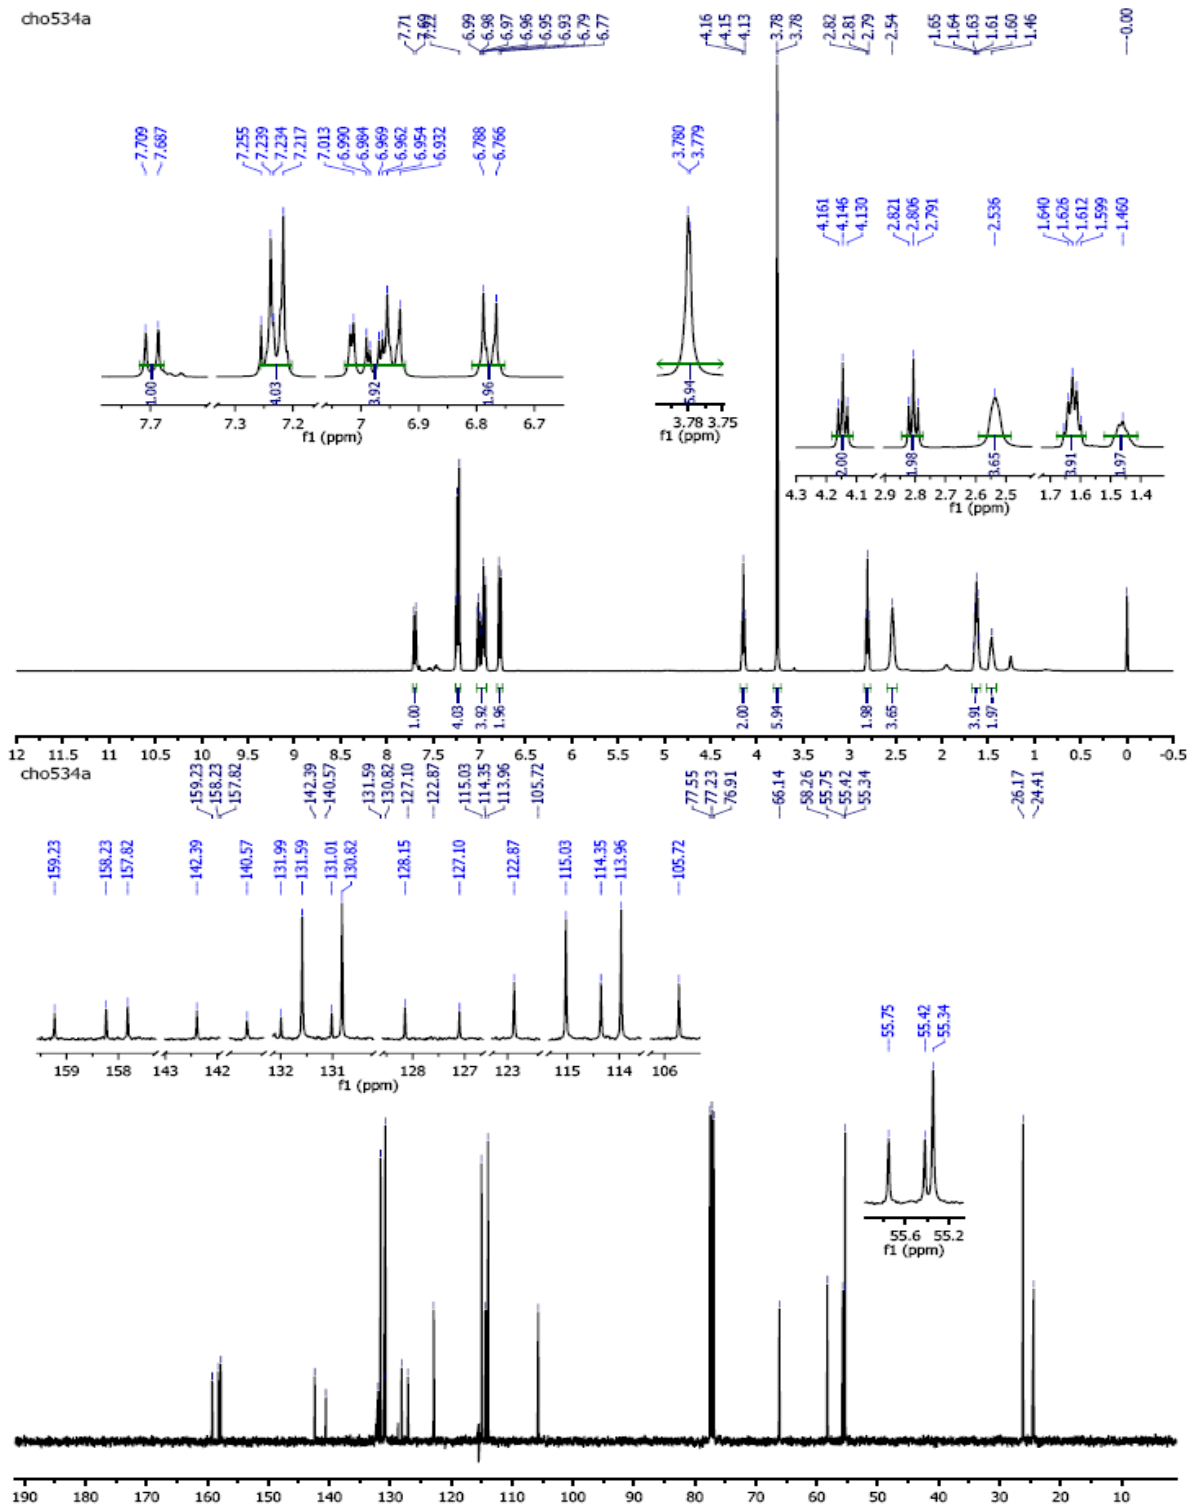

Compound 6{19}

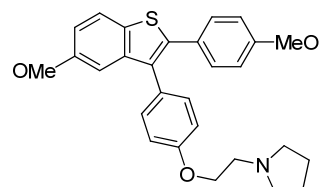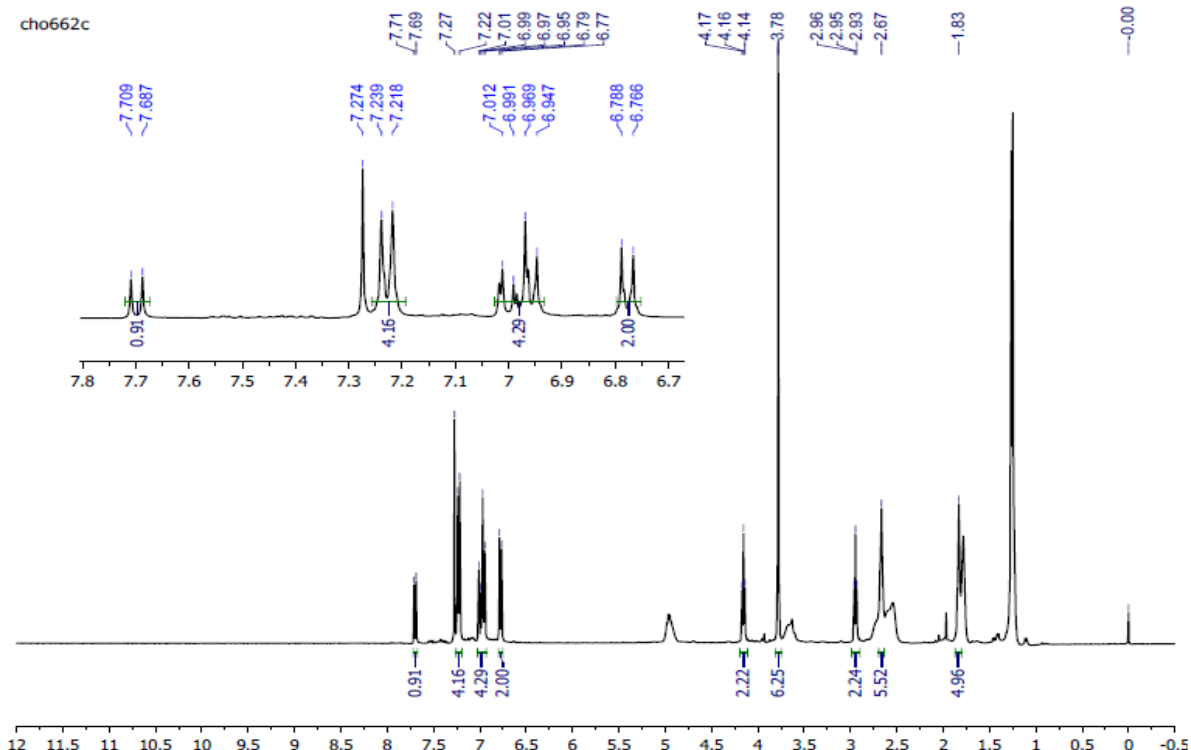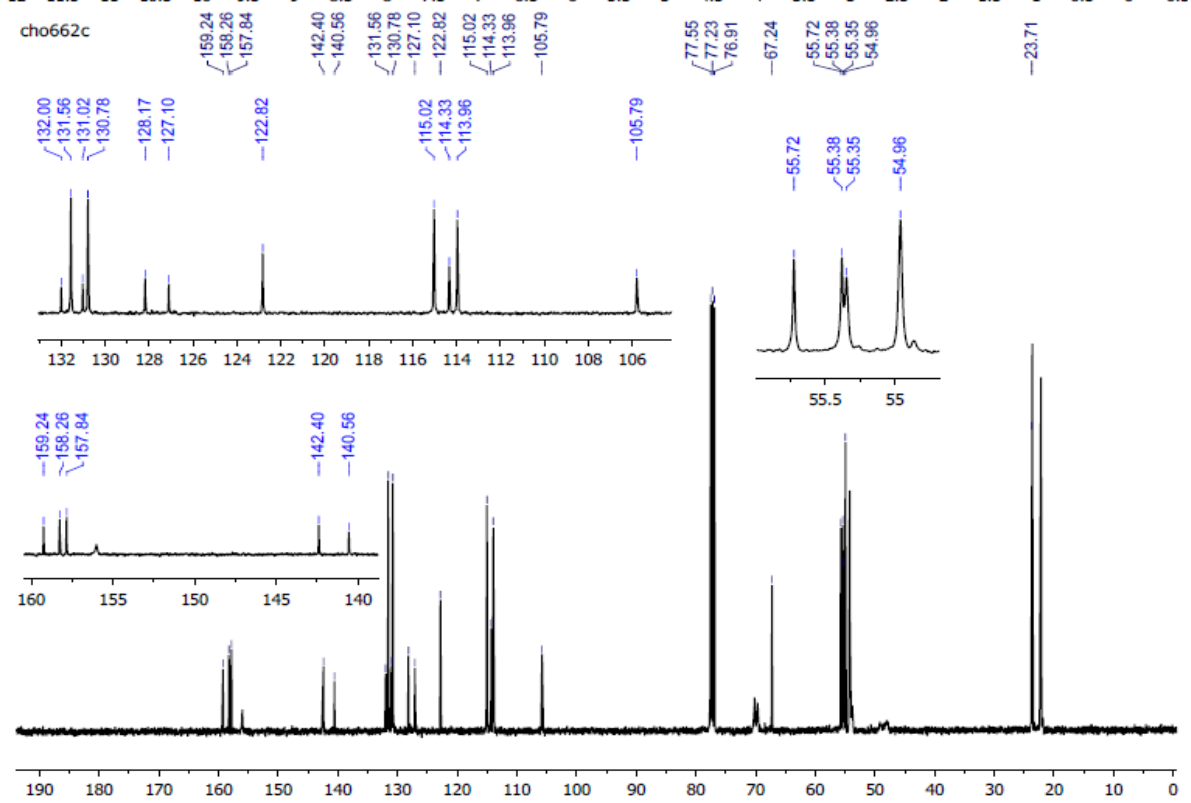

Compound 6{20}

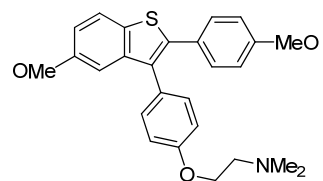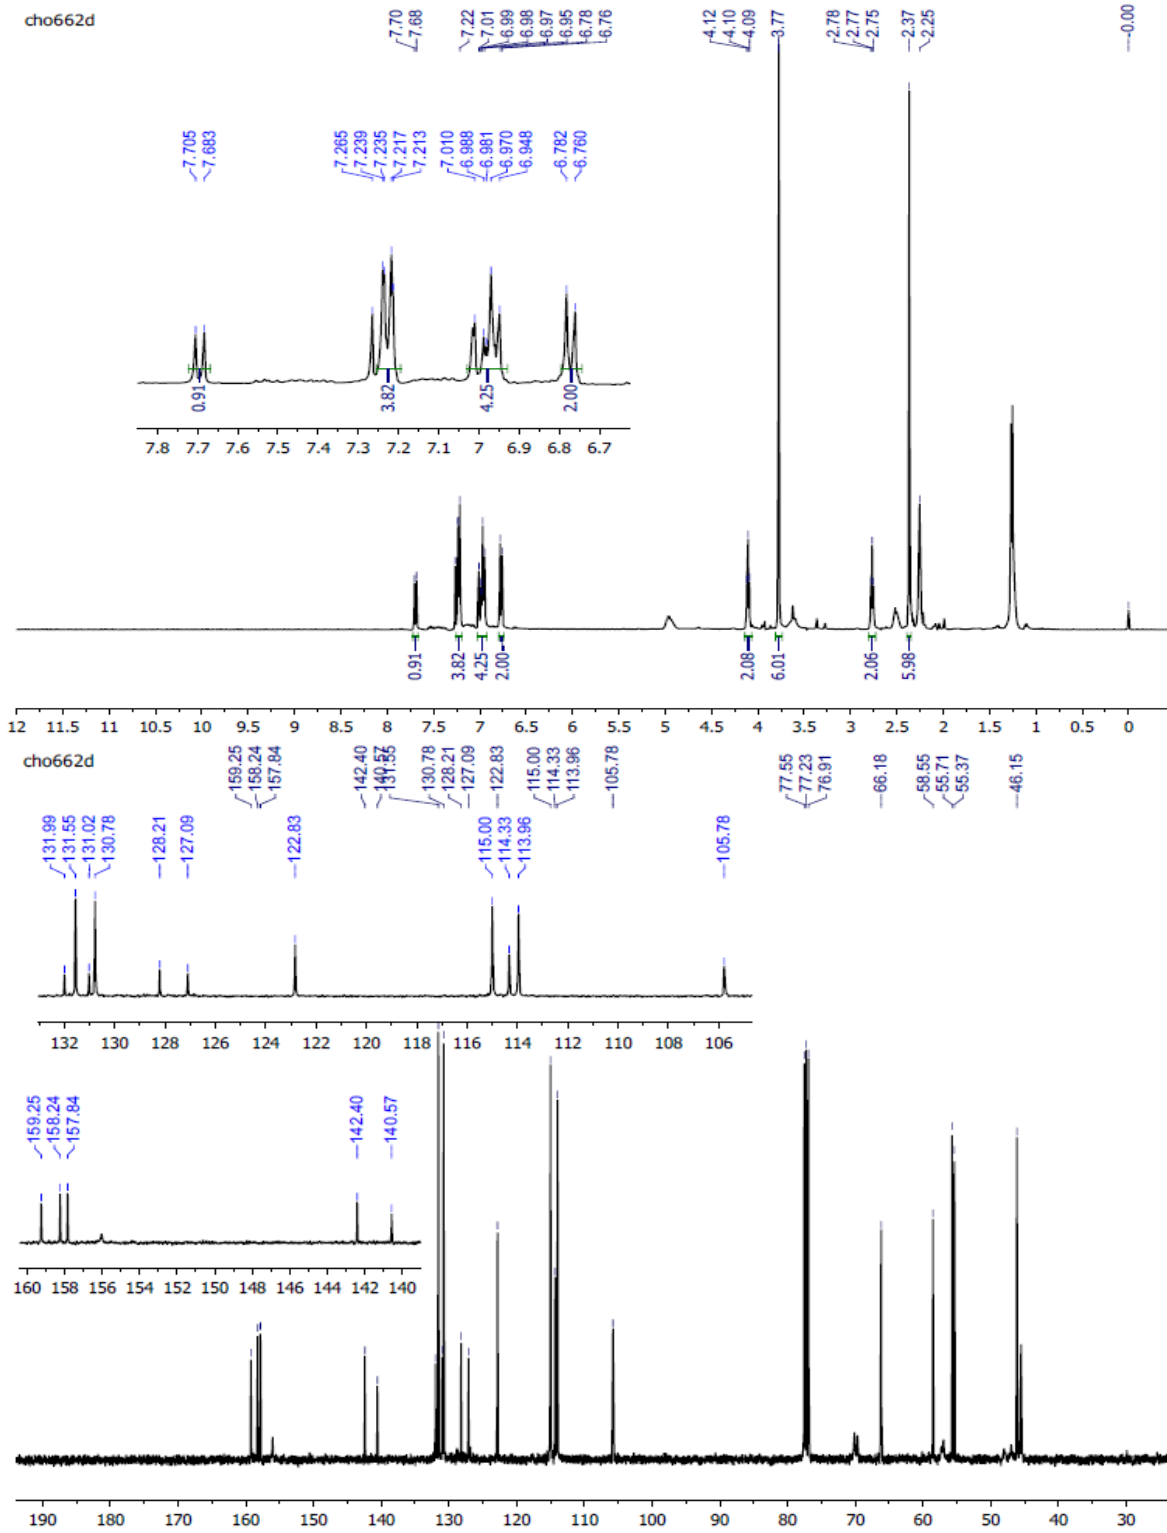



Compound 6{21}

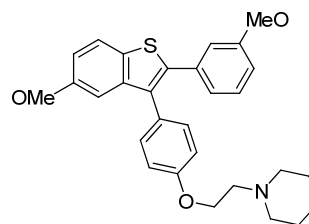

cho519-c

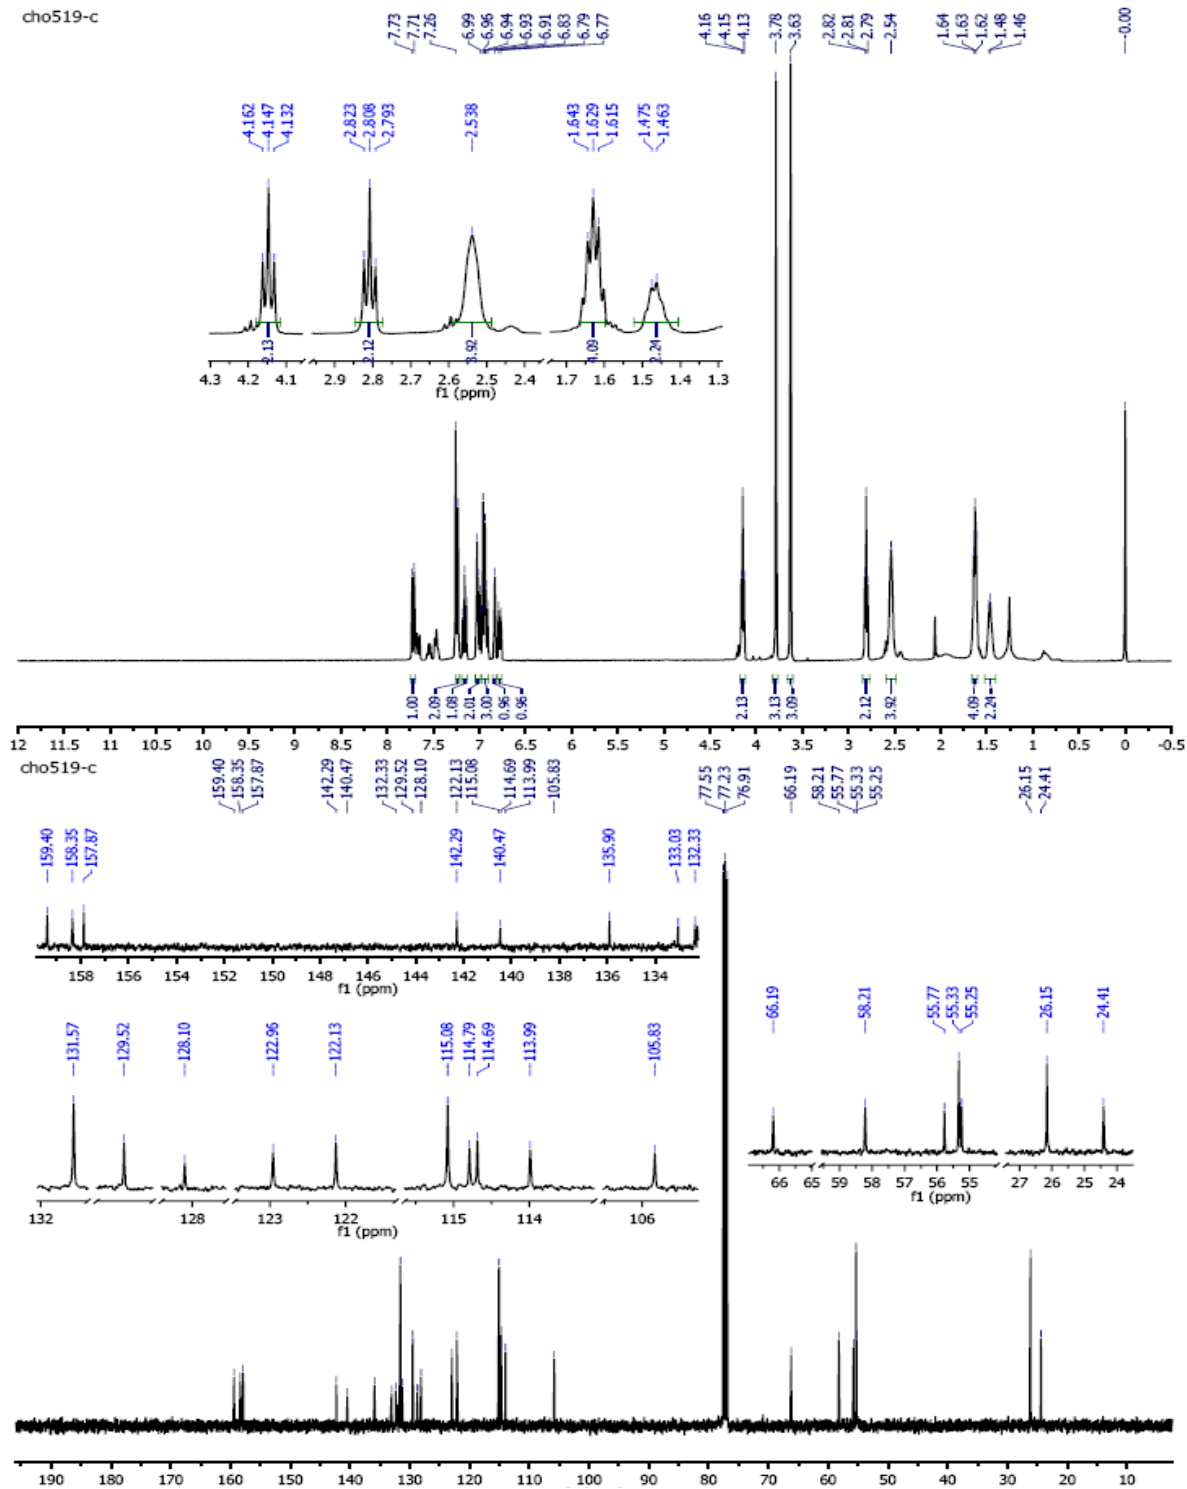

Compound 6{23}

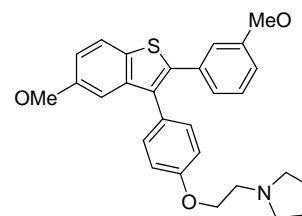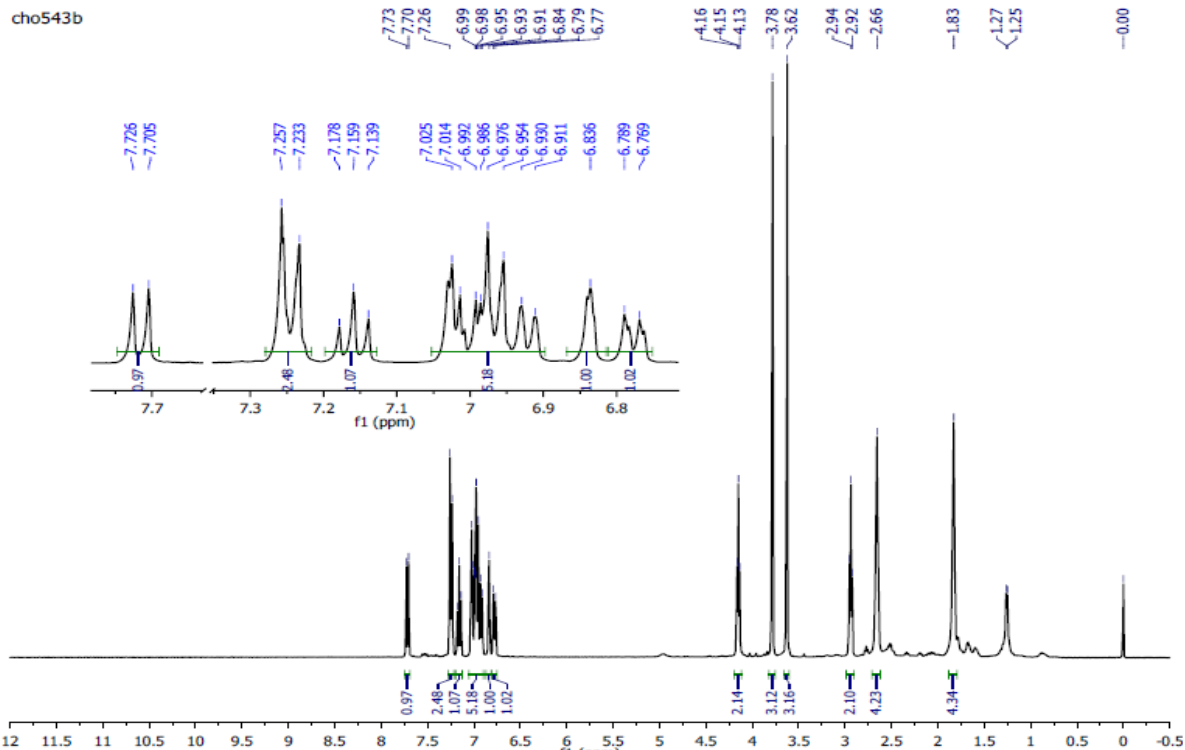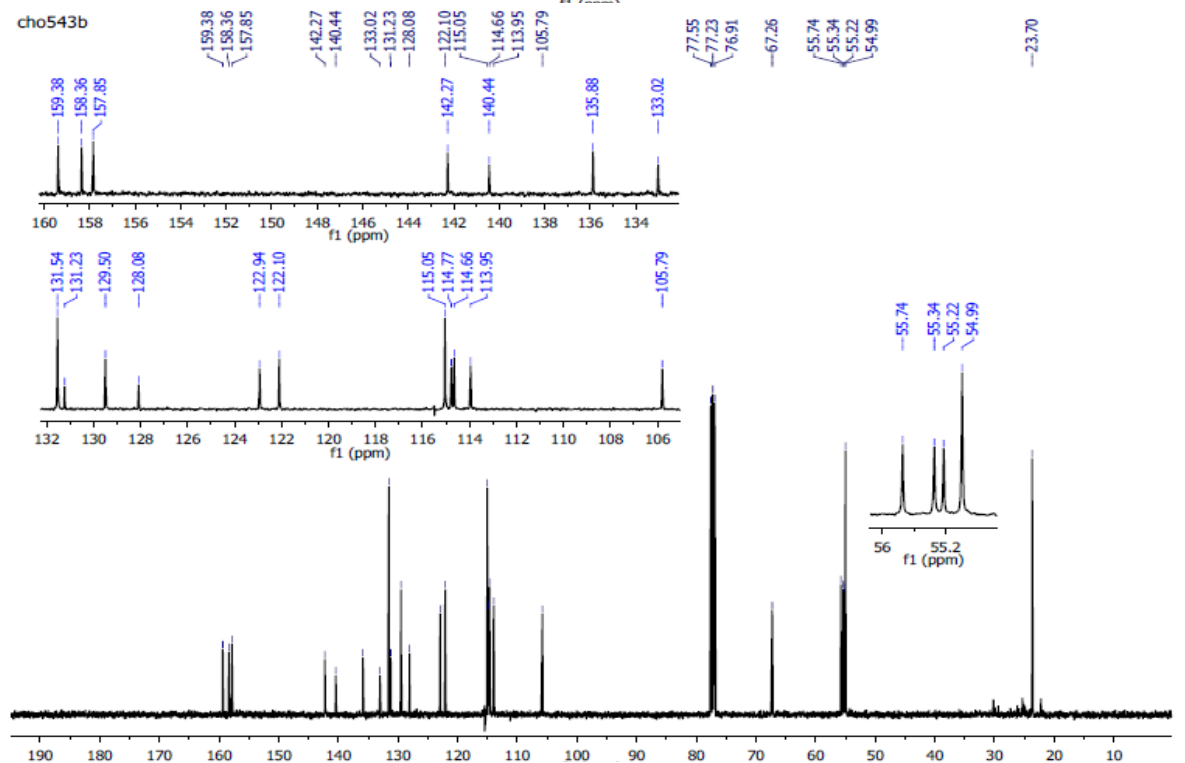

Compound 6{24}

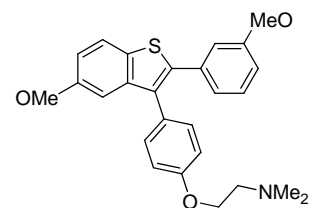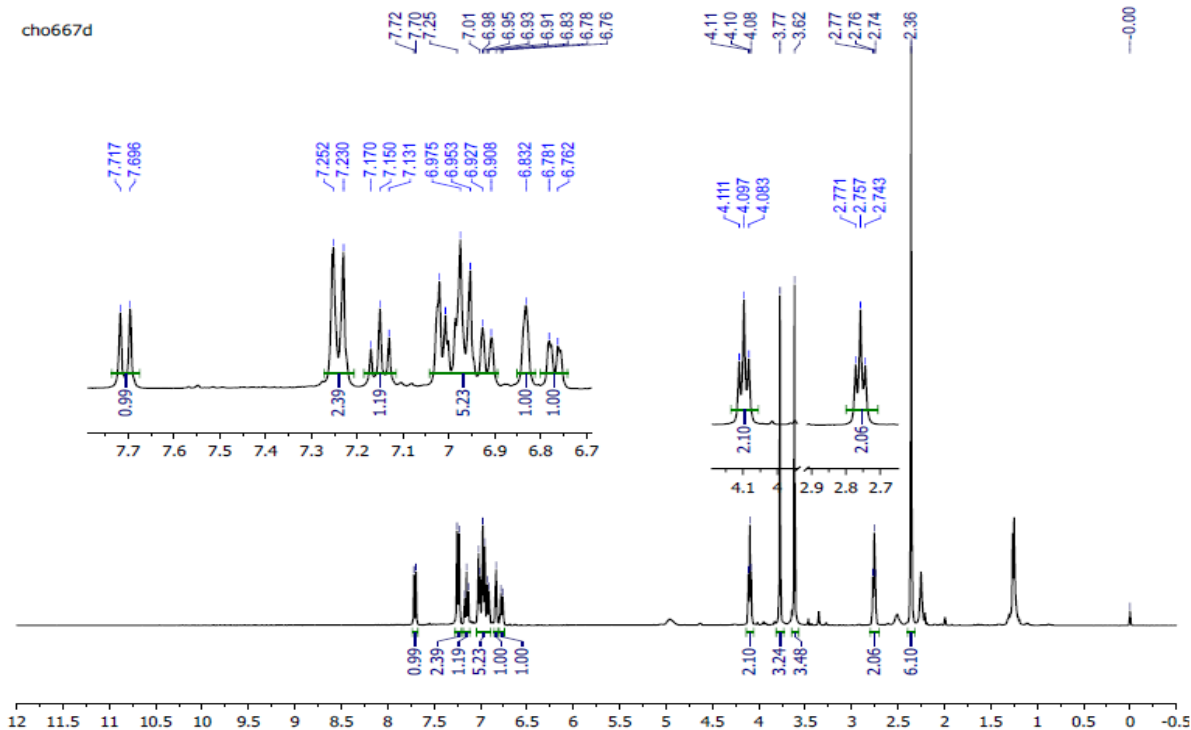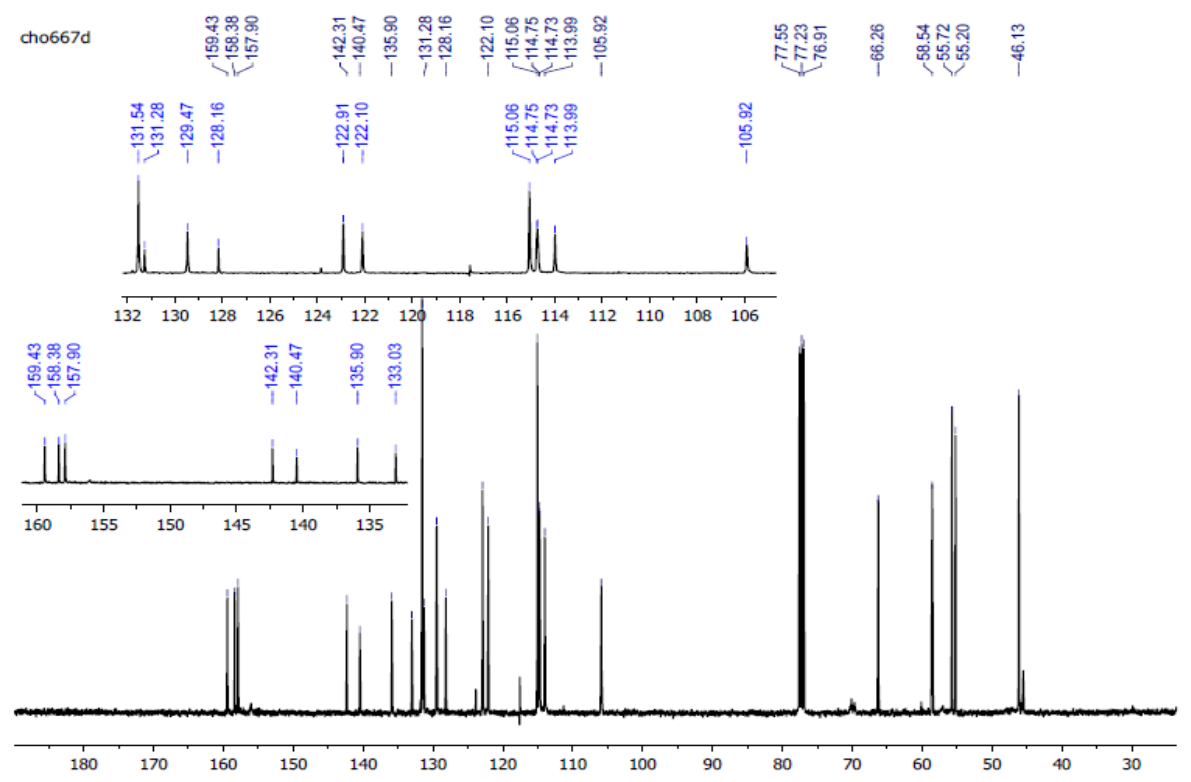

Compound 6{25}

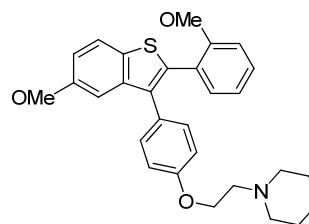

cho665a

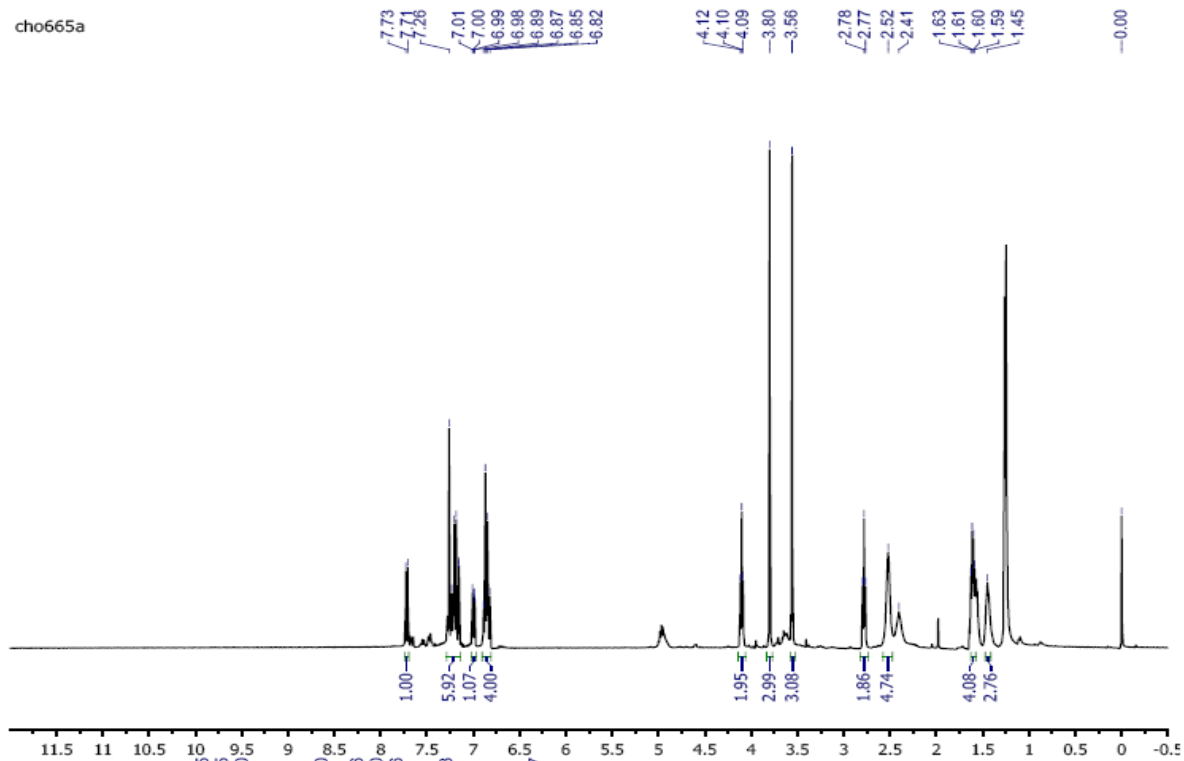

cho665a

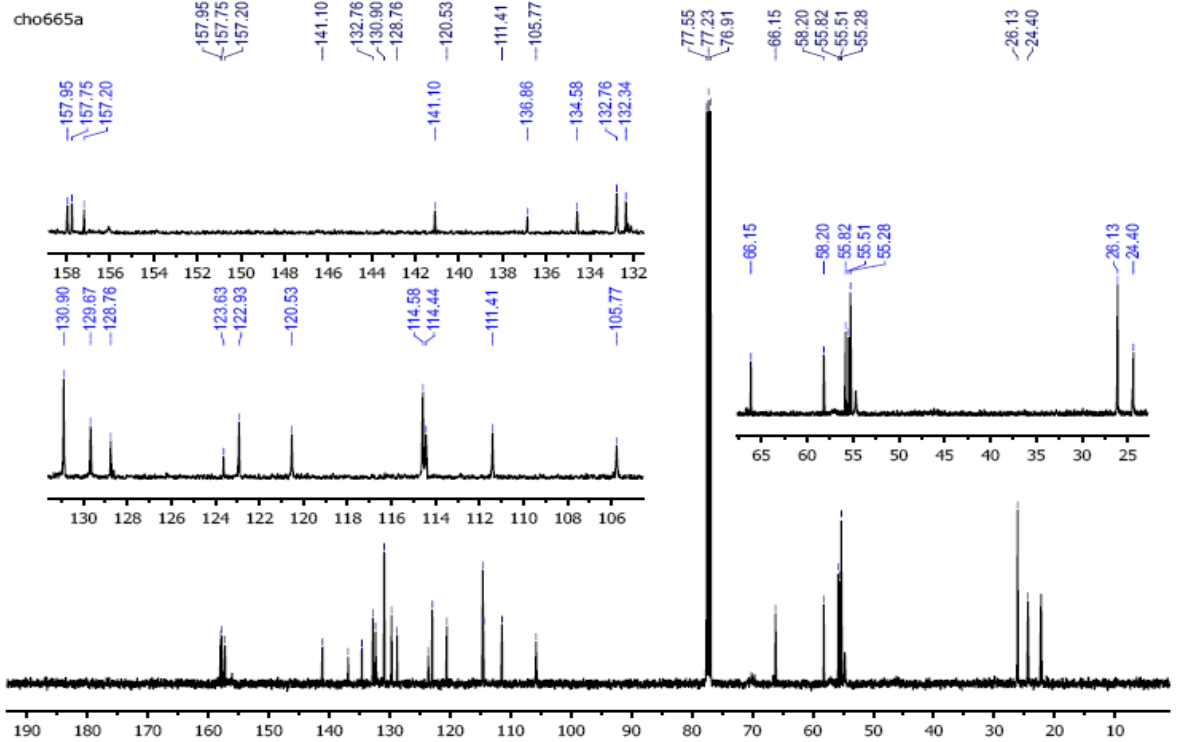

Compound 6{27}

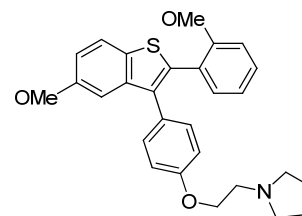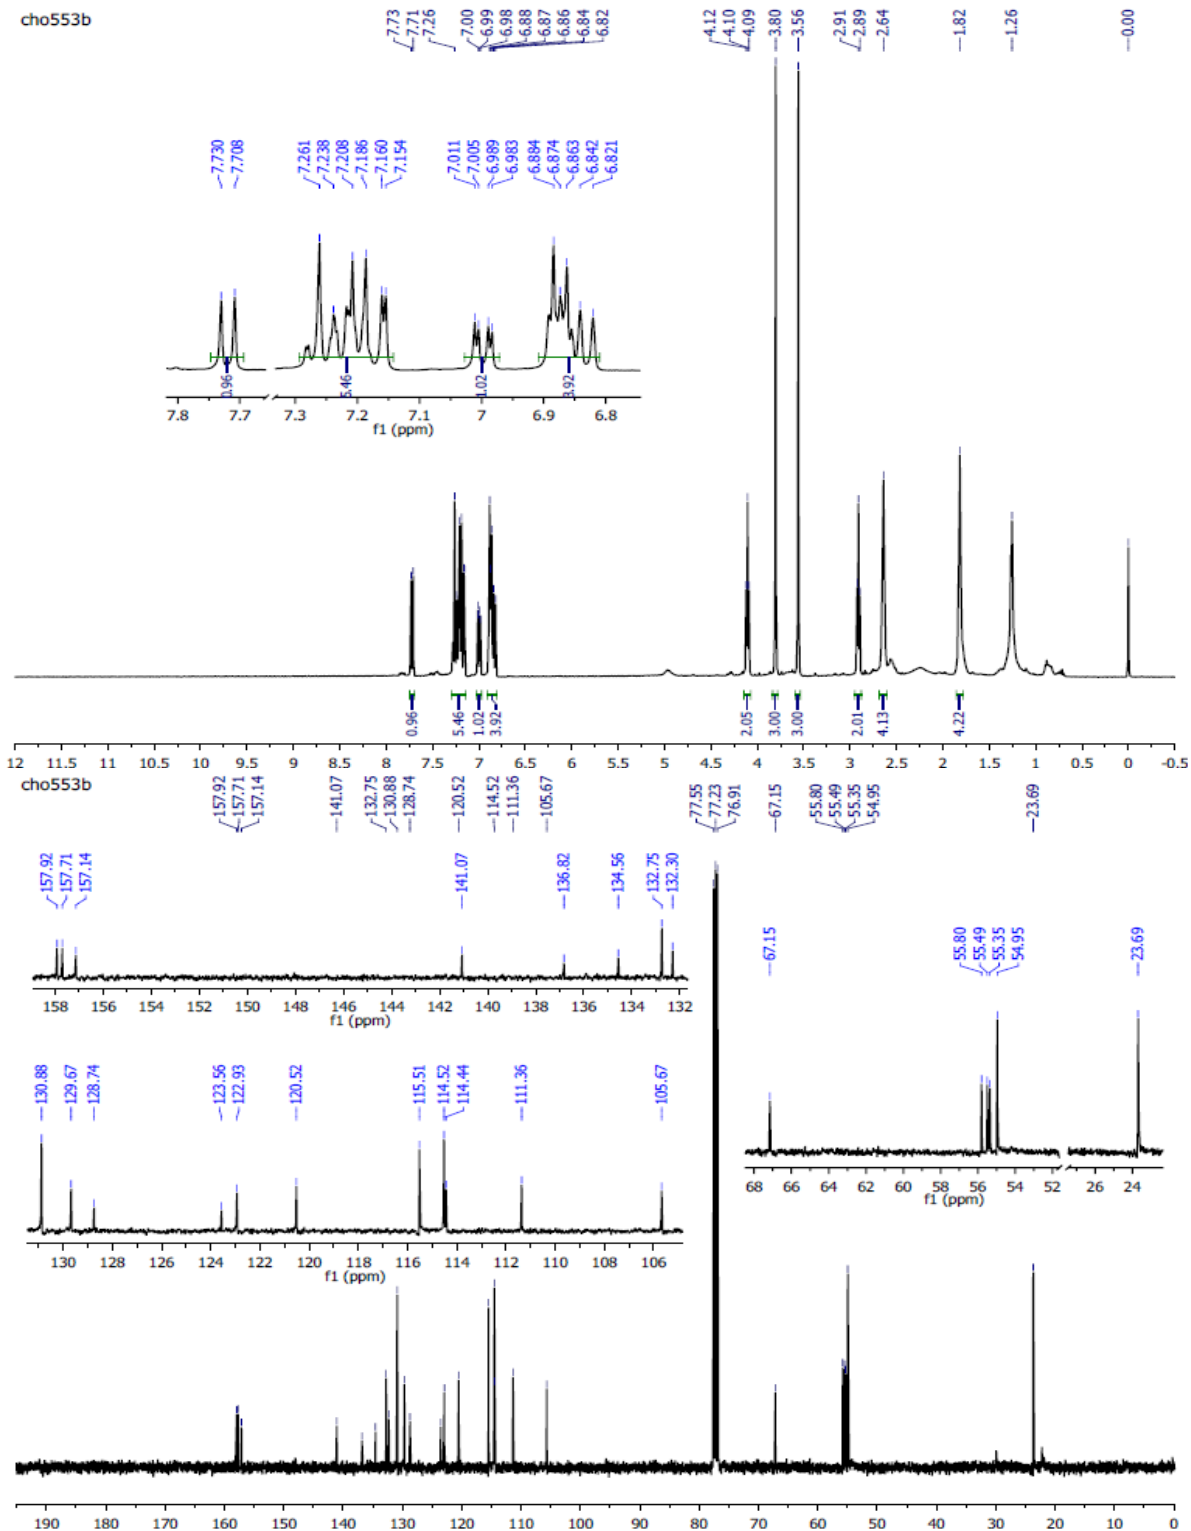

Compound 6{28}

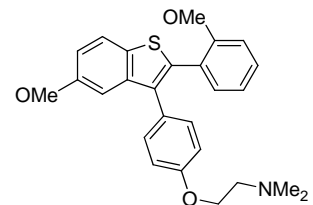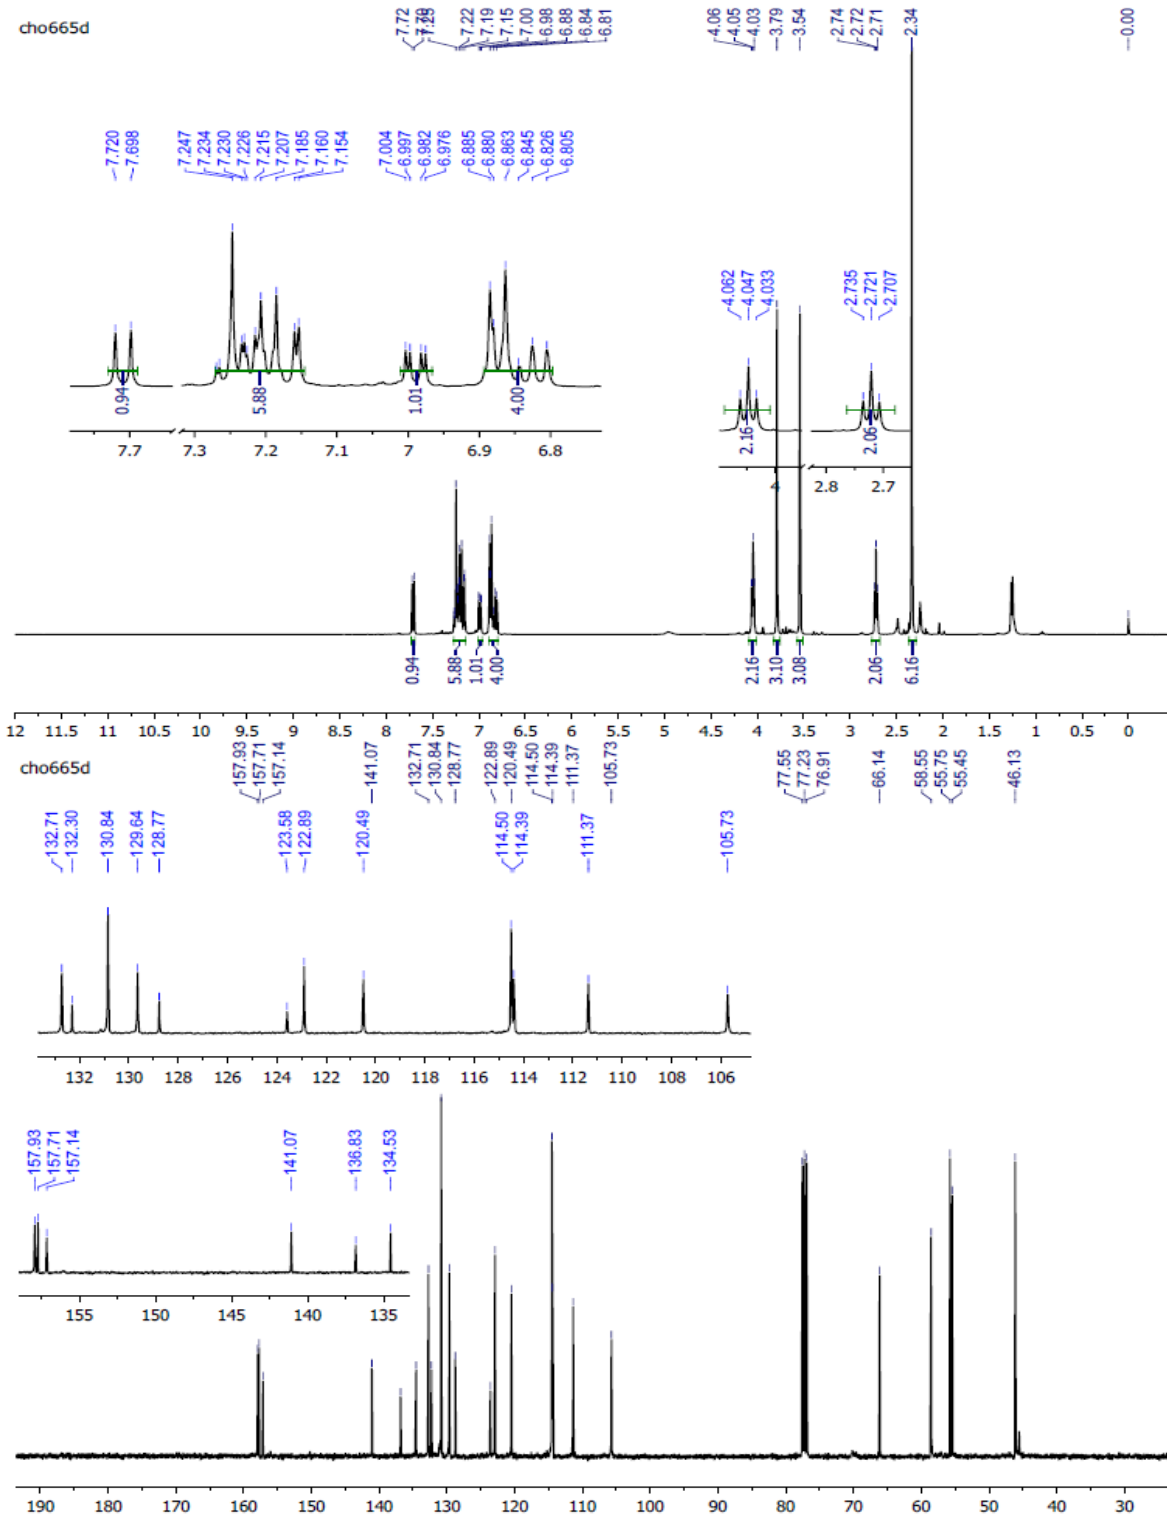

Compound 6{29}

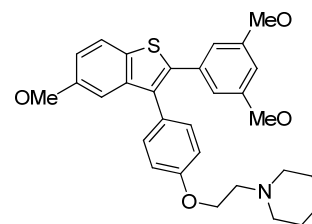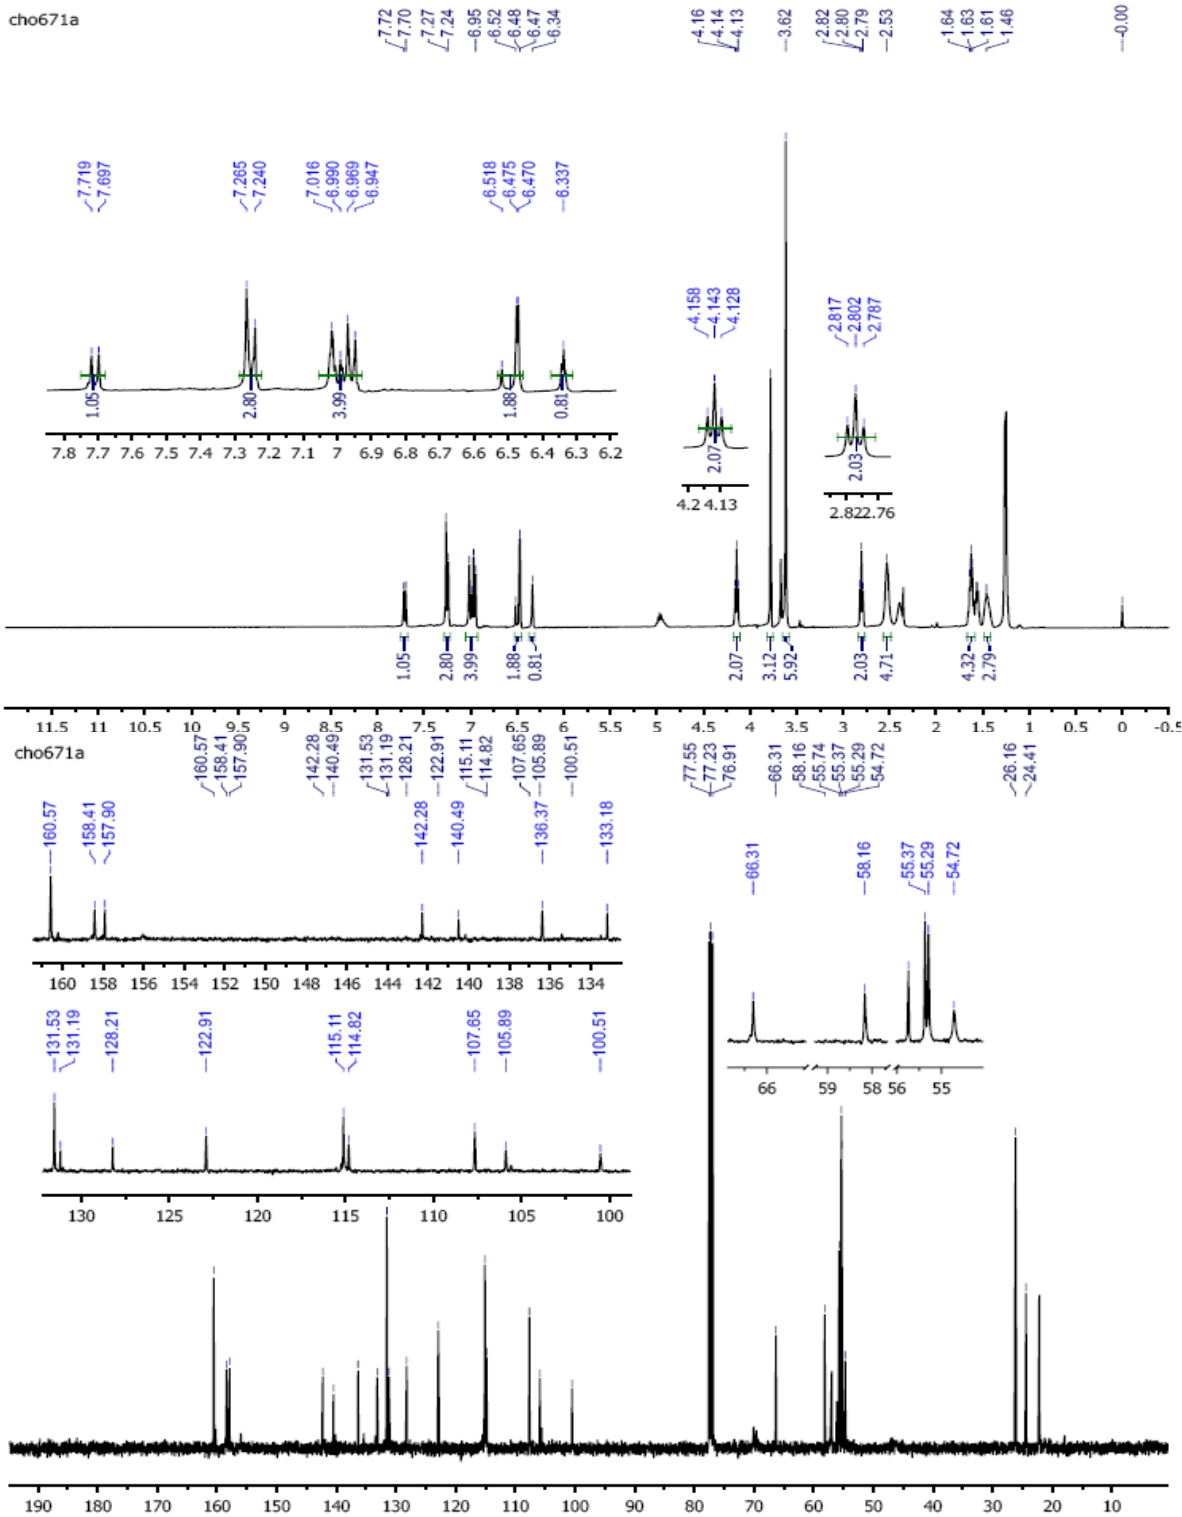

Compound 6{30}

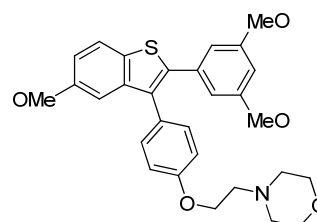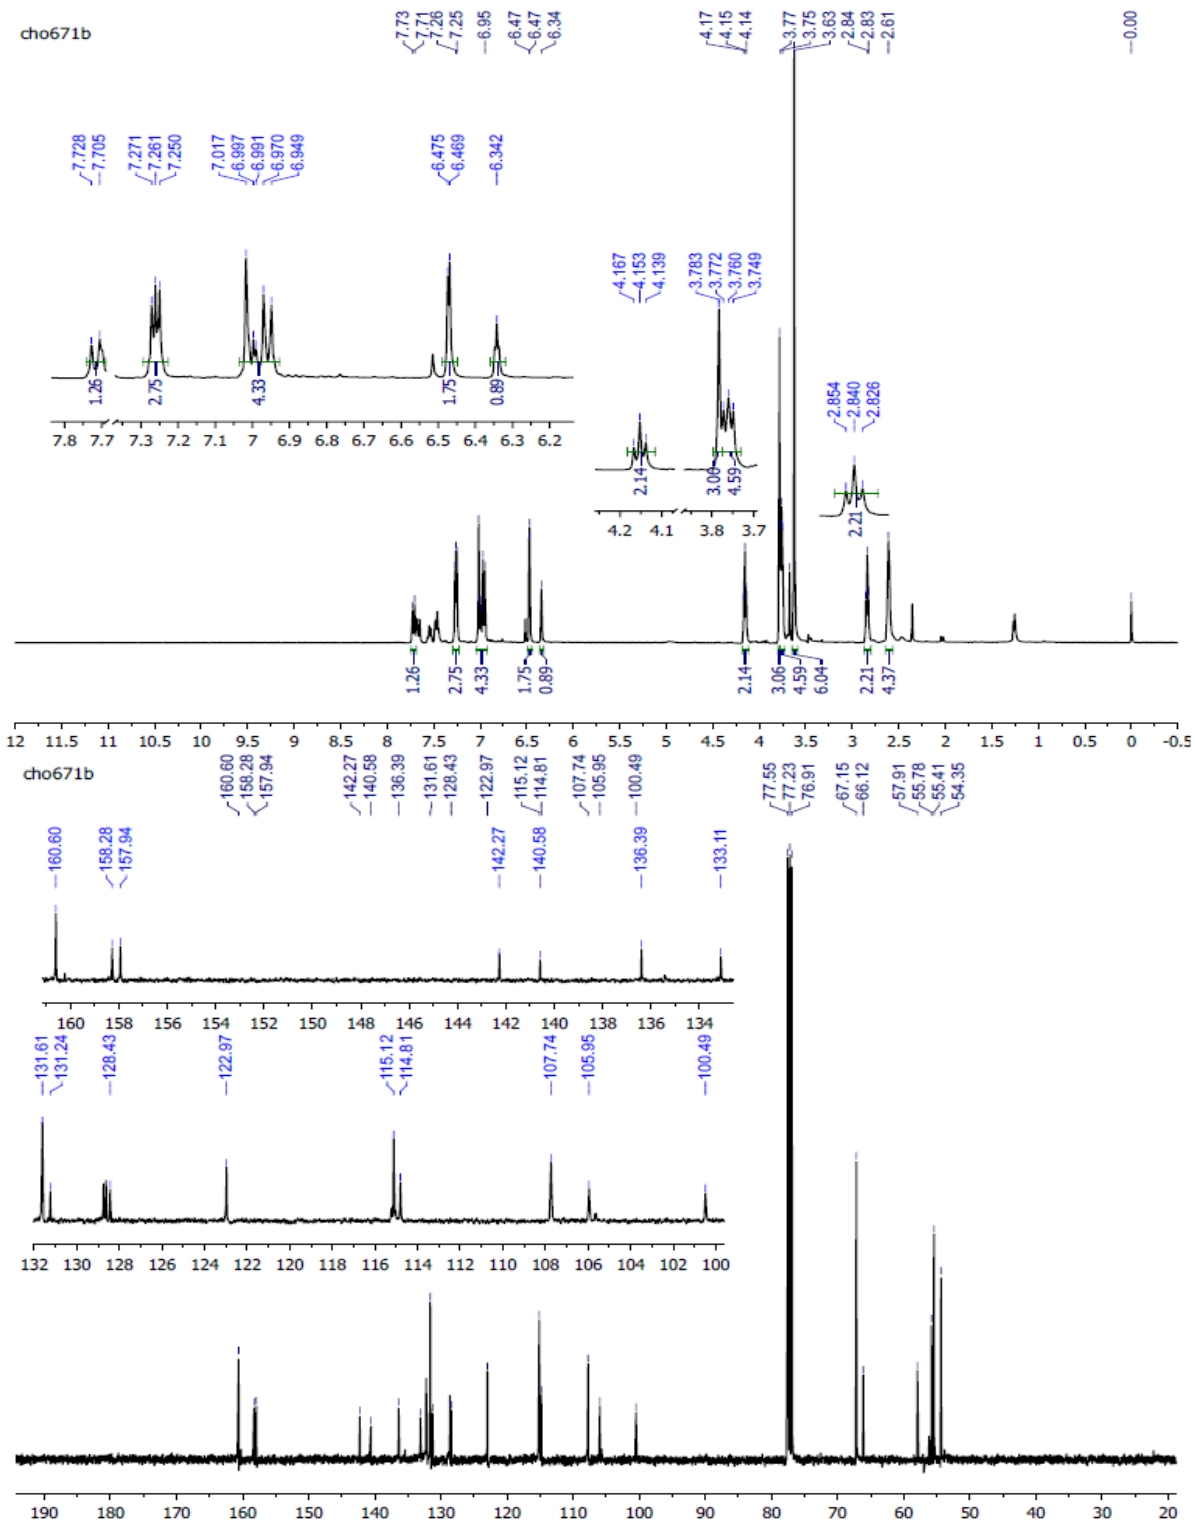



Compound 6{31}

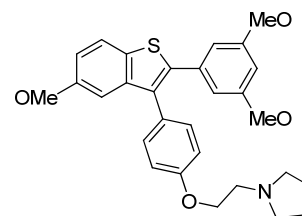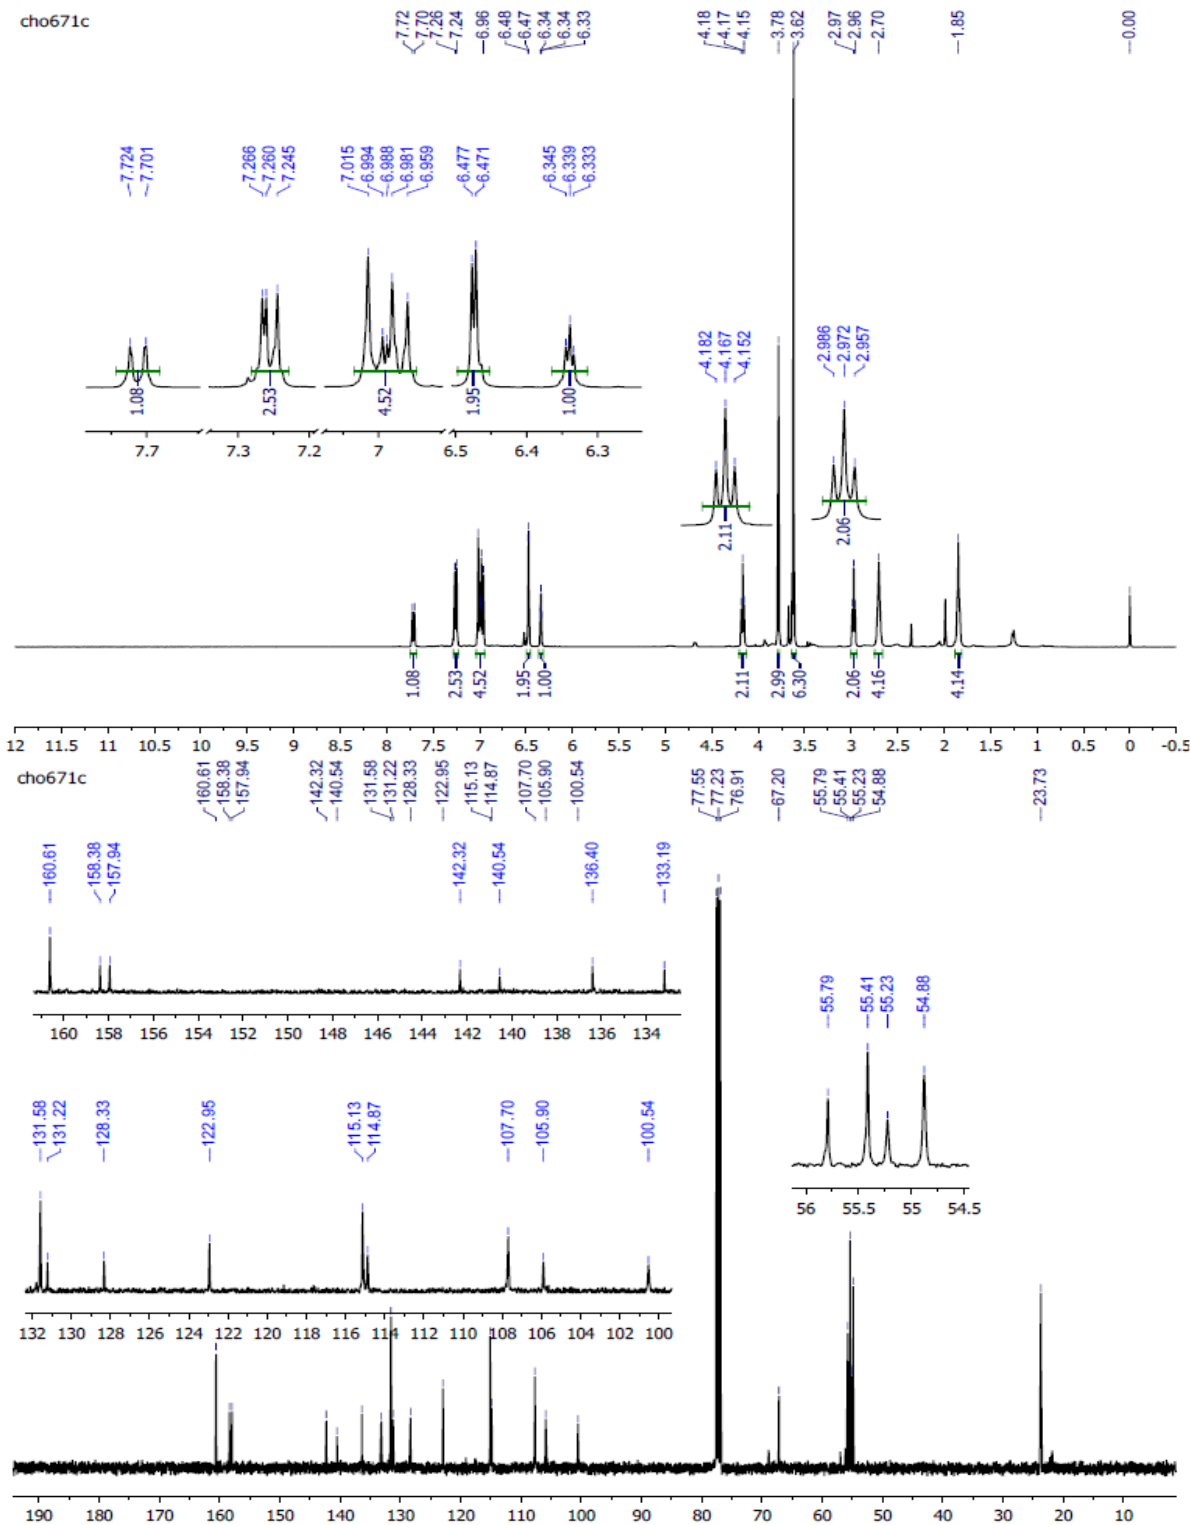

Compound 6{32}

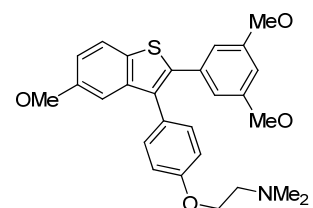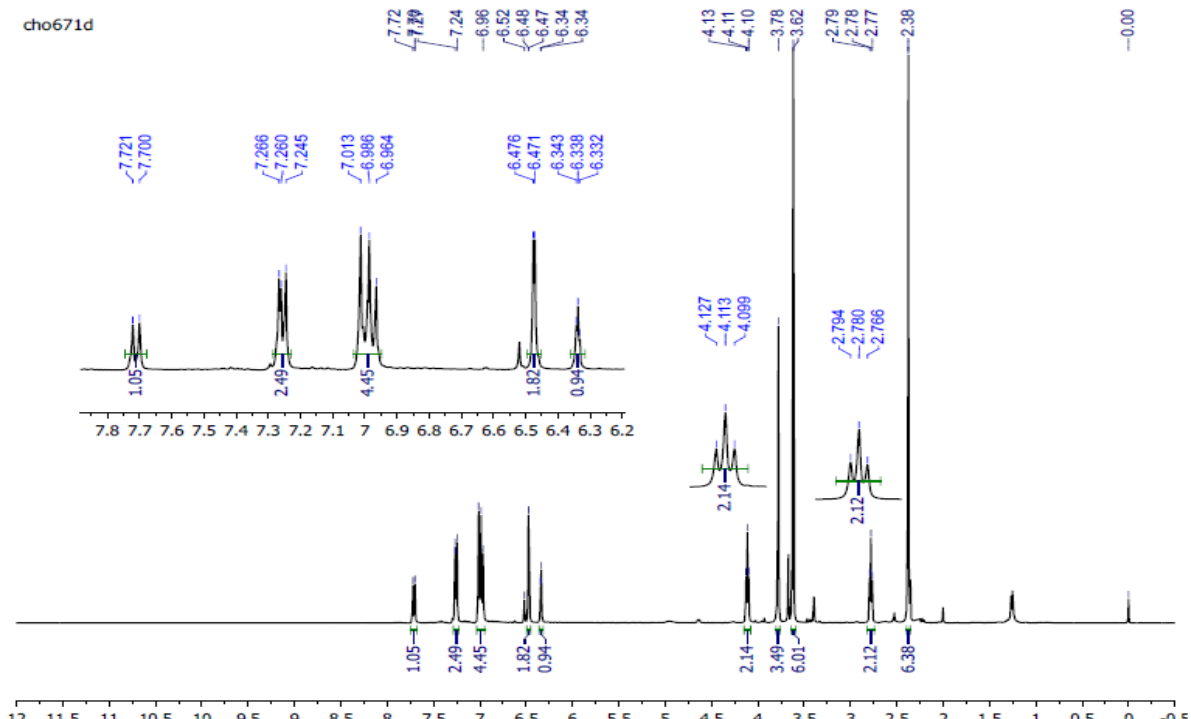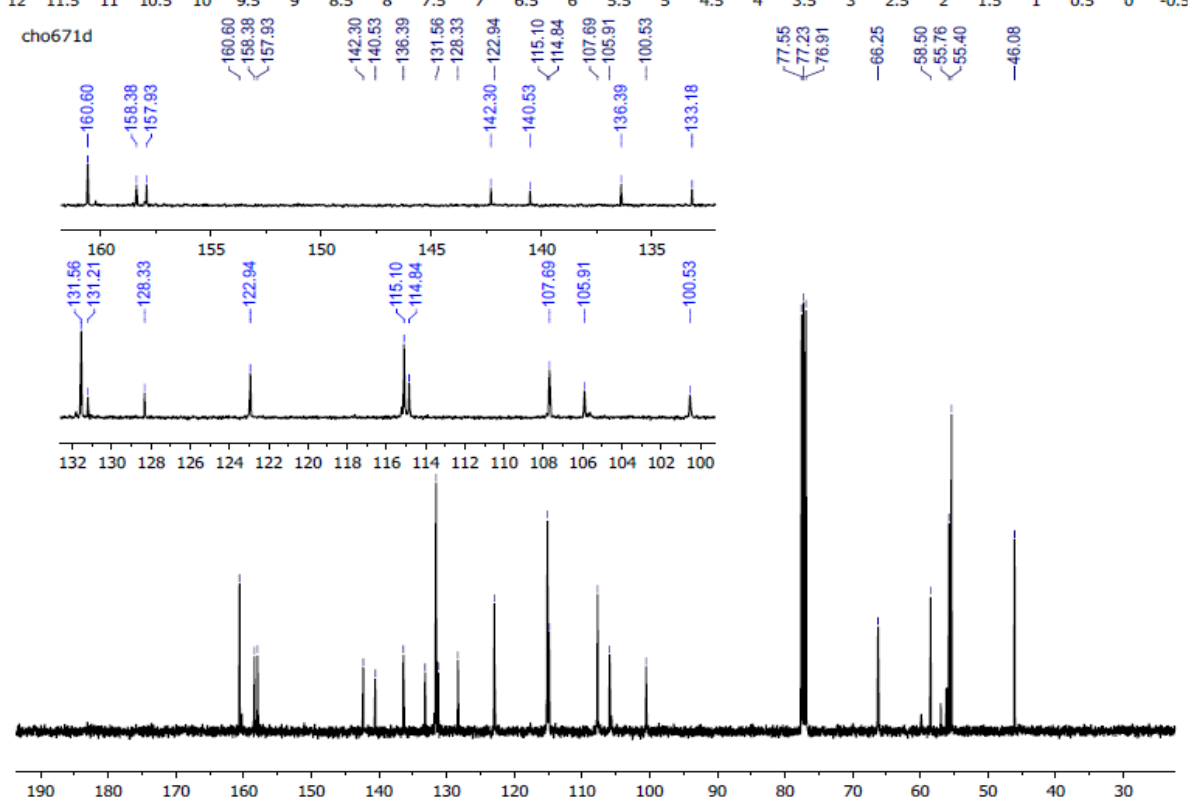

Compound 6{33}

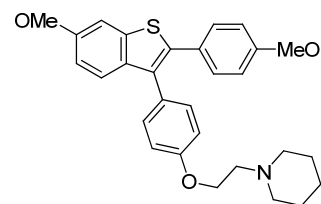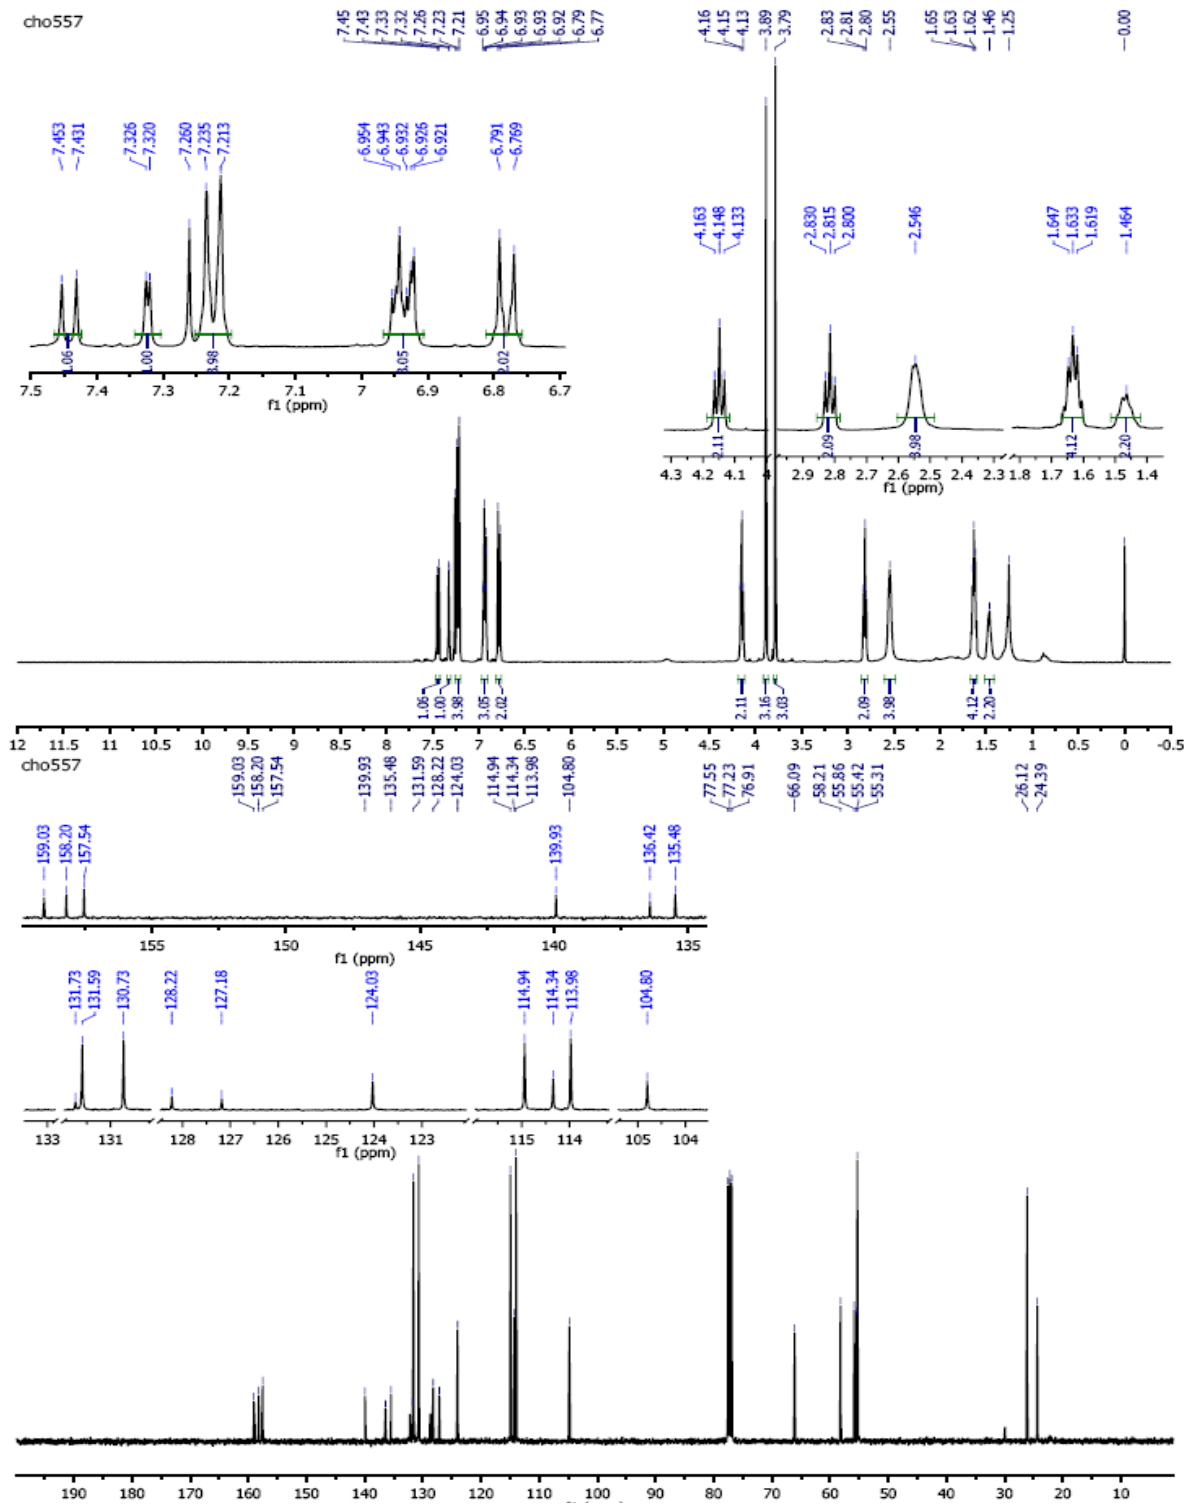

Compound 6{34}

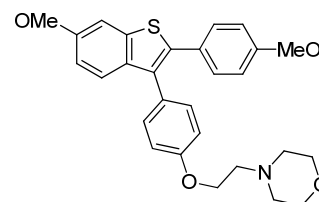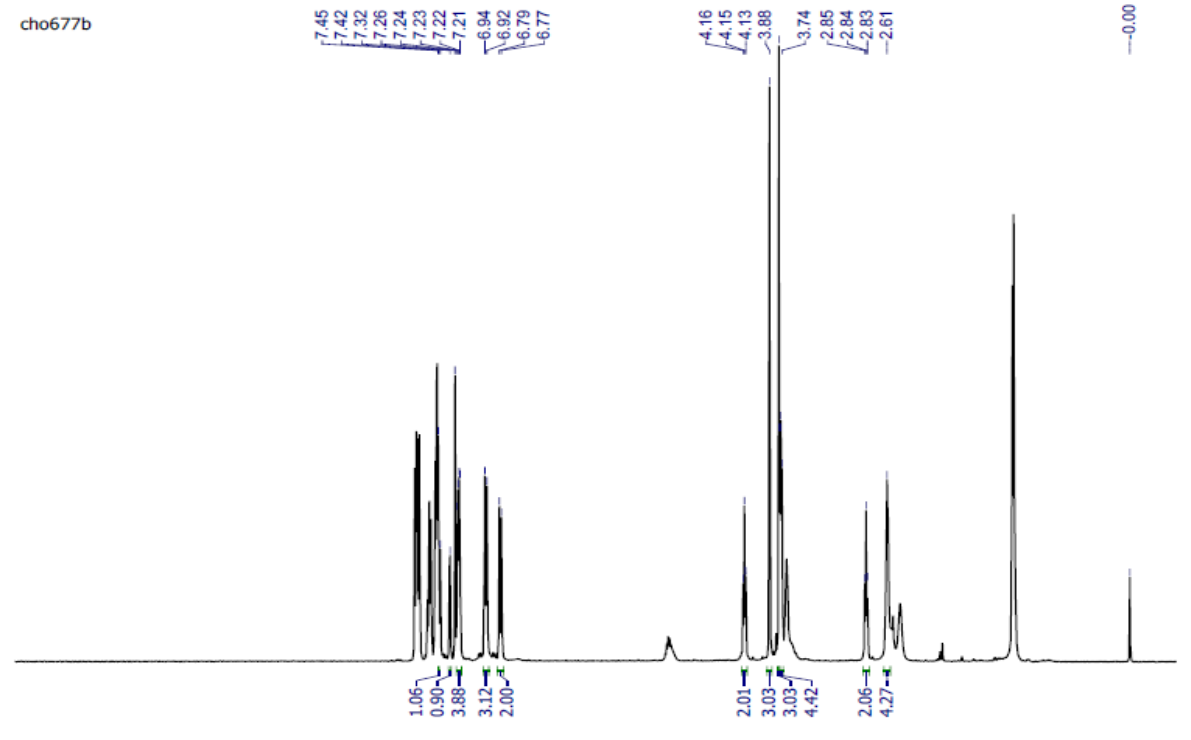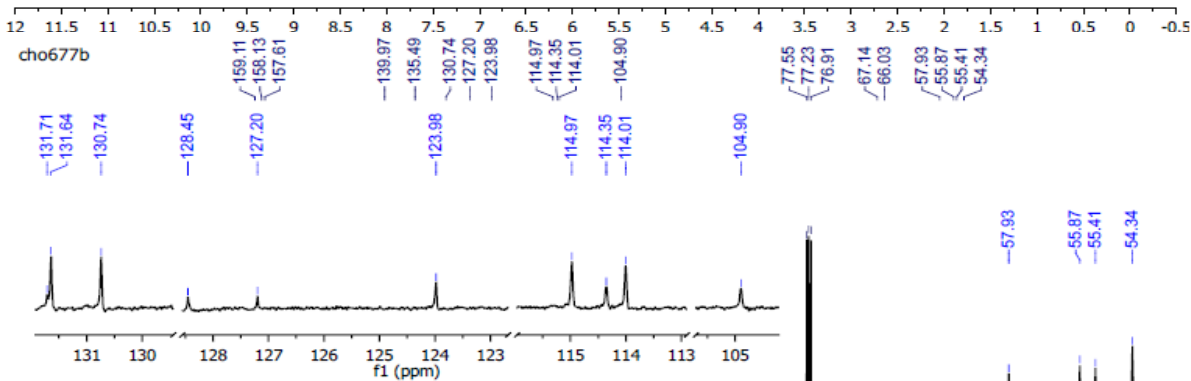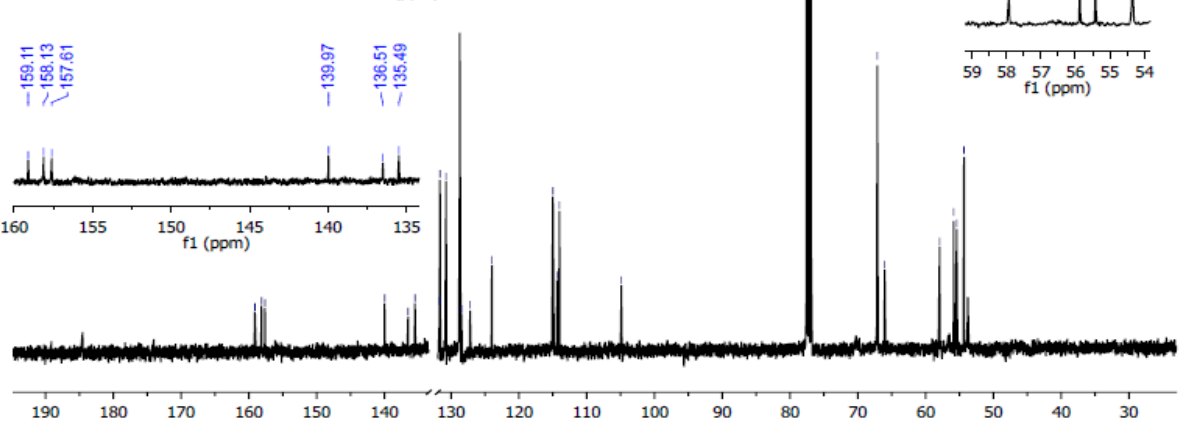

Compound 6{35}

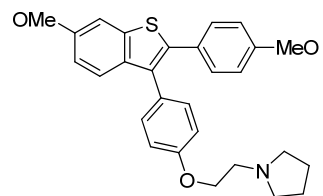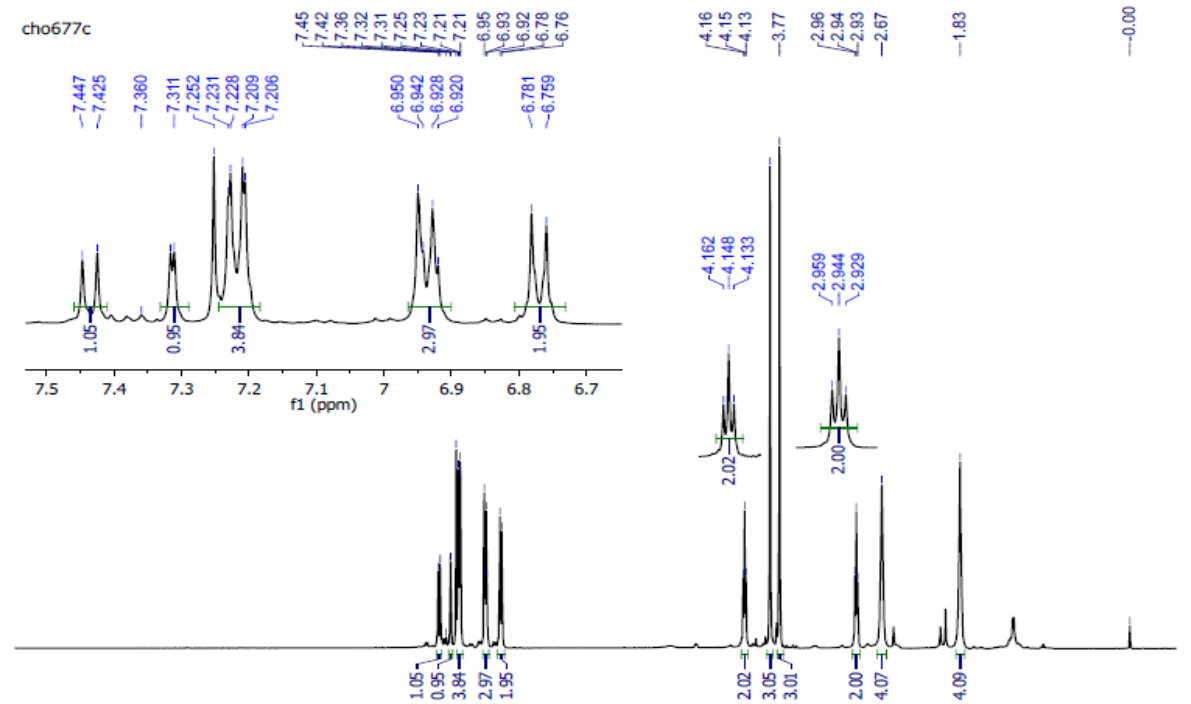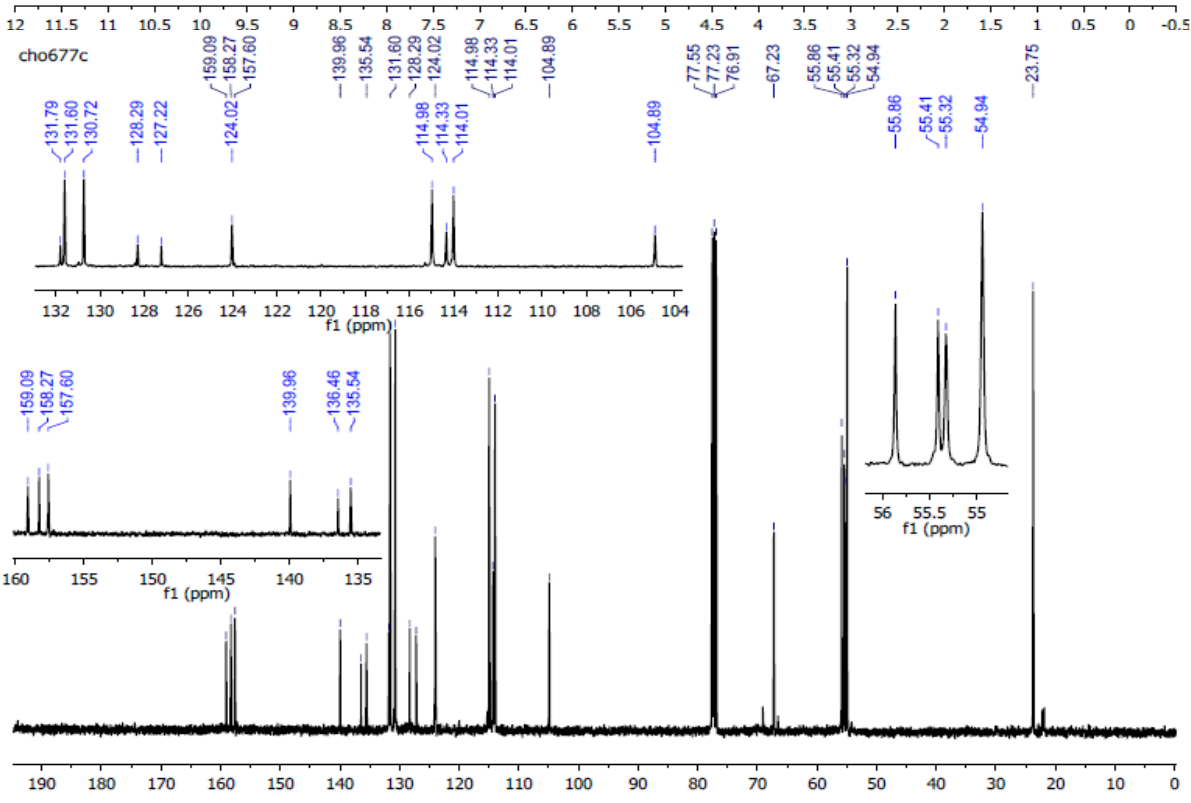

Compound 6{36}

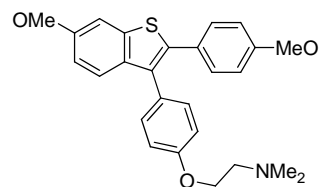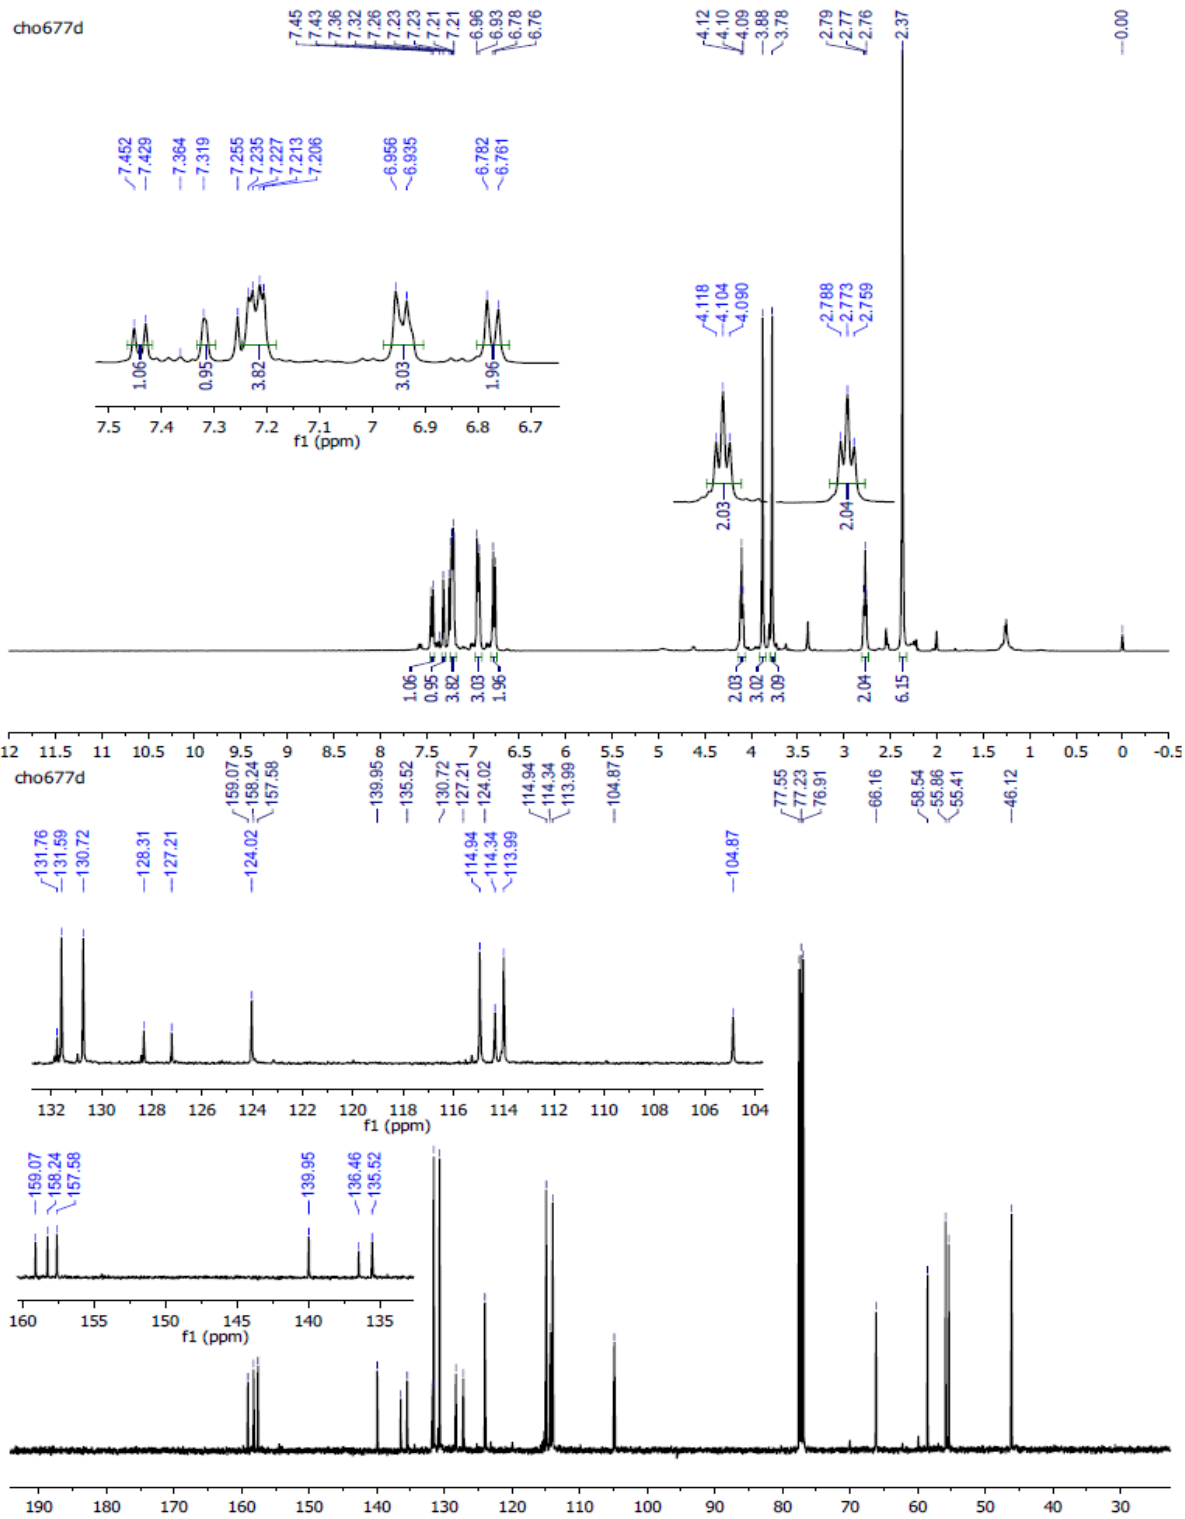

Compound 6{37}

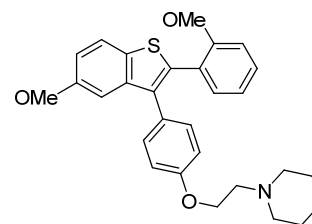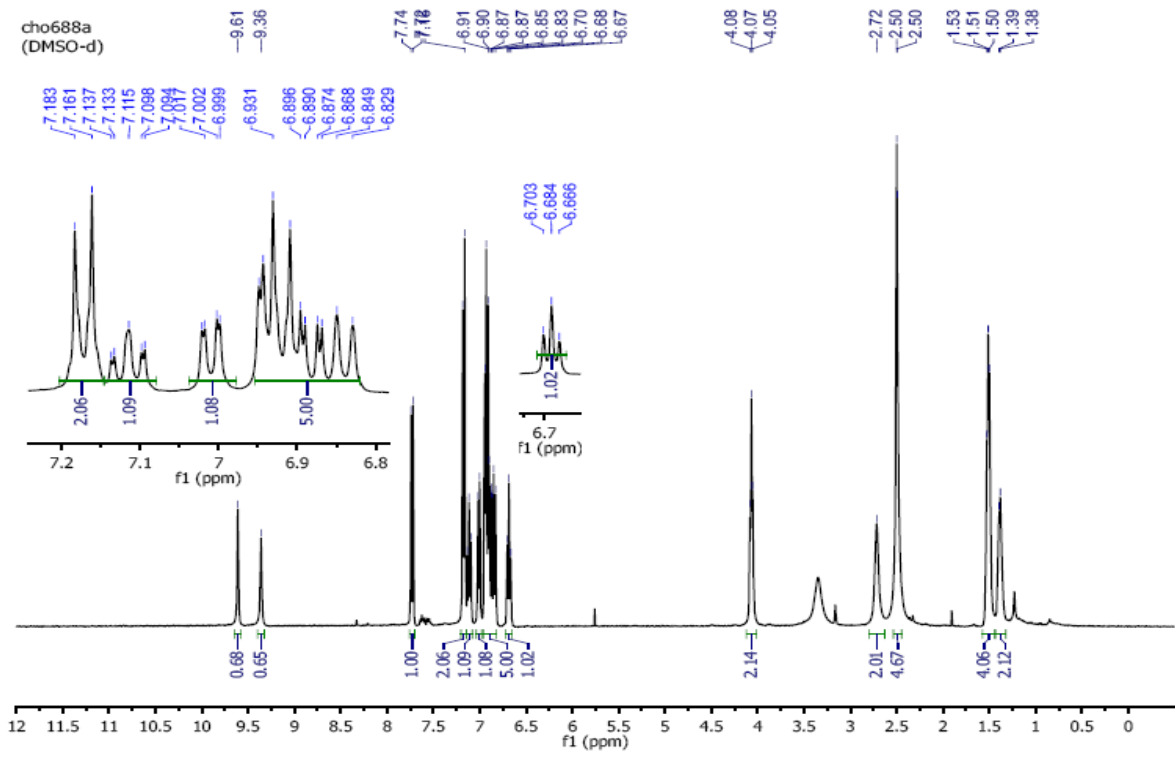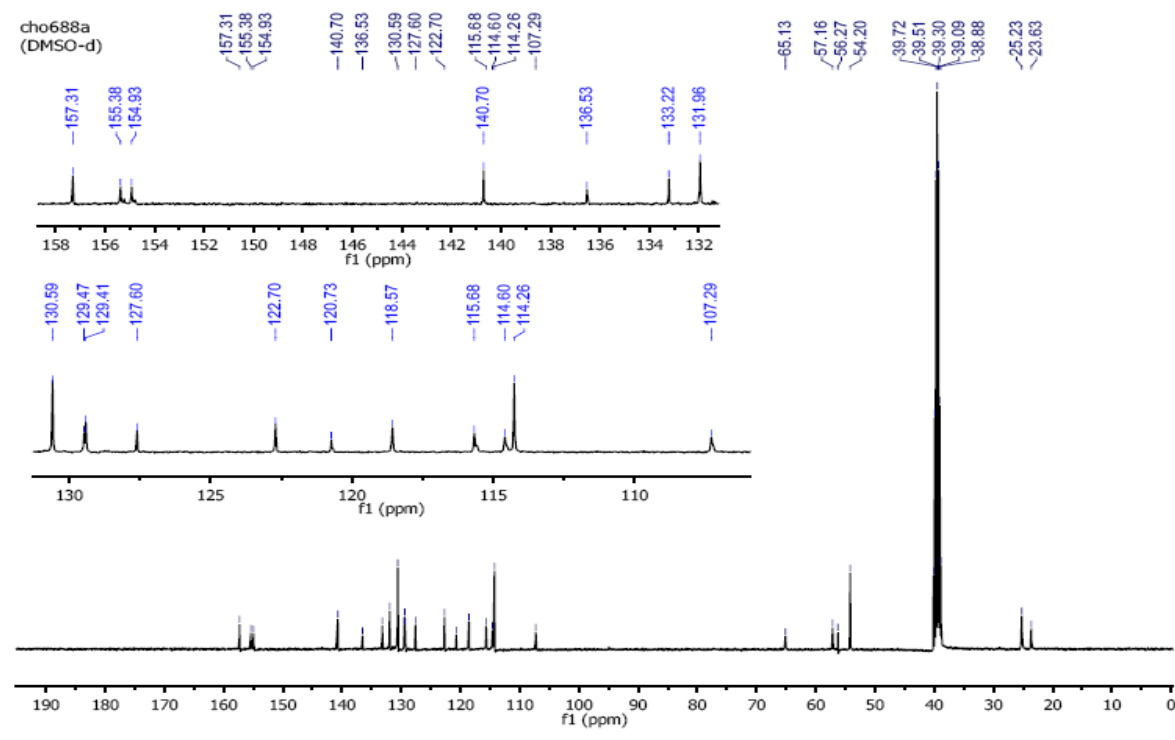

Compound 6{39}

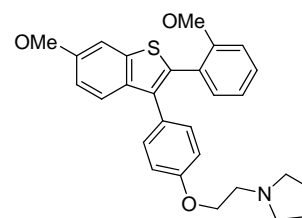

cho583b

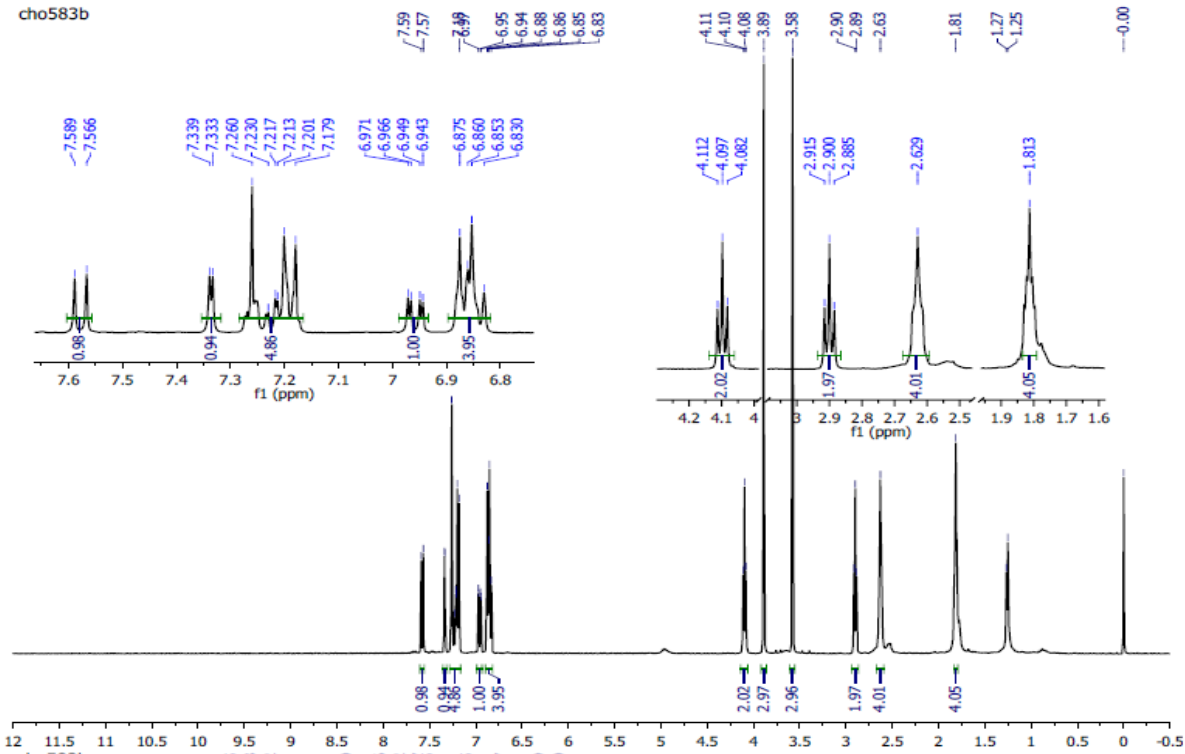

cho583b

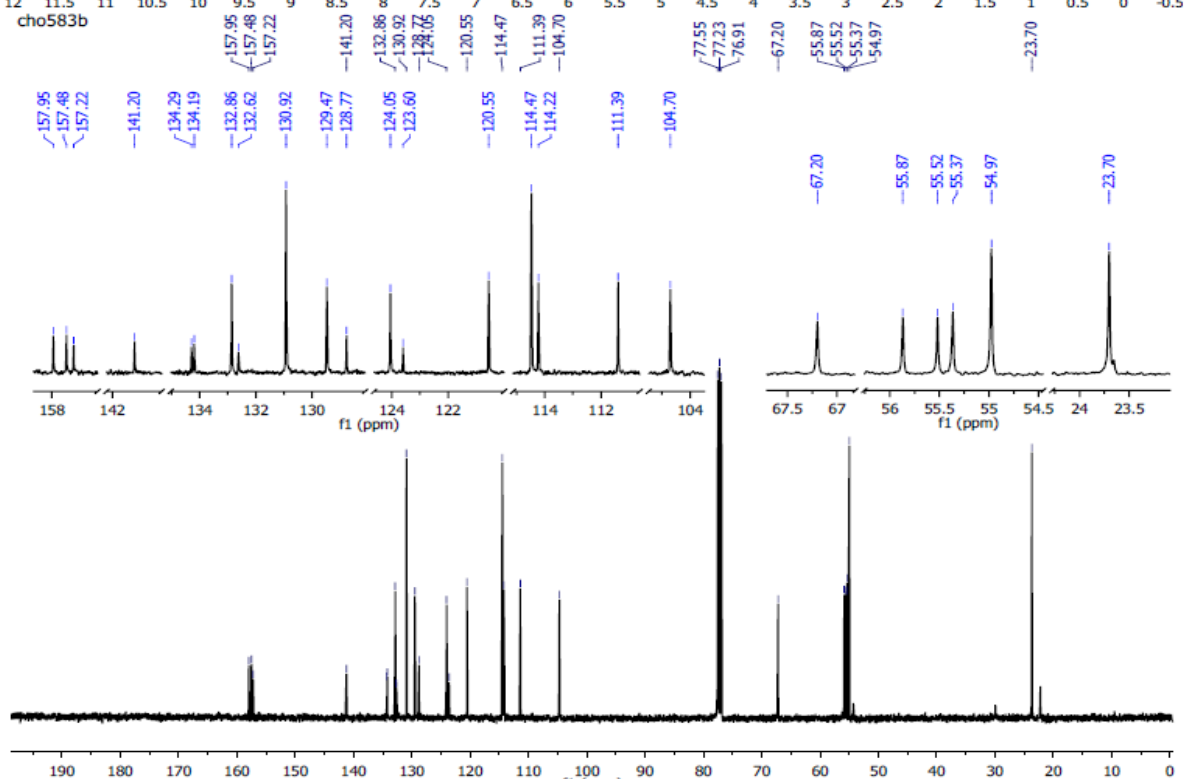



Compound 6{40}

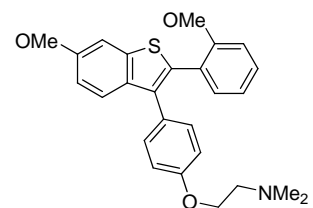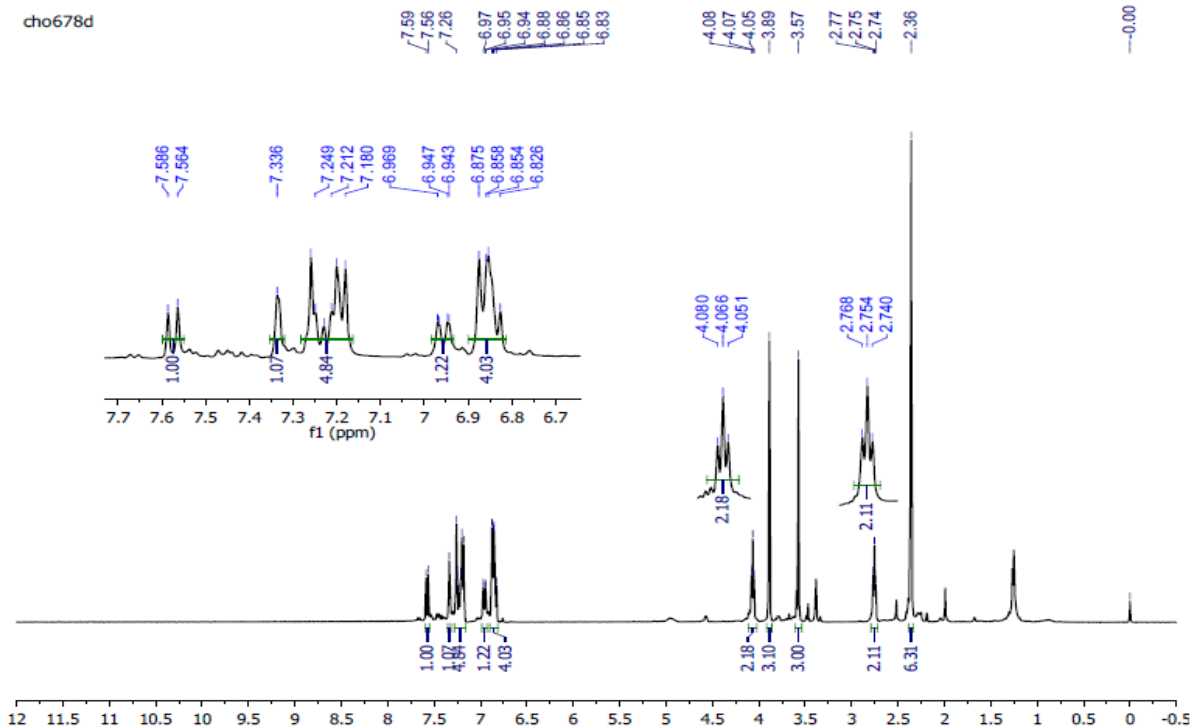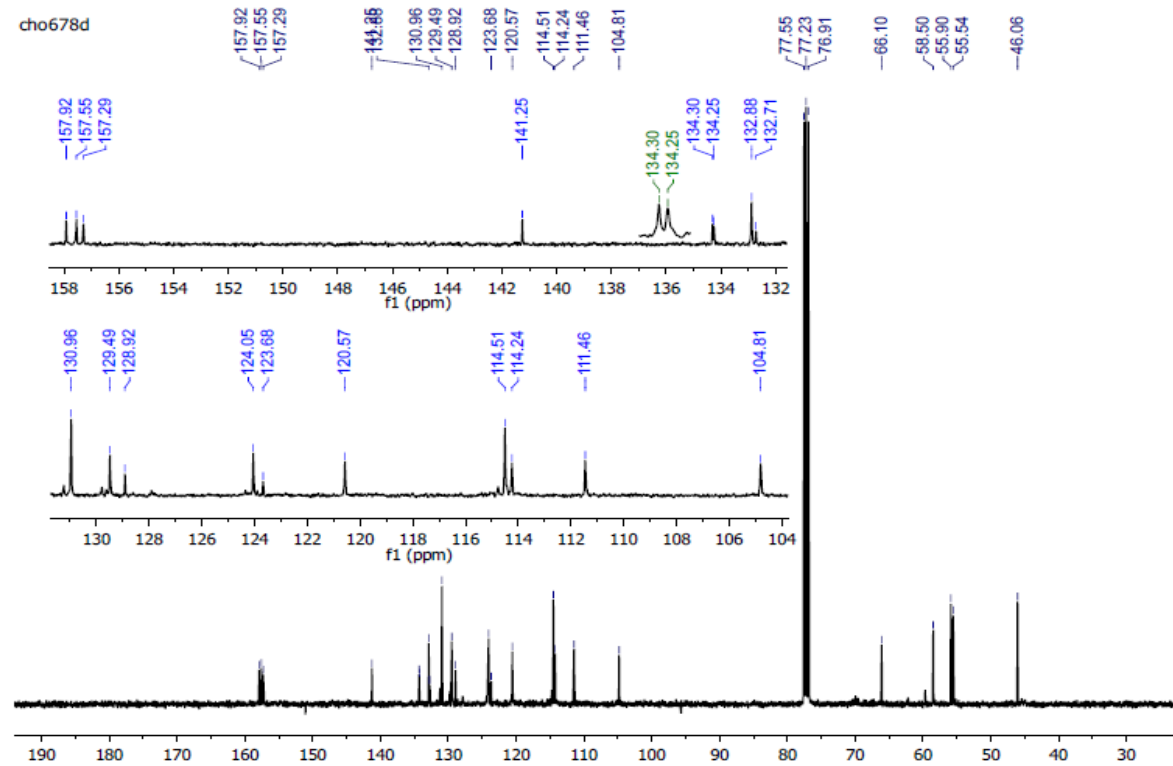

Compound 6{41}

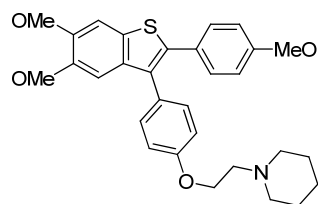

cho649a

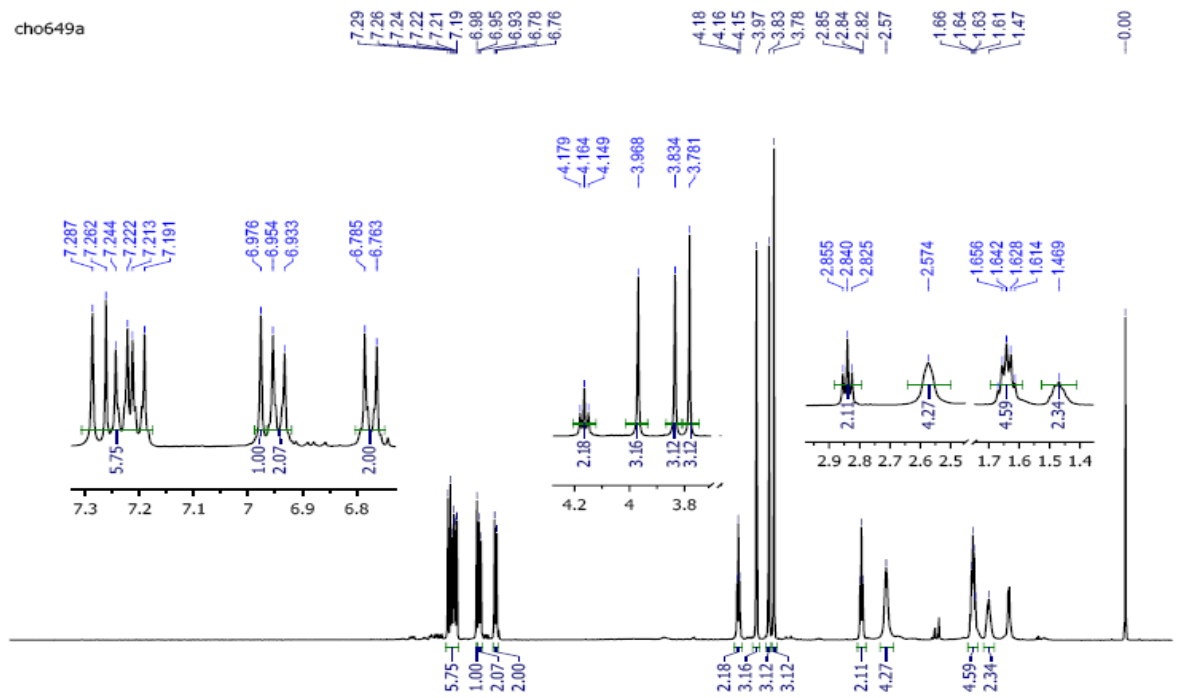

cho649a

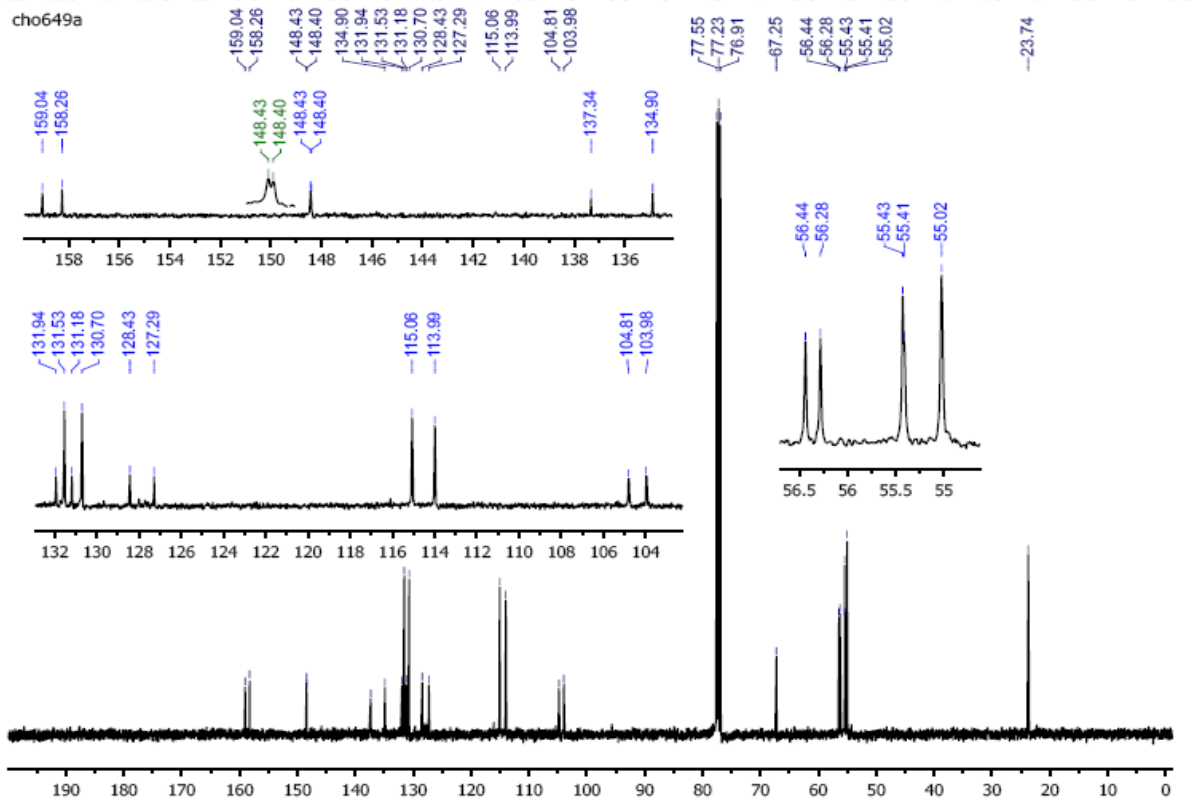

Compound 6{43}

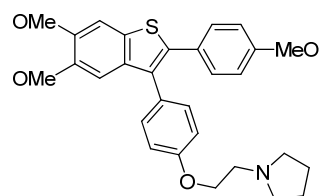

cho649c

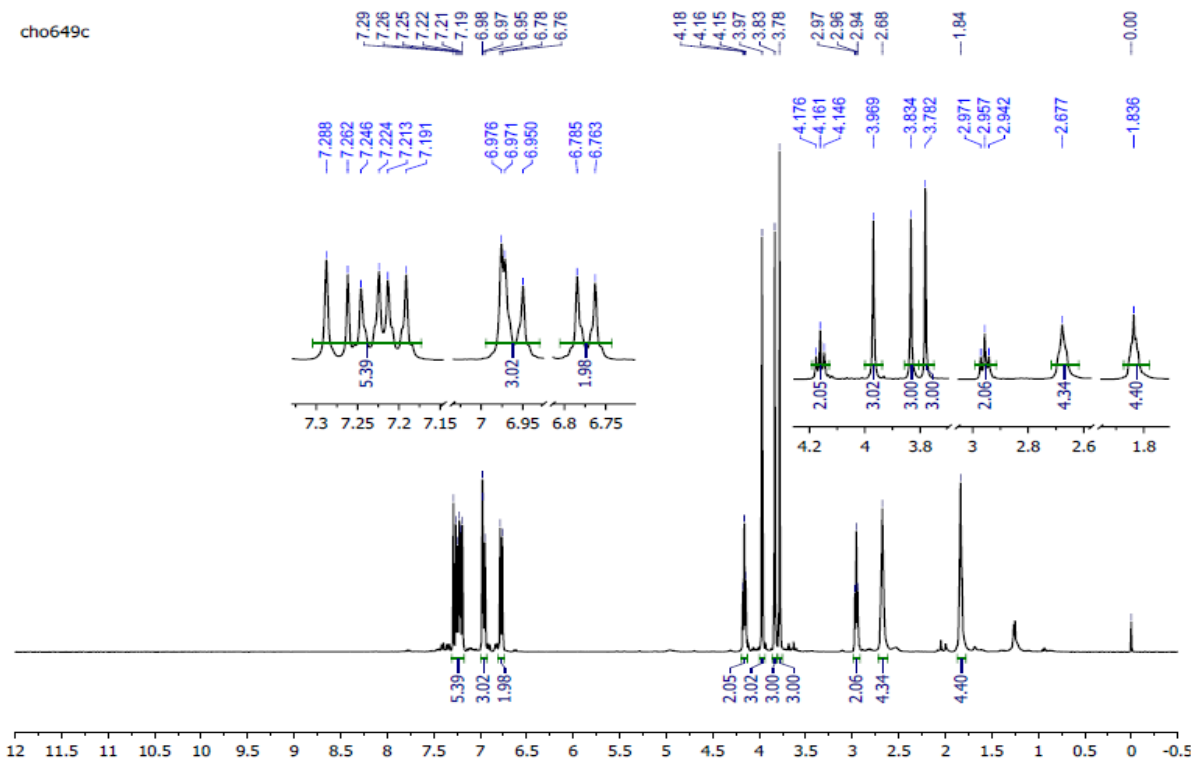

cho649c

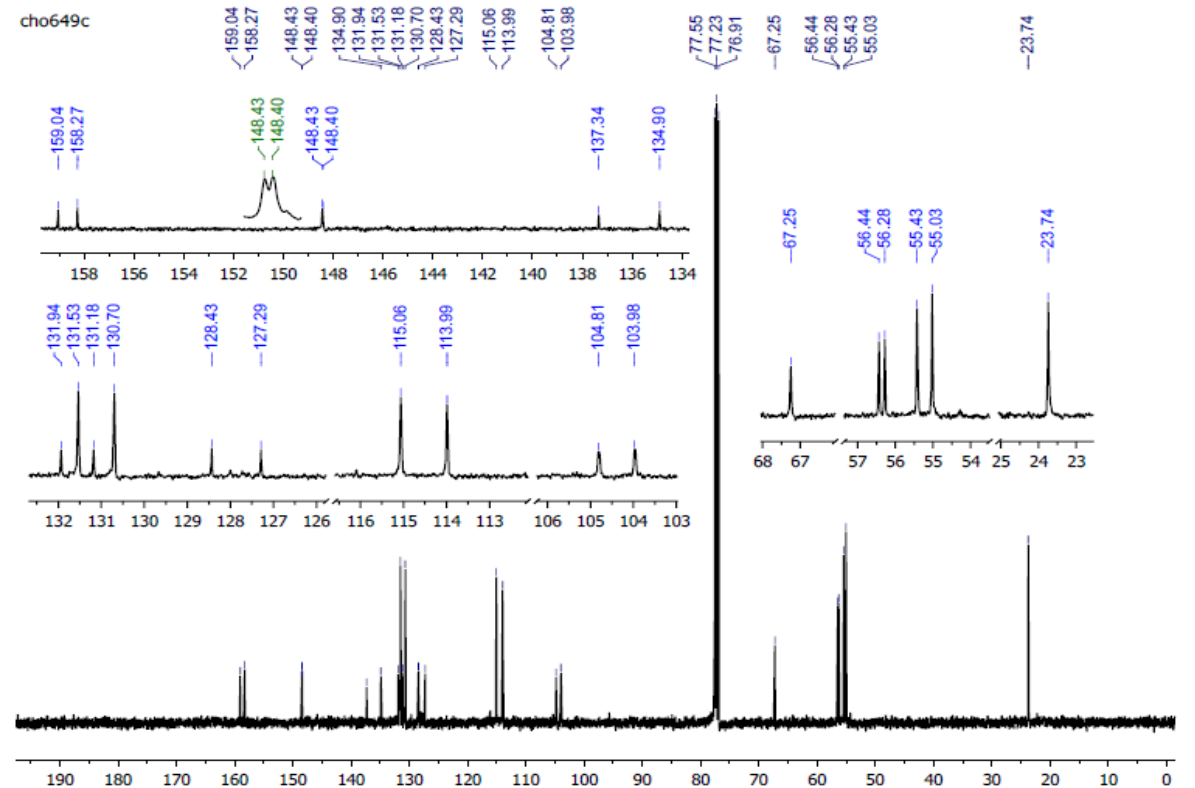

Compound 6{44}

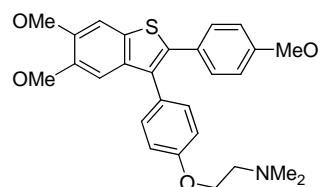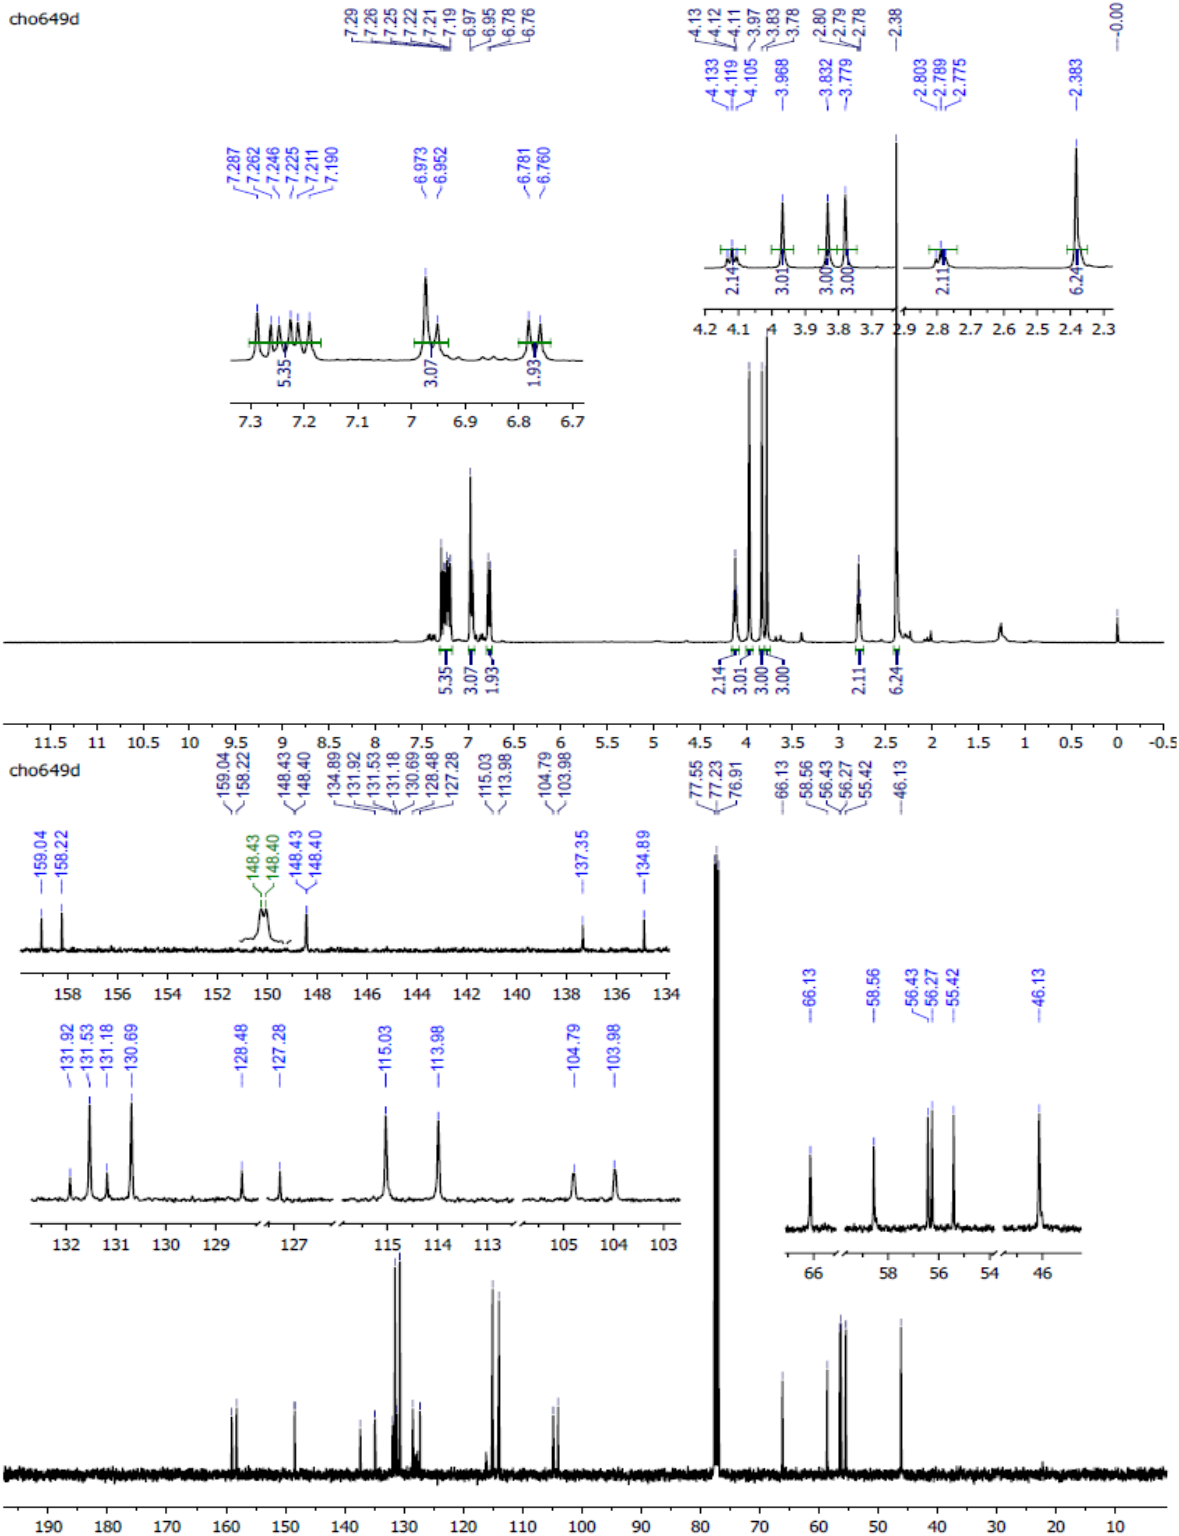

Compound 6{45}

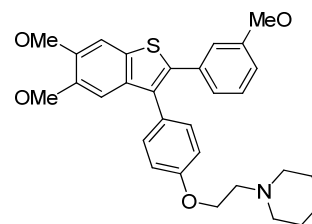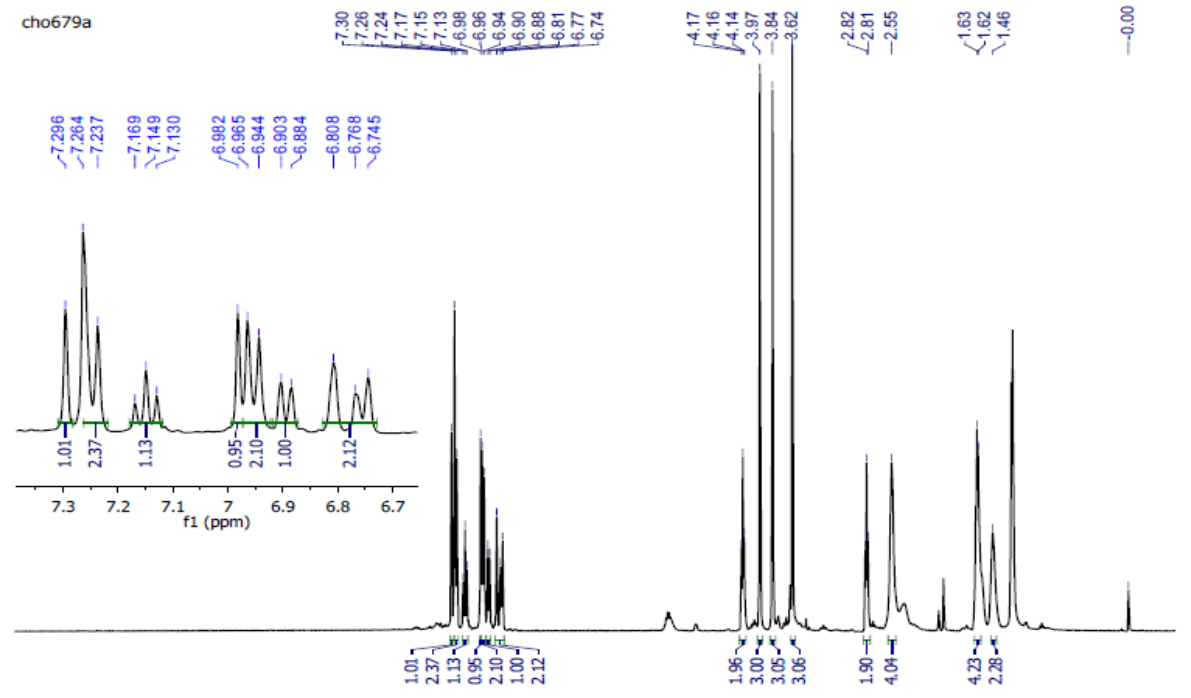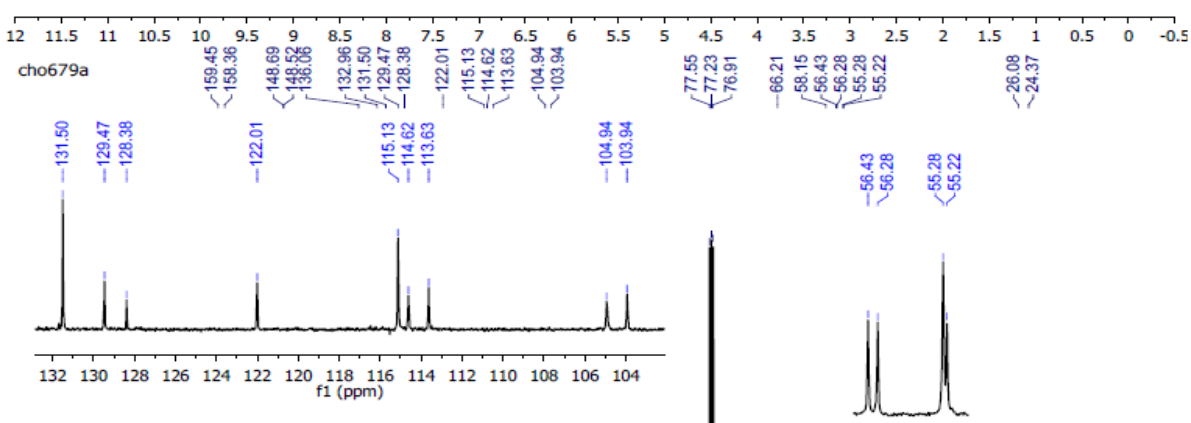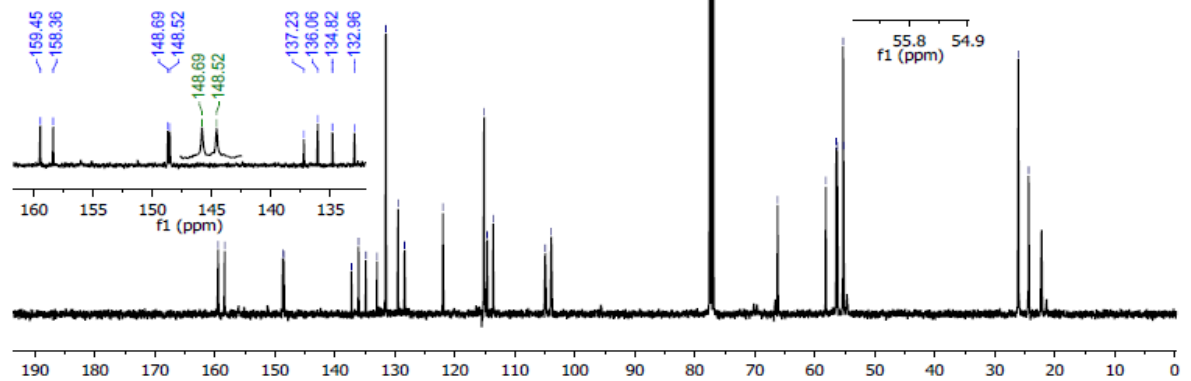

Compound 6{47}

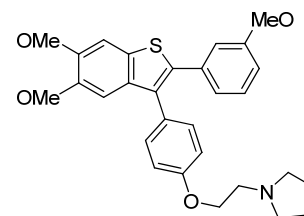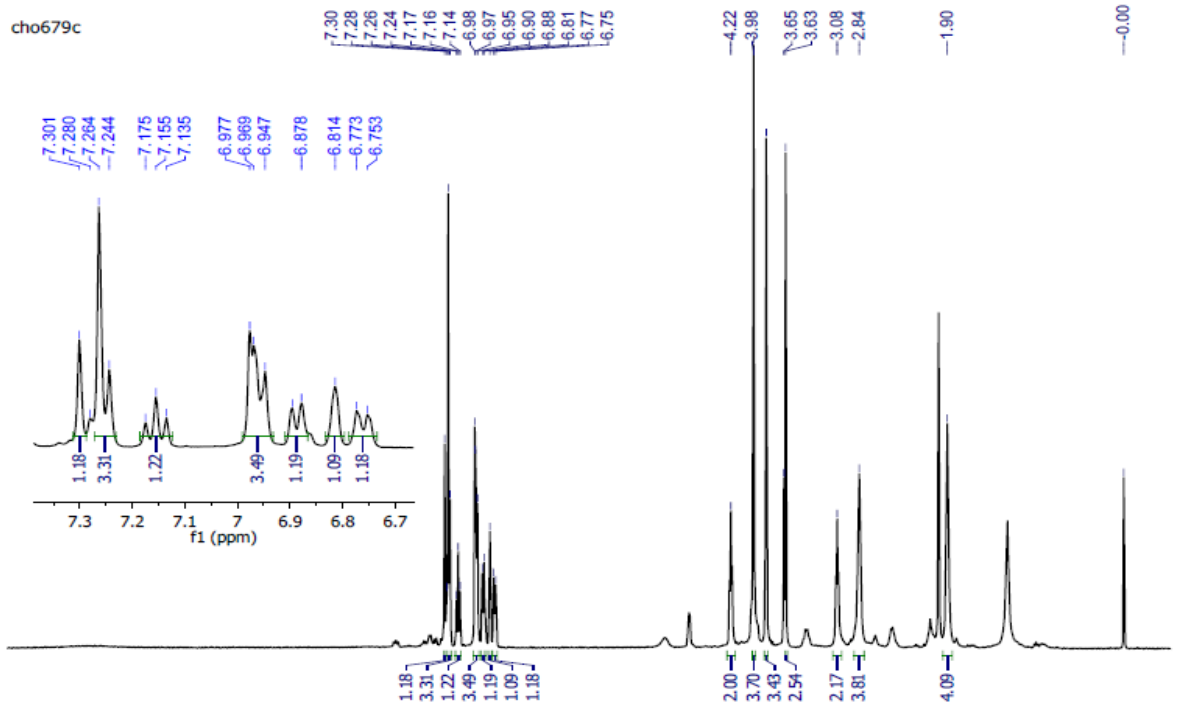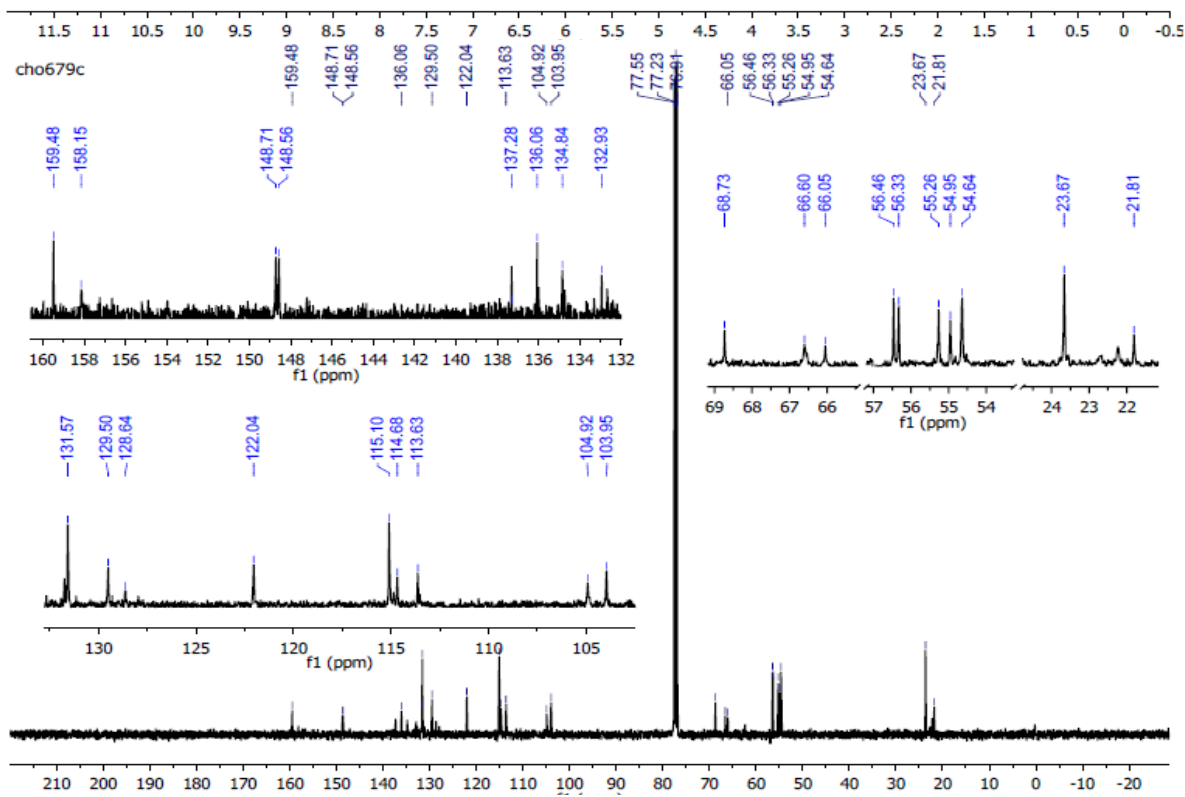

Compound 6{49}

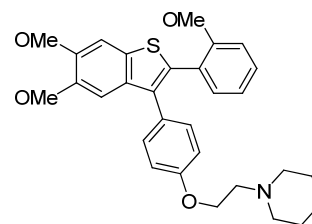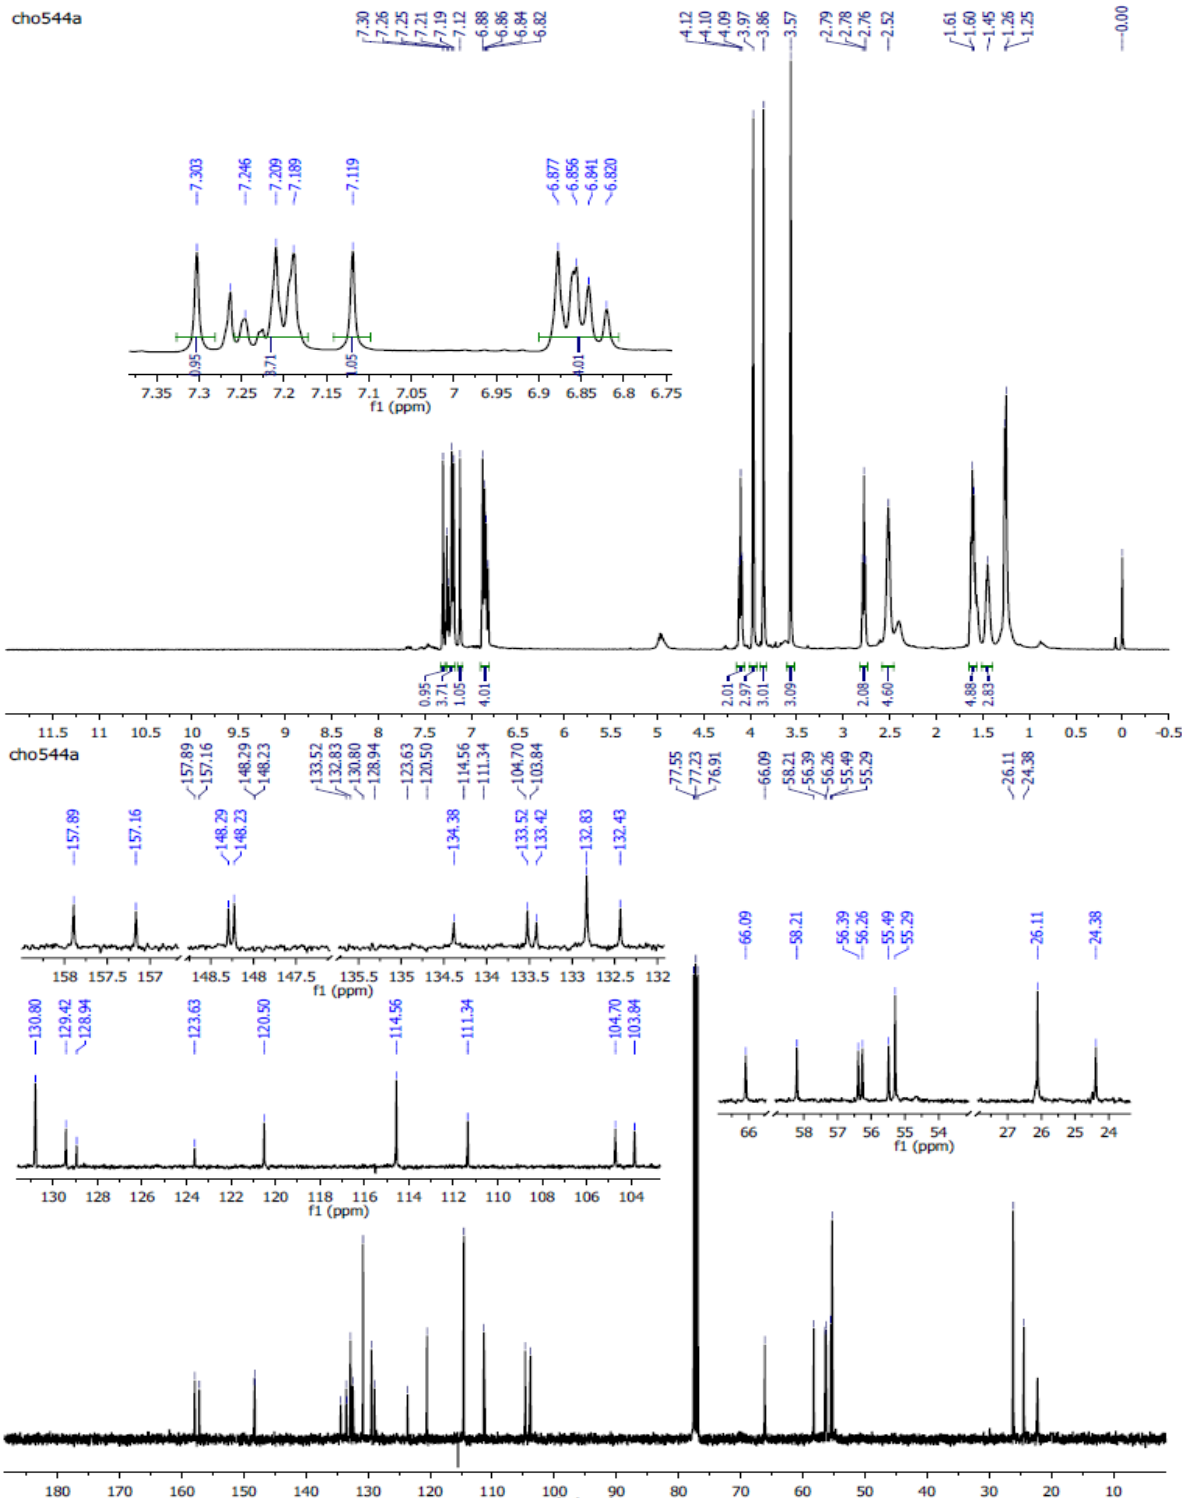

Compound 6{50}

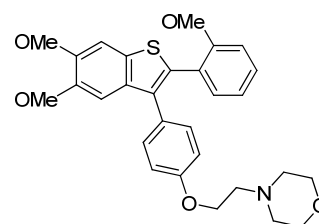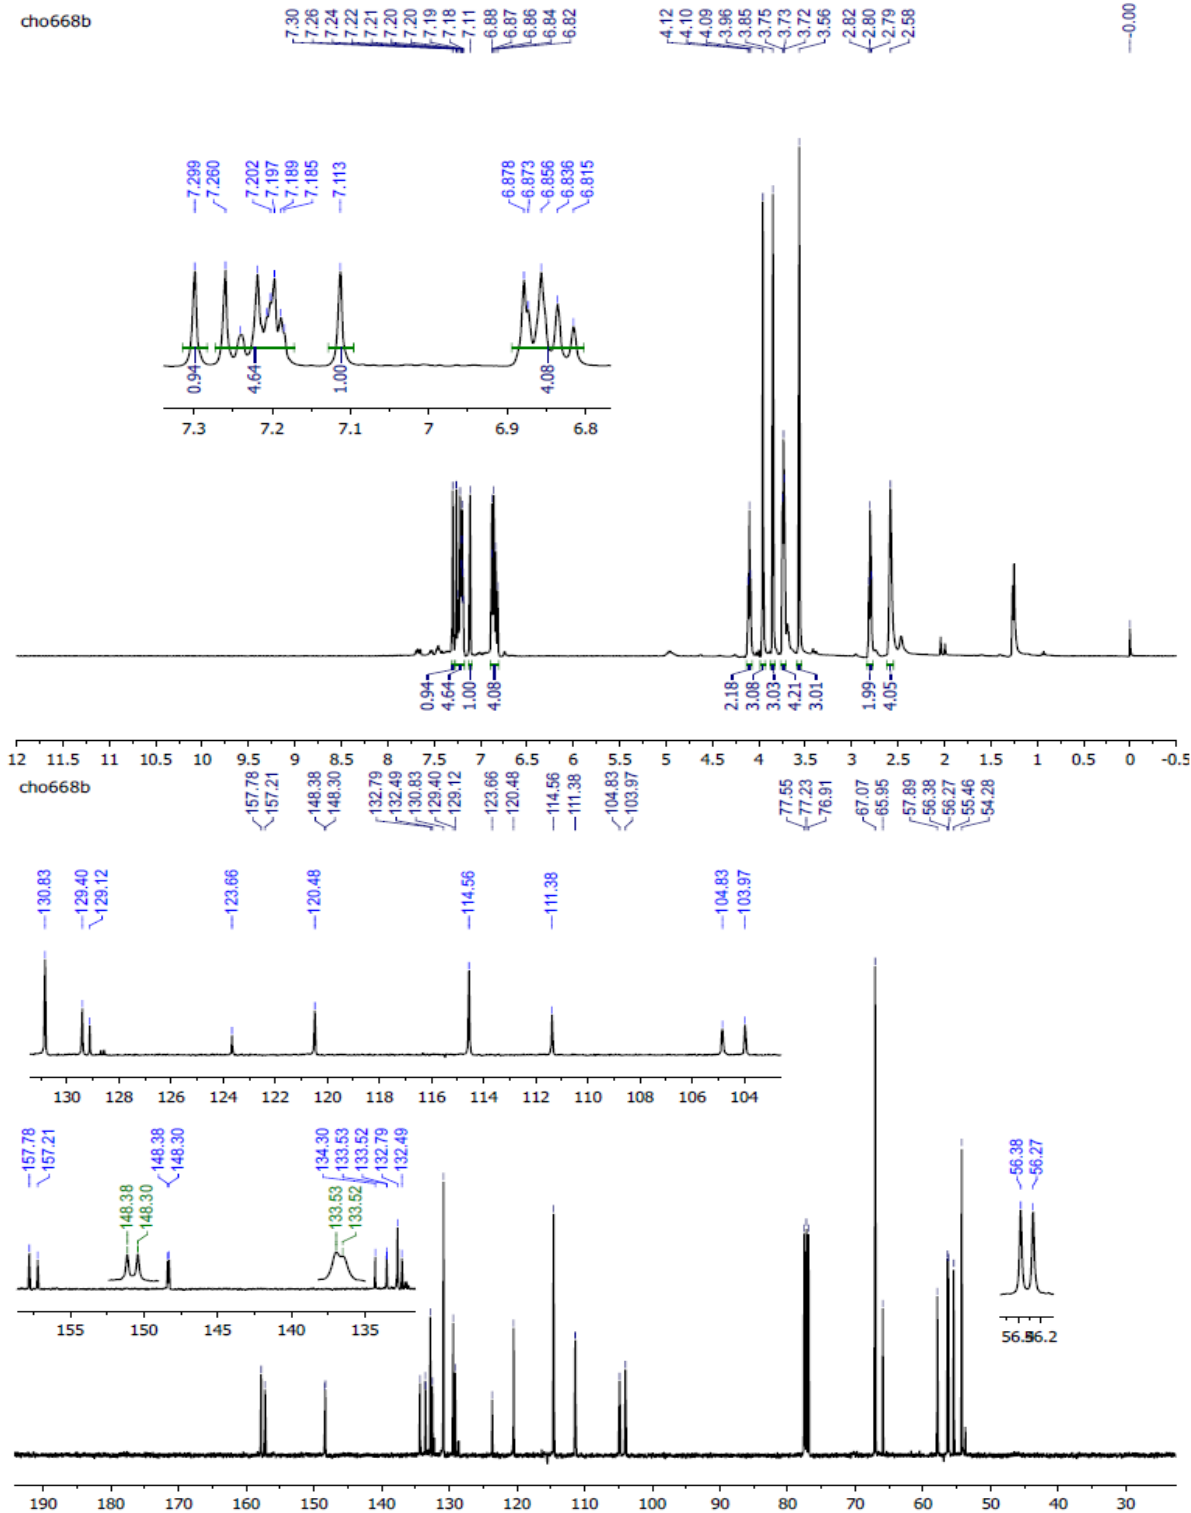



Compound 6{51}

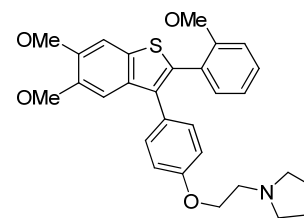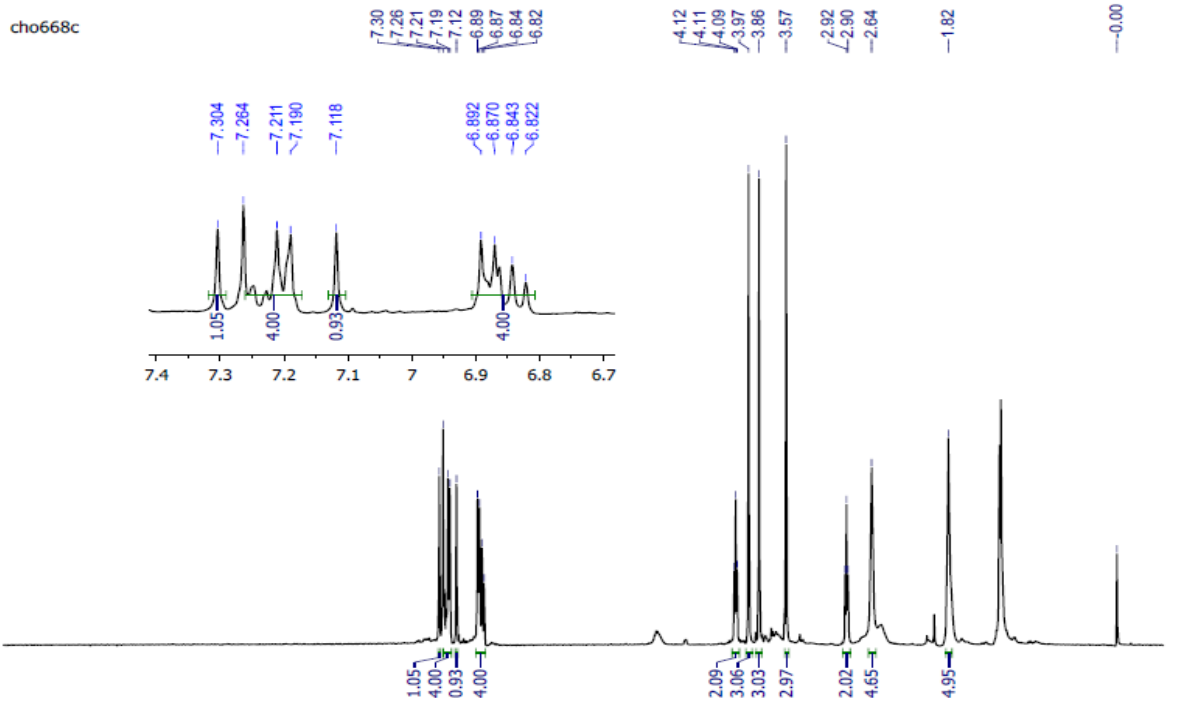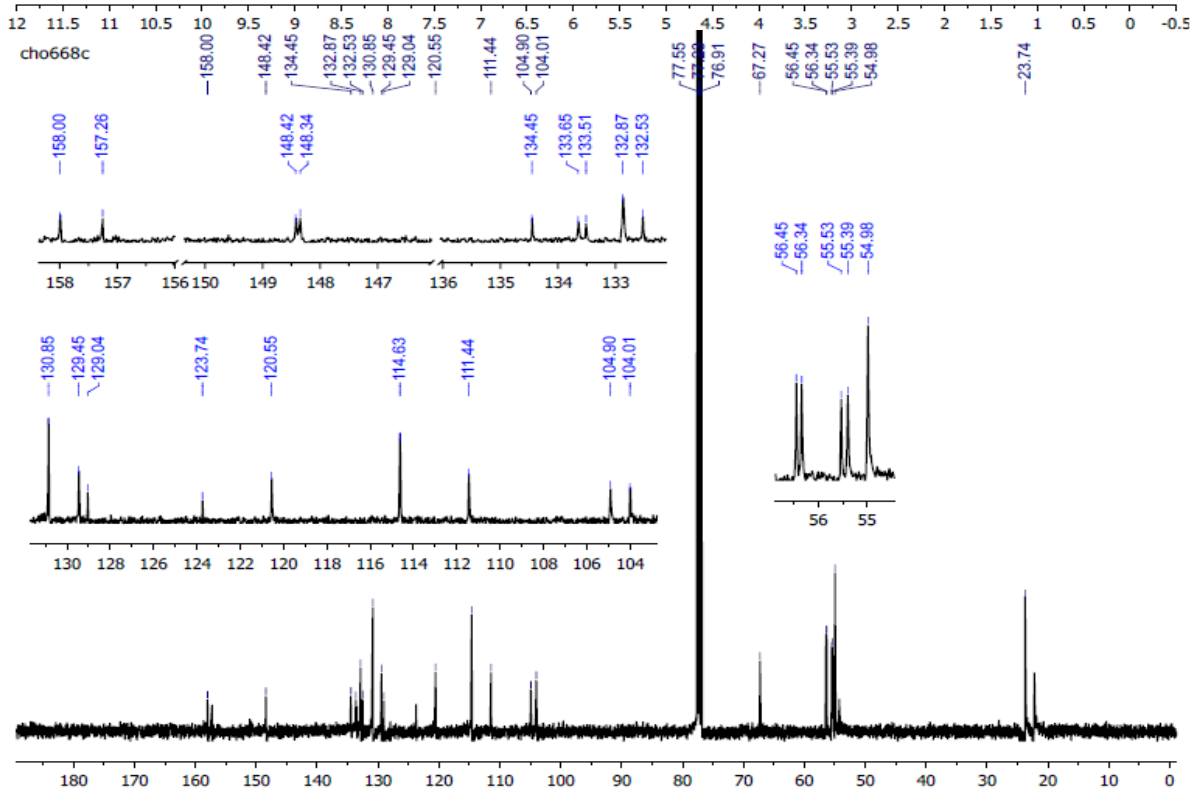

Compound 6{52}

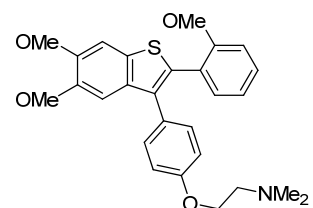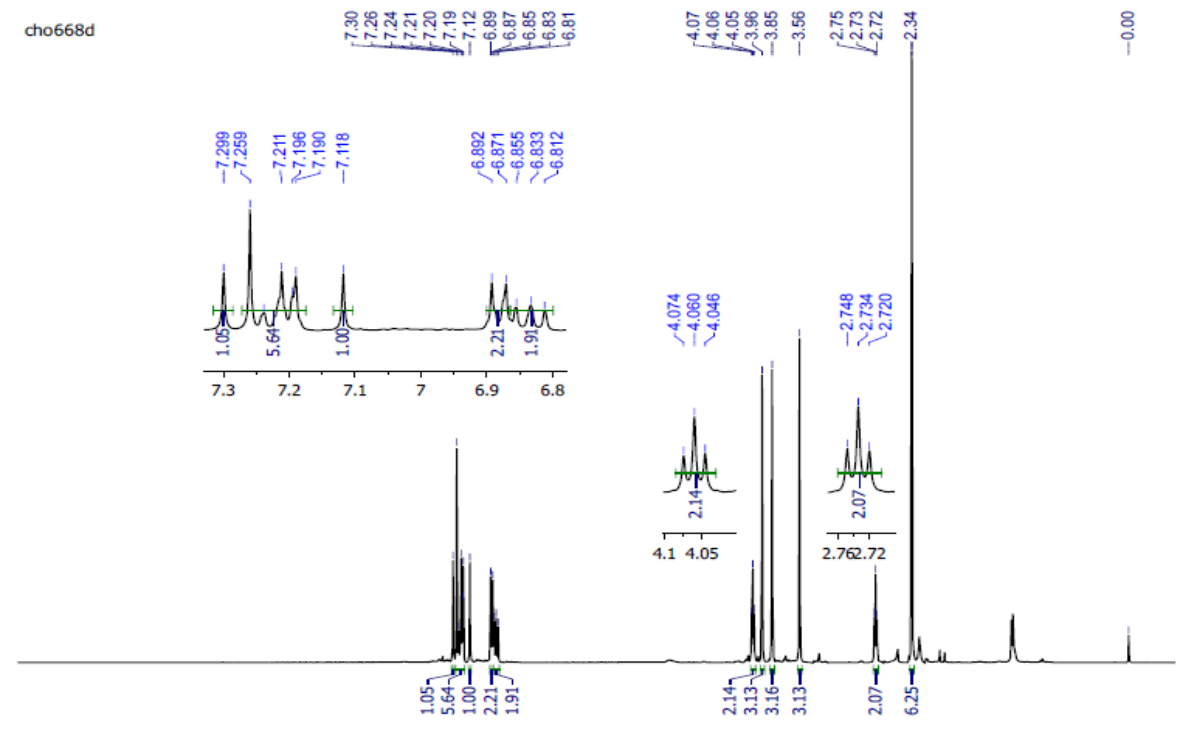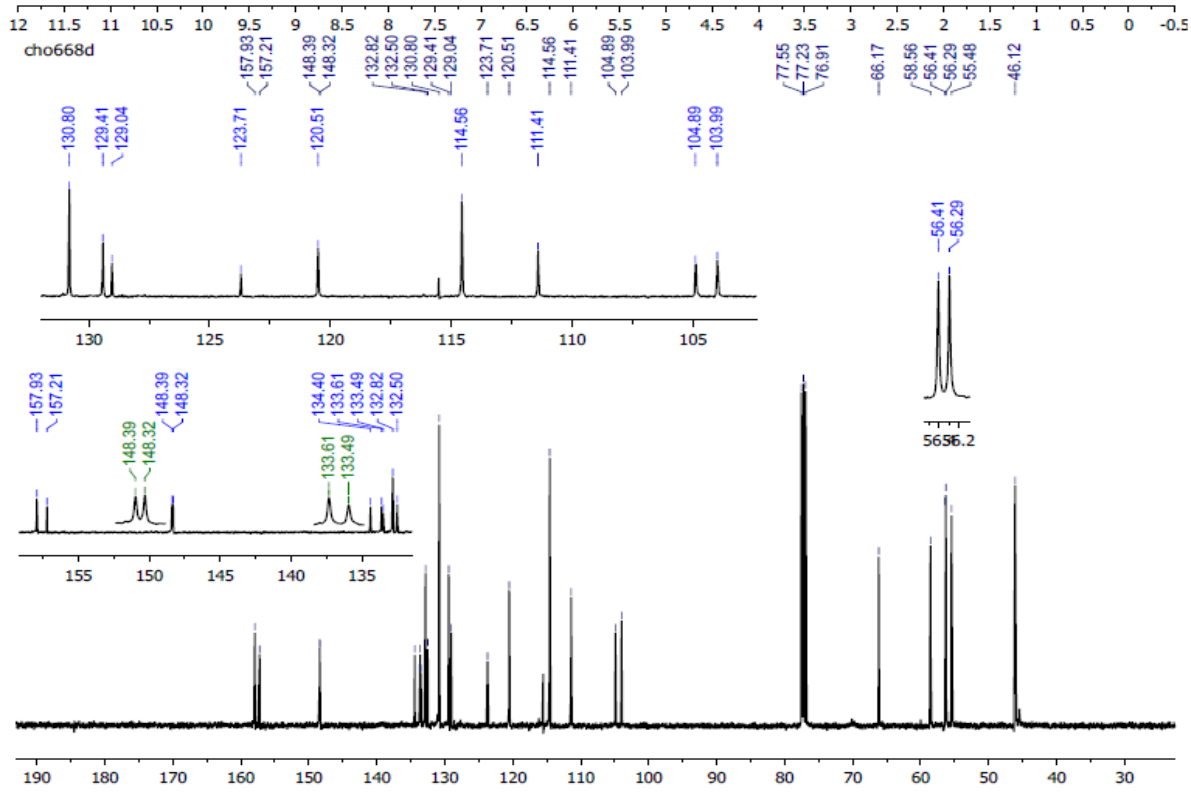

Compound 6{55}

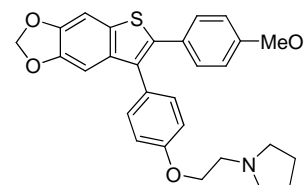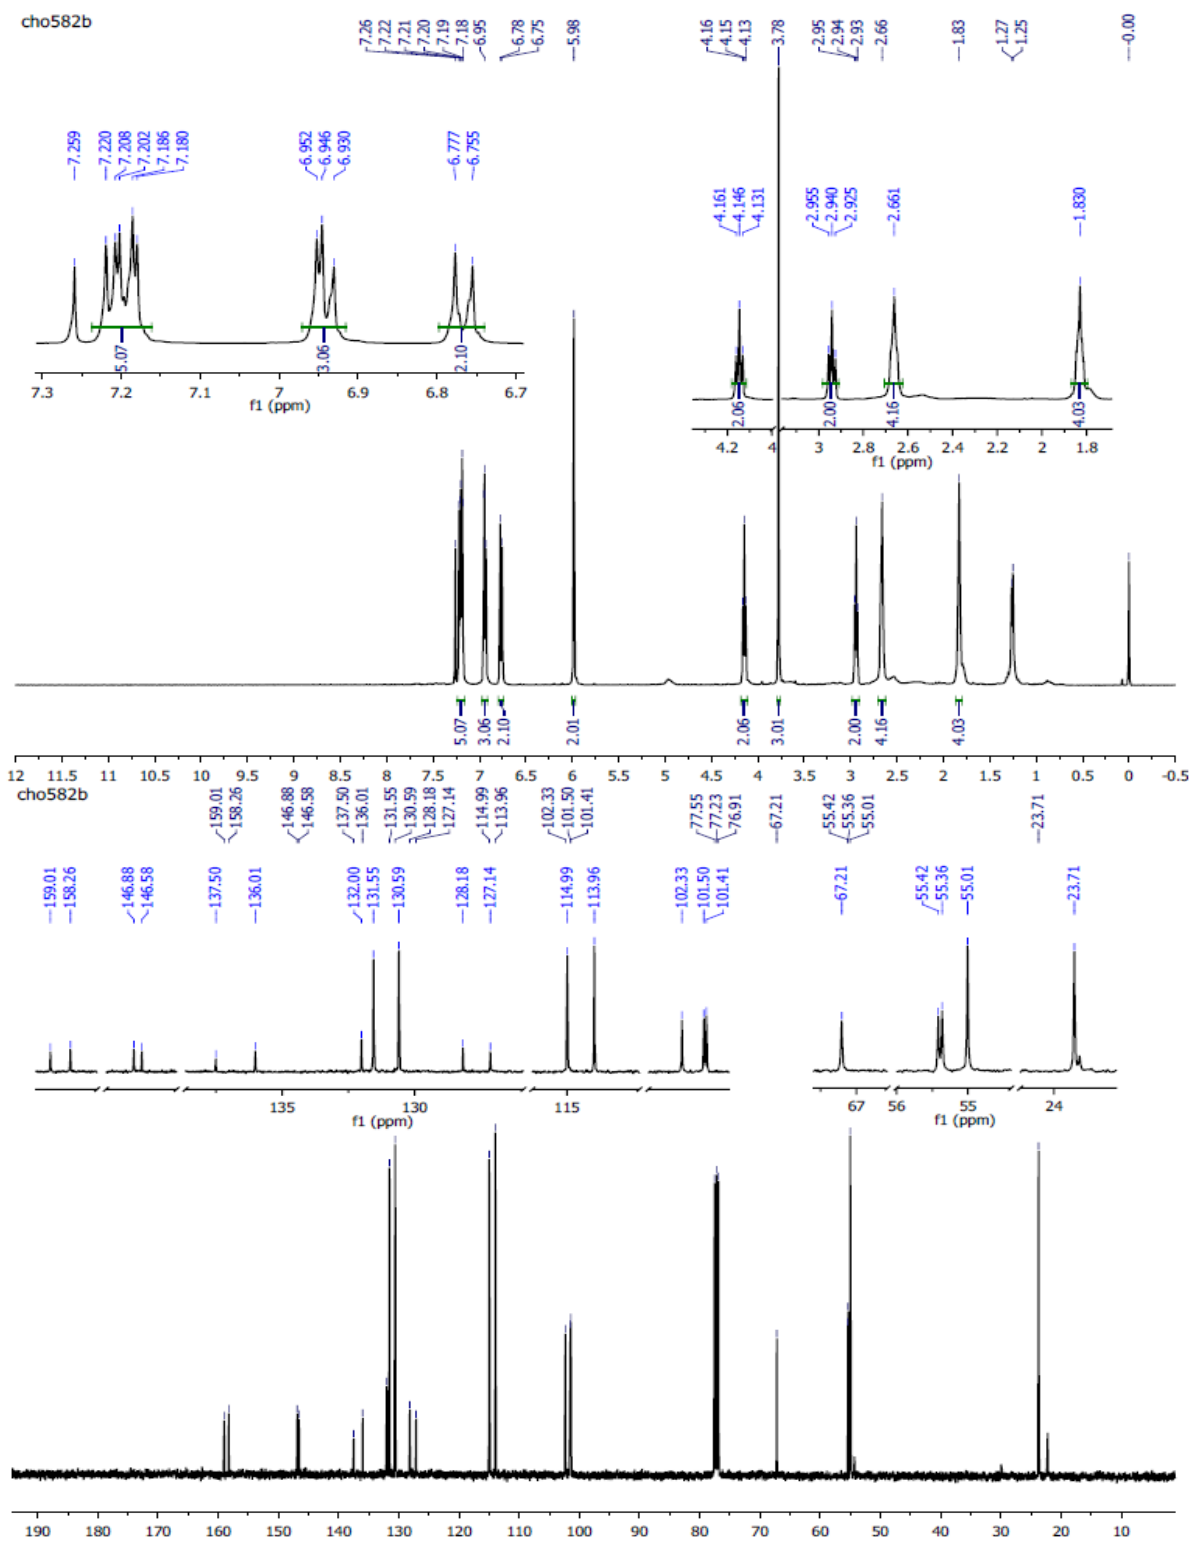

Compound 6{56}

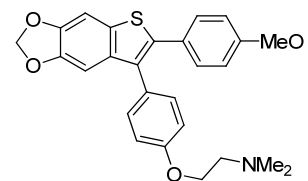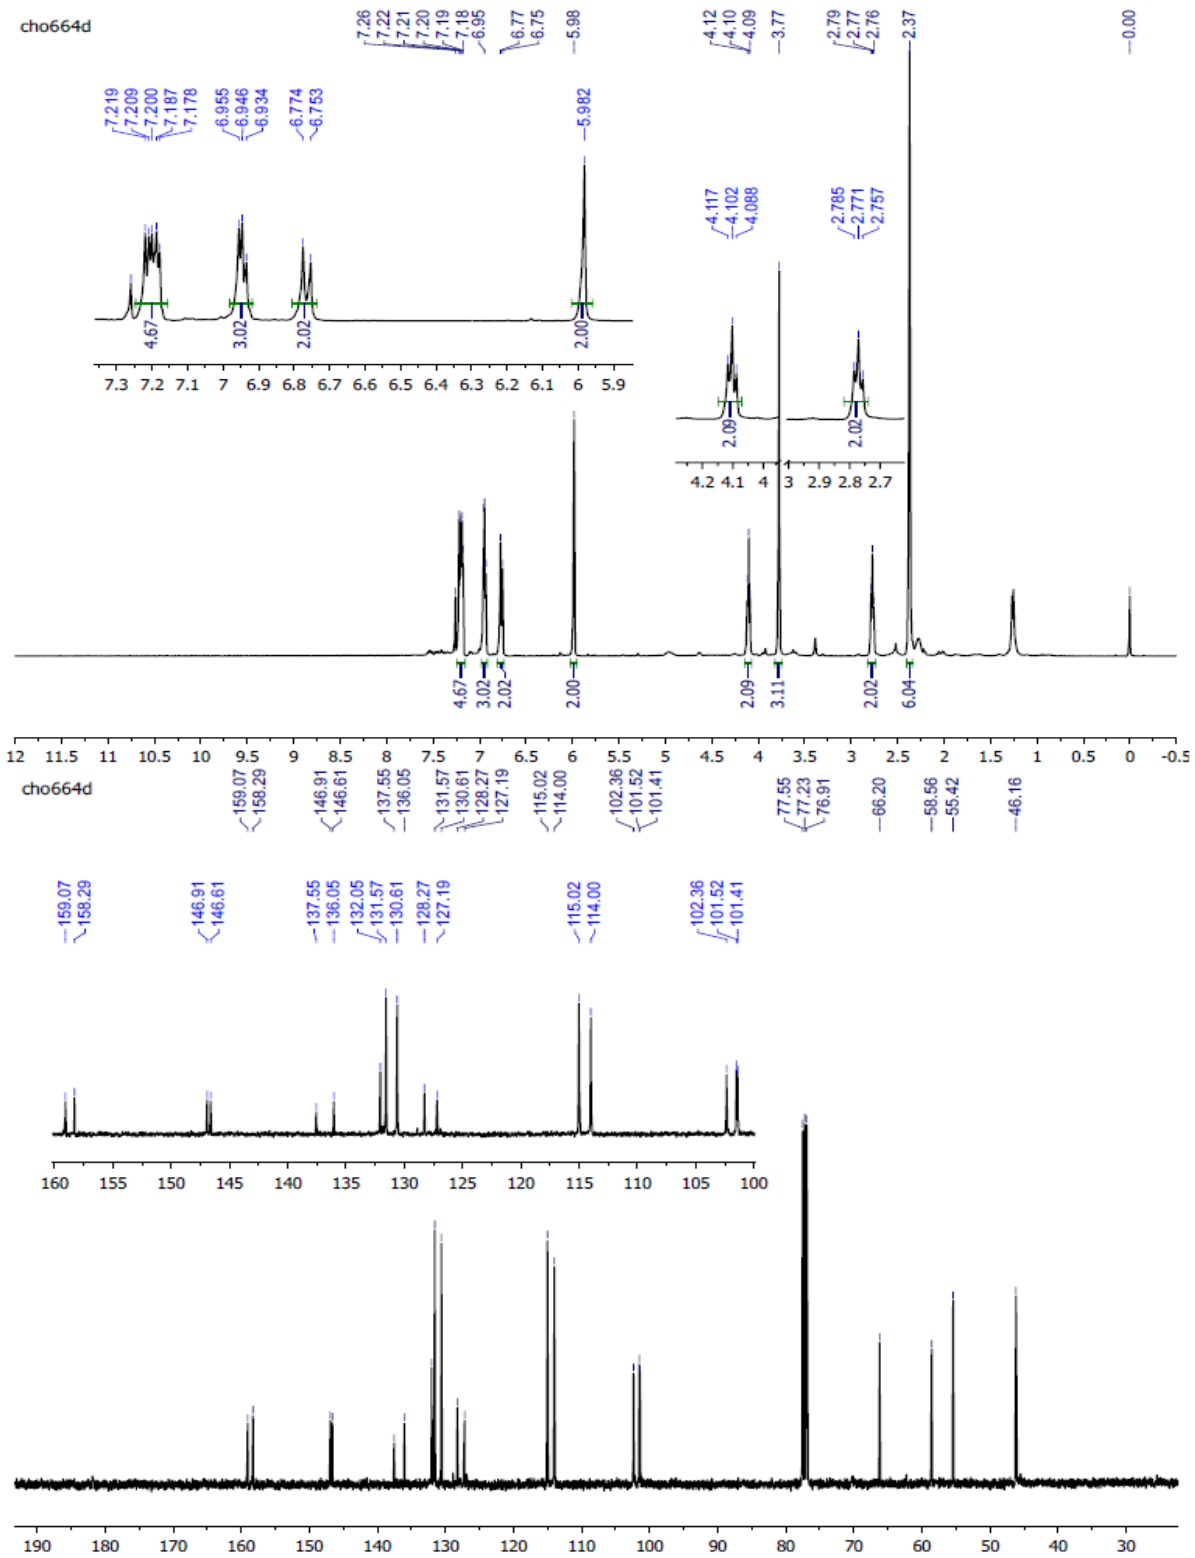

Compound 7{4}

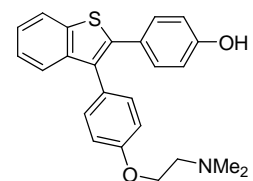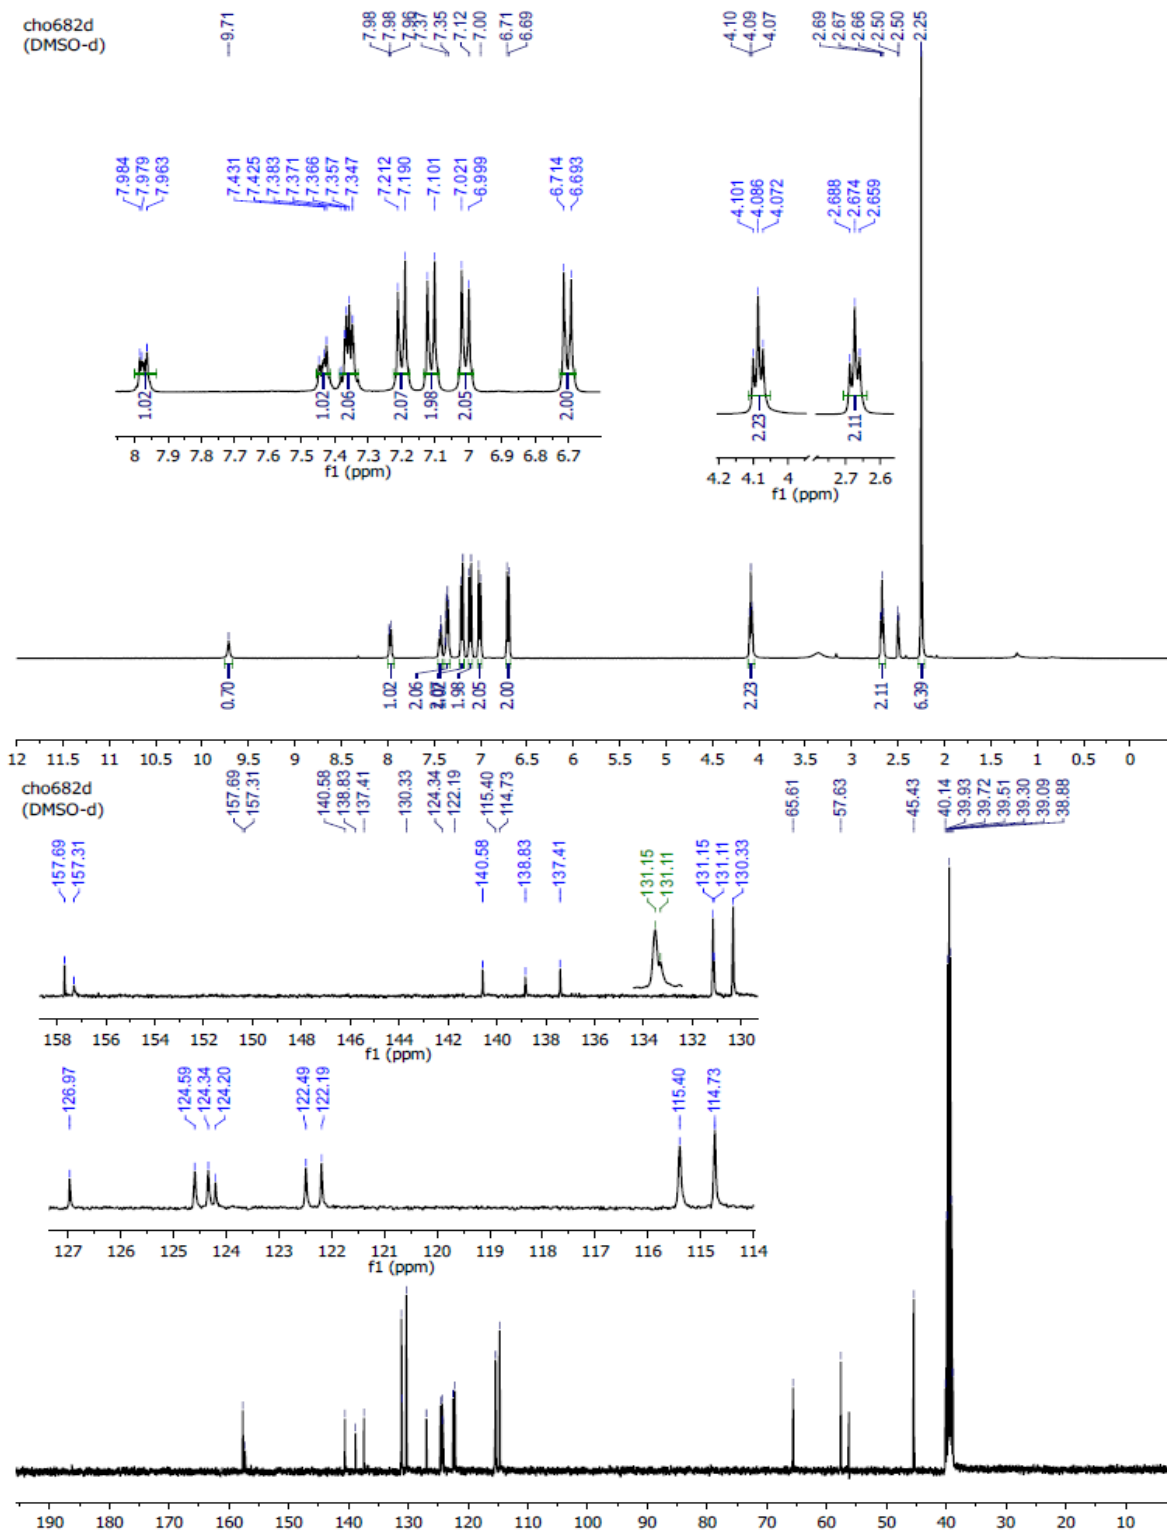

Compound 7{19}

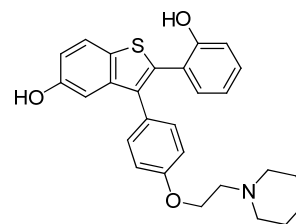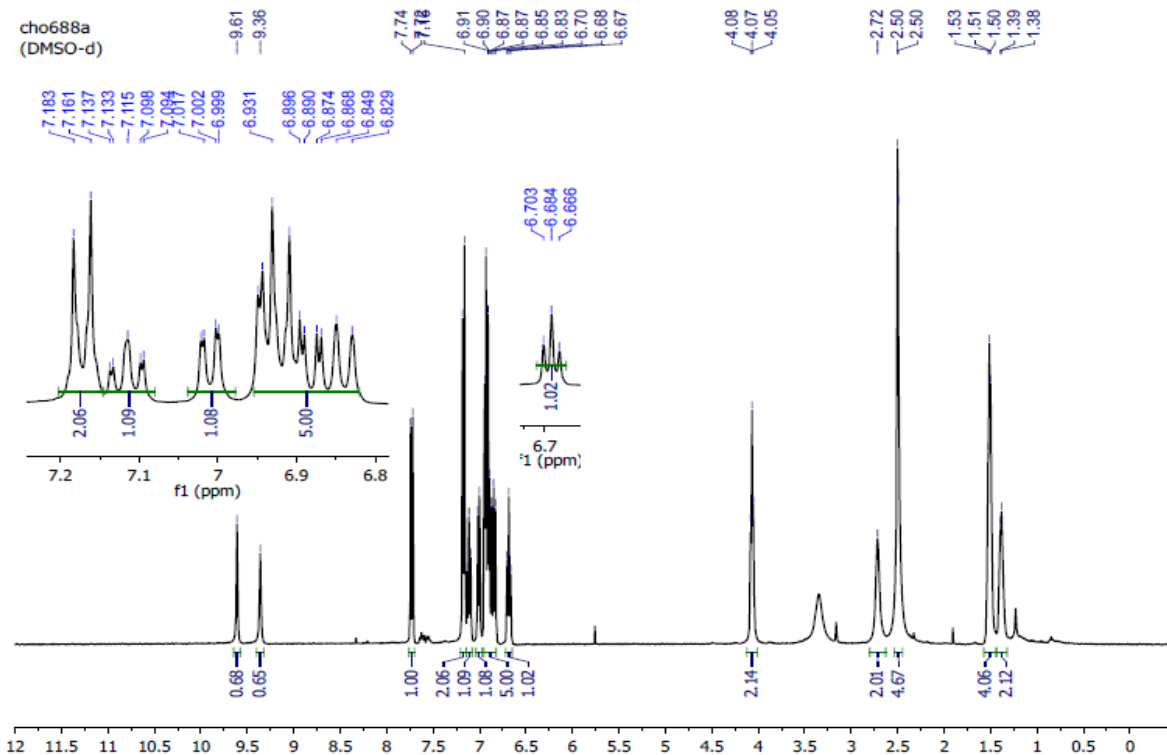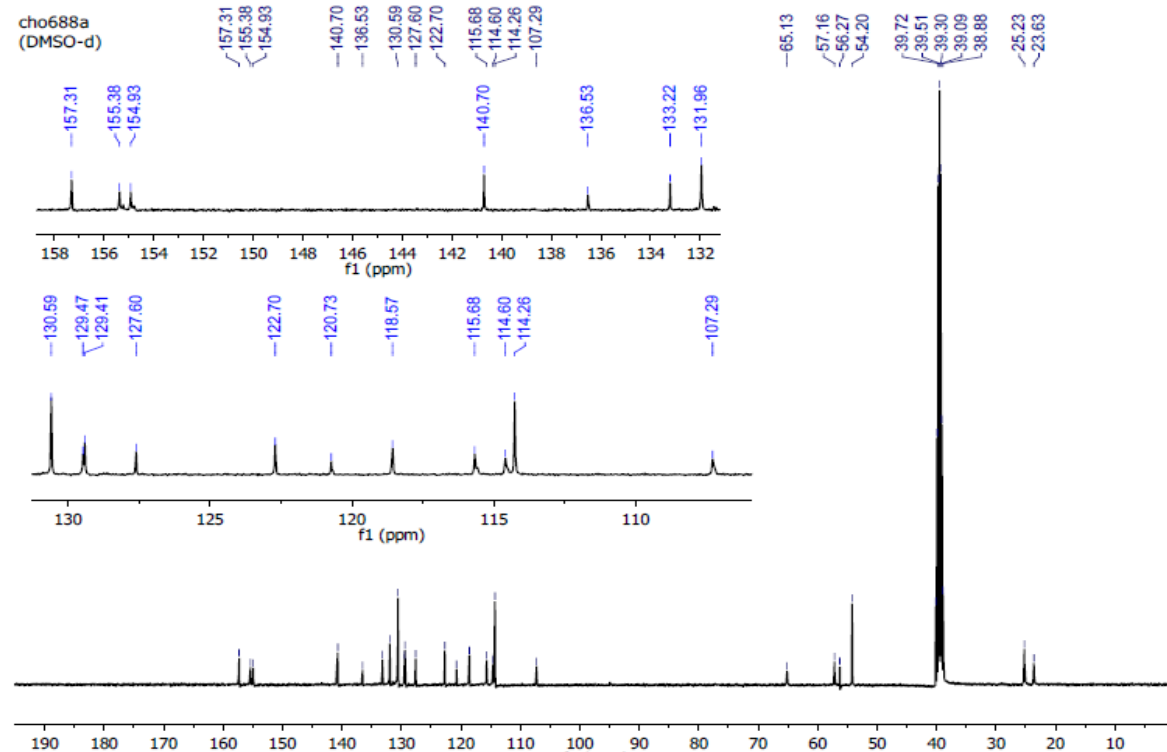

Compound 7{24}

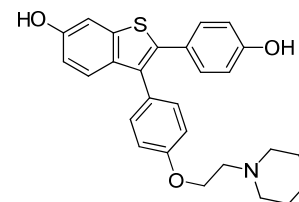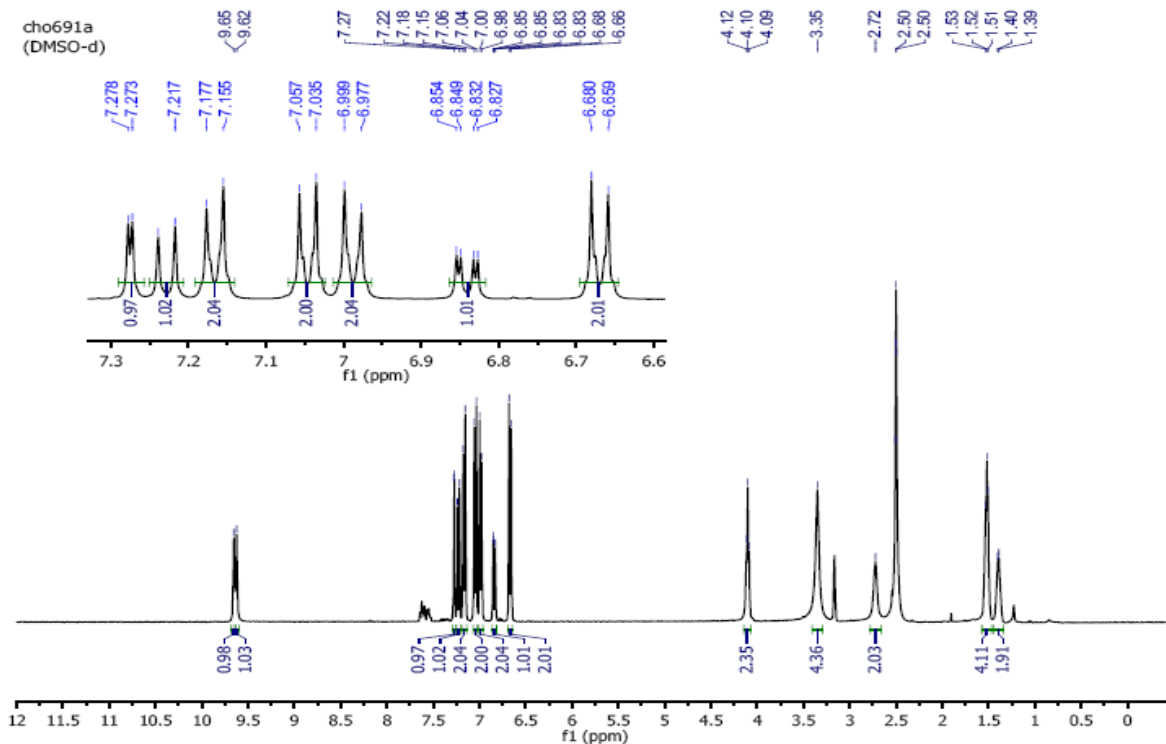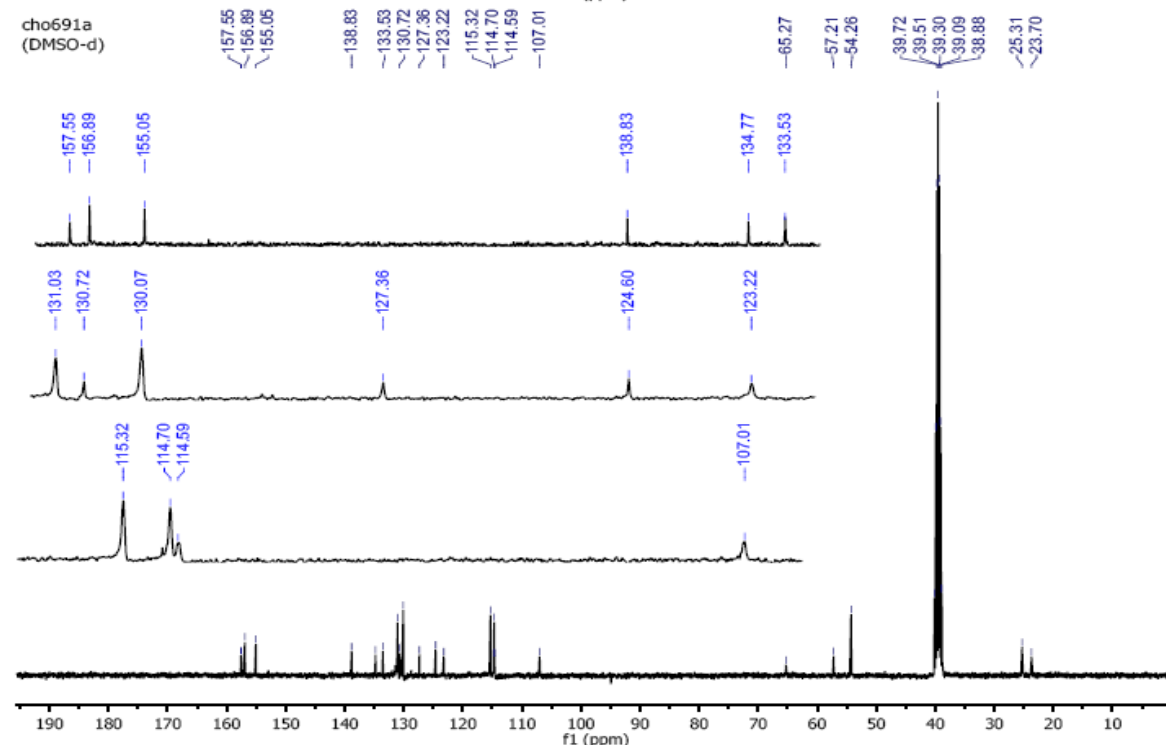

Compound 7{27}

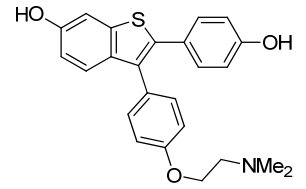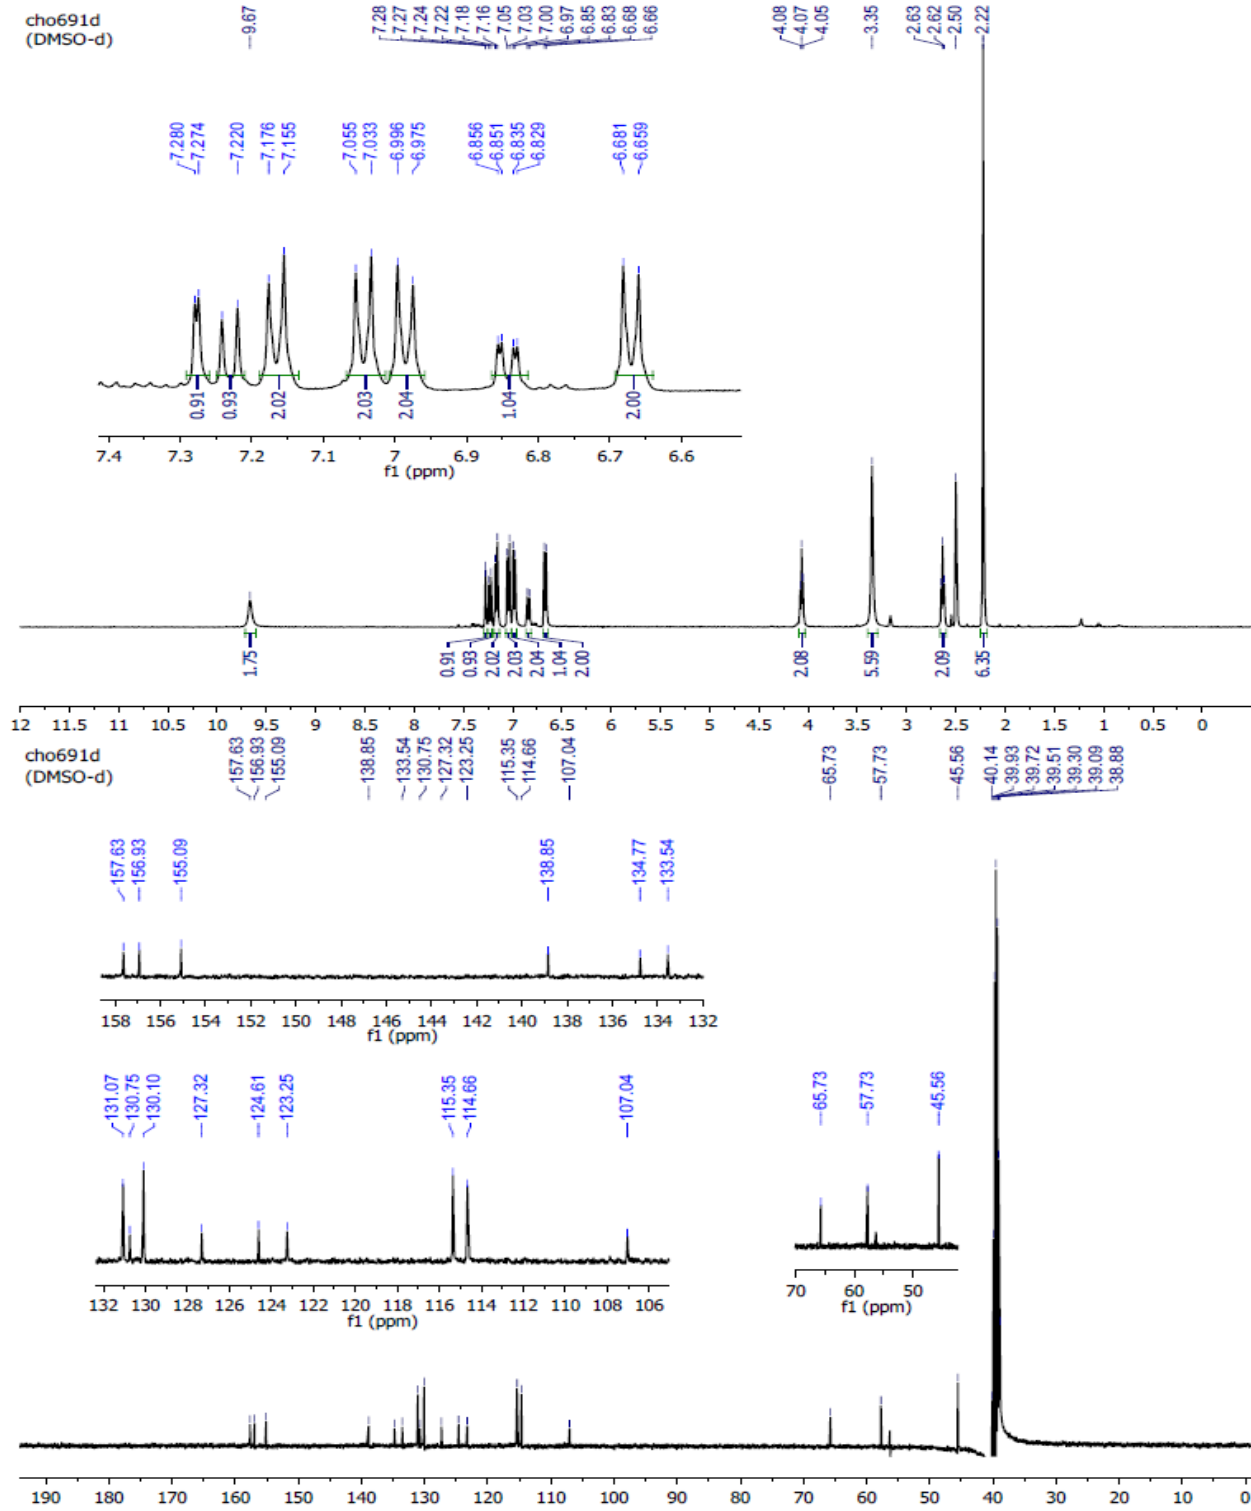

Supplement: NIHMS309970-supplement-1_si_001.pdf [file NIHMS309970-supplement-1_si_001.pdf]
